# Supplementary material for: The subduction influence on ocean ridge basalts and its significance
Source: Research Square preprint supplement (doi:10.21203/rs.3.rs-132754/v1), 2021-01-08
Supplement: Supplementary file 1 [file 3e037cae1d77302ba0aa302e.xlsx]

## Sheet: Sheet1
Table 6 Global MORB and BABB compilation
SampleID	Material	SegName	Reference	Method	Lat	Lon	SiO2	TiO2	FeOt	MgO	Al2O3	CaO	Na2O	K2O	P2O5	MnO	H2O	Ba	Be	Ce	Co	Cr	Cs	Cu	Dy	Er	Eu	Ga	Gd	Hf	Ho	La	Li	Lu	Mn	Mo	Nb	Nd	Ni	Pb	Pr	Rb	Sc	Sm	Sn	Sr	Ta	Tb	Th
SON0035-098	GL	BLAU11	KAMENETSKY, 1997;SUN, 2004	LAICP; LA-ICP-MS	-22.5364	-176.773	52.7	0.68	9.76	5.69	15.01	10.52	1.8	0.65	0.2	0.15	1.4	82		23.4			0.221	190	2.83	1.7	0.87		2.75	0.98	0.58	9.2		0.265		0.51	0.62	14		1.63	3.15	18.1	36.5	2.79		492	0.03	0.422	0.74
SON0067-2-240	GL	BLAU11	KAMENETSKY, 1997;SUN, 2004	NN; LAICP; LA-ICP-MS	-22.5364	-176.773	52.77	0.63	8.88	6.39	15.52	11.09	1.64	0.55	0.18	0.12	1.45	72.4		20.5			0.2	161	2.47	1.46	0.77		2.39	0.82	0.51	8.4		0.225		0.42	0.5	12.2		1.41	2.79	16.2	37.5	2.43		466	0.025	0.368	0.639
SHK0846-1	GL	BLAU11	Gale, 2013	ICP-MS	-22.532	-176.718												94.4952	0.5449	11.391	30.9869	3.2795	0.1737	60.7856	5.3172	3.3528	1.2317	18.6369	4.6422	2.016	1.1789	4.1228	7.3245	0.5312	0.2083	0.7132	0.9628	9.9731	8.7292	1.2372	1.8716	7.1462	34.7248	3.3095	0.7089	173.125		0.8075	0.3633
SON0035-092-001	GL	BLAU11	PEATE, 2001	ICP-MS; MS-ID	-22.3737	-176.673												92.5		10.76	34	2	0.16	59	5.25	3.3	1.22	17.7	4.46	1.95	1.13	3.93		0.51			0.91	9.4	12	1.19	1.77	6.43	33.4	3.27		160	0.075	0.8	0.349
SON0035-090-001	GL	BLAU11	PEATE, 2001	ICP-MS; MS-ID	-22.325	-176.656												101.1		12.73	28.2	2	0.19	37	5.96	3.81	1.4	17.6	5.16	2.32	1.31	4.68		0.6			1.14	11	2	1.22	2.08	7.25	30.8	3.84		164	0.091		0.401
LEE1984-3-002-004	WR	BLAU11	VALLIER, 1991; JENNER, 1987	INAA; ICP; MS-ID; XRF	-22.3232	-176.655	55.1448	1.4912	12.0788	4.19526	14.3156	8.08233	3.10171	0.407596	0.159062	0.208769		95.1		10.81		5	0.17		5.35	3.45	1.21		4.54	2.1		3.93		0.52			0.95	9.61	17			6.59	35.2	3.25		167	0.059
LEE1984-3-002-006	WR	BLAU11	VALLIER, 1991	INAA; ICP; MS-ID; XRF	-22.3232	-176.655												95		10.9		4	0.17		5.34	3.46	1.24		4.52	2		3.83		0.48			0.95	9.6	15			6.63	35.3	3.27		169	0.066
KLM0417-019-001	GL	BLAU11	Gale, 2013	ICP-MS	-22.319	-176.606												82.7812	0.5394	10.3106	34.1334	10.4193	0.1589	108.115	4.9381	3.1365	1.0843	16.8377	4.2479	1.9291	1.0879	3.7072	6.7127	0.4939		0.3986	0.979	9.0593	15.9287	1.0693	1.709	6.8105	34.3525	2.9894	0.6734	165.851	0.0744	0.7365	0.3251
NAU1989-017-001	GL	BLAU11	HAASE, 2009	ICP-MS	-22.31	-176.59												125		7.26	44	197	0.22	118	2.19	1.35	0.53		1.94	0.87	0.48	3.08		0.21			0.39	5.28	69.1	1.18	1.07	5.25	30.4	1.65		172	0.04	0.34	0.35
LEE1984-3-001-007	WR	BLAU11	VALLIER, 1991; JENNER, 1987	INAA; ICP; MS-ID; XRF	-22.301	-176.654	56.3971	1.36949	11.2933	3.70159	14.4293	7.58181	3.34433	0.516039	0.168705	0.218324		102		12.3		4	0.19		5.85	3.82	1.33		4.87	2.2		4.41		0.58			1.1	10.7	17			8.4	32.4	3.61		169	0.067
LEE1984-3-001-011	GL	BLAU11	DAVIS, 1990; PEATE, 2001	EMP; ICP-MS; MS-ID	-22.301	-176.654	56.7	1.52	11.2	2.7	14.6	7.37	3.4	0.45	0.17	0.2		101		12.2	30.2	3	0.18	69	5.84	3.75	1.31	18.7	4.91	2.38	1.28	4.38		0.6			1.11	11.3	7	1.22	2.07	7.67	30	3.69		162	0.082	0.88	0.397
SON0035-080-007C1	WR	BLAU11	HAASE, 2009	ICP-MS	-22.2947	-176.56												57		4.18	44		0.14	58.6	1.33	0.82	0.34		1.13	0.45	0.27	1.7		0.12				3.39	501	0.8	0.63	5.14	54	1.01		105		0.2	0.25
SON0035-080-007C2	WR	BLAU11	HAASE, 2009	ICP-MS	-22.2947	-176.56												223		9.94	33.4	147	0.3	70.3	2.56	1.62	0.68		2.14	1.2	0.54	4.21		0.24			1.1	7.09	385	1.76	1.41	7.77	34.1	2.04		201		0.38	0.57
NAU1989-017-010	WR	BLAU11	HAASE, 2009	ICP-MS	-22.29	-176.59														10					2.3	1.3	0.67		1.8			4.3		0.2				6.7						1.7
SON0035-110	WR	BLAU11	HAASE, 2009	ICP-MS	-22.29	-176.57												128		9.02	43	249	0.3	117	2.28	1.39	0.62	13	2.1	0.89	0.5	3.83	4.63	0.24		0.61	0.43	6.16	58.8	1.17	1.32	9.3	45.1	1.78	0.37	200	0.027	0.36	0.48
SON0035-128	GL	BLAU11	KAMENETSKY, 1997;SUN, 2004	NN; LAICP; LA-ICP-MS	-22.2899	-176.567	53.38	0.5	8.45	8.2	13.44	11.98	1.25	0.51	0.09	0.23	2.05	129		8.6			0.26	137	1.94	1.19	0.55		1.75	0.65	0.41	3.63		0.189		0.8	0.38	4.98		1.72	1.14	11.4	41.3	1.53		211	0.02	0.275	0.48
SON0035-128-002	WR	BLAU11	BOESPFLUG, 1990; HAASE, 2009	XRF; MS-ID; ICP-MS	-22.2899	-176.567	52.57	0.57	9.19	7.52	14.44	12.04	1.06	0.71	0.16	0.17		164		11.4	44.3	174.2	0.43	126.8	2.49	1.49	0.74	14.2	2.48	1.08	0.54	4.82	5.82	0.25		0.6	0.52	7.32	46.9	1.42	1.69	13.6	40.7	2.04	0.61	237.2	0.032	0.41	0.52
SON0035-128-003	WR	BLAU11	HAASE, 2009	ICP-MS	-22.2899	-176.567	53.0857	0.694449	10.1092	5.6052	15.6053	11.0715	1.84525	0.634925		0.188493		170		9.74	40.9	164	0.27	107	2.57	1.68	0.76		2.46	1.17	0.54	3.96		0.26			1.5	7.24		2.73	1.44	10.1	35.3	2.24		212		0.4	0.54
SON0035-124-001	WR	BLAU11	HAASE, 2009	ICP-MS	-22.2895	-176.571	53.77	0.63	9.87	7.31	15.01	12.21	1.63	0.52	0.1	0.19		143		7.84	44	308	0.23	138	2.17	1.35	0.59		1.84	0.79	0.44	3.35		0.19			1.1	5.73		1.85	1.17	7.74	37.8	1.74		191		0.33	0.43
KLM0417-020-001	GL	BLAU11	Gale, 2013	ICP-MS	-22.283	-176.556												138.96	0.3078	7.8073	41.0327	146.752	0.2355	123.477	2.5109	1.5798	0.6379	14.4896	2.2519	0.9141	0.5494	3.3195	4.9725	0.2599		0.6463	0.4778	5.8275	36.2621	1.562	1.1609	7.0665	43.4103	1.7456	0.374	199.627	0.036	0.3891	0.4681
SHK0835-4-1	GL	BLAU11	Gale, 2013	ICP-MS	-22.216	-176.609												120.853	0.6426	14.6221	19.6306	1.8121	0.2168	22.5256	6.565	4.1187	1.4994	18.594	5.8251	2.5794	1.4603	5.3895	8.5897	0.6508	0.1992	0.6789	1.2377	12.6957	2.0894	1.5412	2.4207	8.957	22.8829	4.2186	0.8717	182.442		0.9892	0.4757
SHK0837-1	GL	BLAU11	Gale, 2013	ICP-MS	-22.214	-176.61												119.952	0.7298	14.6437	20.0894	1.6633	0.2236	23.1908	6.5778	4.1186	1.4883	18.5858	5.7297	2.5664	1.4421	5.3546	8.4189	0.6398	0.1996	0.6051	1.2451	12.5652	2.1635	1.5278	2.3998	8.9019	23.5726	4.125	0.8819	182.156		0.9906	0.463
SHK0838-2	GL	BLAU11	Gale, 2013	ICP-MS	-22.214	-176.608												132.535	0.7539	16.7784	15.9105	1.5737	0.2443	25.6671	7.3086	4.5719	1.6155	18.7116	6.4329	2.9001	1.6131	6.1847	9.3657	0.7191	0.1934	0.7182	1.3507	14.3737	2.2091	1.6436	2.7247	10.241	20.3441	4.7507	0.9945	180.166		1.114	0.541
SON0048-114	GL	BLAU10	LOOCK, 1992;SUNKEL, 1990; PEATE, 2001	MS-ID; XRF; ICP-MS	-22.1882	-176.544	51.1	0.6	9.211	7.1	15.05	12.3	1.35	0.28	0.08	0.19		90.2		4.28	41.8	40	0.153	112	2.16	1.38	0.53	12.8	1.89	0.66	0.48	1.7		0.22			0.23	3.97	38	1.12	0.7	4.41	43.1	1.29		167	0.025		0.177
KLM0417-016-001	GL	BLAU11	Gale, 2013	ICP-MS	-22.186	-176.623												112.327	0.6771	13.7072	21.8526	9.3728	0.2085	33.7228	6.3321	3.9897	1.4108	17.3458	5.5296	2.4676	1.3768	4.8553	8.5064	0.6248		0.5623	1.2189	12.0267	4.6388	1.3577	2.2738	8.2685	27.7238	3.8761	0.8104	173.834	0.0896	0.9624	0.4534
SON0067-196-001	GL	BLAU10	HAASE, 2009	ICP-MS	-22.18	-176.55												91.6		6.84	42.1	37.7	0.24	128	2.74	1.69	0.68	15	2.35	0.93	0.61	2.54	4.11	0.28		0.44	0.36	5.56	34.1	1.39	1.1	5.21	45	1.83	0.43	186	0.028	0.42	0.24
SHK0839-1	GL	BLAU10	Gale, 2013	ICP-MS	-22.172	-176.601												81.6443	0.5925	10.8706	34.4928	7.597	0.1458	75.8726	5.2372	3.3111	1.1681	18.7918	4.5	2.0293	1.1541	3.9202	6.9023	0.5267	0.1932	0.4142	0.9579	9.5471	12.5588	1.1393	1.7975	6.3196	35.1449	3.2106	0.7238	167.566		0.788	0.3325
KLM0417-021-004	GL	BLAU10	Gale, 2013	ICP-MS	-22.17	-176.571	55.4398	1.58066	12.2959	3.92032	14.2857	8.00654	2.85339	0.403359	0.199976	0.210701		89.8195	0.5521	11.122	32.704	6.4553	0.1635	88.2077	5.3454	3.3776	1.1601	18.0713	4.5762	2.1207	1.1783	4.075	7.176	0.5312	0.188	0.4725	1.0063	9.8225	12.9091	1.159	1.8589	7.3186	33.2066	3.2408	0.7642	163.125	0.0778	0.8038	0.358
KLM0417-015-001	GL	BLAU10	Gale, 2013	ICP-MS	-22.166	-176.596												66.1318	0.375	8.3583	40.3771	4.2386	0.1201	81.0785	4.5884	2.9217	0.9954	17.7757	3.8371	1.6827	1.0132	2.9898	6.4028	0.459	0.2008	0.3137	0.8262	7.6094	15.7248	0.8442	1.4369	5.6883	35.3623	2.5912	0.5903	142.233	0.0639	0.6814	0.2572
KLM0417-029-001	GL	BLAU10	Gale, 2013	ICP-MS	-22.164	-176.578												70.357	0.3096	6.5586	36.6708	40.2343	0.1274	151.907	3.3178	2.0849	0.7506	14.6693	2.7864	1.1132	0.7222	2.2887	4.6986	0.3274	0.1826		0.5136	5.6965	26.3747	0.9235	1.0529	4.1432		1.9132	0.4568	146.994	0.0429	0.4855	0.2257
KLM0417-029-002	GL	BLAU10	Gale, 2013	ICP-MS	-22.164	-176.578												73.5688	0.3694	7.0128	35.7853	43.3581	0.1384	150.683	3.3739	2.1449	0.77	14.8562	2.8565	1.1577	0.7337	2.4095	4.7618	0.3381	0.1825		0.5355	5.9468	24.3829	0.9491	1.1079	4.4391		1.9819	0.476	155.532	0.045	0.5017	0.2134
KLM0417-029-003	GL	BLAU10	Gale, 2013	ICP-MS	-22.164	-176.578												74.4598	0.3772	6.7265	36.9254	44.2419	0.1472	149.994	3.4349	2.1683	0.791	14.9601	2.8945	1.1677	0.7567	2.4616	4.903	0.3437		0.4046	0.5363	6.0451	25.9622	1.0074	1.1218	4.5676	43.3302	2.0145	0.4408	149.27	0.0437	0.5155	0.2284
KLM0417-029-005	GL	BLAU10	Gale, 2013	ICP-MS	-22.164	-176.578												70.96	0.3504	6.5764	36.3116	46.4511	0.1381	147.89	3.2342	2.0561	0.7428	14.6743	2.7257	1.1318	0.7132	2.1942	4.6926	0.3253	0.1813		0.5062	5.6215	25.9251	0.9377	1.0323	4.1466		1.893	0.447	147.371	0.0429	0.482	0.1653
SON0067-195-001	GL	BLAU10	HAASE, 2009	ICP-MS	-22.16	-176.53												91.5		6.09	46.8	109	0.2	138	2.79	1.79	0.63		2.33	0.92	0.6	2.38		0.26			0.43	5	50.4	1.06	0.96	5.5	41.5	1.79		162	0.063	0.42	0.21
KLM0417-026-001	GL	BLAU10	Gale, 2013	ICP-MS	-22.157	-176.606	62.3875	1.37589	9.59228	1.81201	13.8859	5.38549	3.39218	0.573371	0.326642	0.207772		107.666	0.8505	17.137	14.9179	2.4125	0.1977	22.3517	8.2989	5.2322	1.632	18.5086	7.077	3.6149	1.8456	5.7194	11.111	0.8424	0.1858		1.856	14.5654	2.0419	1.5412	2.7228	4.3416		4.7818	1.2556	148.296	0.1285	1.2487	0.8159
KLM0417-018-001	GL	BLAU10	Gale, 2013	ICP-MS	-22.15	-176.607												138.202	0.7434	16.8646	15.9718	2.9025	0.2584	29.6599	7.4811	4.7738	1.59	18.5049	6.6064	3.116	1.6602	6.208	10.1401	0.7292	0.1841	0.7492	1.5228	14.9187	2.3838	1.6754	2.8447	10.2296	22.672	4.7463	1.0123	173.54	0.1129	1.1461	0.5559
SON0035-084-001	GL	BLAU10	PEATE, 2001	ICP-MS; MS-ID	-22.1402	-176.611												48.3		4.21	36.5	99	0.09	93	2.59	1.64	0.59	13.8	2.14	0.85	0.57	1.51		0.26			0.37	3.82	54	0.66	0.72	2.59	39.6	1.46		126	0.04	0.39	0.138
KLM0417-022-001	GL	BLAU10	Gale, 2013	ICP-MS	-22.135	-176.598												74.0953	0.3642	6.8381	35.2507	22.409	0.1399	139.973	3.2017	2.0545	0.7664	16.0968	2.6621	1.1067	0.7088	2.537	3.0281	0.3224	0.1728		0.5102	5.9558	25.7908	0.9362	1.1183	4.3384	36.077	1.9555	0.4284	164.066	0.042	0.4824	0.2587
KLM0417-R057	GL	BLAU10	Gale, 2013	ICP-MS	-22.1334	-176.612	52.2026	0.902425	10.1509	6.94327	15.3123	11.6924	1.858	0.187585	0.0899601	0.181635		74.9762	0.4125	8.4068	35.5116	17.9914	0.1428	101.833	3.9864	2.526	0.9003	15.505	3.4163	1.4634	0.875	3.0947	6.0641	0.3992		0.3325	0.7359	7.359	29.4451	0.9546	1.3839	6.5559	37.4462	2.4321	0.7184	159.663	0.0575	0.6006	0.279
SHK0843-1	GL	BLAU10	Gale, 2013	ICP-MS	-22.125	-176.609												47.3132	0.3513	4.6027	38.7712	74.043	0.0908	100.625	2.9667	1.8782	0.6543	14.9076	2.4207	0.9923	0.6501	1.6015	4.7488	0.2987	0.1639	0.2948	0.3817	4.5417	48.4507	0.7343	0.8079	2.8318	41.4186	1.5846	0.3773	132.436		0.4382	0.1298
KLM0417-027-002	GL	BLAU10	Gale, 2013	ICP-MS	-22.123	-176.541												84.2309	0.2389	5.3631	39.1189	81.1003	0.1457	133.191	2.1821	1.361	0.5544	14.1531	1.8612	0.6629	0.4798	2.2461	3.9752	0.2185	0.1758	0.371	0.3347	4.2334	38.9311	0.9997	0.8386	4.8698	45.2797	1.362	0.2565	175.512	0.0295	0.325	0.2842
KLM0417-R058	GL	BLAU10	Gale, 2013	ICP-MS	-22.1192	-176.608	52.3257	0.999055	11.1997	6.22919	14.8621	11.1509	2.1279	0.240807	0.105063	0.201648		54.3289	0.3021	5.965	40.949	14.9854	0.099	99.8815	3.3677	2.1111	0.7616	15.1165	2.8017	1.2028	0.7403	2.0131	5.0968	0.3334		0.3252	0.5392	5.6332	36.8251	0.7984	1.0301	3.4797	37.4587	1.9357	0.4492	143.849	0.0461	0.5056	0.158
SHK0845-1	GL	BLAU10	Gale, 2013	ICP-MS	-22.107	-176.606												54.617	0.3421	6.4234	39.0378	39.4232	0.105	100.278	3.6307	2.2882	0.7952	16.0673	2.9822	1.3323	0.7896	2.1941	5.4158	0.3578	0.1759	0.3762	0.5322	6.0468	36.4187	0.9253	1.0993	3.7732	38.3984	2.0621	0.4964	146.963		0.5398	0.1702
KLM0417-R059	GL	BLAU10	Gale, 2013	ICP-MS	-22.104	-176.604	53.7415	1.3628	12.253	4.86013	14.346	9.5105	2.60279	0.309393	0.145378	0.207841		58.4325	0.3612	6.9737	39.3774	10.2069	0.111	89.1791	3.8671	2.4327	0.8486	15.6305	3.2463	1.4244	0.8483	2.3618	5.6458	0.3836		0.2807	0.6571	6.5615	30.0238	0.9349	1.2078	3.9692	35.453	2.2338	0.5376	145.079	0.0546	0.5777	0.1858
SON0067-201-001	GL	BLAU10	HAASE, 2009	ICP-MS	-22.09	-176.52												95.7		8.46	40.3	58.6	0.22	166	2.68	1.63	0.73	15.8	2.39	0.89	0.6	3.3	4.66	0.27		0.36	0.46	6.31	33.1	1.11	1.3	7.94	45.3	1.94	0.44	217	0.03	0.42	0.3
KLM0417-030-001	GL	BLAU10	Gale, 2013	ICP-MS	-22.085	-176.519												109.447	0.3836	8.1693	38.161	38.4878	0.1855	171.012	2.7899	1.7019	0.7549	15.6016	2.5358	0.8977	0.6021	3.3204	4.7238	0.2704		0.3817	0.5399	6.418	25.2724	1.3871	1.2734	8.4469	43.6646	1.9718	0.3807	222.462	0.041	0.4318	0.3573
KLM0417-R061	GL	BLAU10	Gale, 2013	ICP-MS	-22.0762	-176.591	53.8627	1.35654	12.4563	4.69103	14.2892	9.35831	2.63439	0.3092	0.158373	0.22297		61.9724	0.3951	8.3841	38.3598	9.6329	0.1202	82.1024	4.5906	2.9072	0.9985	16.1096	3.894	1.7678	1.0121	2.8348	6.6869	0.4549		0.3197	0.8235	7.9048	24.0057	1.1516	1.4419	4.5135	34.7932	2.6971	0.6983	141.174	0.0644	0.6876	0.2131
KLM0417-017-001	GL	BLAU10	Gale, 2013	ICP-MS	-22.0304	-176.577	53.462	1.22373	11.3999	5.75992	14.5922	9.84702	2.40438	0.30206	0.149331	0.206104		68.5019	0.4102	8.2021	35.9561	20.4688	0.1259	91.2018	4.225	2.6658	0.921	14.7696	3.5694	1.5582	0.9191	2.9406	5.988	0.4219		0.3433	0.6992	7.37	30.7972	0.8601	1.3721	5.4642	35.8919	2.4588	0.5542	151.005	0.055	0.6386	0.2604
KLM0417-R060	GL	BLAU10	Gale, 2013	ICP-MS	-22.0001	-176.567	55.1517	1.60608	12.4319	3.88069	14.1956	8.04331	3.19615	0.352671	0.207101	0.206		66.0436	0.5124	11.3694	33.6684	5.9866	0.1216	52.9661	5.8723	3.7513	1.2605	17.1125	5.0295	2.3366	1.2949	3.8975	7.6775	0.5815		0.8556	1.1808	10.526	13.1605	1.1089	1.9495	5.5453	32.5007	3.5146	0.8476	154.147	0.086	0.8799	0.3072
SON0048-G058-001	GL	BLAU10	LOOCK, 1992; AREVALO JR, 2008	XRF; MS-ID; LA-ICP-MS	-21.98	-176.553	59.134	1.34761	9.57408	2.77568	14.874	6.88891	3.69085	0.442499	0.231307	0.181023		101		13.6	20		0.173	27	7	4.31	1.5		5.73		1.47	5.53		0.63			1.48	13.77		1.45	2.35	7.56	26	4.59		172		0.99	0.401
KLM0417-R069	GL	BLAU10	Gale, 2013	ICP-MS	-21.9417	-176.54	56.8076	1.27849	10.8094	3.69067	14.7816	7.897	3.14584	0.396815	0.199761	0.19926		88.9154	0.5313	11.5167	28.3063	4.9192	0.1659	74.4188	5.7008	3.6395	1.1731	17.2851	4.8646	2.3111	1.2799	4.0478	8.375	0.5869		0.4767	1.0712	10.1843	14.5653	1.2444	1.9417	6.6462	29.4709	3.3788	0.7743	144.584	0.0809	0.8675	0.3439
KLM0417-R068	GL	BLAU10	Gale, 2013	ICP-MS	-21.9137	-176.527	67.9039	0.724494	7.71139	0.843589	13.2592	3.86066	3.06669	0.803196	0.22231	0.190552		173.029	0.8539	22.1911	6.3547	17.5524	0.339	16.8654	9.2716	5.8974	1.7534	19.0344	7.9274	4.2739	2.099	8.1043	13.6777	0.9795		1.0365	2.0261	17.9361	8.0295	2.3066	3.6139	14.7087	17.1853	5.7499	1.3972	146.587	0.1427	1.4515	0.7638
KLM0417-R067	GL	BLAU10	Gale, 2013	ICP-MS	-21.8666	-176.506	53.7614	1.22598	10.7624	4.83135	15.8503	9.78353	2.65273	0.253251	0.12385	0.178861		56.5261	0.4394	8.4773	35.0439	44.0872	0.1127	72.9557	4.8158	3.0694	1.0244	15.2497	3.992	1.831	1.0578	2.8537	6.9701	0.4809		0.2137	0.8834	7.9792	29.2854	0.8885	1.4629	4.5469	36.5458	2.7374	0.6337	137.285	0.0701	0.7095	0.2134
KLM0417-R054	GL	BLAU10	Gale, 2013	ICP-MS	-21.8337	-176.487	54.2785	1.72723	13.0325	4.09871	13.9547	8.38066	3.097	0.312622	0.221557	0.227962		58.8918	0.5477	10.8413	36.7919	6.9002	0.1128	55.3044	5.6642	3.6108	1.2343	17.127	4.8716	2.2813	1.2438	3.7048	7.6014	0.563		0.313	1.1753	10.123	13.7658	1.1688	1.8666	5.3868	33.2884	3.3943	0.8011	153.414	0.0876	0.8631	0.2738
SON0048-G061	GL	BLAU10	PEATE, 2001	ICP-MS; MS-ID	-21.822	-176.442												55.7		5.46	39	181	0.1	103	2.74	1.76	0.63	13.2	2.31	0.89	0.6	2.07		0.28			0.47	4.55	94	0.58	0.87	4.44	37.8	1.58		123	0.046	0.41	0.201
KLM0417-R066	GL	BLAU10	Gale, 2013	ICP-MS	-21.808	-176.481	55.0419	1.82376	13.2067	3.66878	13.7825	7.70698	3.18057	0.366229	0.24545	0.226685		67.5437	0.6053	11.7117	34.5138	5.7739	0.1255	58.6505	6.002	3.7857	1.2852	16.7095	5.0732	2.4657	1.3249	4.072	7.9181	0.5879		0.2703	1.2431	10.771	10.7979	1.0603	1.9964	6.2184	31.8681	3.5993	0.8532	158.475	0.0933	0.8946	0.3109
KLM0417-028-001	GL	BLAU10	Gale, 2013	ICP-MS	-21.783	-176.472	56.4763	1.85597	12.6234	3.21724	13.5757	7.2297	3.19273	0.459491	0.271413	0.208987		88.4162	0.6118	13.4499	29.5841	6.3127	0.1702	49.5703	6.3006	4.0305	1.3707	17.731	5.5124	2.6058	1.385	4.7767	8.4014	0.6269		0.4799	1.3535	12.0049	9.4684	1.152	2.2558	7.9006	29.4039	3.9055	1.1207	154.948	0.0971	0.9586	0.3964
KLM0417-023-001	GL	BLAU10	Gale, 2013	ICP-MS	-21.756	-176.393												47.3373	0.2226	4.6463	36.1264	164.976	0.0953	85.7016	2.5511	1.6357	0.5862	13.52	2.0514	0.8093	0.567	1.6586	3.6529	0.2611	0.1562		0.3562	4.1803	63.349	0.6837	0.7684	3.7417	43.7605	1.4299	0.3042	133.254	0.0305	0.3778	0.142
KLM0417-023-005	GL	BLAU10	Gale, 2013	ICP-MS	-21.756	-176.393												52.3201	0.2607	5.6727	37.4212	209.701	0.1024	106.101	2.6227	1.6258	0.6177	14.1924	2.2281	0.883	0.5693	2.0591	4.0854	0.2609	0.1519	0.1924	0.4019	4.8365	73.1224	0.7613	0.9362	4.8494	42.5398	1.5523	0.3383	140.582	0.0357	0.3913	0.1825
KLM0417-R070	GL	BLAU10	Gale, 2013	ICP-MS	-21.742	-176.459	54.6237	1.83647	13.5837	3.68821	13.6485	8.0773	3.03314	0.344965	0.222374	0.226694		70.8464	0.4541	10.0761	37.6788	2.9535	0.1341	82.7873	5.4439	3.4806	1.1411	17.7942	4.5462	2.1387	1.2244	3.4394	7.9297	0.5606		0.4155	1.0061	9.2011	14.6191	1.2531	1.7287	5.3496	32.5648	3.1619	0.74	144.157	0.0795	0.8174	0.2621
KLM0417-R071	GL	BLAU10	Gale, 2013	ICP-MS	-21.694	-176.441	57.7766	1.38816	10.4879	3.02518	14.9733	7.19626	3.4724	0.418428	0.226361	0.207664		100.563	0.681	13.9362	25.3604	5.5683	0.1924	42.5909	6.7948	4.3546	1.4347	18.1747	5.9027	2.875	1.5	4.8834	9.623	0.689		0.5179	1.3677	12.4964	8.1188	1.306	2.3526	7.9635	27.6707	4.1267	0.9549	148.214	0.0996	1.0354	0.4069
KLM0417-R053	GL	BLAU10	Gale, 2013	ICP-MS	-21.662	-176.429	52.5629	0.75406	8.31401	7.31777	16.3734	12.2231	1.69326	0.130817	0.0755874	0.160346		36.7814	0.2773	4.9537	35.7169	192.114	0.0833	92.6514	3.1821	2.0554	0.6622	12.7977	2.5609	1.0933	0.6926	1.6088	5.0428	0.3228		0.1754	0.487	4.8212	68.8538	0.636	0.8596	2.6393	39.8887	1.6746	0.3726	113.892	0.042	0.4549	0.1191
KLM0417-R072	GL	BLAU10	Gale, 2013	ICP-MS	-21.6	-176.412	57.6699	1.4057	10.114	3.23357	15.0078	7.44748	3.42536	0.414265	0.257254	0.202985		104.192	0.7261	14.0214	23.7543	21.0067	0.1897	41.6008	6.685	4.2889	1.4399	17.8839	5.8387	2.749	1.4743	4.9829	9.0974	0.6684		0.5515	1.3303	12.5448	11.9625	1.3091	2.3625	7.9861	28.4637	4.0829	0.911	155.264	0.0983	1.0177	0.4235
KLM0417-034-002	GL	BLAU10	Gale, 2013	ICP-MS	-21.57	-176.406	57.2516	1.76423	11.9576	3.38352	13.8804	6.8847	3.26587	0.374565	0.253625	0.219483		75.3068	0.6245	14.1419	26.0962	5.486	0.1542	30.2113	7.2453	4.5894	1.4888	17.3302	6.1584	3.0902	1.5779	4.6492	10.333	0.7215		0.4984	1.639	12.9085	3.6858	1.2354	2.4164	7.1242	28.3801	4.264	1.0266	147.496	0.1172	1.0787	0.3571
KLM0417-R052	GL	BLAU10	Gale, 2013	ICP-MS	-21.5	-176.388												97.9873	0.5963	12.4605	30.0908	15.3425	0.1943	51.0149	5.4751	3.435	1.2152	17.0199	4.7171	2.2666	1.1967	4.5417	7.9612	0.5386		0.3103	1.159	10.6435	15.9579	1.2838	2.0418	10.037	33.105	3.3802	0.7698	168.272	0.0861	0.823	0.383
SON0048-G055	GL	BLAU9	PEATE, 2001	ICP-MS; MS-ID	-21.479	-176.38												75.6		11.71	31.8	14	0.13	46	5.52	3.52	1.25	17.2	4.82	2.24	1.2	4.13		0.54			1.17	10.01	15	0.94	1.92	6.97	29.5	3.46		149	0.09	0.85	0.342
KLM0417-R073	GL	BLAU9	Gale, 2013	ICP-MS	-21.458	-176.375	51.7072	0.623097	8.44371	7.7947	16.1374	12.73	1.62604	0.200004	0.0811507	0.159076		46.9635	0.2614	4.4381	37.2343	287.862	0.095	101.359	2.4539	1.5769	0.5626	12.1805	2.0239	0.8088	0.5408	1.6159	4.0591	0.2521	0.1492		0.3977	4.0543	74.0879	0.6151	0.739	3.5888		1.4015	0.3106	118.572	0.0344	0.3657	0.1425
KLM0417-036-003	GL	BLAU9	Gale, 2013	ICP-MS	-21.404	-176.382	53.3404	1.5467	11.6446	4.9416	14.3313	9.312	2.6622	0.2746	0.1728	0.206		54.3685	0.4623	9.0311	35.1328	40.1408	0.1097	64.8493	5.153	3.2499	1.0577	16.0633	4.0063	2.0259	1.1492	3.0271	7.3376	0.5127	0.1928	0.3727	1.0643	8.5646	31.3365	0.9334	1.5719	4.7541	35.3604	2.9398	0.7423	127.56	0.0821	0.7595	0.2107
KLM0417-R074	GL	BLAU9	Gale, 2013	ICP-MS	-21.2852	-176.353	55.5334	1.77265	12.4923	3.64629	13.8897	7.56866	3.30065	0.43573	0.27387	0.233831		76.2265	0.6182	13.7151	30.9477	10.7261	0.1409		6.6732	4.195	1.4628	17.0234	5.729	2.8428	1.4996	4.6684	9.5597	0.6605		0.4174	1.8325	12.4248	14.4103	1.1701	2.3239	7.6394	29.91	3.9474	0.9876	150.459	0.125	0.9983	0.3658
KLM0417-R046	GL	BLAU9	Gale, 2013	ICP-MS	-21.25	-176.339	55.1355	1.7208	12.5519	3.86332	14.069	7.83571	3.20151	0.385741	0.244697	0.214623		94.6233	0.6216	12.9512	33.5857	16.198	0.151		6.5491	4.1433	1.4278	17.6416	5.6178	2.7651	1.4608	4.4087	9.1335	0.6556		0.3833	1.589	11.8389	16.1556	1.2086	2.2039	7.2203	32.0538	3.8463	0.9667	143.727	0.1118	0.983	0.3432
KLM0417-R047	GL	BLAU9	Gale, 2013	ICP-MS	-21.1964	-176.326	59.2728	2.03739	12.5194	1.70539	13.269	6.01154	3.22149	0.485288	0.316145	0.231574		75.7228	0.6648	14.4505	25.4843	7.6914	0.1489	34.6669	7.8386	4.8747	1.5496	19.362	6.5846	3.3092	1.733	4.9056	9.8307	0.7844	0.2163	0.5252	1.8664	13.6801	5.5133	1.4699	2.5047	7.1046	29.5976	4.5916	1.0976	139.878	0.1283	1.1682	0.3515
KLM0417-R048	GL	BLAU9	Gale, 2013	ICP-MS	-21.1564	-176.312	53.8925	1.61917	12.7652	4.30866	14.1167	8.75228	2.96859	0.380359	0.201704	0.227974		142.014	0.5354	10.2444	39.47	2.8172	0.1512	40.7375	5.8719	3.7161	1.1998	18.599	4.9002	2.3727	1.3013	3.3575	8.3984	0.5889		0.3262	1.5012	9.6069	14.2708	1.5874	1.7874	6.03	33.6827	3.3604	0.8578	135.277	0.1066	0.8857	0.241
KLM0417-R049	GL	BLAU9	Gale, 2013	ICP-MS	-21.15	-176.309	53.3849	1.90155	14.3124	4.05977	13.7632	8.31767	3.16443	0.19371	0.171718	0.241208		44.9316	0.5324	10.4929	41.1094	2.187	0.0828	36.4064	6.5304	4.2204	1.3236	17.7086	5.4851	2.6781	1.444	3.2599	9.0478	0.6558		0.3175	1.706	10.4996	7.2878	0.9232	1.8914	3.1695	35.7147	3.6598	0.9367	117.333	0.1191	0.9645	0.1872
KLM0417-R050	GL	BLAU9	Gale, 2013	ICP-MS	-21.1426	-176.306	54.2165	1.7704	13.6449	3.976	13.7643	8.25741	3.02852	0.289463	0.17715	0.242691		62.4176	0.4822	10.1657	37.0497	7.1998	0.121	59.6544	5.7684	3.6445	1.1892	16.1918	4.7813	2.3144	1.2797	3.4939	8.1205	0.5726		0.2807	1.8299	9.593	12.3359	0.965	1.753	5.1008	35.7866	3.3139	0.7958	131.497	0.1261	0.8578	0.2601
KLM0417-R039	GL	BLAU9	Gale, 2013	ICP-MS	-21.1081	-176.29	54.6147	1.85863	13.6227	3.58708	13.8646	7.74836	3.27433	0.304519	0.220008	0.249918		61.029	0.6401	12.6481	34.7907	4.0394	0.1384	37.4336	7.248	4.6291	1.4501	17.0636	6.0826	3.0324	1.597	3.9648	10.0615	0.7337		0.451	1.6155	12.1938	6.1113	1.2579	2.2287	5.3364	34.5596	4.1091	1.086	144.955	0.1187	1.0656	0.2445
KLM0417-R042	GL	BLAU9	Gale, 2013	ICP-MS	-21.104	-176.29	56.2912	1.85134	13.0688	2.94152	13.7537	7.02348	3.34844	0.393404	0.294051	0.244876		73.7731	0.7163	14.2687	29.097	0.6156	0.1598	27.2521	7.7219	4.9782	1.5665	19.824	6.5133	3.3163	1.7182	4.6488	10.1027	0.7732	0.2194	0.5276	1.8255	13.4104	2.3594	1.3251	2.4969	7.1691	31.6466	4.5237	1.1364	153.156	0.1308	1.122	0.2987
KLM0417-013-001	GL	BLAU9	Gale, 2013	ICP-MS	-21.103	-176.287	54.0984	1.54331	13.0144	4.55072	14.2607	8.80187	2.68027	0.187595	0.157328	0.223755		54.3924	0.4096	8.4317	39.2287	7.8856	0.1277		5.5898	3.6099	1.1533	16.3222	4.5881	2.2341	1.2589	2.5402	8.5195	0.5767		0.3844	1.1123	8.6921	18.0536	0.916	1.541	2.8117	40.8133	3.0277	0.7892	118.746	0.0814	0.8234	0.1392
KLM0417-R040	GL	BLAU9	Gale, 2013	ICP-MS	-21.099	-176.285	54.33	1.77243	14.0876	3.79017	13.7534	8.2014	2.90491	0.221389	0.157183	0.252584		58.3432	0.5177	9.1803	38.6726	3.4615	0.1306	51.6341	5.974	3.8913	1.2096	17.3603	4.9923	2.3941	1.3278	2.7613	8.9252	0.6147		0.42	1.1767	9.399	13.5755	0.9076	1.6731	3.0397	38.0613	3.317	0.8006	118.908	0.089	0.8949	0.1485
KLM0417-R041	GL	BLAU9	Gale, 2013	ICP-MS	-21.0958	-176.286	56.9262	1.83694	13.24	2.74841	13.3889	7.02534	3.41039	0.276002	0.286109	0.247981		61.5813	0.6359	12.9839	31.1796	2.7567	0.1378	35.8436	7.9576	5.2579	1.5549	18.4563	6.7972	3.4343	1.7763	3.9216	11.0948	0.8128		0.4915	1.7181	13.1047	6.4357	1.0816	2.35	3.9176	33.2819	4.5457	1.1317	117.694	0.1236	1.2027	0.2144
KLM0417-014-001	GL	BLAU9	Gale, 2013	ICP-MS	-21.0955	-176.286	54.3469	1.56619	13.1786	4.28635	14.0891	8.5484	2.8789	0.21146	0.15038	0.228997		55.0138	0.4998	8.9551	37.2984	5.3165	0.1305	53.6107	5.8576	3.78	1.1615	15.7744	4.823	2.3325	1.3074	2.6583	8.6211	0.5998		0.4	1.1414	9.1443	14.5399	0.9267	1.6266	2.9143	37.6021	3.2237	0.805	113.653	0.085	0.8647	0.1415
KLM0417-R043	GL	BLAU9	Gale, 2013	ICP-MS	-21.0669	-176.273	52.8109	1.3854	12.0337	5.045	14.5572	9.1257	2.8712	0.2233	0.1615	0.2232		51.7202	0.4342	8.845	39.2046	4.8183	0.0997	51.823	5.3125	3.3514	1.0855	16.8552	4.3602	2.0383	1.1785	2.9333	7.4836	0.5334		0.3029	1.7078	8.3764	14.8799	0.8556	1.5415	3.9345	37.7485	2.9367	0.6993	120.321	0.1165	0.7893	0.2104
KLM0417-R045	GL	BLAU9	Gale, 2013	ICP-MS	-21.0321	-176.263	54.0055	1.7699	14.0882	4.0546	13.5929	8.47128	2.88535	0.211162	0.161293	0.245416		56.0753	0.4838	8.5157	38.431	4.0513	0.126	54.3927	5.6525	3.6807	1.1415	16.9558	4.6989	2.2345	1.2637	2.5733	8.3724	0.5826		0.3926	1.0855	8.7262	13.281	0.8599	1.5592	2.8348	39.0222	3.0888	0.7742	115.984	0.0823	0.8377	0.1398
KLM0417-R044	GL	BLAU9	Gale, 2013	ICP-MS	-20.995	-176.253	54.0511	1.87386	14.5432	3.72051	13.5241	8.17283	2.95	0.219945	0.173073	0.244136		57.7475	0.5147	8.9862	39.2541	3.3083	0.1376	56.4284	5.9581	3.8591	1.1898	16.3093	4.896	2.3476	1.3317	2.6671	8.7341	0.6136		0.4319	1.1583	9.1636	10.1065	0.9703	1.6283	2.9578	38.2357	3.2399	0.8448	114.76	0.0869	0.8687	0.1398
KLM0417-R036	GL	BLAU9	Gale, 2013	ICP-MS	-20.934	-176.236	53.0375	1.4084	12.4374	4.8533	14.2215	9.2652	2.6807	0.1946	0.1176	0.2314		42.5028	0.3431	7.3313	38.2393	25.5104	0.0863		4.6445	2.9974	0.9817	15.1854	3.748	1.6684	1.0422	2.3223	7.2694	0.4817		0.2748	0.9391	7.2709	23.5097	0.8092	1.3014	2.9269	38.5491	2.4583	0.5871	153.123	0.0696	0.676	0.1263
KLM0417-R037	GL	BLAU9	Gale, 2013	ICP-MS	-20.883	-176.218	52.6098	1.0291	10.3636	6.1423	15.1354	10.5695	2.1321	0.2013	0.0889	0.19		48.5362	0.3087	6.1492	37.633	40.6082	0.105	90.7403	3.9503	2.5649	0.8233	16.4609	3.2106	1.4146	0.8823	1.9489	6.4904	0.4116	0.188	0.3505	0.7367	6.2249	36.3268	1.0799	1.1029	2.994	39.3008	2.1475	0.5237	138.81	0.0535	0.5805	0.1119
KLM0417-R038	GL	BLAU9	Gale, 2013	ICP-MS	-20.833	-176.208	54.445	1.50235	12.9552	4.26512	14.2177	8.53196	2.86025	0.258322	0.166984	0.211848		70.5628	0.4656	8.2678	37.9658	8.3132	0.151		5.1863	3.3177	1.0873	16.3675	4.2411	2.0739	1.1643	2.523	8.2022	0.5326		0.4178	1.1423	8.3346	21.363	1.0415	1.4922	3.7414	37.2445	2.8292	0.7202	128.317	0.0822	0.7614	0.1489
KLM0417-012-001	GL	BLAU9	Gale, 2013	ICP-MS	-20.797	-176.201	53.4167	1.22693	11.5807	5.60814	14.6601	10.1722	2.30371	0.204087	0.113704	0.207791		40.3897	0.2975	5.791	38.4797	21.7521	0.0999	82.8604	4.077	2.6093	0.8314	16.2945	3.2891	1.4663	0.9032	1.8076	6.4593	0.4201	0.1846	0.2964	0.8233	6.0501	35.4629	0.7117	1.0478	3.0148	38.8252	2.1836	0.5325	115.459	0.0582	0.5951	0.1123
KLM0417-012-002	GL	BLAU9	Gale, 2013	ICP-MS	-20.797	-176.201	54.7816	1.8718	14.3007	3.50313	13.3764	7.8149	3.13284	0.236283	0.176314	0.250751		53.2875	0.4376	9.0864	38.3945	2.8066	0.1136	42.0092	6.0276	3.8612	1.1752	18.9523	4.8837	2.3025	1.3399	2.9697	9.061	0.6256	0.2099	0.4058	1.8877	9.135	6.0428	0.8376	1.6168	3.6946	37.311	3.2165	0.8101	107.862	0.1235	0.8803	0.2081
KLM0417-R110	GL	BLAU9	Gale, 2013	ICP-MS	-20.774	-176.194	54.9505	1.69472	13.2884	3.90469	13.8981	8.09689	2.93308	0.256219	0.166332	0.227929		71.9344	0.4383	9.022	38.0611	4.214	0.1642	86.0332	5.6224	3.666	1.1495	17.045	4.6943	2.3198	1.2541	2.7626	9.277	0.5907		0.5242	1.2682	9.0223	16.0922	1.1467	1.6274	3.7186	36.1653	3.1182	0.7948	122.069	0.0932	0.8335	0.1574
KLM0417-R113	GL	BLAU9	Gale, 2013	ICP-MS	-20.769	-176.19	54.5525	1.48993	12.549	4.12468	14.8078	8.41761	2.9171	0.237426	0.137262	0.211458		69.7892	0.5023	9.2276	37.6542	4.6727	0.161	86.3359	5.7528	3.6592	1.1341	16.9897	4.6995	2.3176	1.2692	2.5644	8.7314	0.5896	0.1986		1.2997	8.6644	16.2813	1.0789	1.5317	3.5514		3.0766	0.8584	122.519	0.0934	0.8309	0.2031
KLM0417-050-001	GL	BLAU9	Gale, 2013	ICP-MS	-20.7686	-176.193	54.2204	1.53718	12.5246	4.24032	14.872	8.52617	2.96974	0.2262	0.134856	0.210825		71.5547	0.4587	8.7093	38.3435	2.5024	0.1673	83.03	5.5281	3.5471	1.1246	18.2857	4.5733	2.2783	1.2308	2.6466	8.3639	0.5705	0.2016	0.5371	1.2075	8.7562	16.1712	1.0254	1.577	3.7695	36.2602	3.0375	0.78	126.588	0.0907	0.8097	0.1504
KLM0417-R083	GL	BLAU9	Gale, 2013	ICP-MS	-20.7683	-176.192	54.3802	1.50227	12.5173	4.32732	14.6346	8.53645	2.94947	0.232557	0.148941	0.223813		69.5075	0.4232	8.8529	37.5501	5.1415	0.1627	81.8354	5.542	3.5454	1.1184	17.4187	4.5387	2.2482	1.2462	2.7193	8.6731	0.5754		0.4599	1.215	8.7729	18.9177	1.2005	1.6057	3.6689	36.3493	3.0784	0.771	126.305	0.0904	0.8239	0.154
KLM0417-R112	GL	BLAU9	Gale, 2013	ICP-MS	-20.768	-176.193	54.5229	1.53242	12.9185	4.16104	14.3216	8.40287	2.9313	0.255974	0.144124	0.228541		68.2432	0.4632	8.4945	36.6504	3.9788	0.1628	80.0343	5.3266	3.3991	1.0777	16.5057	4.3859	2.1533	1.187	2.6095	8.3191	0.5501	0.1948	0.5511	1.108	8.5218	16.5785	1.1056	1.5292	3.5618	34.8565	2.9413	0.7629	120.687	0.0839	0.778	0.152
KLM0417-R108	GL	BLAU9	Gale, 2013	ICP-MS	-20.762	-176.189	54.99	1.65532	12.9898	3.89655	14.1533	8.05689	3.00724	0.260266	0.163823	0.238644		73.7832	0.5135	9.211	37.3072	2.225	0.1744	79.6351	5.7831	3.7493	1.1739	18.4923	4.7966	2.3949	1.2842	2.7894	8.4694	0.5964	0.2045	0.5597	1.3112	9.1602	14.76	1.1595	1.6528	3.9269	35.6826	3.2071	0.8246	127.726	0.0966	0.844	0.1574
KLM0417-051-001	GL	BLAU9	Gale, 2013	ICP-MS	-20.7584	-176.193	54.8759	1.77105	13.3452	3.77115	13.8584	8.15437	2.95666	0.271328	0.164371	0.228242		72.0608	0.4725	9.0665	38.0463	7.006	0.1748		5.6595	3.6447	1.1932	16.8117	4.6905	2.3147	1.2742	2.755	9.1546	0.585		0.4617	1.2663	9.0796	15.8512	1.0708	1.6293	3.784	36.6449	3.104	0.8289	128.29	0.092	0.8372	0.1587
KLM0417-R086	GL	BLAU9	Gale, 2013	ICP-MS	-20.7583	-176.19	54.7025	1.76326	13.6132	3.894	13.6961	8.27694	2.84189	0.249641	0.165356	0.224326		54.6938	0.4409	8.1671	37.6713	3.5094	0.1176	62.9422	5.5239	3.5624	1.1116	18.1631	4.5241	2.1788	1.2303	2.5459	8.12	0.5652	0.203	0.5774	1.1876	8.2938	13.7582	0.8676	1.4902	3.6116	35.6	2.9806	0.7164	112.989	0.0889	0.8067	0.1579
KLM0417-CT11-6	GL	BLAU9	Gale, 2013	ICP-MS	-20.7568	-176.188												72.1967	0.4887	8.9345	39.4319	4.826	0.1734	93.921	5.5553	3.5832	1.1348	17.4063	4.6169	2.2598	1.243	2.6691	8.7437	0.5775	0.2015		1.2362	8.8751	17.5394	1.2122	1.5872	3.6939		3.0461	0.8114	127.488	0.0924	0.8175	0.1478
KLM0417-R109	GL	BLAU9	Gale, 2013	ICP-MS	-20.756	-176.186	53.8104	1.62303	13.3881	4.20936	14.426	8.46612	2.9815	0.202223	0.155928	0.236616		61.1645	0.5111	9.678	39.5835	3.1202	0.1371	58.5518	6.1172	3.9041	1.2215	16.9917	5.0198	2.5208	1.3516	2.9515	9.2174	0.6262		0.4905	1.3445	9.5984	15.9142	1.068	1.749	3.4958	36.2554	3.3709	0.9119	123.469	0.0968	0.8895	0.1632
KLM0417-R035	GL	BLAU9	Gale, 2013	ICP-MS	-20.753	-176.187	54.9348	1.7703	13.4224	3.71715	13.9798	7.94	2.99255	0.242941	0.199383	0.238414		62.8749	0.5487	10.3705	37.0979	3.3557	0.1434	56.8399	6.5047	4.1442	1.2776	17.005	5.3038	2.7219	1.4331	3.1441	9.8119	0.6611		0.4453	1.4981	10.2841	15.4485	1.1933	1.8764	3.4327	34.3715	3.6085	0.938	121.212	0.1065	0.9452	0.1736
KLM0417-R034	GL	BLAU9	Gale, 2013	ICP-MS	-20.752	-176.186	54.4235	1.72748	13.2215	3.97242	14.2028	8.2099	3.09088	0.225528	0.152592	0.236162		61.8989	0.5292	9.8498	37.6729	4.2784	0.1359	56.6822	6.2446	4.0515	1.2415	18.9343	5.162	2.6211	1.3971	3.0009	9.2178	0.6345	0.2026	0.5429	1.3878	10.0047	16.8668	1.1181	1.796	3.2936	35.326	3.4612	0.9496	118.871	0.1031	0.9242	0.1646
KLM0417-R033	GL	BLAU9	Gale, 2013	ICP-MS	-20.734	-176.184	53.1532	1.68708	14.0384	4.52879	13.9824	8.72795	2.83133	0.187801	0.133668	0.249897		54.2456	0.461	8.6505	42.4499	5.2534	0.1201	62.2608	5.7866	3.7107	1.1586	16.195	4.736	2.2852	1.282	2.562	8.7535	0.5916		0.4644	1.172	8.8844	16.499	1.0114	1.5822	2.7508	38.2626	3.1152	0.8993	110.005	0.0891	0.8322	0.1354
KLM0417-R089	GL	BLAU9	Gale, 2013	ICP-MS	-20.726	-176.179	53.1753	1.70239	14.0771	4.49319	13.9126	8.70429	2.88214	0.186914	0.149208	0.238834		54.77	0.4511	8.603	42.8679	4.4561	0.124	61.9766	5.7515	3.6659	1.1421	16.7142	4.6855	2.2982	1.2692	2.5923	8.5184	0.5879		0.3639	1.193	8.7362	17.757	0.9416	1.563	2.7704	39.1329	3.1293	0.801	116.55	0.092	0.8317	0.1396
KLM0417-R085	GL	BLAU9	Gale, 2013	ICP-MS	-20.718	-176.193	52.8728	1.303	11.3638	5.0141	15.1169	9.3537	2.6589	0.1985	0.1373	0.1842		49.847	0.3924	7.8921	37.8049	6.5112	0.1162	63.9607	5.08	3.2568	1.0383	15.9187	4.1615	1.9676	1.1248	2.5099	7.8031	0.5212		0.3882	1.222	7.8574	23.6806	0.9246	1.4067	3.4597	35.9017	2.7982	0.6793	121.721	0.0878	0.7373	0.1619
KLM0417-R088	GL	BLAU9	Gale, 2013	ICP-MS	-20.712	-176.176	52.2024	0.9832	9.9705	6.5	15.3251	10.9197	2.1093	0.1684	0.1065	0.1866		38.4308	0.2715	5.1202	39.0919	147.711	0.0892	89.3851	3.6995	2.3873	0.7593	13.5416	2.9902	1.3105	0.825	1.5764	5.6881	0.3797		0.3319	0.6916	5.3316	54.7081	0.6728	0.9302	2.5459	41.7417	1.9462	0.4611	103.607	0.0537	0.5387	0.1007
KLM0417-R082	GL	BLAU9	Gale, 2013	ICP-MS	-20.7	-176.175	53.708	1.66823	13.48	4.39547	14.118	8.71464	2.77318	0.213089	0.173085	0.238318		42.0003	0.3694	7.5049	41.1206	12.4798	0.0961	57.1577	5.3916	3.3866	1.065	18.0871	4.3682	2.0608	1.1863	2.3281	7.7518	0.5409	0.209	0.3118	1.1145	7.7906	16.5568	0.7641	1.4243	3.1681	38.6281	2.8732	0.6876	109.379	0.0827	0.7894	0.1342
KLM0417-R084	GL	BLAU9	Gale, 2013	ICP-MS	-20.698	-176.186	54.5309	1.57356	12.4939	4.4006	14.2606	8.62478	2.91989	0.243458	0.183778	0.206259		50.2652	0.4174	8.7091	36.6087	7.5106	0.1178	48.3171	5.4429	3.4975	1.091	16.5865	4.5573	2.1877	1.2054	2.7976	8.2026	0.5552		0.3489	1.496	8.6612	22.2583	0.9203	1.5532	3.5895	35.315	2.9896	0.697	118.065	0.1065	0.8024	0.1855
KLM0417-042-001	GL	BLAU9	Gale, 2013	ICP-MS	-20.658	-176.177	52.3388	1.0913	10.1779	6.1089	14.9374	10.7025	2.2363	0.1809	0.0952	0.2042		40.3748	0.3265	5.9119	36.0716	82.7345	0.0902		3.9253	2.5122	0.8253	14.0619	3.1969	1.4284	0.8739	1.8615	5.8824	0.3969		0.2561	0.848	5.9924	54.2732	0.6892	1.0687	2.7141	39.2906	2.108	0.4777	118.086	0.0632	0.5775	0.1216
KLM0417-R087	GL	BLAU9	Gale, 2013	ICP-MS	-20.634	-176.169	51.1814	0.8458	9.4707	7.2171	15.602	11.87	1.8791	0.1585	0.0832	0.1699		36.7657	0.2	4.6387	38.7085	138.735	0.0876	99.9143	3.0484	1.9492	0.6438	12.7476	2.473	1.0548	0.677	1.5062	4.9157	0.3101		0.3247	0.6505	4.666	61.0839	0.6898	0.8238	2.6461	40.8158	1.6473	0.3894	105.462	0.0498	0.4474	0.1043
KLM0417-R081	GL	BLAU9	Gale, 2013	ICP-MS	-20.617	-176.165	51.2586	0.8849	9.5709	7.0358	15.4933	11.8068	1.8731	0.1623	0.09	0.1797		37.6624	0.2286	4.7676	38.9517	107.205	0.0881	95.1073	3.0707	1.9514	0.6493	13.3467	2.4833	1.0478	0.6726	1.5647	4.9226	0.305		0.2318	0.6293	4.7356	58.7463	0.7381	0.8416	2.6974	39.2943	1.6566	0.411	106.814	0.0493	0.4532	0.1065
KLM0417-R080	GL	BLAU9	Gale, 2013	ICP-MS	-20.592	-176.163	51.1942	0.8878	8.7028	7.2263	15.8916	12.0713	2.0449	0.1115	0.0975	0.1621		20.4495	0.247	5.3633	42.5251	255.834	0.0475	82.9541	3.3513	2.1118	0.7091	13.0484	2.7491	1.1822	0.7296	1.6844	4.9716	0.3297		0.1552	0.6702	5.3742	120.305	0.5693	0.9478	2.1647	38.5104	1.8577	0.4342	131.472	0.0528	0.495	0.097
DAR0033-025-002-1	WR	BLAU9	PEARCE, 1995	AAS; ICP-MS	-20.583	-176.143	52.6	1.94	13.086	4.13	13.92	8.3	3.08	0.32	0.17	0.23		34.5		12.91	34	7		42	7.5	5.13	1.58		6.36	3.18	1.71	3.7	8	0.78			2.14	12.44	10	1.12	2.21	4.2	35	4.58		113	0.14	1.14	0.27
DAR0033-025-005-1	WR	BLAU9	PEARCE, 1995	AAS; ICP-MS	-20.583	-176.143	51.3	0.96	9.279	6.5	15.93	11.29	2.11	0.17	0.08	0.17		40.7		6.13	35	116		90	3.86	2.32	0.86		2.9	1.41	0.86	1.91	6	0.44			0.69	6.17	55	1.3	1.08	2.8	34	2.24		119	0.04	0.56	0.08
KLM0417-R032	GL	BLAU9	Gale, 2013	ICP-MS	-20.582	-176.16	50.9874	1.233	10.5232	5.9634	15.2741	10.9579	2.6361	0.32	0.2145	0.1978		21.7652	0.5093	8.12	36.569	156.719	0.0572	110.463	3.9909	2.4884	0.9415	13.9258	3.4471	1.5666	0.8733	2.6337	6.3024	0.3904		0.1895	1.0661	7.7677	61.1133	0.9578	1.433	4.1712	37.1468	2.5551	0.5852	279.689	0.0777	0.6122	0.1459
KLM0417-041-001	GL	BLAU8	Gale, 2013	ICP-MS	-20.534	-176.206	48.8835	1.26995	8.27147	9.35632	16.4154	11.9381	2.45847	0.339863	0.204656	0.151272		105.11	0.7092	20.7491	43.9954	447.097	0.0992	75.3625	4.3103	2.5795	1.1628	15.7965	4.0327	2.3279	0.9076	9.3588	4.889	0.3897	0.1504	0.6699	14.8067	12.6434	189.224	0.9181	2.8064	9.2178	34.2241	3.147	0.8054	193.243	0.8309	0.6835	1.0683
KLM0417-R099	GL	BLAU8	ESCRIG, 2009; GALE, 2013; MICHAEL, 2015	ICP-MS	-20.431	-176.172	49.834	0.884314	9.03977	9.09943	15.7234	12.8746	2.05639	0.0214156	0.0602625	0.174213	0.148	4.4998	0.2992	4.7944	45.3168	396.858	0.0074	107.971	3.8261	2.457	0.7647	12.3703	3.0111	1.3259	0.8504	1.3483	4.9504	0.3881		0.2304	0.6515	5.1795	116.576	0.3843	0.8936	0.5266	42.6799	1.9127	0.4802	83.423	0.0501	0.5487	0.063
KLM0417-R106	GL	BLAU8	Gale, 2013	ICP-MS	-20.428	-176.153	51.4821	1.06003	9.90863	7.37528	15.0521	12.1679	2.28386	0.0760983	0.0913382	0.189539		15.1539	0.3165	6.131	41.2514	137.047	0.0318	101.811	4.3273	2.7761	0.8792	13.668	3.5254	1.6442	0.9576	1.8022	5.6831	0.4333		0.1833	0.9669	6.433	60.249	0.5207	1.13	1.1055	42.9859	2.3098	0.5532	88.3746	0.0711	0.6332	0.093
KLM0417-R098	GL	BLAU8	Gale, 2013	ICP-MS	-20.416	-176.167	50.9248	0.677571	8.23551	9.05537	15.7561	12.9524	1.79441	0.0772871	0.0626952	0.148637		14.5186	0.2787	4.167	41.7333	399.883	0.0304	91.3067	2.9794	1.8824	0.628	11.6674	2.3862	1.0692	0.6576	1.2115	4.3415	0.2969		0.0843	0.4282	4.4026	121.537	0.4708	0.7615	1.2683	40.9047	1.5859	0.3835	95.246	0.0375	0.4348	0.0633
KLM0417-010-001	GL	BLAU8	Gale, 2013	ICP-MS	-20.383	-176.155	50.8169	0.949346	8.84417	8.00015	16.173	12.3797	2.17748	0.0887965	0.0720652	0.166304		14.621	0.3124	5.1819	41.3375	307.597	0.0318	94.9739	3.6353	2.3024	0.7822	15.0254	3.021	1.3509	0.8011	1.4861	5.1167	0.357	0.1705	0.1249	0.5235	5.6984	108.232	0.4749	0.9744	1.3825	40.8684	2.0085	0.5105	119.11	0.042	0.5354	0.0711
KLM0417-R077	GL	BLAU8	Gale, 2013	ICP-MS	-20.364	-176.155	51.2675	1.01702	9.37653	7.88014	15.3482	12.3921	2.02285	0.0907513	0.0854071	0.184528		16.724	0.3212	5.6568	41.058	356.607	0.0266	98.7142	3.9781	2.5589	0.7912	15.0815	3.2371	1.5003	0.8883	1.6774	5.3486	0.403	0.1677	0.2126	0.7588	5.8828	97.6959	0.5235	1.0379	1.4011	42.2439	2.1102	0.5283	88.4211	0.0602	0.5842	0.0893
KLM0417-R076	GL	BLAU8	Gale, 2013	ICP-MS	-20.358	-176.151	51.3258	0.997535	9.15795	7.73906	15.6041	12.3925	2.07057	0.0983826	0.0928385	0.174891		17.1261	0.2895	5.4875	39.6975	286.403	0.0412	86.113	3.8136	2.4486	0.7786	13.2608	3.1199	1.4052	0.8446	1.6117	5.1641	0.3876		0.1541	0.5881	5.7029	78.9321	0.4762	0.9973	1.641	42.6909	2.0525	0.5128	103.466	0.0509	0.5644	0.0834
KLM0417-R028	GL	BLAU8	Gale, 2013	ICP-MS	-20.349	-176.149	49.86	0.884695	9.30589	9.02563	15.2782	13.0751	2.09815	0.0184978	0.0495941	0.176479	0.11	3.5756	0.2106	4.3071	45.7237	390.544	0.003	108.999	3.8524	2.4308	0.7445	14.7423	2.9758	1.3133	0.8587	1.2224	5.1094	0.3859	0.1708	0.0678	0.6021	4.7751	104.281	0.2646	0.8362	0.4005	42.5457	1.884	0.436	73.0833	0.0501	0.556	0.0518
KLM0417-R029	GL	BLAU8	GALE, 2013; MICHAEL, 2015	ICP-MS	-20.34	-176.148	50.0391	0.873828	9.33519	8.81201	15.3793	13.0056	2.07711	0.0193034	0.0529351	0.176517	0.118	5.4708	0.2449	4.6476	45.3736	378.937		105.41	3.8804	2.4971	0.7651	14.955	3.0943	1.334	0.8628	1.3168	5.0194	0.3941	0.1676	0.1867	0.6249	5.0498	105.714	0.552	0.8694	0.4848	42.3467	1.9318	0.5319	73.4634	0.052	0.5586	0.063
KLM0417-R024	GL	BLAU8	Gale, 2013	ICP-MS	-20.333	-176.143	50.4855	0.9654	9.3188	7.5791	15.3379	12.2095	2.0785	0.0844	0.0627	0.1726		15.081	0.2689	5.5314	42.8254	337.754	0.0317	90.9444	3.9979	2.5337	0.787	13.5495	3.2271	1.459	0.882	1.6301	5.2654	0.4029		0.1633	0.7293	5.8109	105.387	0.5335	1.0163	1.3206	41.4408	2.1069	0.5109	88.6785	0.0573	0.5853	0.0825
KLM0417-R025	GL	BLAU8	Gale, 2013	ICP-MS	-20.33	-176.143	50.5179	0.971654	9.42476	8.21677	15.2856	12.7576	2.24205	0.0578738	0.0697712	0.169891		8.1344	0.2393	5.4707	43.4073	344.516	0.0195	102.133	3.9433	2.5318	0.811	13.203	3.2028	1.4174	0.8801	1.6573	5.2316	0.393		0.0997	0.8335	5.7112	93.3574	0.305	0.996	1.089	42.6805	2.0722	0.4864	89.1051	0.0641	0.5792	0.0884
KLM0417-R026	GL	BLAU8	Gale, 2013	ICP-MS	-20.324	-176.141	51.2528	0.9965	10.1555	6.3405	15.1403	11.2883	2.2701	0.1494	0.0818	0.1799		25.4531	0.2647	5.9783	40.8827	55.9595	0.0565	71.5527	3.8835	2.4664	0.804	13.9015	3.1452	1.431	0.8561	1.9123	5.5457	0.3897		0.1677	1.1418	5.9526	48.2746	0.7358	1.0606	2.2696	39.6019	2.0681	0.5016	101.01	0.0819	0.5698	0.1267
KLM0417-CT02-4	GL	BLAU8	Gale, 2013	ICP-MS	-20.321	-176.139																																											4.1545
KLM0417-R097	GL	BLAU8	Gale, 2013	ICP-MS	-20.317	-176.137	51.2643	0.989353	9.33377	7.75924	15.3967	12.5025	2.08939	0.0785456	0.0901969	0.178686		15.0454	0.2738	5.4685	44.9756	325.861	0.0309	90.62	3.8786	2.4628	0.77	13.1405	3.0943	1.4101	0.8777	1.6224	5.2294	0.384	0.1742	0.1674	0.6524	5.6351	124.701	0.5016	0.9927	1.2566	40.657	2.0513	0.5149	87.4026	0.0533	0.562	0.0877
KLM0417-011-002	GL	BLAU8	Gale, 2013	ICP-MS	-20.316	-176.135	51.1203	0.999098	9.47717	7.76714	15.3524	12.5176	2.09432	0.0890426	0.0855011	0.165538		15.2387	0.2986	5.6337	43.9045	333.252	0.0378	93.2757	3.9912	2.5582	0.7982	12.8871	3.247	1.4659	0.8967	1.7058	5.4697	0.4016	0.1678		0.7399	5.8528	118.195	0.3872	1.024	1.3015		2.1332	0.5246	86.2846	0.0582	0.5917	0.0884
KLM0417-053-001	GL	BLAU8	Gale, 2013	ICP-MS	-20.311	-176.133	51.2836	1.03681	9.3986	7.72065	15.3908	12.4249	2.04578	0.0875696	0.080104	0.201067		14.9819	0.2712	5.6372	42.3191	333.161	0.031		4.0346	2.5884	0.8098	12.6194	3.2603	1.4882	0.8979	1.671	5.2424	0.4057		0.1693	0.7526	5.8955	97.108	0.4593	1.0419	1.3122	41.9863	2.122	0.5156	85.5468	0.0592	0.5873	0.0863
KLM0417-R075	GL	BLAU8	Gale, 2013	ICP-MS	-20.3	-176.132	51.2538	1.03126	9.82254	7.80081	15.0186	12.2307	2.19584	0.0634931	0.0932303	0.195		10.8368	0.2981	5.5956	43.1587	237.641	0.0231	90.1465	4.2429	2.7659	0.833	13.7839	3.3969	1.5197	0.9413	1.6086	5.748	0.4331		0.1316	0.6516	5.9166	75.468	0.4455	1.0326	1.0908	44.1853	2.2112	0.5216	88.4744	0.0559	0.6202	0.0751
KLM0417-R107	GL	BLAU8	Gale, 2013	ICP-MS	-20.285	-176.118	50.3051	1.01775	9.70713	8.43296	15.1572	12.7433	2.10591	0.0372604	0.0629019	0.174683		6.6946	0.3103	5.5204	46.6337	376.902	0.0087	110.502	4.2531	2.7175	0.8367	13.6714	3.397	1.4988	0.9463	1.612	5.395	0.4261	0.1791	0.0778	0.7812	5.8421	103.394	0.3798	1.0191	0.5487	42.9531	2.1499	0.5117	79.4888	0.0612	0.621	0.0835
KLM0417-R031	GL	BLAU8	Gale, 2013	ICP-MS	-20.247	-176.111	50.625	1.03483	10.0922	8.12692	15.0499	12.4032	2.04409	0.0560422	0.0889083	0.194799		10.4445	0.284	5.9057	44.1464	303.464	0.0167	89.8127	4.506	2.8866	0.8444	13.108	3.5637	1.6285	1.0063	1.7649	5.8421	0.457		0.2192	1.0871	6.1926	94.1609	0.4505	1.0863	1.0589	42.6807	2.2613	0.6087	78.9838	0.0793	0.6442	0.098
WASRNDB-007-005	GL	BLAU	HAHM, 2012; HANAN, 2013; TIAN, 2008	EMP; ICPMS; ICP-OES; MC-ICP-MS; MS; SIMS	-20.22	-176.11	51.68	1.58	12.27	5.93	14.21	10.46	2.54	0.11	0.13	0.24	0.95	14.15		9.58		76			5.47	3.71	1.28				1.21	2.87					1.73	9.6	44.4	0.74	1.61	1.93		3.24		102.61	0.15	0.82	0.16
KLM0417-R013	GL	BLAU8	Bezos et al., 2009	ICP-MS	-20.155	-176.144	51.2605	0.874923	9.1593	8.03114	15.336	12.7992	1.95644	0.0579186	0.0685958	0.169727	0.951	9.8432	0.2366	4.5576	41.3692	323.035	0.01	90.4394	3.6428	2.3315	0.7169	14.706	2.8948	1.2718	0.8075	1.3004	5.0564	0.3768	0.1634	0.1164	0.6203	4.9369	92.4618	0.4	0.8541	0.8174	41.9302	1.8322	0.4473	85.0966	0.0537	0.5278	0.0627
KLM0417-009-001	GL	BLAU8	Gale, 2013	ICP-MS	-20.122	-176.058												22.0227	0.5003	8.9204	42.44	1.3964	0.0219	178.314	5.8372	3.7292	1.2817	19.4231	4.8319	2.1292	1.2916	2.6346	8.0542	0.5914	0.2441	0.2198	1.2689	9.4365	12.6699	0.7478	1.7025	2.3536	31.8371	3.2734	0.7723	205.631	0.091	0.8638	0.1148
KLM0417-009-005a	GL	BLAU8	Gale, 2013	ICP-MS	-20.122	-176.058												13.801	0.3413	5.2963	42.6292	141.038	0.0129	112.269	3.5645	2.2615	0.8166	13.9505	2.83	1.1962	0.8012	1.5578	4.7673	0.3538	0.1823	0.1517	0.67	5.6637	58.1037	0.5051	0.9898	1.2725	43.797	2.0009	0.4926	192.309	0.0516	0.52	0.0778
KLM0417-009-005b	GL	BLAU8	Gale, 2013	ICP-MS	-20.122	-176.058												13.0824	0.2748	5.072	42.9175	145.898	0.0108	107.172	3.4756	2.2017	0.8009	14.5899	2.7215	1.1671	0.7712	1.4848	4.6376	0.3442	0.1762		0.6787	5.4466	66.6258	0.4576	0.941	1.2342	46.1759	1.9314	0.4672	185.372	0.0513	0.5141	0.063
KLM0417-R015	GL	BLAU	BEZOS, 2009	EMP; FTIR; ICPMS	-20.104	-176.14	50.49	0.8	8.63	8.28	15.62	12.66	1.9	0.072	0.059	0.16	1.175	11.7		4.23	41.5	344	0.024	90	3.42	2.19	0.67	13.9	2.72	1.22	0.76	1.24	4.92	0.35			0.58	4.63	115	0.38	0.82	1.02	40	1.75	0.41	92	0.048	0.5	0.058
KLM0417-R124	GL	BLAU7	Bezos et al., 2009	ICP-MS	-20.096	-176.133	50.5283	0.7381	8.1238	8.4705	15.7303	12.8151	1.708	0.0878	0.0717	0.137	1.574	14.2308	0.1934	3.7342	42.8834	402.68	0.0302	92.4093	2.9405	1.8707	0.5889	13.322	2.3414	1.0218	0.6496	1.1089	4.5238	0.3029	0.1574	0.0963	0.4706	4.045	136.429	0.5066	0.7064	1.1601	39.5926	1.4878	0.353	96.6267	0.0417	0.4296	0.0535
DAR0033-024-001-1	WR	BLAU8	PEARCE, 1995	AAS; ICP-MS	-20.092	-176.087	51.1	1	9.612	7.48	14.96	12.03	1.92	0.03	0.07	0.17		9.1		5.03	42	246		89	4.01	2.72	0.76		2.88	1.33	0.9	1.51	7	0.44			0.67	5.09	68	0.55	0.92	0.68	38	2.04		61	0.04	0.58	0.06
KLM0417-R017	GL	BLAU7	Bezos et al., 2009	ICP-MS	-20.085	-176.141	51.132	1.05896	10.2745	7.88132	14.4736	12.3886	2.24345	0.0337082	0.0555135	0.207751	0.221	5.1169	0.2769	5.0826	44.2484	298.781	0.0084	94.9864	4.4743	2.8956	0.8406	12.149	3.5223	1.5485	0.9945	1.4143	5.7862	0.4564		0.1338	0.786	5.7531	81.8077	0.3893	0.963	0.5467	45.5212	2.2181	0.596	65.8231	0.0625	0.6437	0.0587
KLM0417-R016	GL	BLAU7	Bezos et al., 2009	ICP-MS	-20.083	-176.136	50.937	0.9564	9.4344	6.8739	15.5147	11.8227	2.2759	0.1162	0.0763	0.1854	1.62	15.5412	0.3292	5.3995	39.7615	92.3657	0.033	75.5058	3.7651	2.4324	0.7748	13.4672	3.0387	1.3514	0.8377	1.5902	5.6224	0.3932		0.138	0.5542	5.6453	59.7948	0.556	0.9895	1.6529	40.1083	2.0205	0.5013	125.738	0.0486	0.5526	0.0786
KLM0417-R023	GL	BLAU7	Bezos et al., 2009	ICP-MS	-20.071	-176.137	51.4629	1.04316	10.469	7.91557	14.406	12.0415	2.12962	0.0371661	0.0566531	0.183018	0.239	5.829	0.2826	5.1619	45.576	196.722	0.0002	89.8482	4.4099	2.8729	0.8118	15.6863	3.4569	1.5262	0.9911	1.4673	6.1628	0.4596	0.1818	0.1885	0.7867	5.6747	74.1007	0.3331	0.9704	0.683	43.2301	2.1582	0.5517	65.0442	0.0641	0.6348	0.068
KLM0417-002-001	GL	BLAU7	Bezos et al., 2009	ICP-MS	-20.07	-176.132	51.1411	0.8035	8.5958	7.3205	15.8263	12.3635	1.9021	0.1001	0.0746	0.1679	1.461	14.906	0.2714	4.6283	38.9208	264.561	0.0309	88.9835	3.354	2.1536	0.694	11.6186	2.7175	1.1879	0.7428	1.3773	5.0432	0.3456		0.1331	0.5483	4.9517	79.4591	0.4988	0.8543	1.3142	41.0815	1.7669	0.4346	119.764	0.0448	0.4939	0.0644
KLM0417-R019	GL	BLAU7	Bezos et al., 2009	ICP-MS	-20.07	-176.129	51.0724	0.8548	8.8267	7.3316	15.5032	12.2405	1.9659	0.1049	0.0676	0.1669	1.499	14.6861	0.216	4.6191	38.6951	230.024	0.0336	92.723	3.3548	2.1515	0.6894	12.602	2.7106	1.1579	0.7483	1.3678	5.0209	0.3406		0.1201	0.5261	4.8727	77.2971	0.4115	0.8491	1.3716	39.9481	1.7575	0.4643	114.055	0.0461	0.4931	0.0706
KLM0417-R021	GL	BLAU7	Bezos et al., 2009	ICP-MS	-20.063	-176.131	51.1396	0.8317	8.7707	7.4371	15.5349	12.4137	1.9626	0.1027	0.0651	0.1705	1.686	15.1894	0.2936	4.631	38.7743	244.832	0.0302	91.2294	3.3606	2.1711	0.6859	12.1564	2.7628	1.1884	0.7561	1.355	4.9709	0.3418		0.0882	0.5617	4.9424	76.8016	0.9024	0.8586	1.3278	40.3412	1.7926	0.4223	116.15	0.0471	0.4959	0.0725
KLM0417-R092	GL	BLAU7	Bezos et al., 2009	ICP-MS	-20.06	-176.133	50.9372	0.9751	9.4274	6.872	15.5876	11.9608	2.2197	0.1071	0.072	0.1967		15.5678	0.3209	5.2442	38.8958	120.784	0.0343	83.4945	3.6742	2.3688	0.7472	13.1227	2.9476	1.3286	0.8168	1.5212	5.3248	0.3772	0.1647		0.6204	5.3929	58.2995	0.4905	0.9435	1.4154		1.913	0.5107	116.244	0.05	0.5369	0.0693
KLM0417-052-001	GL	BLAU7	Bezos et al., 2009	ICP-MS	-20.059	-176.133	51.3458	1.05058	10.6707	7.79689	14.5146	11.8825	2.13362	0.0485915	0.0871642	0.196771	0.333	6.8339	0.306	5.5536	45.4628	154.241	0.0081		4.4567	2.9231	0.854	13.1234	3.5154	1.585	0.9992	1.5773	6.1188	0.4652		0.1602	0.7756	6.0496	69.2197	0.392	1.0357	0.7232	43.6591	2.2292	0.5679	70.0174	0.0615	0.6445	0.0723
KLM0417-CT10-1	GL	BLAU7	Bezos et al., 2009	ICP-MS	-20.053	-176.131												7.6218	0.3312	6.0467	46.1046	99.8977	0.0149	87.062	4.8264	3.1214	0.8983	14.2858	3.8055	1.7143	1.0771	1.7347	6.6759	0.4967	0.1919		0.8334	6.4847	58.4597	0.3915	1.1168	0.7891		2.4111	0.6181	71.0369	0.0664	0.6912	0.0747
KLM0417-R090	GL	BLAU7	Bezos et al., 2009	ICP-MS	-20.053	-176.126	51.1434	0.818	8.6681	7.4385	15.6397	12.4418	1.9249	0.101	0.085	0.1549	1.516	14.963	0.2329	4.3799	39.1611	260.343	0.0299	90.5983	3.3158	2.1121	0.6806	13.8114	2.6738	1.178	0.7352	1.3168	4.819	0.3356	0.1592	0.1052	0.5405	4.6754	87.036	0.467	0.8264	1.3615	39.939	1.7412	0.4093	112.869	0.0467	0.4756	0.0634
KLM0417-R091	GL	BLAU7	Bezos et al., 2009	ICP-MS	-20.053	-176.132	51.6067	1.1761	11.2946	7.4133	14.2487	11.3874	2.23424	0.0530272	0.0907465	0.21561		7.4975	0.2997	5.9271	46.2422	88.9339	0.0131	83.9665	4.8406	3.1729	0.8986	14.1535	3.8274	1.7521	1.0815	1.6737	6.7746	0.5081		0.1196	0.8514	6.4895	56.9296	0.4591	1.1134	0.8306	43.4804	2.4049	0.6039	68.8551	0.0681	0.699	0.0733
KLM0417-R116	GL	BLAU7	Bezos et al., 2009	ICP-MS	-20.053	-176.131	50.7491	0.8906	8.7607	7.3129	16.102	12.2964	1.9195	0.098	0.0945	0.1673	1.613	11.7818	0.2388	4.7439	38.8056	147.464	0.0201	85.256	3.5611	2.2699	0.7164	14.2647	2.8772	1.3082	0.7963	1.4373	5.2177	0.3591	0.1607	0.1115	0.6156	5.1162	85.8356	0.4445	0.9205	1.2619	37.9154	1.8752	0.4434	132.307	0.0512	0.5213	0.0652
KLM0417-R022	GL	BLAU7	Bezos et al., 2009	ICP-MS	-20.043	-176.123	50.6099	0.7924	8.4589	7.4893	15.7998	12.5033	1.9179	0.0955	0.0549	0.1632	1.433	14.3535	0.2174	4.5535	39.4829	266.858	0.0326	90.8128	3.3175	2.1183	0.681	12.5895	2.6885	1.1523	0.7373	1.3459	4.9287	0.3371		0.1148	0.5339	4.8234	83.44	0.3857	0.8348	1.3231	40.4051	1.757	0.4823	113.741	0.0462	0.4873	0.0703
KLM0417-R117	GL	BLAU7	Bezos et al., 2009	ICP-MS	-20.041	-176.129	51.5145	0.999	9.7553	6.6248	15.4799	11.4105	2.2038	0.1186	0.0869	0.1833	1.796	18.7352	0.2898	5.3248	40.6746	34.0116	0.0382	67.0107	3.8075	2.4342	0.7788	15.1838	3.0668	1.4108	0.844	1.5888	5.6881	0.3922	0.1754	0.1822	0.6466	5.5648	49.6106	0.5698	1.0014	1.6344	37.8852	2.0233	0.4805	120.14	0.0546	0.5565	0.0737
KLM0417-R118	GL	BLAU7	Bezos et al., 2009	ICP-MS	-20.034	-176.122	51.3877	0.911028	9.068	7.48809	15.8956	12.4354	2.10355	0.0997306	0.0901217	0.172961	1.722	14.738	0.2642	4.8799	39.3725	153.567	0.031	82.862	3.5907	2.3058	0.7305	14.4056	2.8756	1.3029	0.7929	1.4499	5.0059	0.3689	0.1643	0.1994	0.575	5.2006	68.1624	0.4895	0.9133	1.441	40.6802	1.8803	0.4527	116.419	0.0501	0.5225	0.0665
KLM0417-R093	GL	BLAU7	Bezos et al., 2009	ICP-MS	-20.033	-176.125	50.7378	0.9418	9.1941	7.285	15.5671	12.2503	2.1428	0.1049	0.0801	0.1842		16.2009	0.2827	5.2008	40.1291	174.476	0.0323	85.7736	3.6479	2.3495	0.7428	13.5274	2.9366	1.2939	0.8201	1.5233	5.2897	0.3764	0.1699	0.1266	0.5309	5.4163	67.6813	0.5868	0.9499	1.4443	41.9072	1.9405	0.4947	119.319	0.0468	0.5319	0.0785
KLM0417-R094	GL	BLAU7	Bezos et al., 2009	EMP; FTIR; ICPMS	-20.019	-176.121	51.0342	0.8533	8.9764	7.166	15.6975	12.1368	1.9889	0.1126	0.0777	0.1791	1.424	19.251	0.2779	4.7395	37.6312	177.982	0.0441	89.4495	3.3598	2.1591	0.6967	12.5434	2.7222	1.2188	0.753	1.3952	4.9739	0.3485		0.2958	0.556	4.9698	65.1091	0.6116	0.8723	1.4775	39.1293	1.7932	0.4419	116.15	0.0468	0.4902	0.0745
KLM0417-R120	GL	BLAU7	Bezos et al., 2009	EMP; FTIR; ICPMS	-20.001	-176.108	51.6849	1.21951	11.0516	6.93035	14.4544	11.5754	2.39928	0.0673982	0.104316	0.212355	0.976	8.6811	0.382	6.3621	43.6316	83.4834	0.0171	84.2393	4.9963	3.1996	0.9482	14.1542	4.0042	1.8	1.1034	1.8185	6.4653	0.5023	0.1903		0.8734	6.8181	50.1484	0.4577	1.1858	0.9862		2.5275	0.6724	83.5522	0.0699	0.7158	0.0808
KLM0417-R122	GL	BLAU7	Bezos et al., 2009	EMP; FTIR; ICPMS	-19.985	-176.105	51.5115	1.15306	10.2938	7.19482	14.9503	11.9469	2.27562	0.0725885	0.0917173	0.201557	0.994	10.8029	0.3444	6.054	41.8514	150.552	0.0241	86.9136	4.5638	2.9424	0.8838	13.833	3.6855	1.6627	1.0212	1.7506	6.2674	0.4608	0.1799		0.7866	6.4916	57.9345	0.4014	1.1212	1.1629		2.3814	0.6055	92.8882	0.0636	0.6694	0.0812
KLM0417-R123	GL	BLAU7	Bezos et al., 2009	EMP; FTIR; ICPMS	-19.977	-176.099	51.3308	1.07676	9.93144	7.65144	14.9786	12.1992	2.19096	0.0633864	0.0953814	0.187543	0.74	8.3207	0.3038	5.3273	42.6611	180.998	0.0136	87.8719	4.3405	2.766	0.8258	15.03	3.4759	1.5649	0.9622	1.5381	5.7935	0.4487	0.1763	0.1208	0.7302	5.8804	73.0939	0.37	1.0202	1.0237	42.6647	2.1874	0.5224	86.3042	0.0604	0.6256	0.0661
KLM0417-008-001	GL	BLAU7	Bezos et al., 2009	EMP; FTIR; ICPMS	-19.955	-176.094	51.3442	1.07838	10.1123	7.59845	14.9875	12.0112	2.22535	0.0645641	0.0917173	0.189971	0.716	8.9016	0.3178	5.5957	42.2489	156.557	0.0196	84.0646	4.3726	2.8418	0.8224	12.3258	3.4919	1.5921	0.9805	1.5895	5.8532	0.4514		0.1165	0.7531	6.0949	66.2009	0.4392	1.0462	0.9462	42.3503	2.2389	0.6099	80.0686	0.0592	0.6389	0.0663
KLM0417-R121	GL	BLAU7	Bezos et al., 2009	EMP; FTIR; ICPMS	-19.911	-176.106	51.5386	1.22844	10.9233	7.15088	14.5616	11.5416	2.39389	0.0653117	0.10476	0.194325	0.669	8.1129	0.3653	6.0984	44.4703	75.3946	0.0128	79.6811	4.9598	3.2235	0.9421	16.2355	3.957	1.8545	1.1196	1.7314	6.6252	0.5108	0.1928	0.137	0.8664	6.7462	53.4374	0.4003	1.1818	1.0386	42.628	2.5354	0.6221	84.255	0.0713	0.7194	0.0733
WASRNDB-005-008	GL	BLAU	HAHM, 2012; HANAN, 2013; TIAN, 2008	EMP; ICPMS; MC-ICP-MS; MS; SIMS; TIMS	-19.9083	-176.058	51.32	0.89	9.28	8.14	14.93	13.19	1.94	0.04	0.06	0.18	0.24	6.4		3.89					3.07	1.97	0.6				0.69	1.15					0.63	4.77		0.56	0.73	0.61		1.56		55.41	0.04	0.38	0.06
KLM0417-047-004	GL	BLAU7	Gale, 2013	ICP-MS	-19.908	-176.08												14.6808	0.2036	4.113	36.1287	295.824	0.0438	101.51	2.5471	1.6013	0.5885	13.0801	2.1093	0.808	0.5625	1.3118	4.3364	0.2546	0.1467	0.0972	0.2931	4.3271	62.901	0.4892	0.7679	3.061	39.504	1.4699	0.2829	185.892	0.0301	0.3761	0.068
KLM0417-047-007	GL	BLAU7	Gale, 2013	ICP-MS	-19.908	-176.08												5.4329	0.2609	4.9746	44.6824	249.773	0.0098	101.453	4.1426	2.6702	0.8002	13.0873	3.2946	1.4168	0.9288	1.4536	5.5996	0.419	0.1758		0.8372	5.5034	85.6789	0.2417	0.9257	0.5078		2.0523	0.5368	66.3684	0.0654	0.6102	0.0707
KLM0417-R011	GL	BLAU7	Bezos et al., 2009	EMP; FTIR; ICPMS	-19.85	-176.049	51.5075	1.19431	11.034	7.33376	14.3951	11.3643	2.53643	0.0580825	0.0762709	0.213639	0.44	8.6388	0.3347	5.913	45.0986	141.024	0.0119	90.7669	4.9102	3.1845	0.9074	16.3882	3.8804	1.7375	1.0967	1.7238	6.4362	0.5063	0.1865	0.1636	1.0604	6.4295	59.0778	0.4439	1.1111	1.1013	41.0745	2.4051	0.6417	71.889	0.0809	0.7126	0.0911
KLM0417-007-001	GL	BLAU7	Bezos et al., 2009	EMP; FTIR; ICPMS	-19.795	-176.034											0.686	7.167	0.3033	5.3923	44.9544	234.8	0.0109	90.58	4.3564	2.8172	0.8416	15.7875	3.4294	1.548	0.9685	1.5479	5.7449	0.446	0.1804	0.1531	0.8289	5.8866	80.6683	0.4327	1.0118	0.8086	42.214	2.1677	0.5538	87.763	0.0657	0.6307	0.0739
KLM0417-007-002	GL	BLAU7	Bezos et al., 2009	EMP; FTIR; ICPMS	-19.795	-176.034	52.0302	1.29723	11.915	6.90805	13.9813	10.8936	2.33215	0.0467635	0.113697	0.212142	0.365	7.846	0.3436	6.35	46.9131	43.5392	0.0132	82.5716	5.3015	3.4988	0.9594	17.2141	4.1804	1.9006	1.1993	1.8256	7.3823	0.5607	0.2018	0.1736	0.979	6.9357	43.2926	0.4748	1.1942	0.91	41.1961	2.6045	0.6706	65.839	0.077	0.7665	0.0868
KLM0417-007-004	GL	BLAU7	Bezos et al., 2009	EMP; FTIR; ICPMS	-19.795	-176.034	50.2678	0.941934	9.13611	8.14599	15.7215	12.948	2.28337	0.0406067	0.0712133	0.183235	0.719	6.3918	0.2825	4.7366	43.0854	333.702	0.009	96.203	3.7349	2.4078	0.7688	14.8914	2.9895	1.2932	0.825	1.3551	4.9834	0.3759	0.1656	0.1417	0.7266	5.2555	99.1801	0.3816	0.9	0.7759	42.0036	1.9021	0.4999	99.8744	0.0583	0.5446	0.0665
KLM0417-007-005	GL	BLAU7	Bezos et al., 2009	EMP; FTIR; ICPMS	-19.795	-176.034	50.274	0.956688	9.2532	8.11303	15.6013	12.9614	2.29044	0.0431968	0.0639878	0.17854	0.754	6.8648	0.3031	4.772	42.9348	358.88	0.009	96.7752	3.7728	2.399	0.7763	14.7797	2.9879	1.3029	0.835	1.3674	4.8444	0.3769	0.1657	0.1298	0.7526	5.2396	92.7763	0.3915	0.9022	0.7586	41.5035	1.8864	0.4891	100.49	0.0585	0.5492	0.0657
KLM0417-R010	GL	BLAU7	Bezos et al., 2009	EMP; FTIR; ICPMS	-19.733	-176.016	51.7089	1.213	11.3862	7.17937	14.1685	11.1545	2.54488	0.0551271	0.0920793	0.215086	0.324	9.1659	0.3278	6.4504	45.3088	100.978	0.0149	91.5605	5.086	3.3356	0.9393	14.4307	4.0783	1.8504	1.1438	1.9032	6.7165	0.5241		0.1379	1.2896	6.9156	53.9938	0.2924	1.1996	1.145	42.4543	2.5788	0.6675	71.05	0.0929	0.7405	0.1058
DAR0033-022-006-1	GL	BLAU7	PEATE, 2001	ICP-MS; MS-ID	-19.688	-175.993	51.1725	1.20604	11.1014	7.11592	14.6211	11.5235	2.53336	0.0802178	0.120327			13.4		6.82	46.4	81	0.01	97	5.12	3.27	1	16.7	4.03	1.95	1.12	2.15	7	0.52			1.72	7.33	54	0.443	1.25	1.58	43.9	2.62		83	0.123	0.75	0.155
DAR0033-022-006-2	WR	BLAU7	PEARCE, 1995	AAS; ICP-MS	-19.688	-175.993	52.1612	1.20945	11.0088	7.28692	13.9899	11.2316	2.48195	0.0600352	0.0900528	0.190111		13.5		7.09	41	77		99	4.7	3.1	1.03		3.77	1.43	1	2.21	8	0.49			1.67	7.17	48	0.32	1.21	1.7	40	2.55		80	0.12	0.71	0.12
KLM0417-006-001	GL	BLAU7	Bezos et al., 2009	EMP; FTIR; ICPMS	-19.625	-175.984	52.3918	1.34854	11.601	6.45207	14.4043	10.3701	2.65701	0.10283	0.106646	0.212087	0.774	12.9594	0.3914	6.8924	43.385	30.9109	0.0262		5.3466	3.4494	1.0483	14.1746	4.3214	1.9501	1.1972	2.0576	7.3796	0.5459		0.1846	1.2909	7.4173	38.1336	0.5095	1.2805	2.0481	41.5524	2.7319	0.6856	79.24	0.0961	0.7831	0.1133
KLM0417-006-002	GL	BLAU	BEZOS, 2009	EMP; FTIR; ICPMS	-19.625	-175.984	52.17	1.34	11.55	6.43	14.29	10.27	2.65	0.105	0.116	0.21	0.921	14.3		7.71	43	57	0.026		5.77	3.72	1.09	14.3	0.85	2.19	1.3	2.33	7.39	0.59			1.57	8.23	46	0.52	1.42	2.13	40.6	2.98	0.76	79	0.112	4.68	0.132
KLM0417-006-00T2	GL	BLAU7	Bezos et al., 2009	ICP-MS	-19.625	-175.984	52.4415	1.34878	11.6101	6.46194	14.3651	10.3238	2.66217	0.105538	0.116393	0.207156		14.3232	0.4148	7.7088	42.9776	57.2815	0.0262		5.7718	3.7164	1.0941	14.3103	4.6771	2.1868	1.3023	2.3278	7.3914	0.5908		0.205	1.5665	8.2303	45.5704	0.5162	1.4247	2.1313	40.5974	2.9797	0.7611	78.5315	0.1124	0.8521	0.1325
KLM0417-R008	GL	BLAU7	Bezos et al., 2009	EMP; FTIR; ICPMS	-19.586	-175.976	52.4224	1.1171	10.6646	7.05959	14.6604	11.009	2.3039	0.111149	0.103239	0.182045	0.817	13.8682	0.3188	5.853	42.1215	155.753	0.0323	67.9571	4.6996	3.0821	0.8533	13.1709	3.6883	1.5851	1.0555	1.7698	6.741	0.4935		0.1308	1.1547	6.1891	65.6722	0.4549	1.0745	2.2532	41.2117	2.324	0.563	69.495	0.0871	0.6762	0.0983
KLM0417-R007	GL	BLAU7	Bezos et al., 2009	EMP; FTIR; ICPMS	-19.55	-175.971	51.7145	0.992206	9.9583	7.7957	14.6387	12.1401	2.17544	0.0522002	0.068563	0.186315	0.33	7.4056	0.2485	4.7087	43.7894	236.369	0.0139	85.1708	4.1475	2.6967	0.7771	12.2438	3.2372	1.3815	0.9324	1.3704	5.9259	0.4306		0.1038	0.8799	5.2301	76.9499	0.3368	0.8851	0.9706	43.1656	2.0043	0.4887	61.0542	0.0679	0.6048	0.067
MIR2239-001	GL	BLAU7	Sun et al., 2003, DANYUSHEVSKY, 1993	LA-ICP-MS	-19.514	-175.961	50.88	1.25	10.5	6.94	14.19	11.76	2.37	0.08	0.12	0.19	0.81	12.4		6.25			0.02	115	4.57	2.95	0.89		3.37	1.43		1.87		0.44		0.18	1.16	5.84		0.38	1.09	1.85	41.3	2.35		87			0.11
MIR2239-002	GL	BLAU7	Sun et al., 2003, DANYUSHEVSKY, 1993	LA-ICP-MS	-19.514	-175.961	51.26	1.18	10.88	7.41	14.27	11.96	2.38	0.09	0.05	0.17	0.78	13.9		6.6			0.02	115	4.8	3.2	0.94		3.7	1.6		2		0.46		0.31	1.3	6.8		0.53	1.1	1.9	44.2	2.6		84.7			0.12
DAR0033-020-001-1	WR	BLAU7	PEARCE, 1995	AAS; ICP-MS	-19.488	-175.963	51.7423	1.00298	10.3811	8.01723	14.4271	11.8199	2.05825	0.040161	0.0602415	0.190765		8.6		5.04	41	260		104	4.22	2.88	0.9		3.32	1.12	0.96	1.64	7	0.45			0.83	5.59	75	0.47	0.94	0.93	35	2.13		64	0.05	0.63	0.06
DAR0033-020-005-2	GL	BLAU7	PEATE, 2001	ICP-MS; MS-ID	-19.488	-175.963	58.1	1.01	11.349	2.59	12.53	6.36	4.08	0.31	0.06	0.19		7.3		4.82	46	153	0.01	82	4.38	2.89	0.8	15.7	3.28	1.52	0.98	1.42	7	0.48			0.88	5.56	67	0.283	0.94	0.92	41.7	2.16		59	0.06	0.63	0.0755
KLM0417-005-001	GL	BLAU7	Bezos et al., 2009	EMP; FTIR; ICPMS	-19.452	-175.958	50.9796	0.923463	9.80025	8.20718	14.8316	12.4702	2.23177	0.0381943	0.0731891	0.187172	0.242	5.5142	0.2738	4.8749	43.9715	404.329	0.0097	94.4075	4.11	2.6706	0.7863	11.85	3.2689	1.4421	0.929	1.3831	5.4726	0.4272		0.0989	0.8515	5.3948	90.5692	0.2905	0.9136	0.6441	43.4163	2.0653	0.5755	64.5362	0.0658	0.6037	0.0625
DAR0033-021-001-1	WR	BLAU7	PEARCE, 1995	AAS; ICP-MS	-19.44	-175.927	51.0199	1.01857	9.56261	8.35394	14.6449	12.7414	2.02877	0.079971	0.0699747	0.159942		10.3		5.17	38	437		104	4.4	2.95	0.87		3.42	1.2	0.96	1.63	8	0.46			0.86	5.6	94	0.57	0.93	1.03	35	2.29		77	0.06	0.65	0.09
DAR0033-021-004-1	WR	BLAU7	PEARCE, 1995	AAS; ICP-MS	-19.44	-175.927	51.28	0.801396	8.42939	8.40095	15.9153	12.8221	1.85014	0.0401113	0.0501392	0.150418		9.6		4.23	40	480		89	3.31	2.15	0.63		2.41	0.94	0.74	1.33	6	0.36			0.76	4.26	112	0.65	0.73	1.03	34	1.63		61	0.05	0.47	0.06
KLM0417-R005	GL	BLAU	BEZOS, 2009	EMP; FTIR; ICPMS	-19.381	-175.961	50.55	0.97	9.77	8.06	14.56	12.52	2.27	0.039	0.065	0.19	0.229	6.6		4.91	42.9	339	0.008	94	4.1	2.65	0.77	13.4	0.59	1.4	0.94	1.41	5.43	0.42			0.84	5.36	81	0.33	0.92	0.67	41.9	2.07	0.53	68	0.067	3.23	0.074
KLM0417-004-001	GL	BLAU6	Gale, 2013	ICP-MS	-19.339	-176.162	51.235	1.24519	10.4616	7.49044	14.3898	11.9992	2.56059	0.0488113	0.0969225	0.199246		5.892	0.3368	5.9131	43.0827	141.676	0.006		4.9019	3.0717	1.0143	13.1918	4.0042	1.8315	1.0843	1.6188	5.9361	0.4744		0.1463	0.8876	6.8805	68.9655	0.444	1.1543	0.6332	42.5437	2.6147	0.6384	77.8498	0.0682	0.7261	0.0724
WASRNDB-031-001	GL	BLAU	HAHM, 2012; HANAN, 2013; TIAN, 2008	EMP; ICPMS; ICP-OES; MC-ICP-MS; MS; SIMS; TIMS	-19.3233	-176.163	51.44	1.21	10.61	6.28	15.31	11.61	2.54	0.08	0.07	0.22	0.23	8.74		5.13		129			4	2.57	0.94				0.94	1.57					0.8	5.81	65	0.21	1.12	1		2.29		127.13	0.14	0.48	0.16
DAR0033-041-002-1	GL	BLAU6	PEATE, 2001	ICP-MS; MS-ID	-19.277	-176.173	50.1723	0.802866	8.85619	8.7239	15.7968	12.9131	2.09067	0.0801023	0.0801023			15.2		4.69	43.6	426	0.01	89	3.21	2.05	0.68	14.4	2.5	1.16	0.7	1.6	6	0.33			1.33	4.84	104	0.274	0.83	1.38	40.3	1.72		88	0.09	0.47	0.108
DAR0033-041-003-2	WR	BLAU6	PEARCE, 1995	AAS; ICP-MS	-19.277	-176.173	50.8199	0.793522	8.13747	8.44449	16.1533	13.2035	1.89637	0.06033	0.050275	0.150825		13.8		5.06	41	397		93	3.21	1.9	0.71		2.33	1.1	0.78	1.63	6	0.35			1.3	4.99	89	0.78	0.87	1.33	34	1.83		87	0.09	0.47	0.08
KLM0417-R004	GL	BLAU6	Gale, 2013	ICP-MS	-19.237	-176.144	51.0039	0.925659	9.24169	8.2389	15.1045	12.5928	2.34078	0.0425926	0.0645434	0.181245		5.9174	0.2933	4.9183	42.2117	361.42	0.0063		3.859	2.4717	0.7836	12.2647	3.1016	1.3515	0.8474	1.4699	5.086	0.3883		0.1501	0.8619	5.2732	88.6272	0.264	0.9119	0.6262	41.5398	1.9716	0.4973	78.0364	0.0649	0.5646	0.0692
WASRNDB-015-008	GL	BLAU	HAHM, 2012; HANAN, 2013; TIAN, 2008	EMP; ICPMS; ICP-OES; MC-ICP-MS; MS; SIMS; TIMS	-19.225	-176.533	50.69	2.15	15.44	5.23	12.86	9.92	2.99	0.13	0.16	0.29	0.5	22.69		2.96		11			1.79	1.2	0.38				0.42	0.95						2.99	34.9	0.84	0.52	4.74		1.15		71.11		0.27	0.11
DAR0033-010-001-1	WR	BLAU5	PEARCE, 1995	AAS; ICP-MS	-19.142	-176.527	52.3	2.61	16.371	3.24	12.06	7.6	3.24	0.22	0.41	0.27		32.2		29.29	36	7		50	16.29	10.94	2.87		13.73	7.78	3.93	9.3	17	1.63			6	31.2	16	1.75	5.09	4.7	38	10.4		89	0.42	2.43	0.57
DAR0033-010-001-3	GL	BLAU5	PEATE, 2001	ICP-MS; MS-ID	-19.142	-176.527	51.5	2.53	16.551	3.3	12.27	7.92	3.34	0.17	0.43	0.27		30.4		29.3	39.9	10	0.04	55	18.36	11.63	3.13			8.56	4	8.85	18	1.81			5.84	30.8	25	1.11	5.37	3.85	35.7	10.79		86	0.47	2.76	0.504
DAR0033-011-001-1	WR	BLAU5	PEARCE, 1995	AAS; ICP-MS	-19.115	-176.553	50.3746	2.79087	17.4205	4.80299	11.7856	8.81567	3.04969	0.110944	0.201716	0.282402		18.3		15.3	49	10		90	11.24	7.55	2.1		8.84	4.05	2.46	4.43	11	1.17			2.66	16.76	25	0.84	2.85	1.67	43	6.21		80	0.22	1.67	0.24
DAR0033-011-001-2	WR	BLAU5	PEARCE, 1995	AAS; ICP-MS	-19.115	-176.553	51.0367	2.57229	17.0881	4.84004	11.6529	8.79553	3.0637	0.111077	0.19186	0.282741		19.3		15.43	50	9		92	11.27	6.92	2.13		7.67	4.32	2.43	4.68	11	1.15			3.18	15.54	20	1.27	2.82	3.6	41	5.49		83	0.25	1.43	0.29
DAR0033-011-002-1	GL	BLAU5	PEATE, 2001	ICP-MS; MS-ID	-19.115	-176.553	50.7125	2.50093	17.435	4.86194	11.7212	8.79361	3.06907	0.0901267	0.200282	0.280394		17.2		15.4	57.3	8	0.02	97	11.44	7.27	2.12	23.4	9.04	4.61	2.49	4.59	11	1.14			3.09	17	31	0.606	2.91	1.84	46.5	6.22		84	0.221	1.7	0.228
DAR0033-013-001-1	WR	BLAU5	PEARCE, 1995	AAS; ICP-MS	-18.973	-176.567	60.5	1.2	10.8	1.48	12.8	5.42	4.36	0.39	0.35	0.22		48.7		45.57	18	10		33	21.54	14.16	3.1		18.06	12.38	4.73	14.51	27	2.11			7.62	40.44	5	3.76	7.37	9.8	18	12.71		80	0.53	3.13	1.09
DAR0033-013-001-5	WR	BLAU5	PEARCE, 1995	ICP-MS	-18.973	-176.567												63.3		55.32					27.85	17.13	4.03		21.42	16.56	6.06	17.34		2.82			8.42	50.01		2.28	9.02	9.3		16.56		92	0.32	3.88	1
DAR0033-013-001-6	WR	BLAU5	PEARCE, 1995	AAS; ICP-MS	-18.973	-176.567	60.4	1.27	11.592	1.44	12.7	5.38	4.31	0.47	0.4	0.22		55		50.77	18	5		34	25.2	16.32	3.83		19.3	13.57	5.65	16.06	27	2.47			8.49	43.5	6	3.29	8.47	9	15	14.3		87	0.55	3.66	1.11
DAR0033-013-002	GL	BLAU5	KENT, 2002; MELSON, 2003; PEATE, 2001	EMP; FTIR; ICPMS; MS	-18.973	-176.567	60.88	1.24	11.51	1.3	12.69	5.4	4.24	0.51	0.27		1.66	62		52.9	17.8	6	0.1	37	26.98	17.38	4.09	27.4	22.08	16.46	5.9	16.8		2.78			8.76	50.7	19	2.54	9.28	8.67	18.9	16.45		89	0.608	4.07	1.123
DAR0033-014-004-1	WR	BLAU5	PEARCE, 1995	AAS; ICP-MS	-18.973	-176.53	50.3	0.83	8.73	7.79	15.84	12.47	2.23	0.1	0.06	0.19		18		5.48	39	278		113	3.65	2.32	0.77		2.84	0.94	0.8	1.97	4	0.37			0.63	5.1	87	1.39	0.91	1.36	41	1.87		188	0.04	0.53	0.12
DAR0033-012-001-1	WR	BLAU5	PEARCE, 1995	AAS; ICP-MS	-18.922	-176.553	51.0078	1.64051	12.5661	6.89941	13.3796	11.1487	2.61728	0.0801079	0.110148	0.23031		12.8		9.23	46	154		99	6.79	4.46	1.36		4.93	2.46	1.47	2.78	8	0.7			1.32	10.15	61	1	1.94	1.36	45	3.67		80	0.1	0.96	0.11
DAR0033-012-005-2	GL	BLAU5	PEATE, 2001	ICP-MS; MS-ID	-18.922	-176.553												38.9		40	31.1	8	0.06	49	20.81	13.33	3.13	23.7	17.06	11.91	4.56	12.6		2.13			6.39	38.8	13	1.32	7.07	5.52	29.1	12.69		86	0.457	3.14	0.938
DAR0033-012-005-3	WR	BLAU5	PEARCE, 1995	AAS; ICP-MS	-18.922	-176.553	58.9	1.57	11.295	2.63	12.67	6.42	4.24	0.3	0.34	0.2		49.8		47.37	25	17		47	22.03	13.83	3.01		17.15	13.78	4.77	14.91	22	2.38			6.1	41.57	10	1.61	7.82	6.66	24	13.95		89	0.23	3.16	1.13
DAR0033-015-001-1	GL	BLAU5	PEATE, 2001	ICP-MS; MS-ID	-18.883	-176.562												7.7		5.91	41.8	325	0.01	99	4.78	3.04	0.98	16.1	3.68	1.8	1.05	1.73		0.47			1.12	6.82	73	0.348	1.13	0.72	44.6	2.54		94	0.089	0.71	0.09
DAR0033-015-001-2	WR	BLAU5	PEARCE, 1995	AAS; ICP-MS	-18.883	-176.562	50.4253	1.16298	9.92399	7.66141	15.4519	12.334	2.48945	0.0401443	0.0702525	0.180649		10.2		6.36	38	335		106	4.61	2.91	0.99		3.52	1.81	1.04	1.77	7	0.46			1.06	7.04	79	0.29	1.15	0.77	41	2.67		102	0.06	0.67	0.07
DAR0033-015-001-6	WR	BLAU5	PEARCE, 1995	AAS; ICP-MS	-18.883	-176.562	51.5675	1.50072	12.5399	6.75208	13.1197	11.0061	2.65136	0.129335	0.119386	0.218874		16.3		10.03	49	82		98	7.17	4.55	1.34		5.39	2.55	1.61	3	9	0.74			1.52	10.61	52	0.58	1.71	1.37	40	3.94		87	0.08	1.04	0.12
SON0048-G046	GL	BLAU4	LOOCK, 1992;SUNKEL, 1990; PEATE, 2001; AREVALO JR, 2008	MS-ID; XRF; ICP-MS; LA-ICP-MS	-18.7345	-176.511	50.7413	1.35914	11.889	7.34943	14.0042	11.6785	2.41625	0.0201354	0.0906094	0.22149		8.18		7.02	46.5	73	0.0102	105	5.7	3.67	1.13	16.6	4.53	2.06	1.25	2.06		0.56			1.27	7.44	65	0.435	1.29	0.816	40.5	3.02		79.3	0.104	0.84	0.103
MIR2231-003	GL	BLAU4	Sun et al., 2003, DANYUSHEVSKY, 1993	LA-ICP-MS	-18.6225	-176.435	50.09	1.35	11.09	7.95	13.85	12.28	2.79	0.06	0.06	0.19	0.22	8		7.3			0.01	114	5.7	3.6	1.2		4.4	1.9		2.1		0.5		0.25	1	8		0.5	1.3	0.8	49.1	3		97.8			0.1
MIR2231-002	GL	BLAU4	Sun et al., 2003	LA-ICP-MS	-18.6213	-176.431	50.0999	1.28248	10.9754	8.04687	14.1464	12.3014	2.57308	0.0499031	0.0798449	0.16967		7.27		6.1			0.01	120	5.09	3.27	0.99		3.82	1.64		1.72		0.47		0.2	0.92	6.21		0.38	1.11	0.85	47.5	2.53		78			0.07
MIR2231-005	GL	BLAU4	Sun et al., 2003, DANYUSHEVSKY, 1993	LA-ICP-MS	-18.6118	-176.421	51.08	1.61	11.36	6.91	13.83	11.64	2.86	0.06	0.13	0.23	0.3	8.5		8.6			0.01	108	6.4	4	1.3		5	2.3		2.4		0.58		0.29	1.2	9.2		0.52	1.5	0.86	47.2	3.4		86.5			0.12
MIR2231-006	GL	BLAU4	Sun et al., 2003	LA-ICP-MS	-18.6097	-176.426	50.5427	1.53008	11.7968	7.53953	13.6069	11.5895	2.76023	0.0698359	0.089789	0.169601		8.38		8.42			0.01	103	6.28	3.98	1.23		4.8	2.2		2.43		0.59		0.23	1.19	8.13		0.47	1.51	0.89	46.9	3.36		86			0.11
MIR2231-013	GL	BLAU4	Sun et al., 2003, DANYUSHEVSKY, 1993	LA-ICP-MS	-18.6072	-176.443	50.49	1.57	11.89	7.38	13.75	11.49	2.83	0.06	0.07	0.17	0.31	8.28		8.58			0.01	108	6.32	3.97	1.23		4.88	2.2		2.47		0.59		0.27	1.18	8.33		0.51	1.55	0.92	45	3.36		87			0.1
MIR2231-007	GL	BLAU4	Sun et al., 2003	LA-ICP-MS	-18.607	-176.443	50.5171	1.59193	11.7954	7.36707	13.7412	11.4687	2.86445	0.0698277	0.0997539	0.179557		8.81		9.36			0.01	104	6.9	4.34	1.35		5.34	2.45		2.67		0.65		0.25	1.31	9.08		0.52	1.65	0.95	46.8	3.75		92			0.13
MIR2231-008	GL	BLAU4	Sun et al., 2003, DANYUSHEVSKY, 1993	LA-ICP-MS	-18.607	-176.443	49.78	1.31	10.6	7.33	14.33	12.13	2.61	0.06	0.12	0.2	0.3	7.64		6.38			0.01	120	5.33	3.43	1.03		4.08	1.7		1.79		0.51		0.2	0.94	6.48		0.37	1.17	0.89	47.2	2.66		81			0.08
SON0048-G018-002	GL	BLAU4	CHAUSSIDON, 1994; DERUELLE, 1992; HILTON, 1993; JAMBON, 1990; KENT, 2002; LOOCK, 1992; PEATE, 2001	EMP; ICPMS; IMP; INAA; MS; MS-ID; XRF	-18.5952	-176.44	50.7389	1.48641	11.6101	6.99015	14.3519	11.4092	2.70165	0.0803466	0.110477	0.200866	0.272	8		8.18	44.7	143	0.011	95	6.24	3.95	1.25	16.8	5.01	2.41	1.37	2.39		0.59			1.28	8.63	66	0.452	1.5	0.76	42.1	3.42		84.5	0.105	0.93	0.116
SON0048-G042	GL	BLAU4	AREVALO JR, 2008; CHAUSSIDON, 1994; DERUELLE, 1992; HILTON, 1993; JAMBON, 1990; KENT, 2002; LOOCK, 1992; PEATE, 2001	EMP; ICPMS; IMP; INAA; LA-ICPMS; MS; MS-ID	-18.5755	-176.412	50.3246	1.08062	10.1296	8.10971	14.8762	12.6342	2.24204	0.0605956	0.0706948	0.181787	0.174	6.76		5.4	46.2	305	0.00895	116	4.69	2.98	0.94	15.7	3.74	1.62	1.02	1.58		0.45			0.95	5.87	106	0.353	1.01	0.654	44	2.42		78.5	0.08	0.7	0.0756
SON0048-G007	GL	BLAU4	AREVALO JR, 2008; CHAUSSIDON, 1994; DERUELLE, 1992; HILTON, 1993; JAMBON, 1990; LOOCK, 1992; SUNKEL, 1990	EMP; IMP; INAA; LA-ICPMS; MS; MS-ID; TITR; XRF	-18.5745	-176.419	49.743	1.03673	11.1348	8.31376	14.6737	12.4906	2.14323	0.00996853	0.0598112	0.179434	0.175	6.72		4.54	48	313	0.00827	114	4.94	3.21	0.9		3.69		1.05	1.57		0.46			1.15	6.1	97	0.348	0.92	0.634		2.38		77.5		0.67	0.0738
WASPPTU-4-030-001	GL	BLAU	HAHM, 2012; HANAN, 2013; TIAN, 2008; VOLPE, 1988	EMP; ICPMS; ICP-OES; MC-ICP-MS; MS; SIMS	-18.5467	-176.512	51.51	1.32	11.45	7	14.4	11.45	2.69	0.08	0.1	0.2	0.22	9.5		6.94		152			6.37	3.96	1.1				1.38	2.52					1.59	7.67	69.3	0.39	1.43	0.87		3		89.7	0.11	1.02	0.11
SSV0708-058	GL	BLAU	Jenner, 2012	EMPA, LA-ICPMS	-18.49	-176.39	49.8769	1.12015	11.2195	7.53106	14.2616	12.0458	2.38806	0.0366068	0.0635113	0.192933		6.65683	0.210629	4.84374	51.2017	178.953	0.00803797	134.761	4.44221	2.9745	0.949425	17.2739	3.72914	1.51821	1.00691	1.44227	5.20941	0.419737	1610.29	0.135364	0.921159	5.9074	76.0117	0.282524	0.984284	0.679436	51.4147	2.42424	0.647979	74.6857	0.0537287	0.654414	0.0711857
SSV0708-059	GL	BLAU	Jenner, 2012	EMPA, LA-ICPMS	-18.39	-176.34	48.5234	1.0324	10.4017	8.05275	15.9275	12.1135	2.25043	0.049457	0.0357106	0.186994		9.41436	0.252545	5.3009	49.5211	335.216	0.0100142	121.111	4.4235	2.88458	0.990247	16.4025	3.5293	1.50795	0.983459	1.60477	4.89054	0.411212	1498.86	0.182427	0.982732	6.33814	124.646	0.367498	1.05609	0.881619	49.1631	2.36969	0.65977	108.726	0.0548578	0.639652	0.0794597
SSV0708-063	GL	BLAU	Jenner, 2012	EMPA, LA-ICPMS	-18.26	-176.45	48.7054	0.77904	9.16353	9.83015	17.3642	12.663	1.91326	0.018663	0.0360193	0.152696		2.95173	0.147259	2.95085	54.8178	387.588	0.00277308	151.015	3.17557	2.08265	0.699202	16.1799	2.59074	1.01921	0.692663	0.802053	3.94675	0.275712	1320.35	0.109636	0.410223	3.97977	209.339	0.170969	0.619471	0.209636	36.3258	1.6913	0.511057	77.0377	0.0257518	0.468465	0.0302256
SSV0708-061	GL	BLAU	Jenner, 2012	EMPA, LA-ICPMS	-18.21	-176.39	50.9791	0.682375	9.20299	8.55082	15.0679	13.8137	1.78843	0.0297831	0.0234019	0.179182		4.36379	0.153839	2.85349	52.0682	363.967	0.00458703	175.565	3.16425	2.1226	0.654652	16.0114	2.45739	0.884954	0.694189	0.886207	4.27222	0.299965	1492.56	0.110288	0.539123	3.57596	103.523	0.176063	0.577617	0.354832	52.1208	1.47016	0.430915	61.585	0.030551	0.435377	0.0431813
SSV0708-064	GL	BLAU	Jenner, 2012	EMPA, LA-ICPMS	-18.12	-176.36	49.8927	0.844879	10.6591	8.13916	14.7202	12.6171	2.04186	0.0355764	0.0376399	0.178704		6.22969	0.212031	4.14947	51.9022	253.565	0.00868541	165.816	3.60388	2.52937	0.795195	16.2218	2.88624	1.15383	0.821661	1.27748	4.69775	0.368977	1521.93	0.142472	0.79542	4.73492	103.14	0.274535	0.827413	0.716684	48.0611	1.8573	0.527608	71.9956	0.046343	0.525863	0.0596754
SSV0708-065	GL	BLAU	Jenner, 2012	EMPA, LA-ICPMS	-18.03	-176.32	50.9559	0.855	10.3113	8.08686	14.834	12.8243	2.02278	0.0375788	0.0605209	0.204631		6.5603	0.230844	4.08035	51.906	200.079	0.00888466	173.303	3.73182	2.41379	0.743706	16.3286	2.74192	1.1059	0.813483	1.2822	5.02544	0.364625	1572.35	0.130145	0.804079	4.43401	92.9763	0.284783	0.75772	0.705225	47.5802	1.76221	0.532798	67.9386	0.0479642	0.509737	0.0636973
KLM0417-057-001	GL	BLAU	Escrig, 2012	EMPA, ICP-MS, MC-ICP-MS, FTIR	-17.8221	-174.532	54.8033	0.887708	11.1096	4.89317	14.3302	9.41149	1.8846	0.806889	0.218473	0.210325	1.30335	90.8761	0.326207	8.31904	31.682	112.85	0.221759	101.423	2.84506	1.79427	0.757339	14.9743	2.59463	0.930304	0.618148	3.35111	5.32092	0.291773		0.338082	0.581173	6.92768	33.0854	1.86496	1.34678	12.3057	41.2597	2.0937	0.488825	256.832	0.0454346	0.443004	0.30146
KLM0417-057-004	GL	BLAU	Escrig, 2012	EMPA, ICP-MS	-17.8221	-174.532	54.6446	0.901656	11.1437	5.01058	14.2756	9.52471	1.87715	0.812854	0.218263	0.213215		112.41	0.422691	10.4452	31.288	27.3477	0.269979	129.247	3.44262	2.16148	0.900868	15.6973	3.15898	1.15298	0.754011	4.20253	6.56972	0.354664		0.413971	0.728126	8.54485	15.3642	2.34105	1.68201	15.2489	42.3247	2.51375	0.584332	254.016	0.0526468	0.530748	0.380428
KLM0417-058-001	GL	BLAU18	Escrig, 2012	EMPA, ICP-MS, MC-ICP-MS, FTIR	-17.3976	-174.587	51.2547	0.595876	7.91156	7.195	15.9253	12.703	1.65872	0.82713	0.17609	0.15546	1.47222	59.5	0.357556	9.75984	40.4172	434.67	0.37427	100.873	2.58047	1.58659	0.712789	12.0445	2.47147	0.767488	0.553326	3.74261	4.2397	0.250272		0.242886	0.676719	8.33453	141.144	1.65192	1.63069	17.7971	39.694	2.2303	0.834723	190.376	0.0523032	0.404799	0.420419
KLM0417-059-001	GL	BLAU16	Escrig, 2012	EMPA, ICP-MS, MC-ICP-MS, FTIR	-16.4917	-174.542	52.33	0.527038	8.22827	7.14554	15.7874	12.1471	1.51315	0.433589	0.101008	0.151366	1.38018	75.6877	0.265069	5.98122	40.0212	404.585	0.154004	113.864	1.93179	1.21827	0.510257	12.2954	1.71428	0.658764	0.414759	2.46412	4.07859	0.200039		0.134466	1.08428	4.65611	146.951	1.15536	0.927213	7.76038	40.9061	1.3173	0.277982	170.122	0.073578	0.293101	0.268971
KLM0417-060-001	GL	BLAU	Escrig, 2012	EMPA, ICP-MS, MC-ICP-MS, FTIR	-15.9369	-174.6	51.7487	0.664076	8.31333	7.25681	15.6721	12.5841	1.71261	0.647574	0.174767	0.169912	1.20413	97.2362	0.535716	10.3705	42.0505	410.552	0.251101	91.7092	2.47049	1.50378	0.713469	12.7505	2.37938	0.94799	0.536476	4.47312	4.0579	0.23515		0.411058	2.4229	7.35869	150.079	1.19132	1.51523	14.6535	40.9221	2.01958	0.441767	213.176	0.144873	0.394347	0.56589
KLM0417-060-003	GL	BLAU	Escrig, 2012	EMPA, ICP-MS	-15.9369	-174.6	51.5862	0.724676	8.30324	7.1647	15.7207	12.3988	1.79554	0.671717	0.172553	0.155713		99.1187	0.516267	10.7572	40.9758	420.346	0.276121	91.8498	2.57323	1.56524	0.738874	13.0293	2.49389	0.986912	0.552219	4.64317	4.26029	0.245156		0.425423	2.55419	7.60597	138.427	1.23055	1.57974	15.642	40.5674	2.06902	0.458834	215.278	0.153268	0.41073	0.59166
KLM0417-061-001	GL	BLAU12	Langmuir unpub	ICP-MS	-14.9	-174.012												173.079	0.6155	21.9521	34.8006	245.947	0.2919	88.6296	2.7701	1.6404	0.8783	14.7399	2.8918	1.5842	0.5857	10.6659	5.3348	0.2525		0.6518	11.3838	11.824	88.298	1.7234	2.8053	17.7704	35.7218	2.6444	0.5587	250.621	0.6671	0.4559	1.3942
KLM0417-061-003	GL	BLAU12	Langmuir unpub	ICP-MS	-14.9	-174.012												175.486	0.688	22.3689	36.5756	191.348	0.3053	90.7905	2.7622	1.63	0.8798	14.9462	2.8612	1.5955	0.5823	10.8603	5.4182	0.2511		0.6522	11.5923	11.9985	102.683	1.7525	2.8369	18.1497	34.0309	2.6454	0.5495	252.401	0.6779	0.4578	1.4243
KLM0417-062-001	GL	BLAU13	Langmuir unpub	ICP-MS	-15.192	-174.163												171.616	0.6673	20.1269	35.787	181.898	0.3201	92.7684	2.8159	1.6351	0.9215	15.743	2.9237	1.5365	0.5781	9.1979	5.1095	0.2495		0.3763	9.3222	11.6325	54.2713	1.6567	2.6697	19.8001	36.5373	2.6498	0.5428	282.451	0.5239	0.46	1.0111
KLM0417-R127	GL	BLAU18	Escrig, 2012	EMPA, ICP-MS, MC-ICP-MS, FTIR	-17.5835	-174.583	52.0876	0.679519	9.18271	7.08463	15.4309	12.0463	1.69337	0.321165	0.117884	0.176508	1.19586	44.9501	0.256889	4.52713	36.459	135.355	0.109598	94.2748	2.30192	1.47183	0.54171	12.3388	1.90549	0.643349	0.497401	1.66367	3.86017	0.233492		0.119804	0.418097	4.10844	70.5431	0.890824	0.749842	4.39728	40.462	1.34582	0.273633	170.368	0.0337751	0.337936	0.141412
KLM0417-R128	GL	BLAU17	Escrig, 2012	EMPA, ICP-MS, MC-ICP-MS, FTIR	-17.1866	-174.55	53.5452	0.822802	10.7764	5.59863	14.9969	9.88077	2.09868	0.438748	0.153877	0.167249	1.3469	54.8516	0.309746	6.10486	37.1627	47.6216	0.148019	132.933	3.12372	2.05847	0.660609	13.4885	2.5561	0.966211	0.697843	2.27049	5.70811	0.341372		0.137742	0.613256	5.53912	36.1563	1.14744	1.02684	7.06179	36.8638	1.7954	0.361705	151.499	0.0495357	0.449379	0.208112
KLM0417-R129	GL	BLAU17	Escrig, 2012	EMPA, ICP-MS, MC-ICP-MS, FTIR	-17.0249	-174.502	55.4386	1.07401	12.5587	3.80136	14.4762	8.12942	2.42165	0.675535	0.20286	0.20096	1.22959	62.6786	0.349368	7.85158	38.4298	4.65558	0.198723	139.082	3.58076	2.34914	0.791439	14.4752	3.01245	1.18078	0.805755	2.97928	6.31473	0.386288		0.186422	0.728999	7.04949	18.9209	1.47121	1.33013	10.309	34.7851	2.2089	0.432223	173.616	0.0591776	0.528969	0.274779
KLM0417-R130	GL	BLAU	Escrig, 2012	EMPA, ICP-MS, MC-ICP-MS, FTIR	-16.9636	-174.536	55.8824	0.65213	10.7864	4.96005	14.5085	9.3801	1.79367	0.549899	0.140084	0.17089	0.715115	69.3394	0.305129	5.85304	35.1832	13.5956	0.209074	124.994	2.41522	1.59613	0.560526	13.7865	2.02101	0.772638	0.543493	2.28544	5.5721	0.272979		0.389606	0.644113	5.00366	24.2414	1.40817	0.954887	8.43243	38.0771	1.53299	0.308206	170.832	0.0504001	0.358963	0.227957
KLM0417-R131	GL	BLAU16	Escrig, 2012	EMPA, ICP-MS, MC-ICP-MS	-16.8464	-174.529	55.2463	0.430691	9.03351	5.81137	15.7516	10.6841	1.59678	0.404468	0.0871513	0.159967		56.4017	0.25969	5.53206	36.1273	57.6651	0.160251	89.569	2.0214	1.343	0.48603	11.9528	1.74965	0.688079	0.458038	2.11852	5.09616	0.226539		0.353217	0.676642	4.67148	39.7263	1.12721	0.89596	6.8096	39.0406	1.30962	0.277298	186.351	0.0515281	0.304824	0.195406
KLM0417-R132	GL	BLAU16	Escrig, 2012	EMPA, ICP-MS, MC-ICP-MS, FTIR	-16.7413	-174.521	54.6294	0.395364	8.15898	6.88445	15.3848	11.6575	1.33548	0.340421	0.0912876	0.151918	1.405	50.9989	0.223545	3.84456	39.0024	491.406	0.140645	92.2833	1.67771	1.11661	0.389888	10.979	1.36748	0.513517	0.376773	1.52303	4.41016	0.198538		0.337229	0.495594	3.27056	138.768	1.05864	0.622178	5.35332	43.6567	1.02811	0.233593	132.727	0.0390494	0.249817	0.149519
KLM0417-R134	GL	BLAU16	Escrig, 2012	EMPA, ICP-MS, MC-ICP-MS; FTIR	-16.3583	-174.575	53.3537	0.850061	9.19367	6.36602	15.5201	10.6573	2.12003	0.488676	0.160994	0.165656	1.405	69.3918	0.47961	8.55337	36.0827	103.02	0.24873	104.585	3.14485	1.98571	0.758743	13.4546	2.73878	1.18094	0.681681	3.34631	5.53578	0.317576		0.201827	1.9097	6.92455	45.4248	1.00521	1.34952	11.4524	35.6138	2.05833	0.443099	173.516	0.124621	0.471718	0.365324
KLM0417-R135	GL	BLAU16	Escrig, 2012	EMPA, ICP-MS, MC-ICP-MS; FTIR	-16.2664	-174.55	53.4898	0.56717	7.91504	6.65173	16.1278	11.4702	1.50881	0.700287	0.175734	0.136037	1.475	106.455	0.381221	7.42487	35.3464	251.854	0.26533	93.6607	2.16558	1.35404	0.613407	12.5996	2.08607	0.775136	0.473144	2.99569	4.28458	0.223741		0.336029	1.28087	6.03688	68.3323	1.48593	1.18107	13.3608	40.1976	1.72901	0.323364	195.256	0.0897885	0.34191	0.331752
KLM0417-R136	GL	BLAU16	Escrig, 2012	EMPA, ICP-MS, MC-ICP-MS; FTIR	-16.1335	-174.574	51.4858	0.910994	9.68502	6.09186	15.709	11.2987	2.13782	1.00184	0.268022	0.183257	1.211	138.766	0.479801	9.4955	41.7323	384.295	0.357256	98.9907	2.95037	1.81925	0.797698	14.1775	2.76587	1.15109	0.638736	3.81969	4.74847	0.28489		0.412185	1.90643	7.47785	91.2921	1.56267	1.4754	16.2034	40.4873	2.20801	0.453767	218.742	0.123605	0.461753	0.412253
KLM0417-R137	GL	BLAU	Escrig, 2012	EMPA, ICP-MS, MC-ICP-MS; FTIR	-16.0533	-174.583	52.1492	1.00301	9.50019	6.0117	15.6161	11.0907	2.24211	0.638226	0.213484	0.18409	1.309	70.3796	0.538628	9.05643	40.5065	279.684	0.292571	85.6669	3.21762	2.04931	0.77099	13.2585	2.80918	1.20946	0.710385	3.6459	5.0003	0.32509		0.274847	1.97992	7.05189	139.725	0.973042	1.39533	13.8462	35.4809	2.08664	0.490464	198.575	0.131979	0.483656	0.411803
KLM0417-R139	GL	BLAU12	Langmuir unpub	ICP-MS	-15.001	-174.067												227.504	0.9987	29.4357	35.7272	143.287	0.4065	110.699	3.728	2.2132	1.1685	18.1529	3.8239	2.0681	0.7687	14.0758	6.4145	0.3348		0.6398	13.8626	15.6443	92.8353	2.2344	3.7241	23.5801	29.6658	3.4464	0.7235	297.179	0.7678	0.6086	1.7368
KLM0417-R141	GL	BLAU12	Langmuir unpub	ICP-MS	-15.108	-174.123												170.18	0.8658	20.9145	37.3018	9.5918	0.3552	131.498	3.7914	2.285	1.1131	17.2166	3.7181	2.0111	0.797	9.2751	6.4539	0.3479		0.4613	9.1081	12.9275	35.1386	1.6989	2.8657	21.2071	28.5722	3.1494	0.7611	286.943	0.5347	0.6033	0.9861
KLM0417-R142	GL	BLAU13	Langmuir unpub	ICP-MS	-15.367	-174.24												187.152	0.6456	21.2998	38.7979	404.605	0.2753	90.5842	2.4844	1.4408	0.8534	15.1471	2.6559	1.4168	0.5027	10.1201	4.7931	0.2188		0.4039	10.4583	11.5401	81.1634	1.9221	2.73	15.7098	42.1827	2.478	0.4913	279.059	0.5646	0.4133	1.1675
KLM0417-R143	GL	BLAU13	Langmuir unpub	ICP-MS	-15.393	-174.253												118.551	0.6727	15.1188	36.0908	57.5882	0.2549	110.595	3.4802	2.1083	0.9535	15.4063	3.2624	1.6068	0.7349	6.5322	5.2334	0.3284		0.3031	5.4721	9.9724	46.8277	1.3868	2.1423	15.2636	36.1018	2.5944	0.6086	258.216	0.3243	0.5405	0.7461
KLM0417-R144	GL	BLAU13	Langmuir unpub	ICP-MS	-15.422	-174.285												181.25	0.7435	18.6684	33.6852	33.1944	0.3766	116.447	3.2665	2.0015	0.9641	16.7757	3.2231	1.6617	0.6871	8.3897	5.9379	0.3115		0.3932	6.9233	11.5947	48.097	1.8599	2.5756	21.516	33.2525	2.7969	0.6163	261.62	0.4109	0.52	0.9925
KLM0417-R145	GL	BLAU13	Langmuir unpub	ICP-MS	-15.494	-174.349												51.482	0.487	11.136	40.4186	51.489	0.1372	128.527	4.3842	2.7545	1.0245	14.9243	3.7731	1.8088	0.9682	4.2189	5.0181	0.4383		0.3373	2.6011	8.9827	41.0499	0.9033	1.7697	7.369	42.9121	2.752	0.7478	189.867	0.1627	0.6608	0.396
MIR2118-001	GL	BLAU15	Sun et al., 2003	LA-ICP-MS	-15.627	-174.818												44.2		12.6			0.18	67	5.46	3.44	1.18		4.55	2.07		4.42		0.5		0.42	2.47	9.5		1.09	1.96	8.87	41.9	3.39		141	0.17		0.36
MIR2118-003	GL	BLAU15	Sun et al., 2003	LA-ICP-MS	-15.6533	-174.816												65.8		13.4			0.62	83.8	5.08	3.21	1.17		4.18	1.92		4.84		0.48		0.51	2.6	9.85		1.25	2.05	20.9	37.3	3.25		162	0.16		0.53
MIR2118-007	GL	BLAU15	Sun et al., 2003	LA-ICP-MS	-15.615	-174.817												49.2		12.7			0.15	65.6	5.15	3.13	1.11		4.13	1.95		4.61		0.48		0.4	2.83	9.22		1.1	1.93	8.37	38	3.17		141	0.18		0.37
MIR2118-008	GL	BLAU15	Sun et al., 2003	LA-ICP-MS	-15.6138	-174.817												38.3		9.3			0.29	87.7	3.89	2.42	0.91		3.23	1.47		3.25		0.36		0.36	1.96	7		0.77	1.43	10.4	41.6	2.49		135	0.13		0.32
MIR2218-001	GL	BLAU	DANYUSHEVSKY, 1993; SUN, 2003	EMP; FTIR; LA-ICPMS	-15.6615	-174.842	51.98	1.32	9.98	6.42	15.37	11.64	2.75	0.27	0.09	0.18	1.35	44.2		12.6			0.18	67	5.46	3.44	1.18		4.55	2.07		4.42		0.5			2.47	9.5		1.09	1.96	8.87	41.9	3.39		141	0.17		0.36
MIR2218-002	GL	BLAU15	DANYUSHEVSKY, 1993; HONDA, 1993; LAYNE, 2009; SUN, 2003; ZHU, 2020	EMP; FTIR; ICPMS-ID; LA-ICPMS; MC-ICP-MS; MS; SIMS; TIMS	-15.6265	-174.817	51.434	1.3423	9.97954	7.0159	15.1407	11.6743	2.35995	0.2491	0.069748	0.159424	1.32	48.3		12			0.13	68.1	5	3.1	1.1		4.1	2		4.4		0.45		0.48	2.7	9.8		1	1.8	7.8	40.4	3.1		140			0.37
MIR2218-003	GL	BLAU	DANYUSHEVSKY, 1993; SUN, 2003	EMP; FTIR; LA-ICPMS	-15.6533	-174.817	53.43	1.22	10.49	5.87	14.96	11.55	2.7	0.45	0.16	0.17	1.6	65.8		13.4			0.62	83.8	5.08	3.21	1.17		4.18	1.92		4.84		0.48			2.6	9.85		1.25	2.05	20.9	37.3	3.25		162	0.16		0.53
MIR2218-004	GL	BLAU15	DANYUSHEVSKY, 1993; HONDA, 1993; LAYNE, 2009; SUN, 2003; ZHU, 2020	EMP; FTIR; ICPMS-ID; LA-ICPMS; MC-ICP-MS; MS; SIMS; TIMS	-15.6533	-174.817	49.7679	1.13641	9.15967	9.01309	15.2847	12.2677	2.71646	0.109663	0.0398776	0.139572	0.38	25.3		10			0.04	73	4.4	2.8	1		3.6	1.7		3.4		0.4		0.42	2	8.5		0.84	1.5	3	40.6	2.7		139			0.23
MIR2218-007	GL	BLAU	DANYUSHEVSKY, 1993; SUN, 2003; ZHU, 2020	EMP; FTIR; LA-ICPMS; MC-ICP-MS; TIMS	-15.615	-174.817	51.34	1.17	10.07	6.53	15.5	11.39	2.69	0.26	0.12	0.2	1.35	49.2		12.7			0.15	65.6	5.15	3.13	1.11		4.13	1.95		4.61		0.48			2.83	9.22		1.1	1.93	8.37	38	3.17		141	0.18		0.37
MIR2218-008	GL	BLAU	DANYUSHEVSKY, 1993; SUN, 2003; ZHU, 2020	EMP; FTIR; LA-ICPMS; MC-ICP-MS; TIMS	-15.6138	-174.817	50.9	1.26	8.74	5.99	15.47	10.62	2.93	0.37	0.12	0.14	1.31	38.3		9.3			0.29	87.7	3.89	2.42	0.91		3.23	1.47		3.25		0.36			1.96	7		0.77	1.43	10.4	41.6	2.49		135	0.13		0.32
MIR2218-009	GL	BLAU15	DANYUSHEVSKY, 1993; DRIL, 1997; HONDA, 1993; LAYNE, 2009; SUN, 2003	EMP; FTIR; LA-ICPMS; MS; SIMS	-15.612	-174.817	49.6459	1.20152	9.13758	8.19858	16.4981	11.7829	2.71603	0.111065	0.141355	0.201936	0.33	25.4		10			0.04	81.1	4.5	2.8	1		3.7	1.8		3.5		0.4		0.45	2.1	8.6		0.83	1.6	3	41.1	2.7		140			0.23
MIR2218-010	GL	BLAU	DANYUSHEVSKY, 1993; HONDA, 1993; LAYNE, 2009; SUN, 2003	EMP; FTIR; LA-ICPMS; MS; SIMS	-15.6092	-174.817	51.05	1.02	8.86	8.19	15.12	13.2	2.15	0.19	0.06	0.15	0.83	25.6		10			0.05	77	4.4	2.8	1		3.7	1.8		3.5		0.4			2.1	8.6		0.88	1.6	3.1	41.1	2.7		140	0.14		0.23
MIR2218-011	GL	BLAU	DANYUSHEVSKY, 1993; SUN, 2003	EMP; FTIR; LA-ICPMS	-15.6083	-174.817	50.96	1.03	8.8	8.14	15.09	13.16	2.41	0.17	0.07	0.17	0.71	34.6		10.2			0.14	87.2	4.42	2.76	0.98		3.66	1.64		3.56		0.41			2.12	7.62		0.84	1.58	6.65	41.6	2.69		135	0.14		0.28
MIR2218-012	GL	BLAU	DANYUSHEVSKY, 1993; SUN, 2003	EMP; FTIR; LA-ICPMS	-15.5993	-174.82	54.21	1.75	11.32	4.59	14.82	9.29	3.12	0.53	0.21	0.15	1.4	74.6		17.5			0.35	40.3	6.87	4.31	1.47		5.71	2.74		6.36		0.65			3.97	12.8		1.49	2.66	16.3	38	4.34		150	0.26		0.61
SSV0708-066	GL	BLAU	Jenner, 2012	EMPA, LA-ICPMS	-17.94	-176.36	50.4666	1.14146	10.9014	7.76829	15.0147	12.0108	2.17701	0.0725331	0.0683344	0.21077		11.343	0.25924	6.12847	50.6864	341.478	0.0154724	130.303	4.85347	3.23465	0.991628	17.53	3.62952	1.66798	1.08704	2.02172	5.74037	0.459309	1598.15	0.214986	1.48113	6.60566	110.21	0.415694	1.18021	1.26357	44.0893	2.49346	0.747789	83.7803	0.0899513	0.687757	0.118158
SSV1104-034-001	GL	BLAU	Escrig, 2012; JENNER, 2012; KELLER, 2008	EMP; FTIR; ICP-MS; MC-ICP-MS	-16.9568	-174.536	53.76	0.73	10.8	5.87	14.65	10.23	1.85	0.6	0.11	0.21	1.18	74.3008	0.249531	5.2977	33.8724	68.1623	0.202101	103.845	2.20404	1.4955	0.49718	12.7971	1.84371	0.664412	0.499413	2.11344	5.87877	0.267826		0.558869	0.615466	4.4277	36.3034	1.30729	0.865965	8.06384	38.2113	1.36893	0.26734	149.598	0.0449965	0.322295	0.216959
SSV1104-037-001	GL	BLAU17	Escrig, 2012; Keller, 2008	EMPA, ICP-MS, MC-ICP-MS; FTIR; LA-ICP-MS	-17.0168	-174.503	51.3159	0.587207	8.62148	7.04844	16.4263	12.6908	1.89145	0.328197	0.111472	0.151915	1.236	37.0564	0.279936	5.64771	39.1459	312.466	0.0907944	98.8089	2.42567	1.51438	0.580894	12.9097	2.07627	0.771512	0.530069	2.05313	4.31882	0.250957		0.1742	0.378715	5.02477	76.297	0.926319	0.948273	5.81401	41.6802	1.50009	0.401472	202.458	0.0350295	0.363238	0.165695
SSV1104-037-002	GL	BLAU17	Escrig, 2012; Keller, 2008	EMP; FTIR; ICPMS; SEM	-17.0168	-174.503	54.3	0.81	11.92	4.96	14.55	9.31	1.8	0.73	0.19	0.19	1.29	57.7391	0.297802	6.43022	38.0149	13.8754	0.177258	136.006	2.63212	1.7178	0.619682	13.4199	2.27701	0.805896	0.583087	2.46733	4.84044	0.288274		0.344366	0.519408	5.55917	32.6311	1.26857	1.05988	8.92408	38.0078	1.71979	0.326058	179.921	0.0625686	0.39342	0.234127
SSV1104-038-001	GL	BLAU	JENNER, 2012; KELLER, 2008	EMP; FTIR; LA-ICPMS; SEM	-17.5	-174.34	53.25	0.49	7.64	7.53	14.43	12.14	1.57	0.47			1.38	68	0.25	6.4	35	277	0.16	109	2.4	1.6	0.6		2.1	0.78		2.6	4	0.24		0.4	0.461	4.9	71	1.58	0.97	7.6	41	1.7	0.44	161	0.029		0.216
SSV1104-039-001	GL	BLAU17	Escrig, 2012; Keller, 2008	EMP; FTIR; ICPMS; SEM	-17.078	-174.536	52.9048	0.489654	10.095	6.49094	15.2329	11.2219	1.47127	0.347725	0.0958025	0.188835	1.312	44.474	0.193229	4.31116	40.7705	65.84	0.133374	115.306	1.97333	1.3257	0.449928	11.7265	1.63298	0.5664	0.449289	1.66086	4.25976	0.225954		0.310502	0.427264	3.70342	47.4467	0.871395	0.712516	5.46102	42.0822	1.17288	0.256509	143.397	0.0389345	0.291723	0.161721
SSV1104-040-001	GL	BLAU17	Escrig, 2012; Keller, 2008	EMPA, ICP-MS, MC-ICP-MS; FTIR; LA-ICP-MS	-17.0977	-174.525	52.6988	0.445785	9.66498	6.80951	15.6205	11.7026	1.4239	0.308306	0.0911321	0.160851	1.219	43.994	0.22012	4.24429	40.7242	67.4572	0.119129	107.342	1.95163	1.27529	0.440388	12.8473	1.61607	0.579655	0.432459	1.64496	4.14223	0.221892		0.30495	0.433857	3.69682	52.1893	0.938067	0.698328	5.26645	41.1847	1.15899	0.235812	139.678	0.0366432	0.288618	0.159567
SSV1104-041-001	GL	BLAU17	Escrig, 2012	EMPA, ICP-MS	-17.0776	-174.502	57.38	1	12.28	2.87	13.52	7.81	2.41	0.71	0.21	0.2		83.0832	0.367361	8.00875	36.4081	2.96104	0.233377	158.308	3.49181	2.2964	0.768867	14.892	2.9547	1.15704	0.780963	3.09158	6.76399	0.39056		0.500505	0.786168	6.82652	11.3915	1.49014	1.32275	10.0092	35.2899	2.15608	0.451577	171.218	0.057433	0.515152	0.297933
SSV1104-042-001	GL	BLAU17	Escrig, 2012; Keller, 2008	EMPA, ICP-MS, MC-ICP-MS; FTIR; LA-ICP-MS	-17.1162	-174.455	52.6708	0.576196	7.42763	7.32719	16.0023	12.0564	1.73575	0.524357	0.147745	0.143684	1.166	63.8018	0.275078	5.92326	38.8388	606.229	0.16643	95.7454	2.61276	1.66172	0.638606	12.1463	2.32862	0.818969	0.570921	2.27753	4.64916	0.267782		0.228299	0.463185	5.22964	151.672	1.45786	0.996848	8.52071	39.902	1.73314	0.326545	206.422	0.0542056	0.395541	0.208489
SSV1104-043-001	GL	BLAU17	Escrig, 2012; Keller, 2008	EMPA, ICP-MS, MC-ICP-MS; FTIR; LA-ICP-MS	-17.1124	-174.425	51.3121	0.667174	9.77585	6.9688	15.4903	12.2523	1.71496	0.543049	0.141787	0.221053	1.098	37.2754	0.317421	7.84035	38.5796	110.139	0.183189	137.612	2.73279	1.79126	0.647085	12.7248	2.33806	0.693277	0.610081	3.02981	5.10865	0.298697		0.201888	0.496917	6.55133	47.6525	1.12376	1.29258	10.9262	41.2797	1.86605	0.302764	189.236	0.0463852	0.402521	0.264181
SSV1104-044-001	GL	BLAU17	Escrig, 2012	EMPA, ICP-MS, MC-ICP-MS; FTIR	-17.2268	-174.565	53.6549	0.785657	10.7075	5.41375	14.8165	10.0107	2.01956	0.549625	0.135752	0.22478	1.361	48.6384	0.325367	6.34267	39.8019	17.3322	0.161152	134.874	2.84443	1.85632	0.654843	13.0621	2.43376	0.871207	0.639041	2.37148	5.07868	0.307299		0.212415	0.556421	5.65812	44.1469	1.13946	1.08041	9.04968	37.9863	1.80121	0.345668	171.396	0.0518168	0.422234	0.216121
SSV1104-045-001	GL	BLAU18	Escrig, 2012	EMPA, ICP-MS, MC-ICP-MS; FTIR	-17.4732	-174.592	53.0904	0.646957	8.66725	6.27192	16.1629	11.6232	1.74614	0.437784	0.109617	0.198947	1.338	55.5471	0.302269	6.3234	36.9522	382.235	0.122772	95.7636	2.35994	1.4986	0.58744	12.8974	2.03283	0.728593	0.517763	2.43183	4.5646	0.24881		0.231236	0.573164	5.14372	106.001	1.0125	1.01939	6.84166	41.9437	1.52101	0.331909	220.44	0.0467676	0.353084	0.194247
SSV1104-046-001	GL	BLAU18	Escrig, 2012; Keller, 2008	EMPA, ICP-MS, MC-ICP-MS; FTIR; LA-ICP-MS	-17.5354	-174.574	53.3896	0.645912	9.96475	6.42578	14.9069	10.8704	1.73101	0.573678	0.119784	0.188023	0.755	84.0527	0.317557	5.99251	35.6144	49.5328	0.201486	108.152	2.52208	1.59089	0.613989	13.9969	2.2275	0.786197	0.549529	2.3358	4.59003	0.265812		0.384345	0.532756	5.22936	39.359	1.60416	0.992945	8.49019	41.0108	1.65504	0.339459	211.296	0.0415224	0.381821	0.218577
SSV1104-047-001	GL	BLAU18	Escrig, 2012; Keller, 2008	EMPA, ICP-MS, MC-ICP-MS; FTIR; LA-ICP-MS	-17.6295	-174.578	53.4688	0.612165	8.04443	6.54024	16.0751	11.4951	1.92706	0.513299	0.10736	0.146512	1.75	75.316	0.324563	5.9751	41.2409	453.883	0.157028	84.0901	2.38797	1.54205	0.582735	12.886	2.05873	0.817762	0.527259	2.37357	4.471	0.255034		0.317564	0.565162	5.02732	202.203	1.37206	0.967543	7.50952	38.1503	1.56237	0.431482	165.601	0.0443354	0.358513	0.237109
SSV1104-048-001	GL	BLAU18	Escrig, 2012; Keller, 2008	EMPA, ICP-MS, MC-ICP-MS; FTIR; LA-ICP-MS	-17.5631	-174.579	51.2858	0.525719	8.29729	7.48648	15.8925	13.0549	1.47703	0.536055	0.134717	0.151915	1.123	68.8863	0.240116	5.0342	36.0805	245.907	0.15769	96.984	2.16587	1.32561	0.565541	12.6637	1.97135	0.628741	0.462491	1.92263	3.93429	0.212243		0.216324	0.418044	4.52268	81.0173	1.31308	0.843416	8.16596	43.0193	1.45693	0.308877	207.203	0.0348049	0.330019	0.181008
SSV1104-056-001	GL	BLAU	KELLER, 2008	EMP; FTIR; LA-ICPMS; SEM	-17.1	-174.31	54	0.4	8.38	7.26	14.62	11.87	1.45	0.32			1.16	54	0.17	3.9	37	286	0.14	112	1.8	1.2	0.43		1.5	0.54		1.5	3.8	0.19		0.44	0.36	3.1	59	1.01	0.62	5.2	42	1.1	0.34	139	0.025		0.15
SSV1104-057-001	GL	BLAU17	Escrig, 2012; Keller, 2008	EMPA, ICP-MS, FTIR; LA-ICP-MS	-17.0187	-174.52	54.1886	0.413599	8.52778	7.44389	14.7944	11.8316	1.43387	0.298437	0.0845313	0.170813	1.182	53.1239	0.219038	3.91964	38.4072	411.248	0.127044	94.503	1.79794	1.1752	0.42266	11.6628	1.5005	0.554044	0.40477	1.5031	4.35875	0.203737		0.352558	0.42124	3.41772	82.0524	0.979113	0.646772	5.05171	43.7701	1.07527	0.208311	132.928	0.0365623	0.265878	0.14348
SSV1104-058-001	GL	BLAU16	Escrig, 2012	EMPA, ICP-MS, MC-ICP-MS; FTIR	-16.8945	-174.524	55.413	0.593769	11.1486	4.50328	15.4906	9.70424	1.63059	0.526181	0.117978	0.205116	1.296	84.6245	0.262451	5.61154	38.3044	8.23157	0.203543	181.122	2.17624	1.44837	0.533594	14.4569	1.90627	0.678786	0.485436	2.22276	5.83652	0.260687		0.359279	0.611836	4.754	22.8223	1.59163	0.916735	8.65681	39.9133	1.43367	0.286924	180.668	0.0497414	0.330801	0.225188
SSV1104-059-001	GL	BLAU16	Escrig, 2012	EMPA, ICP-MS, MC-ICP-MS; FTIR	-16.8092	-174.535	57.4721	0.504834	8.9577	4.29704	15.5396	9.48284	1.98211	0.719554	0.176308	0.150718	1.293	101.34	0.365922	7.48342	32.574	96.9354	0.261155	97.3526	2.36236	1.55951	0.581241	13.2956	2.12495	0.81373	0.530747	3.03393	6.56149	0.271185		0.499729	0.781445	5.98867	32.6324	1.77694	1.20482	11.3382	37.0925	1.70939	0.309772	206.258	0.0538655	0.361443	0.298087
SSV1104-060-001	GL	BLAU16	Escrig, 2012	EMPA, ICP-MS; FTIR	-16.7483	-174.522	54.3956	0.463978	8.62265	6.53025	15.803	11.0787	1.51412	0.464744	0.123876	0.175814	1.512	66.06	0.284083	5.61652	35.8178	221.691	0.186817	108.321	1.9122	1.26684	0.490085	12.7423	1.6848	0.626507	0.426506	2.25545	4.98382	0.217954		0.40969	0.657931	4.64652	73.171	1.25319	0.921013	8.1771	40.303	1.34662	0.248774	184.046	0.0509496	0.289065	0.229074
SSV1104-062-001	GL	BLAU16	Escrig, 2012	EMPA, ICP-MS, MC-ICP-MS; FTIR	-16.666	-174.551	54.6457	0.435036	8.67471	7.18782	14.6554	11.4559	1.35023	0.480207	0.128023	0.14439	1.117	72.6006	0.257568	6.36386	36.4659	185.915	0.1969	101.285	1.78681	1.15164	0.471013	12.4894	1.63458	0.620918	0.39097	2.63758	4.74336	0.209906		0.387191	0.751707	4.90838	81.9128	1.28364	0.995093	8.66359	42.6961	1.34543	0.272434	188.492	0.055939	0.27382	0.283203
SSV1104-063-001	GL	BLAU	Escrig, 2012	EMPA, ICP-MS, MC-ICP-MS	-16.6516	-174.558	53.8617	0.575374	9.08929	6.36051	15.6922	11.037	1.69412	0.443935	0.117978	0.175814		73.9137	0.338354	6.94572	37.0394	96.5922	0.165785	109.893	2.31073	1.52249	0.562788	13.1344	2.01691	0.840441	0.517163	2.85323	5.18642	0.260093		0.327977	1.28654	5.4376	45.5553	1.08334	1.09095	8.52788	37.783	1.55274	0.339363	147.061	0.0900225	0.351473	0.335751
SSV1104-064-001	GL	BLAU16	Escrig, 2012	EMPA, ICP-MS, MC-ICP-MS; FTIR	-16.6687	-174.586	54.8488	0.566087	8.73779	7.98425	14.0647	10.1896	1.71496	0.57453	0.119149	0.176842	1.526	87.2036	0.361279	7.32968	41.9119	452.639	0.198176	94.6283	2.44537	1.59268	0.610125	12.476	2.20568	0.861456	0.544329	2.99249	5.14694	0.278056		0.288964	0.948987	6.04917	138.461	1.63807	1.18264	10.2901	36.7807	1.77387	0.353819	181.704	0.0702341	0.373851	0.314378
SSV1104-066-001	GL	BLAU	Escrig, 2012	EMPA, ICP-MS, MC-ICP-MS; FTIR	-16.4775	-174.629	53.55	0.465	7.69974	7.56612	15.5907	12.242	1.45512	0.407286	0.0941277	0.165789	1.292	58.0623	0.209375	4.80728	44.141	732.407	0.111723	92.3387	1.69026	1.12011	0.417742	10.6917	1.45179	0.517104	0.377935	1.91173	3.87854	0.192788		0.204193	0.878192	3.86713	219.971	0.894765	0.762906	6.6303	42.0269	1.14157	0.241258	124.357	0.0980038	0.25414	0.198648
SSV1104-068-001	GL	BLAU16	Escrig, 2012	EMPA, ICP-MS, MC-ICP-MS; FTIR	-16.4505	-174.519	53.3248	0.496175	8.17982	8.52184	14.0521	11.9633	1.36098	0.512871	0.126596	0.155442	1.508	73.2135	0.345675	6.89481	39.2768	535.096	0.194584	94.0339	1.96081	1.21703	0.540311	11.6702	1.82536	0.67462	0.418679	2.72374	4.33665	0.207644		0.33267	0.818815	5.66232	127.513	1.19058	1.12242	10.6964	41.7307	1.56287	0.28265	191.153	0.0628292	0.30313	0.280807
SSV1104-069-001	GL	BLAU	KELLER, 2008; KENDRICK, 2019	EMP; IMP; LA-ICPMS; SEM	-15.36	-174.49	49.73	1.1	8.95	6.75	15.48	11.41	2.64	0.32				38.8	0.55	10.1	41	222	0.28	65	4.37	2.8	1.01		3.68	1.77		3.6	5.8	0.41			2.05	8.52	68	0.86	1.6	9.72	36	2.8		139	0.13	0.66	0.34
SSV1104-069-002	GL	BLAU	BRENS, 2018; KELLER, 2008	EMP; LA-ICPMS; MC-ICP-MS; SEM	-15.36	-174.49	50.13	0.95	8.57	7.04	15.76	11.71	2.44	0.35				41	0.52	9.1	39	233	0.34	74	3.8	2.4	0.92		3.2	1.4		3.3	5.6	0.34			1.87	7	69	0.72	1.4	10.9	35	2.5		144	0.116		0.36
SSV1104-070-001	GL	BLAU15	Langmuir unpub	ICP-MS	-15.863	-174.849												23.9224	0.4209	6.4548	41.038	337.83	0.0805	76.6798	3.4675	2.1824	0.7691	14.1752	2.9258	1.3535	0.762	2.1679	4.709	0.3359	0.1498	0.2613	1.3631	5.9405	110.404	0.558	1.1102	4.403	38.4113	1.9943	0.4961	122.084		0.517	0.1741
WASPPTU-4-003-001	GL	BLAU	HAHM, 2012; HANAN, 2013; TIAN, 2011	EMP; ICPMS; ICP-OES; MC-ICP-MS; MS; SIMS; TIMS	-15.3867	-174.678	55.9	1.85	13.49	2.14	13.16	6.26	4.03	0.56	0.39	0.28	1.92	106		31.9		1			12	7.33	2.1			5.13	2.53	11.5		2.13			6.71	24.7	5	2.36	4.54	16.1		7.94		148		1.78	0.8
WASPPTU-4-003-003	GL	BLAU	TIAN, 2011	EMP; ICPMS; ICP-OES	-15.3867	-174.678	55.33	1.97	13.85	2.25	13.1	6.27	3.94	0.55	0.33	0.28		55.8		24.8		6			11.7	7.55				3.79	2.52	12.3		0.9				25.1	30	1.55	4.54	11.6		7.36		92		1.79	0.22
WASPPTU-4-004-001	GL	BLAU	HAHM, 2012; HANAN, 2013; TIAN, 2011	EMP; ICPMS; ICP-OES; MC-ICP-MS; MS; SIMS; TIMS	-15.7967	-174.578	49.16	0.98	9.31	6.58	16.03	12.62	2.13	0.61	0.17	0.18	1.76	65.4		10.8		382			3	1.79	0.93			1.77	0.64	4.51		0.24			4.19	7.96	105	0.57	1.54	9.45		2.43		196		0.5	0.3
WASPPTU-4-009-003	GL	BLAU	TIAN, 2011	EMP; ICPMS; ICP-OES	-15.41	-174.69	55.61	1.28	9.12	1.76	13.67	5.39	2.05	1.76	0.36	0.17		135		44.5		13			12.8	8.95	2.05			6.44	2.69	17.9					12.6	31	6	2.14	6.12	24.5		8.69		133		1.89	1.64
WASRNDB-017-002	GL	BLAU	HANAN, 2013; TIAN, 2011	EMP; ICPMS; ICP-OES; MC-ICP-MS; TIMS	-15.5433	-174.785	58.82	1.33	10.36	1.89	14.6	5.57	4.62	0.85	0.39	0.25		157		37.9		36			11.5	7.2	1.97			5.2	2.3	14.1					8.85	26.5	12		5.2	23.6		7.64		142
WASRNDB-019-001	GL	BLAU	HAHM, 2012; HANAN, 2013; TIAN, 2011	EMP; ICPMS; ICP-OES; MC-ICP-MS; MS; SIMS; TIMS	-15.6883	-174.805	50.48	0.9	8.69	7.63	15.76	13.18	2.11	0.21	0.1	0.18	0.92	25.3		9.22		363			4.09	2.39				1.75	0.88	3.24		0.24			1.88	8.11	97	0.74	1.5	6.47		2.73		179		0.55	0.13
WASRNDB-019-004	GL	BLAU	HANAN, 2013; TIAN, 2011	EMP; ICPMS; ICP-OES; MC-ICP-MS; TIMS	-15.6883	-174.805	50.57	0.94	8.56	7.6	15.73	13.21	2.15	0.21	0.09	0.2		18.9		1.54		322			0.86	0.67					0.22	0.58						1.4	77		0.25	3.57		0.49
WASRNDB-020-001	GL	BLAU	HAHM, 2012; TIAN, 2011	EMP; ICPMS; ICP-OES; MS; SIMS; TIMS	-15.44	-174.685	60.04	1.23	10.59	1.44	13.87	5.04	4.54	0.77	0.36	0.22	1.54	165		49.6		4			15.7	10.2	2.52			8.67	3.35	19.9		1.36			12.51	35.1	6	2.21	7.42	33.2		10.3		139		2.32	1.61
WASRNDB-020-007	GL	BLAU	HAHM, 2012; HANAN, 2013; TIAN, 2011	EMP; ICPMS; ICP-OES; MC-ICP-MS; MS; SIMS; TIMS	-15.44	-174.685	60.59	1.17	9.84	1.46	14.26	5.13	4.83	0.95	0.36	0.26	1.46	156		50.7		6			14.7	9.76	2.6			8.61	3.3	19.7		1.41			11.75	34.8	9	2.9	7.14	31.5		9.9		126		2.23	1.54
WASRNDB-021-003	GL	BLAU	HAHM, 2012; HANAN, 2013; TIAN, 2011	EMP; ICPMS; ICP-OES; MC-ICP-MS; MS; SIMS	-15.375	-174.56	54.94	2.29	12.86	2.76	13.57	6.88	3.94	0.69	0.33	0.26	1.81	107		32.7		1			10.1	6.5	1.84			5.21	2.18	13.1		0.8			8.56	24	5	1.9	4.76	23.2		6.84		162		1.5	0.81
WASRNDB-022-001	GL	BLAU	HAHM, 2012; HANAN, 2013; TIAN, 2011	EMP; ICPMS; ICP-OES; MC-ICP-MS; MS; SIMS; TIMS	-15.3417	-174.612	57.69	1.4	11.12	2.47	13.72	6.39	4.34	0.66	0.24	0.23	1.52	107		33.8		3			11.2	7.26	2.03			6.23	2.49	12.8		0.92			8.32	24.8	11	1.94	4.8	22.6		7.35		124		1.75	0.9
WASRNDB-044-002	GL	BLAU	HAHM, 2012; HANAN, 2013; TIAN, 2011	EMP; ICPMS; ICP-OES; MC-ICP-MS; MS; SIMS; TIMS	-15.8617	-174.852	49.53	0.82	8.03	8.13	16.61	12.89	2.03	0.15	0.08	0.16	1.05	23.1		4.89		353			3.06	1.98	0.74			1.51	0.69	1.64		0.29			1.25	5.39	102	0.27	0.82	1.94		2.01		101		0.43	0.11
WASRNDB-045-002	GL	BLAU	HAHM, 2012; HANAN, 2013; TIAN, 2011	EMP; ICPMS; ICP-OES; MC-ICP-MS; MS; SIMS; TIMS	-15.6117	-174.808	52.92	1.81	11.52	3.92	14.54	8.46	3.39	0.52	0.22	0.23	1.77	72.3		18.4		8			6.41	3.79	1.14			3.28	1.46	6.61		0.42			4.17	14.5	14	1.41	2.83	13.6		4.53		154		0.91	0.6
WASRNDB-047-008	GL	BLAU	HAHM, 2012; HANAN, 2013; TIAN, 2011	EMP; ICPMS; ICP-OES; MC-ICP-MS; MS; SIMS; TIMS	-15.3033	-174.437	50.21	1	8.83	6.54	16.08	12.17	2.52	0.39	0.13	0.18	1.54	60.6		13.2		139			3.79	2.28				1.76	0.83	5.27		0.19			4.1	9.55	60	0.82	1.84	10.2		2.95		196		0.53	0.45
ALV1846-009	GL	BMRN8	HAWKINS, 1990; VOLPE, 1990; STOLPER, 1994; YI, 2000, NEWMAN, 2000	XRF; AAS; INAA; MS-ID; FIS; MC-ICP-MS; EMP;FTIR	18.33	144.67	49.67	0.57	7.03	6.95	17.45	13.46	2.07	0.71	0.13	0.16	1.89	49			69	198										8.2					1	10.46	115	1.2		21.38		2.26	0.56	341	0.054		0.53
ALV1846-012	GL	BMRN8	HAWKINS, 1990; VOLPE, 1990; STOLPER, 1994; YI, 2000, NEWMAN, 2000	XRF; AAS; INAA; MS-ID; FIS; MC-ICP-MS; EMP;FTIR	18.33	144.67	50.7847	1.1476	7.69442	7.29343	17.3292	11.3291	2.8874	0.402285	0.181028	0.150857	1.55	33			32	247										6.09					3	10.15	108	0.85		6.06		2.97	0.9	221.1	0.29		0.54
HAKGH88-1-010-008	GL	BMRN8	PEARCE, 2005	ICP-MS	18.15	144.73												39		13.49	33.5	285	0.05	56	4.36	2.61	1.15	15	3.87	2.34	0.92	5.4		0.4			3.87	10.7	107	0.5	2.18	4.3	32.1	3.17		194	0.255	0.66	0.399
HAKGH88-1-010-009	GL	BMRN8	IKEDA, 1998; NEWMAN, 2000; PEARCE, 2005	CALC; EMP; FTIR; ICPMS; MS	18.15	144.73	51.6125	1.2188	7.54445	7.49409	16.771	10.9994	2.99159	0.37269	0.100727		1.2	38		15.33	35.3	286	0.05	67	4.41	2.63	1.19	16.3	3.96	2.27	0.93	6.42		0.4			3.26	11.65	109	0.5	2.44	4	34.1	3.32		205	0.215	0.67	0.487
HAKGH88-1-010-010	GL	BMRN8	IKEDA, 1998; NEWMAN, 2000; PEARCE, 2005	CALC; EMP; FTIR; ICPMS; MS	18.15	144.73	51.4954	1.26209	7.59259	7.58258	16.6075	10.9982	3.015	0.370615	0.180299		1.13	36		14.41	34.4	291	0.04	61	4.38	2.62	1.17	15.6	3.91	2.31	0.92	5.91		0.4			3.57	11.17	108	0.4	2.31	4	33.1	3.25		200	0.235	0.66	0.443
HAKGH88-1-010-011	GL	BMRN8	PEARCE, 2005	ICP-MS	18.15	144.73												35		12.74	33.8	284	0.04	67	4.29	2.61	1.14	14.8	3.75	2.16	0.92	5.04		0.39			3	10.28	55	0.3	2.08	3.9	37.1	3.09		188	0.203	0.65	0.38
SON0069-018-001-6	GL	BMRN4	MELSON, 2003; NEWMAN, 2000; PEARCE, 2005	EMP; FTIR; ICPMS	16.1722	144.786	50.92	0.97	8.02	6.66	16.77	12.09	2.44	0.32	0.12		2.03	66		9.44	33.9	238	0.1	69	3.82	2.33	0.9	14.6	3.11	1.57	0.78	3.94		0.34			2.38	7.51	75	0.7	1.53	5	35.4	2.45		210	0.152	0.56	0.415
SON0069-022-002-2	GL	BMRN6	MELSON, 2003; NEWMAN, 2000; PEARCE, 2005	EMP; FTIR; ICPMS	16.9563	144.783	48.8993	1.39369	9.62414	7.40477	17.2759	10.5885	3.74659	0.219309	0.13956		0.48	17		11.84	44.3	222	0.01	102	3.97	2.43	1.06	16	3.3	2.26	0.84	4.71		0.37			4.38	8.4	120	0.5	1.78	1.4	32.2	2.57		269	0.292	0.59	0.236
SON0069-074-002-1	GL	BMRN5	MELSON, 2003; NEWMAN, 2000; PEARCE, 2005	EMP; FTIR; ICPMS	16.53	144.85	51.37	0.89	7.01	6.93	17.24	11.82	2.4	0.28	0.13		2.08	71		9.5	35.1	236	0.11	72	3.32	2.01	0.86	14.5	2.83	1.43	0.71	4		0.32			2.51	7.24	109	0.9	1.46	5.1	32.2	2.22		203	0.164	0.5	0.45
SON0069-074-002-3	GL	BMRN5	MELSON, 2003; NEWMAN, 2000; PEARCE, 2005	EMP; FTIR; ICPMS	16.53	144.85	50.78	1.05	7.96	6.29	16.72	12	2.69	0.32	0.18		2.16	51		12.04	34.7	142	0.1	93	3.63	2.18	1.02	14.3	3.28	1.7	0.77	4.86		0.32			2.41	9.23	53	0.7	1.92	6.3	34.2	2.83		306	0.162	0.55	0.399
SON0069-074-003-1	GL	BMRN5	MELSON, 2003; NEWMAN, 2000; PEARCE, 2005	EMP; FTIR; ICPMS	16.53	144.85	51.4961	1.25695	8.07344	7.40312	16.6702	10.9627	2.86692	0.300668	0.170378		1.4	57		12.87	38	311	0.05	50	4.42	2.67	1.08	15.3	3.84	2.25	0.94	5.04		0.4			4.87	9.88	148	0.7	2	3.6	30.8	3.1		182.78	0.31	0.69	0.481
SON0069-079-001-1	GL	BMRN4	PEARCE, 2005	ICP-MS	16.0795	144.784	50.9496	0.93778	7.08113	8.21491	17.7225	11.4411	2.60595	0.230566	0.140344			50		7.99	37.6	273	0.08	54	3.47	2.1	0.86	14.2	2.89	1.62	0.75	3.13		0.31			2.22	7.07	164	0.9	1.34	4	27.7	2.34		154	0.136	0.55	0.336
SON0069-079-002-2	GL	BMRN4	MELSON, 2003; NEWMAN, 2000; PEARCE, 2005	EMP; FTIR; ICPMS	16.0795	144.784	50.4089	1.19797	8.18412	7.6913	16.8799	11.2272	3.27228	0.271243	0.110507		1.09	39		11.28	37.4	258	0.06	68	4.19	2.5	1.07	15.4	3.56	2.17	0.87	4.32		0.37			3.59	9.26	117	0.6	1.82	3.4	32.1	2.95		202	0.267	0.65	0.358
SON0069-080-023-2	GL	BMRN	MELSON, 2003; NEWMAN, 2000; PEARCE, 2005	EMP; FTIR; ICPMS	15.7632	144.75	50.59	0.94	7.62	7.4	17.13	12.48	2.43	0.24	0.11		1.52	41		8.01	35.4	367	0.07	68	3.34	2.13	0.84	14.4	2.79	1.45	0.73	3.16		0.32			2.35	6.56	99	0.7	1.31	3.2	33	2.16		165	0.178	0.52	0.31
SON0069-080-025-3	GL	BMRN	MELSON, 2003; NEWMAN, 2000; PEARCE, 2005	EMP; FTIR; ICPMS	15.7632	144.75	53.84	1.46	8.96	4.58	16.16	8.96	3.28	0.63	0.21		2.78	90		18.41	27	111	0.22	43	5.38	3.32	1.36	17.2	4.74	2.77	1.16	7.32		0.52			3.74	13.48	49	1.5	2.81	9.7	30.8	3.98		214	0.249	0.83	0.841
SON0069-084-001-1	GL	BMRN3	MELSON, 2003; NEWMAN, 2000; PEARCE, 2005	EMP; FTIR; ICPMS	14.9978	144.493	50.3488	1.6103	9.92276	7.30273	15.1475	11.5798	3.42597	0.0594849	0.128884		0.2	5		8.04	41.6	339		70	5.58	3.43	1.24	15.9	4.47	2.48	1.17	2.17		0.5			1.16	9.48	99	0.4	1.61	0.3	37.2	3.53		100	0.078	0.84	0.08
SON0069-084-002-1	GL	BMRN3	MELSON, 2003; NEWMAN, 2000; PEARCE, 2005	EMP; FTIR; ICPMS	14.9978	144.493	50.758	1.51322	9.49163	7.43953	15.2556	11.499	3.34353	0.069622	0.14919		0.21	5		8.24	40.1	320	0.01	76	5.41	3.23	1.26	15.7	4.44	2.44	1.15	2.15		0.47			1.14	9.61	78	0.4	1.66	0.4	35.9	3.45		97	0.075	0.84	0.082
SON0069-086-004-1	GL	BMRN3	MELSON, 2003; NEWMAN, 2000; PEARCE, 2005	EMP; FTIR; ICPMS	15.0883	144.495	50.7373	1.87911	10.1187	5.85713	14.953	10.5506	4.20256	0.449491	0.189785		0.58	37		17.63	41.2	141	0.05	71	5.4	3.22	1.46	17.5	4.82	3.05	1.14	6.62		0.48			7.04	13.56	44	1.1	2.79	3.4	41.7	4.01		215	0.456	0.84	0.43
SON0069-086-006-1	GL	BMRN3	PEARCE, 2005	ICP-MS	15.0883	144.495	50.9435	1.75546	9.71574	6.62391	15.248	10.7027	3.80396	0.258132	0.178707			29		16.08	38.7	132	0.03	71	5.87	3.45	1.43	17.3	4.89	3.17	1.25	5.83		0.51			5.77	12.91	51	0.8	2.56	2.3	37.5	4.13		197	0.35	0.89	0.362
SON0069-088-001-2	GL	BMRN3	MELSON, 2003; NEWMAN, 2000; PEARCE, 2005	EMP; FTIR; ICPMS	15.2967	144.526	50.77	1.68	8.86	6.18	16.12	10.55	3.56	0.31	0.2		1.3	41		16.61	36	205	0.06	62	5.73	3.54	1.38	17.1	5.01	3.07	1.23	6.36		0.54			6.12	12.97	73	0.9	2.65	3.5	33.3	4.17		197	0.378	0.89	0.474
SON0069-088-002-1	GL	BMRN3	MELSON, 2003; NEWMAN, 2000; PEARCE, 2005	EMP; FTIR; ICPMS	15.2967	144.526	50.6318	1.39262	8.64205	6.98611	16.8209	11.0359	3.27908	0.280973	0.150521		1.04	40		15.02	38	267	0.1	58	5.11	3.1	1.31	17.4	4.42	2.72	1.09	5.59		0.48			5.09	11.78	84	0.7	2.39	4.2	36.6	3.6		208	0.335	0.79	0.41
SON0069-088-003-1	GL	BMRN3	MELSON, 2003; NEWMAN, 2000; PEARCE, 2005	EMP; FTIR; ICPMS	15.2967	144.526	49.96	1.3	8.41	6.86	17.02	11.08	3.17	0.28	0.16		1.24	29		13.38	36.8	280	0.07	56	4.55	2.76	1.18	16.3	3.94	2.43	0.97	5.01		0.43			4.47	10.52	174	0.7	2.14	3.7	33.5	3.2		201	0.297	0.7	0.368
SON0069-G071-001-7	GL	BMRN6	GRIBBLE, 1996; NEWMAN, 2000; PEARCE, 2005	EMP; FTIR; ICPMS	16.9852	144.834	49.482	0.932148	7.78975	8.07886	16.8484	13.1229	2.60856	0.261953	0.141051		1.34	44		9.33	38.3	262	0.04	69	3.21	1.93	0.9	14	2.7	1.57	0.67	3.68		0.28			3.56	7.48	72	0.6	1.49	2.8	38.5	2.36		232	0.236	0.49	0.306
SON0069-G075-001-1	GL	BMRN5	GRIBBLE, 1996; NEWMAN, 2000; PEARCE, 2005	EMP; FTIR; ICPMS	16.4048	144.85	51.1861	1.10476	8.17196	6.55526	17.0658	11.2542	2.86255	0.512224	0.170741		2.21	103		14.64	31.7	249	0.2	67	4.01	2.38	1.08	15.4	3.6	1.83	0.82	6.48		0.37			3.3	10.6	72	1.4	2.27	10.4	33.9	3.11		284	0.212	0.62	0.778
THO0192-066-005	GL	BMRN13	PEARCE, 2005	ICP-MS	21.78	143.1	50.61	0.91	7.857	7.12	16.33	12.43	2.36	0.32				123		11.99	41.6	392	0.11	67	3.03	1.81	0.86	13.4	2.75	1.37	0.64	5.71		0.27			1.53	8.24	152	1.3	1.78	4.5	38	2.31		239	0.077	0.48	0.756
THO0192-066-006	GL	BMRN13	PEARCE, 2005	ICP-MS	21.78	143.1	51.09	0.92	8.478	6.63	16.36	11.74	2.49	0.33				121		11.42	39.2	386	0.1	61	2.9	1.74	0.82	13	2.63	1.3	0.61	5.37		0.26			1.46	7.85	144	1.4	1.68	4.5	36.6	2.2		237	0.074	0.46	0.683
THO0192-067-008	GL	BMRN13	PEARCE, 2005	ICP-MS	21.83	143.05	51.84	1.07	7.191	6.37	16.65	11.57	2.73	0.38				87		13.32	39.4	399	0.09	56	3.51	2.11	0.95	13.7	3.15	1.89	0.74	5.8		0.32			3.74	9.49	209	1.1	2.02	6.2	33.2	2.65		206	0.226	0.56	0.56
THO0192-068-001	GL	BMRN13	PEARCE, 2005	ICP-MS	21.7	143.17	51.97	1.15	7.344	6.31	16.54	11.22	2.76	0.59				102		17.44	37.9	346	0.13	56	3.59	2.13	1.04	14.9	3.34	2.05	0.75	8.67		0.33			5.34	11.22	184	1.3	2.48	9	32.9	2.95		302	0.327	0.58	0.884
THO0192-068-003	GL	BMRN13	PEARCE, 2005	ICP-MS	21.7	143.17	51.66	1.04	7.047	6.6	16.53	11.42	2.63	0.55				96		16.87	38.6	361	0.11	61	3.6	2.15	1.04	14.7	3.34	2.06	0.76	7.95		0.33			5.05	11.02	186	1.2	2.43	7.6	33.6	2.92		275	0.307	0.58	0.821
WASTUNE-7-046-001-6	GL	BMRN12	GRIBBLE, 1998; IKEDA, 1998; MELSON, 2003; NEWMAN, 2000; PEARCE, 2005	CALC; EMP; FTIR; ICPMS; MS; MS-ID	20.82	143.55	51.3252	1.15412	7.92264	7.34205	16.9226	11.4602	2.82555	0.220527	0.150359		1.41	45.8		10.8	34.7	255	0.05	67	4.33	2.7	1.08	15.6	3.82	2.04	0.92	3.79		0.39			2.62	8.83	222	0.749	1.71	3.01	36	2.82		174	0.177	0.67	0.331
WASTUNE-7-046-001-8	GL	BMRN12	GRIBBLE, 1998; PEARCE, 2005	MS-ID; ICP-MS	20.82	143.55	52.2152	1.20523	7.6563	7.52644	16.6275	11.1888	2.56306	0.210432	0.150308			45.8		11.7	39.3	289	0.06	71	4.72	3.03	1.17	16.3	4.22	2.12	0.98	4.43		0.42			2.65	9.55	150	0.71	1.82	3.17	37.6	3.06		183	0.185	0.73	0.353
WASTUNE-7-047-001-5	GL	BMRN12	GRIBBLE, 1998; IKEDA, 1998; MELSON, 2003; NEWMAN, 2000; PEARCE, 2005	CALC; EMP; FTIR; ICPMS; MS; MS-ID	20.97	143.44	51.2961	0.993313	7.67003	7.64338	16.6414	12.0648	2.61651	0.241564	0.130847		1.76	58.3		10.7	36.7	259	0.06	74	3.73	2.31	0.98	15.2	3.3	1.73	0.81	4.1		0.35			2.19	8.28	119	0.838	1.71	3.81	37.1	2.56		187	0.159	0.6	0.492
WASTUNE-7-048-001-3	GL	BMRN12	GRIBBLE, 1998; MELSON, 2003; NEWMAN, 2000; PEARCE, 2005	CALC; EMP; FTIR; ICPMS; MS; MS-ID	21.31	143.36	50.5756	0.700277	7.09653	7.75261	16.8921	13.0581	2.2172	0.490867	0.150265		1.56	150		19.5	33.6	218	0.13	102	2.54	1.5	0.865	13.2	2.78	1.26	0.51	9.86		0.21			3.05	10.7	82	1.64	2.48	9.29	37.2	2.35		365	0.178	0.43	1.499
WASTUNE-7-048-003-1	GL	BMRN12	GRIBBLE, 1998; PEARCE, 2005	MS-ID; ICP-MS	21.31	143.36	51.7	0.74	6.74	7.1	16.5	12.75	1.97	0.5	0.15			161		18.6	30.5	254	0.16	98	2.49	1.44	0.963	12.5	2.52	1.2	0.5	9.3		0.2			2.69	10.2	69	4.02	2.37	10.3	34.8	2.43		406	0.158	0.41	1.432
WASTUNE-7-050-001-5	GL	BMRN14	PEARCE, 2005	ICP-MS	22.38	142.79												1		8.14	36.9	34	0.18	121	2.56	1.6	0.7	15.4	2.14	0.96	0.54	3.65		0.26			0.74	5.93	41	1.6	1.11	4.7	41.3	1.79		298		0.39	0.38
WASTUNE-7-051-001-1	GL	BMRN14	GRIBBLE, 1998; PEARCE, 2005	MS-ID; ICP-MS	22.49	142.67	54.1081	1.46434	9.634	4.96761	15.8461	9.44481	3.33033	0.270847	0.15047			123		11.3	37.3	35	0.13	49	4.22	2.59	1.11	15.4	4.02	1.97	0.9	4.37		0.39			1.72	9.16	39	1.4	1.85	3.85	33.5	2.86		232	0.117	0.65	0.513
WASTUNE-7-053-001-1	GL	BMRN14	PEARCE, 2005	ICP-MS	22.69	142.45												196		19.53	32.8	19	0.21	92	4.16	2.6	1.18	19.7	3.66	1.79	0.88	10.01		0.42			2.41	12.32	45	2.2	2.5	10	41.3	3.28		355		0.64	1.596
WASTUNE-7-054-001-1	GL	BMRN14	GRIBBLE, 1998; MELSON, 2003; NEWMAN, 2000; PEARCE, 2005	CALC; EMP; FTIR; ICPMS; MS; MS-ID	22.79	142.42	50.6	0.99	7.69	6.53	17.26	11.85	2.81	0.39	0.15		1.69	99.7		18.7	34.3	166	0.14	87	3.46	2.03	1.1	14	3.48	1.73	0.69	8.12		0.28			2.48	11.4	69	1.39	2.49	9.1	35.6	2.91		313	0.167	0.55	1.089
WASTUNE-7-055-001-1	GL	BMRN	GRIBBLE, 1998; MELSON, 2003; NEWMAN, 2000	CALC; EMP; FTIR; MS; MS-ID	22.87	142.32	71.67	0.53	3.74	0.49	13.29	2.34	4.8	1.52	0.1		1.79	580		41.9					7.78	5.27	1.63		6.93			19.6						23.9		6.94		23.2		5.96		243
WASTUNE-7-068-001-2	GL	BMRN12	GRIBBLE, 1998; IKEDA, 1998; MELSON, 2003; NEWMAN, 2000; PEARCE, 2005	CALC; EMP; FTIR; ICPMS; MS; MS-ID	21.35	143.28	52.48	1.01	7.51	6.26	16.53	11.07	2.86	0.43	0.18		1.84	107		19.8	32.4	158	0.1	69	3.66	2.26	1.15	14.8	3.54	1.96	0.77	8.61		0.32			3.68	12	57	2.06	2.71	7.37	35.2	3.07		310	0.24	0.6	1.051
WASTUNE-7-071-001-14	GL	BMRN11	GRIBBLE, 1998; MELSON, 2003; NEWMAN, 2000; PEARCE, 2005	CALC; EMP; FTIR; ICPMS; MS; MS-ID	20.31	143.93	51.6054	1.14472	7.83753	6.58917	16.4864	11.6082	3.13151	0.421338	0.200637		1.82	94.4		20.3	33.4	195	0.1	75	4.02	2.45	1.19	14.7	4.03	2.09	0.83	9.02		0.35			4.93	12.7	76	1.16	2.82	7.09	31.9	3.33		306	0.307	0.64	1.164
WASTUNE-7-072-002	GL	BMRN10	GRIBBLE, 1998; IKEDA, 1998; MELSON, 2003; NEWMAN, 2000; PEARCE, 2005	CALC; EMP; FTIR; ICPMS; MS; MS-ID	19.83	144.3	51.57	1.27	7.34	6.55	16.92	10.57	3.09	0.48	0.18		2.23	87.9		19.1	33.4	205	0.12	53	4.73	2.92	1.28	15.4	4.4	2.59	0.98	7.75		0.43			6.69	12.6	131	1.19	2.7	8.34	32.2	3.54		262	0.424	0.74	1
WASTUNE-7-073-001-1	GL	BMRN10	GRIBBLE, 1998; PEARCE, 2005	MS-ID; ICP-MS	19.73	144.4	50.8643	1.40192	7.86452	7.56278	16.9785	10.3138	3.62215	0.35096	0.170466			49.6		15.6	38	249	0.06	56	4.66	2.85	1.25	16.1	4.15	2.51	0.98	6.19		0.43			5.38	11	179	0.91	2.36	4.71	33.9	3.24		268	0.345	0.73	0.566
WASTUNE-7-073-002-1	GL	BMRN10	GRIBBLE, 1998; MELSON, 2003; NEWMAN, 2000; PEARCE, 2005	CALC; EMP; FTIR; ICPMS; MS; MS-ID	19.73	144.4	51.3826	1.44224	7.87432	6.89623	16.9961	10.3622	3.69808	0.328352	0.179101		1.15	45		16.1	36.3	223	0.06	58	4.83	3.05	1.32	16.1	4.4	2.61	1.04	5.89		0.44			5.66	11.6	147	0.89	2.42	4.14	34.2	3.42		239	0.361	0.78	0.537
WASTUNE-7-074-001-1	GL	BMRN10	GRIBBLE, 1998; MELSON, 2003; NEWMAN, 2000; PEARCE, 2005	CALC; EMP; FTIR; ICPMS; MS; MS-ID	19.67	144.39	50.3854	1.15138	7.24208	7.92726	17.6018	11.5965	2.84563	0.297349	0.168498		1	40.6		14.5	38.4	367	0.05	74	4.24	2.62	1.13	15.9	4.03	2.15	0.87	6.05		0.36			4.95	10.3	177	0.7	2.11	4.3	34.2	3		265	0.325	0.65	0.581
WASTUNE-7-075-001-2	GL	BMRN10	GRIBBLE, 1998; IKEDA, 1998; NEWMAN, 2000; PEARCE, 2005	CALC; EMP; FTIR; ICPMS; MS; MS-ID	19.44	144.48											0.72	42.3		17.8	39.1	288	0.05	59	5.36	3.29	1.36	16.3	4.84	2.99	1.13	7.72		0.48			7.72	12.7	174	0.78	2.65	4.12	35.9	3.77		200	0.491	0.85	0.552
WASTUNE-7-076-001-1	GL	BMRN10	GRIBBLE, 1998; NEWMAN, 2000; PEARCE, 2005	CALC; EMP; FTIR; ICPMS; MS; MS-ID	19.45	144.54	52.79	1.62	9.48	7.23	15.88	10.37	3.48	0.23	0.18		0.73	27.3		15.1	39	211	0.03	61	5.98	3.74	1.48	16.8	5.27	3.03	1.31	5.31		0.54			4.5	12.4	118	0.75	2.45	2.34	32.9	3.97		184	0.294	0.96	0.354
WASTUNE-7-079-001-1	GL	BMRN10	GRIBBLE, 1998; PEARCE, 2005	MS-ID; ICP-MS	19.19	144.61	50.3955	1.08344	7.96376	7.88225	17.0953	11.3962	3.27994	0.170636	0.130486			30.9		11.9	44.1	318	0.09	57	4.47	2.8	1.2	16.7	3.93	2.12	0.96	4.32		0.41			2.99	9.55	196	0.61	1.77	2.63	31.3	3		224	0.184	0.71	0.423
WASTUNE-7-080-001-3	GL	BMRN10	GRIBBLE, 1998; IKEDA, 1998; MELSON, 2003; NEWMAN, 2000; PEARCE, 2005	CALC; EMP; FTIR; ICPMS; MS; MS-ID	19.12	144.67	48.839	0.855234	8.62971	8.82411	17.6869	11.3133	2.48156	0.346642	0.138657		0.57	28.3		8.62	44.7	232	0.14	89	4.28	2.85	0.994	13.7	3.33	1.39	0.83	3.49		0.38			1.25	7.03	196	0.49	1.24	12.3	34.9	2.38		188	0.097	0.58	0.227
WASTUNE-7-082-001-1	GL	BMRN9	GRIBBLE, 1998; MELSON, 2003; NEWMAN, 2000; PEARCE, 2005	CALC; EMP; FTIR; ICPMS; MS; MS-ID	18.75	144.66	51.6104	1.31749	8.10872	6.72236	16.6847	11.198	3.23437	0.242194	0.171554		1.69	40.6		14.7	34.2	209	0.06	65	5.22	3.23	1.36	15.9	4.6	2.33	1.01	5.3		0.43			2.69	11.7	139	0.78	2.16	4.26	36.3	3.61		214	0.19	0.74	0.412
FRAPCM1-003	GL	BMNS	Jenner, 2012	EMPA, SIMS, LA-ICPMS	-3.713	151.613	51.9646	0.38188	6.66738	9.18866	12.9942	14.367	1.58834	0.2461	0.08896	0.12774	0.932657	79.6897	0.233749	4.99286	45.0059	167.718	0.160683	87.4384	1.82749	1.16324	0.469391		1.50754	0.706511	0.39894	1.89281	4.64833	0.179506	1342.39	0.2919	0.33856	3.80242	70.7627	1.23684	0.756702	3.79734	41.8944	1.19058	0.333654	245.003	0.0164843	0.25007	0.166537
FRAPCM1-006	GL	BMNS	Jenner, 2012	EMPA, SIMS, LA-ICPMS	-3.7	151.767	76.0739	0.3529	2.88573	0.154667	11.8608	1.10723	4.58247	2.49373	0.0484333	0.0943333	0.928453	455.333	1.46743	30.6555	2.52653	0.57778	0.917706	17.2008	6.04443	4.01281	1.31344		5.26788	4.47568	1.30344	13.2212	15.5317	0.689068	821.909	1.79062	2.24488	18.916	0.210913	6.38301	4.21013	36.547	9.43845	4.87511	1.30507	220.673	0.138757	0.879817	1.65988
FRAPCM1-007A	GL	BMNS	Jenner, 2012	EMPA, SIMS, LA-ICPMS	-3.673	151.742	58.4357	1.17186	8.95202	3.22424	15.3161	7.15479	3.59017	0.843059	0.674352	0.18798	1.42891	163.102	0.615858	13.3008	26.639	0.830426	0.292888	279.233	2.99786	1.99512	1.00162		2.96398	1.42515	0.668121	5.65783	7.17145	0.289757	1359.64	0.781355	0.851148	9.48761	6.1711	2.46844	1.95623	11.4162	27.5842	2.55035	0.600027	567.125	0.0476921	0.466819	0.479628
FRAPCM1-007B	GL	BMNS	Jenner, 2012	EMPA, SIMS, LA-ICPMS	-3.673	151.742	59.8112	1.23364	9.18029	3.06508	14.926	6.78686	3.77421	0.917285	0.807175	0.214467		225.347	0.781833	18.1559	26.1255	0.712978	0.401691	281.985	4.29002	2.69852	1.28723		3.98788	1.89079	0.895392	7.70616	7.81892	0.400813	1355.58	0.635863	1.11213	13.2192	5.92445	3.06597	2.71312	14.8039	25.56	3.55551	0.639401	475.069	0.0729062	0.661616	0.626203
FRAPCM1-008	GL	BMNS	Jenner, 2012	EMPA, SIMS, LA-ICPMS	-3.7	151.706	60.8081	1.0626	7.46913	2.39018	15.6179	5.83752	4.16285	1.07688	0.631033	0.169		256.587	0.893635	20.6147	17.2058	16.0949	0.485638	28.3751	5.20796	3.30698	1.42159		4.76006	2.41023	1.13096	8.76967	9.86586	0.47851	1432.26	0.904149	1.26541	15.2651	8.65221	3.71304	3.02096	17.0144	23.774	4.24615	0.752315	425.856	0.0718987	0.787104	0.809319
FRAPCM2-028	GL	BMNS	Jenner, 2012	EMPA, SIMS, LA-ICPMS	-3.727	151.672	66.2753	0.6674	4.87947	1.40723	14.591	3.55938	4.51437	1.56723	0.2078	0.136633	1.19006	330.975	1.10906	23.7225	8.48144	27.9118	0.676852	18.6567	4.98046	3.31905	1.22372		4.50895	3.11643	1.05554	10.0091	14.0165	0.534869	1210.12	1.26271	1.7307	15.7268	17.1676	4.86469	3.27281	24.8007	16.4965	4.12475	1.05153	292.446	0.0927248	0.763491	1.16154
FRAPCM2-036	GL	BMNS	Jenner, 2012	EMPA, SIMS, LA-ICPMS	-3.713	151.712	69.3665	0.663285	5.06442	1.03718	14.35	3.40706	4.6799	1.5511	0.282861	0.145985	1.41329	386.356	1.27923	27.0045	7.56466	1.10114	0.771214	21.6752	5.78224	3.72866	1.40487		5.05815	3.46271	1.19437	11.6731	15.2232	0.590252	1225.21	1.45347	1.93088	17.6002	2.82036	5.53441	3.76256	30.4036	15.0069	4.65965	1.13447	339.415	0.109448	0.838125	1.31979
FRAPCM2-041	WR	BMNS5	KAMENETSKY, 2001	HR-ICP-MS	-3.7285	151.672	67.4	0.59	4.131	0.9	14.04	2.9	5.02	1.71	0.14	0.12		337		25.9			0.7	25	5.84	4.04	1.5		5.21	3.88	1.32	11.6		0.6			1.9	17.6	4	5.2	3.87	25	13	4.71		263		0.92	1.35
FRAPCM3-053	GL	BMNS	Jenner, 2012	EMPA, SIMS, LA-ICPMS	-3.71	151.688	60.4689	1.06492	7.287	2.43365	15.6911	5.8854	4.0797	1.06555	0.4298	0.168717	1.18336	217.93	0.773349	17.632	19.2543	1.74022	0.43341	36.5566	4.18934	2.67022	1.21996		3.91055	2.04994	0.887233	7.3183	8.77333	0.419675	1362.49	0.908693	1.1084	12.5135	2.01217	3.25788	2.53623	15.7076	24.7385	3.59328	0.668055	436.214	0.0678639	0.645861	0.668303
FRAPCM3-065	GL	BMNS	Jenner, 2012	EMPA, SIMS, LA-ICPMS	-3.728	151.688	67.3603	0.701717	4.7276	1.49677	14.7663	3.65058	4.58627	1.55627	0.20065	0.14645	1.19875	352.545	1.14187	23.9856	8.35013	31.8811	0.697168	18.4969	4.95374	3.30799	1.28986		4.36139	3.17854	1.12065	10.3688	13.2935	0.537173	1163.59	1.30257	1.82705	15.7747	19.0439	5.06238	3.37626	26.4529	16.4084	4.09919	1.02675	301.339	0.105639	0.738039	1.21349
FRAPCM4-101	GL	BMNS	Jenner, 2012	EMPA, SIMS, LA-ICPMS	-3.683	151.555	51.5404	0.453221	7.70536	6.85761	15.336	11.8103	1.89309	0.318602	0.179477	0.162785	1.0923	85.7609	0.269991	5.57389	40.7743	126.349	0.186372	102.344	2.04002	1.31641	0.508188		1.65621	0.77242	0.439114	2.24143	5.11723	0.202332	1333.69	0.302852	0.314208	4.24621	66.0505	1.37434	0.810798	5.4754	39.0135	1.30995	0.322035	239.725	0.0175283	0.282677	0.259033
FRAPCM4-114	GL	BMNS	Jenner, 2012	EMPA, SIMS, LA-ICPMS	-3.73	151.667	65.4942	0.759894	6.06186	1.12792	14.4471	3.58295	4.74793	1.34105	0.393866	0.14821	1.16905	342.734	1.17231	25.9568	8.90354	2.63155	0.688781	34.1121	5.57484	3.65859	1.4685		4.95694	3.50554	1.19561	11.0421	15.2584	0.581122	1301.82	1.28729	1.86219	17.3269	3.64297	4.9912	3.55193	25.5327	16.7651	4.68964	1.10581	328.885	0.107951	0.831362	1.23192
MOA8518-014-005	GL	BMNS	MACPHERSON, 2000; SHAW, 2012; SINTON, 2003	CALC; EMP; IMP; MS	-3.715	152.173	51.6	1.8	15	5.4	13.1	9.8	2.8	0.11	0.15	0.23	1.37	12.8	0.49	8.8		53			5.7	3.9	2.9		4.4	6.6		2.8	6.3				1.54	9.2		1.9			40.5	3.3		69			0.11
MOA8518-014-009	GL	BMNS	MACPHERSON, 1998; SHAW, 2004; SINTON, 2003	ICPMS; MANO; MS	-3.715	152.173											1.2	121.16	0.45	6.912	33.76	22.53	0.23	94.84	2.015	1.363	0.593	15.64	1.828	0.899	0.452	2.865	5.36	0.206			0.47	5.284	22.46	1.88	1.026	4.91	35.93	1.557		448	0.034	0.333	0.272
MOA8518-016-014	GL	BMNS5	MACPHERSON, 2000; SHAW, 2012; SINTON, 2003	CALC; EMP; ICPMS; IMP; MS	-3.70167	151.873	64	0.8	7.3	1.8	14.5	5.1	3.4	1.14	0.24	0.15	1.58	191.6	0.57	9.1	28.52	6	0.33	77.47	1.9	1.2	3.3	14.71	1.7	1.1	0.504	3.9	6.57	0.22			0.64	7.9	42.94	2.1	1.564	11.17	18.9	1.8		325	0.049	0.382	0.27
MOA8518-017-001	GL	BMNS	MACPHERSON, 2000; SHAW, 2012; SINTON, 2003	CALC; EMP; IMP; MS	-3.74	151.645	54.5	0.6	7.9	5.4	15.4	9.8	2.7	0.84	0.17	0.12	1.48	128.3	0.4	7.8		46			1.5	1.2	2.2		1.5	0.9		3.5	3.66				0.59	5.9		1.8			28.3	1.4		308			0.29
MOA8518-019-012	GL	BMNS4	MACPHERSON, 1998; MACPHERSON, 2000; SHAW, 2012; SINTON, 2003	CALC; ICPMS; IMP; MS; Unknown	-3.75167	151.158	53.6			4.8							1.58	32.89	0.36	5.823	38.85	76.18	0.1	105.39	3.761	2.636	0.793	15.71	2.964	1.482	0.879	2.088	7.85	0.398			0.69	5.443	52.63	0.806	0.956	3.33	36.7	2.011		105	0.055	0.589	0.155
MOA8518-021-002	GL	BMNS	MACPHERSON, 1998; MACPHERSON, 2000; SHAW, 2012; SINTON, 2003	CALC; EMP; IMP; MS	-3.84	150.502	53.7	1	10.6	5	14.8	9.5	2.7	0.24	0.1	0.16	1.36	27.9	0.26	4.9		34			2.6	2	1.6		1.9	1.4		1.7	4.93				0.6	3.7		1.5			32.1	1.5		76			0.11
MOA8518-023-002	GL	BMNS	MACPHERSON, 1998; MACPHERSON, 2000; SHAW, 2004; SHAW, 2012; SINTON, 2003	CALC; EMP; ICPMS; IMP; MS	-3.87	149.967	51.7	0.4	7.3	8.7	16	13.8	1.5	0.08	0.06	0.13	0.09	12.9	0.09	2.9	51.95	286	0.002	122.33	1.2	1	0.9	13.25	0.9	0.5	0.839	1.1	2.21	0.421			0.45	2	227.43	0.6	0.555	0.07	35.8	0.7		67	0.023	0.511	0.08
MOA8518-024-001	GL	BMNS1	SINTON, 2003	ICP-MS	-3.545	149.857												9.126	0.47	7.415	47.58	173.61	0.014	108.94	5.55	3.748	1.123	16.85	4.405	2.078	1.255	2.149	6.9	0.537			1.45	8.06	65.8	0.456	1.345	0.84	46.9	3.061		77.7	0.101	0.874	0.112
MOA8518-028-001	GL	BMNS	MACPHERSON, 1998; MACPHERSON, 2000; SHAW, 2004; SHAW, 2012; SINTON, 2003	CALC; EMP; ICPMS; IMP; MS	-3.66	149.673	50.9	0.66	8.3	7.8	16.3	12.6	2.1	0.21	0.06	0.17	0.88	27.5	0.19	3.7	45.09	260	0.035	103.92	2.3	1.4	1.3	15.33	1.5	0.8	1.018	1.4	2.63	0.447			0.28	4	101.64	1.7	1.103	1.64	36.4	1.5		171	0.076	0.702	0.07
MOA8518-031-001	GL	BMNS	MACPHERSON, 1998; SHAW, 2004; SHAW, 2012	EMP; IMP; MS	-3.50167	149.258	47.6	0.7	9.4	9.2	17.2	12.9	2.1	0.03	0.03	0.16	0.67	1.2	0.14	2.5		308			2.6	2.1	2.5		2.3	1		0.6	2.37				0.18	3.2		1.1			46.9	1.6		55			0.03
MOA8518-031-008	GL	BMNS	MACPHERSON, 1998; MACPHERSON, 2000; SHAW, 2012	EMP; IMP; MS	-3.50167	149.258	50.9	1.1	10.7	6.9	14.7	11.7	2.3	0.15	0.09	0.18	1.14	16	0.27	5.1		239			3.2	2.4	1.8		2.5	1.4		1.6	3.57				0.92	5.1		1.3			39.8	1.7		80			0.11
MOA8518-032-005	GL	BMNS	MACPHERSON, 1998; MACPHERSON, 2000; SHAW, 2004; SHAW, 2012; SINTON, 2003	CALC; EMP; ICPMS; IMP; MS	-3.42	149.015	50.2	1.5	11.7	6.7	14.3	11.6	2.7	0.13	0.13	0.2	0.22	18.1	0.49	9.6	48.15	106	0.007	104.11	4.3	2.9	2.6	14.86	3.7	2.2	0.916	3.2	3.96	0.387			3.24	8.5	101.53	1.6	0.949	0.51	42.1	2.6		91	0.062	0.64	0.14
MOA8518-033-001	GL	BMNS	MACPHERSON, 1998; MACPHERSON, 2000; SHAW, 2012	EMP; IMP; MS	-3.528	149.015	49.6	1	10.4	7.8	14.8	12.5	2.2	0.06	0.08	0.18	0.56	4.5	0.24	4.3		223			3.3	2.1	1.2		2.3	1		1.3	3.37				0.66	5.2		0.5			40.6	3.6		60			0.03
MOA8518-033-003	GL	BMNS	MACPHERSON, 1998; MACPHERSON, 2000; SHAW, 2004; SHAW, 2012; SINTON, 2003	CALC; EMP; IMP; MS	-3.528	149.015	50.5	0.9	10.5	7.2	14.5	12.3	2.2	0.09	0.06	0.18	0.21	11.4	0.22	4.4		194			2.6	1.9	1.6		2	1		1.4	3.28				0.59	4.9		1.3			40.6	1.5		81			0.08
MOA8518-034-001	GL	BMNS	MACPHERSON, 1998; MACPHERSON, 2000; SHAW, 2004; SHAW, 2012; SINTON, 2003	CALC; EMP; IMP; MS	-3.6067	149.732	50.6	1	10.3	7.5	14.2	12.4	2.3	0.05	0.07	0.221	0.59	3.2	0.24	4		122			3.5	2.3	1.8		2.4	1.4		1.1	3.37				0.59	5		2.2			43.8	2		57			0.07
MOA8518-036-002	GL	BMNS	MACPHERSON, 1998; MACPHERSON, 2000; SHAW, 2004; SHAW, 2012	EMP; IMP; MS	-3.4467	149.963	51.1	0.9	10.4	7.3	14.7	12.4	2.3	0.08	0.06	0.18	0.3	11.1	0.21	4.1		196			2.6	1.9	1.6		2	1.1		1.4	3.2				0.5	4.6		1.6			40.3	1.6		83			0.06
MOA8518-036-004	GL	BMNS1	SINTON, 2003	ICP-MS	-3.44667	149.963												191.8	0.83	31.79	27.97	79.52	0.365	71.41	2.839	1.827	0.863	16.02	2.672	2.162	0.62	16.526	9.65	0.272			4.93	13.885	48.43	3.506	3.572	8.78	27.01	2.739		456	0.277	0.472	3.107
MOA8518-038-003	GL	BMNS	MACPHERSON, 1998; MACPHERSON, 2000; SHAW, 2004; SHAW, 2012	EMP; IMP; MS	-3.332	150.081	50.4	0.9	10	8.2	14.8	12.6	2.2	0.06	0.05	0.17	0.41	6	0.22	4.2		307			2.7	2.1	1.7		2.2	1.2		1.2	2.87				0.92	4.6		0.8			40.3	2		57			0.48
MOA8518-039-001	GL	BMNS1	MACPHERSON, 1998; MACPHERSON, 2000; SHAW, 2004; SHAW, 2012; SINTON, 2003	EMP; ICPMS; IMP; MS	-3.29	150.128	51	1.4	10.9	6.6	13.6	10.9	2.5	0.07	0.09	0.24	0.32	7.6	0.31	5.9	48.01	107	0.018	109.13	4.2	4.1	2.1	16.8	3.3	1.8	1.318	1.7	4.37	0.573			1.05	6.6	54.06	1.5	1.356	0.9	43.1	2.5		61	0.09	0.896	0.08
MOA8518-040-006	GL	BMNS	MACPHERSON, 1998; SHAW, 2004; SHAW, 2012	EMP; IMP; MS	-3.24833	150.128	50.9	1.2	12.1	7	13.8	11.5	2.4	0.06	0.08	0.2	1.18	5.9	0.28	4.9		97			3.4	2.4	1.8		4.3	1.7		1.3	4.15				0.77	5.6		1			41.4	2		58			0.07
MOA8518-041-001	GL	BMNS	MACPHERSON, 2000; SHAW, 2004; SHAW, 2012; SINTON, 2003	CALC; EMP; IMP; MANO; MS	-3.2	150.208	51.9	1.1	10.7	6	15	11	2.7	0.21	0.1	0.19	1.42	26	0.31	6.2		67			3.6	2	1.9		2.5	1.4		2.2	3.77				0.79	5.8		1.3			36.7	1.8		129			0.12
MOA8518-041-003	GL	BMNS	MACPHERSON, 1998; MACPHERSON, 2000; SHAW, 2012	EMP; IMP; MS	-3.2	150.208	68.4	0.8	9.5	0.6	11.4	4.5	2.8	0.33	0.21	0.17	1.33	36.7	0.99	18.1		4			9.8	7	4.8		7.7	5.8		5.7	14.77				3.03	21.1		1.8			17.1	6.3		57			0.27
MOA8518-042-001	GL	BMNS	MACPHERSON, 1998; MACPHERSON, 2000; SHAW, 2004; SHAW, 2012; SINTON, 2003	CALC; EMP; IMP; MS	-3.16	150.285	52.4	0.9	9.7	6.4	15.1	11.2	2.5	0.13	0.09	0.16	0.7	14.4	0.24	4.7		113			2.5	1.4	1.3		2	1.2		1.6	3.06				0.63	4.6		0.7			35.7	1.3		120			0.07
MOA8518-043-001	GL	BMNS	MACPHERSON, 1998; MACPHERSON, 2000; SHAW, 2012	EMP; IMP; MS	-3.148	150.322	50.9	1.3	12.5	6.1	13.8	10.6	2.6	0.1	0.07	0.22	0.9	12.2	0.32	6.5		53			4	2.6	2.4		2.8	1.6		2.1	4.23				0.99	6.1		1.1			41.3	2.5		76			0.07
MOA8518-044-001	GL	BMNS	MACPHERSON, 1998; MACPHERSON, 2000; SHAW, 2004; SHAW, 2012	EMP; IMP; MS	-3.0867	150.395	52.5	1.7	14.7	4.6	12	9.1	3	0.14	0.16	0.22	0.43	17	0.48	9.5		22			6.2	3.9	2.9		4.5	2.5		2.9	6.28				1.65	9.4		1.5			39.6	3.3		70			0.1
MOA8518-045-001	GL	BMNS	MACPHERSON, 1998; MACPHERSON, 2000; SHAW, 2012	EMP; IMP; MS	-3.065	150.455	50.8	1.2	12.1	6.8	13.8	11.3	2.4	0.06	0.08	0.22	0.39	6.8	0.27	4.8		84			3.7	2.9	2.2		2.5	1.4		1.4	3.96				0.87	5.9		1.1			41.9	2.3		60			0.06
MOA8518-047-001	GL	BMNS	MACPHERSON, 1998; MACPHERSON, 2000; SHAW, 2012; SINTON, 2003	CALC; EMP; IMP; MS	-3.07667	150.563	51.6	1.4	13.1	6.4	13.9	11.2	2.5	0.07	0.11	0.2	0.64	7.8	0.32	5.9		51			4.2	3	2.2		2.9	1.5		1.7	4.56				1	6.5		1.1			42	2.4		60			0.09
SON0094-086	GL	BMNS	Jenner, 2012	EMPA, SIMS, LA-ICPMS	-3.612	151.788	55.4676	0.831289	11.0873	4.23551	14.9254	8.09234	3.10546	0.678167	0.345983	0.183578	1.46695	174.936	0.641111	13.4185	36.1445	15.5599	0.337607	183.959	3.3466	2.23766	1.01906		3.10322	1.62749	0.742059	5.72945	7.36914	0.330493	1462.57	0.606655	0.812498	9.63186	23.7082	2.50065	1.94236	12.435	35.2422	2.75895	0.559467	436.195	0.0463041	0.524731	0.493945
SON0094-087	GL	BMNS	Jenner, 2012	EMPA, SIMS, LA-ICPMS	-3.61	151.788	72.9336	0.428735	3.50258	0.261249	12.842	1.78705	4.73459	1.69425	0.149101	0.112496	0.875865	425.792	1.22111	28.1345	2.50928	0.533934	0.878256	17.1241	5.74446	3.88394	1.21024		5.07939	4.17117	1.27001	12.1836	15.4122	0.653763	978.147	1.576	2.31401	17.5669	0.289679	5.44185	3.88491	32.844	10.8463	4.74013	1.08109	215.032	0.131608	0.857686	1.50319
SON0094-100	GL	BMNS5	SUN, 2007;SUN, 2003	LA-ICP-MS; FTIR	-3.7	151.85	54.18	0.54	7.46	5.6	15.82	9.5	2.75	0.66	0.15	0.14	1.3	172						84.1													0.69			2.8							0.04		0.44
POLAN15-2-097-005	GL	BSCO2	FRETZDORFF, 2002	EMP; FTIR; ICPMS	-56.78	-30.73	52.0365	1.7104	8.11938	7.06295	16.0275	10.4133	3.39062	0.211285	0.34208	0.17104	0.48	100		16	33.7	179	0.131	42.1	6.26	3.98	1.44	16.8	5.4	3.32	1.33	5.86		0.532			5.06	13.2	80.8	0.865	2.59	7.51	38.8	4.26		179	0.325	0.948	0.54
POLAN15-2-097-001	GL	BSCO2	FRETZDORFF, 2002; FRETZDORFF, 2003	ICP-MS	-56.78	-30.73	51.8707	1.72064	8.28119	6.98317	16.0492	10.4446	3.41109	0.211306	0.352177	0.160995		38.3		15.4	35	213	0.048	45.1	6.48	3.81	1.48	16.7	5.51	3.61	1.34	5.15		0.536			3.93	13	95.5	0.682	2.57	5.5	33.5	4.35		148	0.237	0.966	0.323
POLAN15-2-096-001	GL	BSCO2	FRETZDORFF, 2002; FRETZDORFF, 2003	EMP; FTIR; ICPMS; MS	-56.54	-30.73	50.8032	1.24329	7.90452	8.24819	16.5166	11.3312	3.0021	0.131405	0.26281	0.161729	0.24	20.2		9.26	36.3	302	0.016	52.7	4.53	2.59	1.05	14.5	3.71	2.27	0.925	3.12		0.371			2.45	8.17	130	0.448	1.59	2.34	30.5	2.82		129	0.152	0.665	0.178
POLAN15-2-096-003	GL	BSCO2	FRETZDORFF, 2002	EMP; FTIR; ICPMS	-56.54	-30.73	50.64	1.54	8.62	7.39	15.64	10.87	3.11	0.16	0.29	0.16	0.43	30.9		11.9	35.8	247	0.033	48.5	5.71	3.31	1.25	16	4.72	2.9	1.18	4.04		0.469			3.44	10.5	96.9	0.492	2.04	3.63	33.2	3.56		130	0.207	0.85	0.259
JCR0012-R015	WR	BSCO2	LEAT, 2000	ICP-MS	-56.4992	-30.7253												50.7		15.86	34.2	260	0.08	52	6.64	4.04	1.49	17	5.21	3.41	1.41	5.21		0.61			4.5	13.18	91	0.91	2.61	6.34	36.6	4.41		147	0.29	0.99	0.39
JCR039B-R046	GL	BSCO2	FRETZDORFF, 2002	ICP-MS	-56.85	-30.72	50.92	1.69	8.73	6.63	15.46	10.48	3.2	0.39	0.34	0.19		102		13.1	31.5	191	0.136	43.1	4.9	2.83	1.16	15.5	4.18	2.63	1.01	4.97		0.408			3.91	10.1	78.9	0.82	2.08	10.2	29.3	3.25		177	0.252	0.721	0.506
JCR039B-R045	GL	BSCO2	FRETZDORFF, 2002	EMP; FTIR; ICPMS; MS	-56.67	-30.72	49.65	1.32	8.31	8.25	15.33	11.8	3.09	0.11	0.26	0.17	0.12	12.3		7.4	36.3	324	0.014	59.4	4.62	2.93	1.07	14.7	3.89	2.17	0.986	2.35		0.385			1.58	7.89	124	0.376	1.4	1.02	35.7	2.86		104	0.105	0.693	0.111
JCR0012-R014	WR	BSCO2	LEAT, 2000	ICP-MS	-56.459	-30.7128												21.6		7.73	41.5	585	0.02	63	4.39	2.71	0.98	14.7	3.32	1.91	0.94	2.43		0.4			2.25	7.15	204	0.65	1.36	1.71	31.9	2.7		106	0.14	0.65	0.18
POLAN15-2-098-001	GL	BSCO	FRETZDORFF, 2002; FRETZDORFF, 2003	EMP; FTIR; ICPMS; MS	-56.93	-30.7	52.15	1.4	7.57	6.83	16.04	10.82	2.81	0.42	0.3	0.17	1.63	143		15.5	29.6	169	0.222	53.9	5.18	3.14	1.29	16.5	4.55	2.92	1.11	5.98		0.45			4.43	12	80.2	1.12	2.42	11.7	34.2	3.7		237	0.288	0.804	0.499
SHA1974-020-013	GL	BSCO	AREVALO JR, 2008; MELSON, 2003; MUENOW, 1980	EMP; LA-ICPMS; MS; XRF	-56.393	-30.658	51.7	1.37	8.14	6.99	16.23	11.14	3.11	0.25	0.2	0.15	0.922	38.4		12.15					4.27	2.57	1.13		3.7		0.87	4.93		0.35				10.31			1.93			3.18				0.63	0.398
SHA1974-020-031	GL	BSCO	AREVALO JR, 2008; MELSON, 2003; MUENOW, 1980	EMP; LA-ICPMS; MS; XRF	-56.393	-30.658	52.16	1.42	8.12	7.04	16.19	11.21	3.07	0.26	0.17	0.15	0.95	40		12.63					5.07	3.08	1.21		4.42		1.06	5.4		0.42				11.28			2.06			3.52				0.74	0.431
SHA1974-020-035	GL	BSCO	AREVALO JR, 2008; MATTEY, 1984; MELSON, 2003; MUENOW, 1980	EMP; LA-ICPMS; MS; XRF	-56.393	-30.658	51.69	1.34	7.99	7.09	16.36	11.24	3.09	0.23	0.16	0.15	0.717	41		13.02					5.25	3.21	1.35		4.58		1.09	5.57		0.43				12.27			2.22			3.8				0.75	0.376
SHA1974-020-043	GL	BSCO	AREVALO JR, 2008; MELSON, 2003; MUENOW, 1980	EMP; LA-ICPMS; MS	-56.393	-30.658	51.58	1.37	8.22	7.08	16.39	11.29	3.1	0.25	0.18		0.733	43		13.55					5.46	3.24	1.37		4.61		1.1	5.87		0.44				12.64			2.28			3.96				0.78	0.404
JCR039B-R050	GL	BSCO	FRETZDORFF, 2002	EMP; FTIR; ICPMS; MS	-57.71	-30.4	50.35	1.52	9.1	7.72	15.17	11.27	3.16	0.13	0.29	0.2	0.29	15.4		11	38.2	292	0.023	58.4	5.51	3.35	1.21	16.3	4.52	2.78	1.19	3.61		0.482			2.43	10	116	0.526	1.93	1.06	36.9	3.46		141	0.17	0.826	0.147
POLAN15-2-100-001	GL	BSCO	FRETZDORFF, 2002; FRETZDORFF, 2003	EMP; FTIR; ICPMS; MS	-57.2	-30.36	51.55	1.46	7.94	7.42	15.63	10.68	3.06	0.19	0.26	0.16	0.69	31.1		12	32.4	163	0.072	49.7	5.22	3.07	1.22	16.9	4.35	2.79	1.07	4.12		0.445			2.51	10.1	75.1	0.886	1.98	4.17	29	3.4		139	0.164	0.779	0.263
JCR0012-R011	WR	BSCO1	LEAT, 2000	ICP-MS	-56.4223	-30.3582												101		14.55	32.5	270	0.15	62	4.2	2.51	1.07	15.1	3.51	2.26	0.86	5.78		0.38			5.64	10.23	96	1.43	2.14	11.9	32	3.01		216	0.35	0.65	0.58
JCR0012-R012	WR	BSCO1	LEAT, 2000	ICP-MS	-56.4393	-30.358												89.3		15.75	29.8	223	0.13	53	4.77	2.85	1.2	16.1	3.98	2.52	1	6.05		0.43			6.31	11.03	65	0.98	2.33	13.38	33.8	3.39		195	0.39	0.72	0.62
JCR039B-R044	GL	BSCO1	FRETZDORFF, 2002	ICP-MS	-56.1155	-30.3502	52.7	1.69	8.94	4.77	15.14	9.04	3.75	0.49	0.36	0.2		107		20.7	28.3	70.4	0.105	46.9	5.11	3.05	1.36	17.4	4.59	3.01	1.09	9.08		0.439			8.53	13.9	37	1.17	3.04	6.83	31.5	3.92		234	0.484	0.798	0.977
JCR0012-R019	WR	BSCO1	LEAT, 2000	ICP-MS	-56.4	-30.3498												101.1		16.52	31.4	251	0.14	58	4.67	2.82	1.19	16.2	3.92	2.6	0.98	6.45		0.42			6.67	11.32	77	1.02	2.41	12.11	33.7	3.41		204	0.42	0.7	0.66
JCR0012-R010	WR	BSCO1	LEAT, 2000	ICP-MS	-56.3635	-30.3398												79.5		13.2			0.11		4.02	2.4	1.02	15.5	3.28	2.04	0.84	5.07		0.36			5.32	9.09		1.26	1.94	6.89	34.7	2.78		185	0.32	0.6	0.54
JCR0012-R020	WR	BSCO1	LEAT, 2000	ICP-MS	-56.3412	-30.3342												51.2		15.62	35.9	245	0.06	57	5.39	3.23	1.29	16.3	4.37	2.76	1.14	5.89		0.49			6.05	11.42	90	0.77	2.4	3.92	35.2	3.67		149	0.36	0.81	0.53
JCR0012-R009	WR	BSCO1	LEAT, 2000	ICP-MS	-56.3185	-30.3283												76.2		15.89	31.6	238	0.1	57	4.92	2.9	1.23	15.7	4.07	2.54	1.03	5.97		0.44			5.97	11.39	84	0.9	2.38	5.8	33.1	3.49		184	0.38	0.74	0.58
JCR0012-158-002	WR	BSCO1	HARRISON, 2003	ICP-MS	-56.1005	-30.3252												194		34.62	38	260	0.17	59	4.17	2.3	1.39	16.4	4.44	3.01	0.84	16.27		0.33			24.74	18.23	89	1.91	4.36	16.4	34.7	4.17		296	1.52	0.69	1.86
JCR0012-157-007	WR	BSCO1	HARRISON, 2003	ICP-MS	-56.1005	-30.3252	53.54	1.51	8.57	4.54	16.75	8.38	3.61	0.8	0.51	0.2		216		26.28	24.3	24	0.27	54	6.15	3.58	1.69	18.5	6.06	3.21	1.29	10.75		0.54			9.42	17.96	25	1.4	3.82	16.8	27.3	5.33		273	0.59	1	1.28
JCR0012-157-004	WR	BSCO1	HARRISON, 2003	ICP-MS	-56.1005	-30.3252	48.24	1.81	8.88	6.58	15.34	11.46	2.91	0.75	0.41	0.19		193		33.71	39.5	308	0.17	59	4.17	2.3	1.43	16.9	4.45	3.04	0.84	15.98		0.33			24.96	17.99	92	1.47	4.39	16.3	34.6	4.37		290	1.53	0.71	1.8
JCR0012-157-009A	WR	BSCO1	HARRISON, 2003	ICP-MS	-56.1005	-30.3252	49	1.83	9.04	6.55	15.42	11.46	2.94	0.71	0.42	0.18		189		33.09	40.5	311	0.16	59	4.15	2.28	1.4	16.6	4.42	3.07	0.84	15.69		0.32			25.12	17.56	96	1.05	4.3	16.1	35	4.34		291	1.5	0.69	1.78
JCR0012-157-009B	WR	BSCO1	HARRISON, 2003	ICP-MS	-56.1005	-30.3252	49.869	1.79672	9.1034	6.53808	15.5916	11.529	2.89472	0.738653	0.439199	0.189654		191		33.4	39.9	321	0.17	57	4.18	2.29	1.41	16.1	4.36	3	0.83	15.83		0.33			24.38	17.6	153	1.06	4.31	15.9	33.5	4.36		281	1.52	0.71	1.77
JCR0012-157-001	WR	BSCO1	HARRISON, 2003	ICP-MS	-56.1005	-30.3252	49.4791	1.61366	9.47409	7.38524	15.1665	11.7708	2.80164	0.673185	0.257394	0.158396		196		34.74	37.6	259	0.16	67	4.21	2.31	1.38	16.3	4.43	2.96	0.83	16.15		0.34			24.73	18.07	92	3.07	4.33	15.9	35.1	4.14		296	1.52	0.68	1.87
JCR0012-157-003	WR	BSCO1	LEAT, 2000	ICP-MS	-56.1005	-30.3252	52.36	1.19	8.44	5.59	16.26	10.07	3.21	0.69	0.24	0.15		228		20.69	27	79	0.29	61	4.55	2.68	1.27	16.3	4.12	2.38	0.94	8.36		0.41			6.94	13.51	43	1.92	2.9	15.4	32.5	3.73		281	0.43	0.73	1.15
JCR039B-R042	GL	BSCO1	FRETZDORFF, 2002	EMP; FTIR; ICPMS	-56.034	-30.3252	53.4	1.61	8.93	4.98	15.15	9.07	3.66	0.52	0.37	0.2	0.77	114		20.7	26.3	54.3	0.131	49.6	5.12	3.06	1.34	17.4	4.54	2.99	1.08	9.02		0.444			7.79	13.8	32.1	1.49	2.99	7.97	29.8	3.89		244	0.435	0.796	0.989
JCR0012-R027	WR	BSCO1	LEAT, 2000	ICP-MS	-56.0668	-30.323												116.9		24.26	29.2	50	0.12	47	5.67	3.39	1.45	17.8	4.9	3.2	1.19	10.16		0.51			10.51	15.27	32		3.38	7.94	30.1	4.28		221	0.6	0.85	1.13
JCR0012-R028	WR	BSCO1	LEAT, 2000	ICP-MS	-56.0827	-30.3228												117.9		24.4	28	51	0.13	49	5.57	3.35	1.43	17.8	4.81	3.19	1.17	10.26		0.51			10.4	15.14	34	2.93	3.39	8.71	29.3	4.21		228	0.6	0.85	1.18
JCR0012-R023	WR	BSCO1	LEAT, 2000	ICP-MS	-56.2952	-30.3222												54		14.22	32.3	255	0.06	54	4.86	2.89	1.17	15.7	3.92	2.5	1.03	5.33		0.43			5.74	10.47	85	0.86	2.15	4.44	32.9	3.35		153	0.34	0.72	0.5
JCR0012-R029	WR	BSCO1	LEAT, 2000	ICP-MS	-56.0487	-30.3222												207.4		19.14	28	55	0.32	64	4.5	2.67	1.23	17	4	2.45	0.95	7.77		0.41			7.5	12.33	41	1.84	2.68	17.28	31.2	3.56		258	0.48	0.69	1.07
JCR0012-R030	WR	BSCO1	LEAT, 2000	ICP-MS	-56.0123	-30.321												155.6		22.2	27.7	13	0.26	34	5.31	3.15	1.4	17.6	4.68	3.02	1.11	8.95		0.49			8.64	14.37	15	1.61	3.14	15.02	27	4.1		241	0.53	0.81	1.1
JCR0012-R031	WR	BSCO1	LEAT, 2000	ICP-MS	-55.9943	-30.3203												230		26.83	27.8	30	0.43	61	5.45	3.16	1.51	17.7	5.17	2.93	1.13	10.88		0.48			7.95	17.1	28	2.26	3.64	17.9	29.8	4.54		307	0.5	0.85	1.63
JCR0012-R032	WR	BSCO1	LEAT, 2000	ICP-MS	-55.9767	-30.3203												201.4		37.25	16.8	22	0.26	24	8.55	5.11	2.06	19.8	7.69	4.91	1.8	15.07		0.77			15.51	23.82	13	1.87	5.25	16.41	19.6	6.8		184	0.91	1.32	1.73
JCR0012-R034	WR	BSCO1	LEAT, 2000	ICP-MS	-55.9408	-30.3192												172.9		28.21	26.3	12	0.22	38	6.46	3.895	1.66	19.3	5.65	3.81	1.37	11.71		0.59			12.97	17.57	11	1.75	3.94	13.81	26.7	4.98		214	0.76	0.99	1.38
JCR0012-R035	WR	BSCO1	LEAT, 2000	ICP-MS	-55.9048	-30.319												50.9		11.92	34.5	176	0.06	58	4.26	2.565	1.02	15.6	3.42	2.11	0.9	4.47		0.39			4.48	8.8	83	0.73	1.83	4.31	33	2.85		150	0.27	0.63	0.47
JCR0012-R036	WR	BSCO1	LEAT, 2000	ICP-MS	-55.887	-30.3188												147.8		22.95	29.6	30	0.23	41	5.97	3.58	1.51	18.1	5.12	3.31	1.27	9.12		0.54			9.5	15.06	28	1.43	3.29	13.22	31	4.48		220	0.58	0.91	1.09
JCR0012-R037	WR	BSCO1	LEAT, 2000	ICP-MS	-55.8642	-30.3182												57		14.81	36.4	162	0.06	57	4.91	2.92	1.24	16.5	4.03	2.57	1.03	5.65		0.43			6.78	10.87	75	0.91	2.24	4.85	34.6	3.44		179	0.42	0.73	0.52
JCR0012-R003	WR	BSCO1	LEAT, 2000	ICP-MS	-56.1002	-30.3177												133.4			20.2	10	0.24	46				19.4		4.66							9.45		23	1.6		9.38	28.6			230	0.55		1.12
JCR0012-R021	WR	BSCO1	LEAT, 2000	ICP-MS	-56.2728	-30.3163												104.8		18.4		367	0.09	68	3.87	2.26	1.04	14.7	3.38	1.98	0.81	8.41		0.35			8.95	10.59	121	1	2.43	5.47	34.3	2.91		206	0.47	0.59	1.47
JCR0012-R004	WR	BSCO1	LEAT, 2000	ICP-MS	-56.118	-30.3127												123		26.98		74	0.13	41	6.5	3.85	1.65	18.7	5.52	3.63	1.37	11.12		0.59			11.31	17.11	50	2.52	3.82	8.77	28.3	4.97		207	0.66	0.98	1.2
JCR0012-R025	WR	BSCO1	LEAT, 2000	ICP-MS	-56.2518	-30.311												62		13.53		353	0.07	62	4.12	2.44	1.07	15.3	3.5	2.19	0.86	5.12		0.37			5.5	9.6	114	0.8	2.03	4.59	31.6	2.96		185	0.35	0.63	0.48
JCR0012-R007	WR	BSCO1	LEAT, 2000	ICP-MS	-56.1898	-30.3102												111.2		12.78		188	0.16	77	2.97	1.74	0.85	13.9	2.59	1.56	0.62	5.06		0.26			4.26	8.069	74	1.6	1.78	6.87	33.8	2.35		216	0.26	0.46	0.76
JCR0012-R024	WR	BSCO1	LEAT, 2000	ICP-MS	-56.22	-30.31												67.5		13.86		281	0.08	53	4.12	2.44	1.06	14.9	3.51	2.22	0.87	5.27		0.37			5.62	9.77	109	0.85	2.06	5.24	30.7	2.96		185	0.35	0.62	0.52
JCR0012-R022	WR	BSCO1	LEAT, 2000	ICP-MS	-56.2132	-30.3097												120.5		18.28		108	0.15	54	4.73	2.81	1.255	16.6	4.09	2.48	0.99	7.3		0.43			7.72	12.04	48	1.3	2.62	8.75	31.6	3.54		216	0.47	0.72	0.85
JCR0012-158-024B	WR	BSCO1	HARRISON, 2003	ICP-MS	-56.1567	-30.3085	54.6002	1.91281	9.59409	3.58527	16.2739	7.33077	3.96583	0.731074	0.490721	0.220324		176		27.44	25.4	5	0.26	36	6.47	3.87	1.73	19.2	6.19	3.71	1.37	11.44		0.58			12.1	18.16	5	1.88	3.95	14.6	24.3	5.38		231	0.72	1.05	1.33
JCR0012-158-023	WR	BSCO1	LEAT, 2000	ICP-MS	-56.1567	-30.3085	55.361	1.82333	10.1285	3.48636	15.4081	7.01279	4.22771	0.741352	0.330603	0.170311		197		28.42	24.8		0.27	35	6.51	3.87	1.7	19.3	5.83	3.63	1.36	11.75		0.59			11.84	18.51	6	1.88	3.93	15	25.7	5.13		240	0.7	1.02	1.37
JCR0012-158-006	WR	BSCO1	LEAT, 2000	ICP-MS	-56.1567	-30.3085	52.2404	1.01283	8.27147	5.63016	16.7217	10.3071	2.61152	1.04262	0.238314	0.148946		283		23.21	27.9	73	0.71	77	4.06	2.33	1.24	16.2	4.09	2.01	0.83	9.27		0.36			4.17	13.58	33	2.57	3	24.3	35.2	3.69		394	0.27	0.66	1.9
JCR0012-158-004	WR	BSCO1	LEAT, 2000	ICP-MS	-56.1567	-30.3085	53.1527	1.00139	7.93177	5.54232	16.5675	10.0436	2.57782	1.04104	0.228038	0.138806		283		23.28	27.4	72	0.74	75	4.09	2.35	1.25	15.9	4.07	2.03	0.83	9.41		0.36			4.2	13.72	33	2.64	3.03	24.3	35.4	3.71		378	0.27	0.66	1.89
JCR0012-158-005	WR	BSCO1	LEAT, 2000	ICP-MS	-56.1567	-30.3085	52.4177	1.0086	8.0095	5.7352	16.8496	10.1849	2.64017	1.02838	0.22743	0.138436		282		22.75	26.9	72	0.72	68	3.95	2.28	1.23	15.8	4.03	1.97	0.81	9.19		0.35			4.12	13.52	33	4.2	2.97	23.8	34.9	3.68		376	0.27	0.66	1.89
JCR0012-R006	WR	BSCO1	LEAT, 2000	ICP-MS	-56.1663	-30.3083												128.4		28.23		14	0.14	42	6.63	3.97	1.68	19.1	5.73	3.84	1.39	11.7		0.61			11.94	17.77	13	1.67	3.95	9.45	27.9	5.01		213	0.71	1.01	1.29
JCR0012-R005	WR	BSCO1	LEAT, 2000	ICP-MS	-56.136	-30.307												199.4		23.7		46	0.26	38	5.87	3.51	1.53	17.8	5.08	3.22	1.23	9.46		0.55			8.46	15.61	31	1.93	3.41	14.29	28.1	4.51		238	0.53	0.88	1.14
JCR0012-R001	WR	BSCO1	LEAT, 2000	ICP-MS	-56.0878	-30.2988												178.5		22.42			0.25		4.79	2.9	1.28	18	4.29	2.57	1.01	9.23		0.44			8.23	13.52		5.26	3.06	14.33	39.1	3.7		287	0.45	0.74	1.02
JCR0012-R002	WR	BSCO1	LEAT, 2000	ICP-MS	-56.0867	-30.2867												161.4		19.82			0.2		4.77	2.85	1.27	17.5	4.18	2.42	1	8.04		0.45			6.43	12.73		1.87	2.8	12.25	35.8	3.61		312	0.39	0.72	0.92
JCR039B-R043	GL	BSCO1	FRETZDORFF, 2002	EMP; FTIR; ICPMS	-56.1138	-30.2777	53.08	1.99	9.95	4.21	15.12	7.97	4.02	0.47	0.42	0.2	1.02	117		24.3	28.1	10.8	0.127	36.3	6.13	3.69	1.59	18.7	5.58	3.66	1.3	10.3		0.531			9.72	16.3	8.99	1.29	3.55	7.45	30.9	4.63		211	0.553	0.958	1.05
JCR039B-R065	GL	BSCO	FRETZDORFF, 2002	EMP; FTIR; ICPMS; MS	-59.92	-30.2	51.75	0.9	7.48	7.06	16.4	12.03	2.68	0.21	0.26	0.17	0.92	31.8		6.7	31.8	224	0.06	64.5	2.67	1.68	0.715	12.8	2.31	1.33	0.567	2.52		0.227			2.04	5.54	84.7	0.568	1.09	2.78	33.8	1.78		155	0.127	0.404	0.193
POLAN15-2-102-001B	GL	BSCO4	FRETZDORFF, 2002	ICP-MS	-57.26	-30.17	52.55	1.49	8.26	6.1	15.62	9.81	3.24	0.21	0.26	0.17		8.7		9.3	38.4	328	0.013	64.7	4.79	2.85	1.18	15.8	4.05	2.53	1.02	2.94		0.401			2.06	8.97	99	0.469	1.69	0.697	33.6	3.12		145	0.15	0.729	0.109
JCR039B-R048	GL	BSCO4	FRETZDORFF, 2002	EMP; FTIR; ICPMS; MS	-57.42	-30.14	49.83	1.33	8.26	8.13	15.3	11.6	3.29	0.1	0.26	0.18	0.18	19		14.3	34.2	207	0.026	48.8	6.23	3.6	1.41	16.2	5.22	3.55	1.3	4.9		0.52			2.91	12.4	82.5		2.45	2.5	31.9	4.07		143	0.194	0.929	0.228
JCR039B-048	GL	BSCO4	FRETZDORFF, 2003	ICP-MS	-57.42	-30.14																																											0.103
JCR039B-R041	GL	BSCO4	FRETZDORFF, 2002	ICP-MS	-57.49	-30.13	51.4509	1.61036	8.80665	6.60247	16.4156	10.0949	3.77428	0.201295	0.342201	0.201295		25.1		14.2	33.4	205	0.057	50.5	6.11	3.69	1.44	17.2	5.22	3.3	1.31	4.83		0.53			3.2	12.3	89.1	0.828	2.43	2.46	33.7	4.02		155	0.216	0.934	0.265
POLAN15-2-104-003	GL	BSCO4	FRETZDORFF, 2002	EMP; FTIR; ICPMS	-57.49	-30.12	52.4554	1.78688	8.52047	6.83455	15.3449	10.5093	3.39204	0.181716	0.30286	0.201907	0.64	18		14.5	34.3	205	0.018	46.2	6.11	3.54	1.4	16.1	5.2	3.48	1.26	4.67		0.511			2.99	12.3	82.7		2.43	2.21	31.2	4		141	0.198	0.913	0.224
POLAN15-2-104-001	GL	BSCO4	FRETZDORFF, 2003	ICP-MS	-57.49	-30.12	52.1892	1.70533	8.3753	7.08369	15.5801	10.5549	3.40057	0.171542	0.302722	0.181633																																	0.225
JCR039B-R049	GL	BSCO4	FRETZDORFF, 2002	EMP; FTIR; ICPMS; MS	-57.6	-30.11	50.2722	1.38923	8.11552	8.1555	16.261	11.3737	3.42811	0.129928	0.299834	0.179901	0.23	11.7		11.8	36.7	250	0.011	58.3	4.65	2.79	1.17	15	4.03	2.58	0.984	3.9		0.38			2.6	10	119	0.553	1.97	0.859	30.7	3.21		179	0.189	0.717	0.148
JCR039B-R067	GL	BSCO	FRETZDORFF, 2002	EMP; FTIR; ICPMS; MS	-60.7	-29.97	51.53	1.85	9.13	6.61	15.71	10.57	3.77	0.52	0.4	0.17	0.44	90		21	34.4	197	0.141	53.6	6.12	3.56	1.58	17.7	5.44	3.95	1.29	8.46		0.493			8.88	15.3	64.8	0.995	3.21	8.75	35.7	4.54		221	0.533	0.96	0.61
JCR039B-R066	GL	BSCO	FRETZDORFF, 2002	EMP; FTIR; ICPMS	-60.5	-29.97	51.3	1.53	8.83	7.21	15.78	11.32	3.62	0.3	0.34	0.18	0.3	49.4		14.8	35.7	190	0.068	64.6	5.04	3.16	1.29	15.4	4.48	2.92	1.06	5.43		0.41			4.49	11.3	61.8	0.673	2.27	4.48	38.6	3.49		184	0.304	0.775	0.316
POLAN15-2-109-003	GL	BSCO6	FRETZDORFF, 2002	EMP; FTIR; ICPMS	-58.61	-29.96	50.9733	1.60444	9.44726	7.62358	15.1575	11.3108	2.79033	0.169413	0.279033	0.189344	0.21	22.4		10.3	37.8	255	0.012	48.2	5.9	3.46	1.23	15.5	4.72	2.88	1.22	3.45		0.494			3.11	9.66	96	0.465	1.8	2.59	30	3.48		100	0.193	0.863	0.202
POLAN15-2-109-001	GL	BSCO6	FRETZDORFF, 2002; FRETZDORFF, 2003	ICP-MS	-58.61	-29.96	50.5907	1.47615	8.7866	7.78242	15.6452	11.287	3.5046	0.11046	0.271129	0.180753		11.5		10.8	36.9	253		53.7	5.18	2.92	1.25	14.9	4.39	2.81	1.06	3.26		0.409			1.87	10.2	86	0.705	1.95	1.26	29.1	3.41		136	0.119	0.772	0.128
SHA1974-023-004	GL	BSCO	AREVALO JR, 2008; MELSON, 2003; MUENOW, 1980	EMP; LA-ICPMS; MS; XRF	-60.07	-29.95	51.34	1.54	8.91	6.69	15.99	11.36	3.38	0.35	0.2	0.16	0.945	54		13.61					5.68	3.33	1.42		4.8		1.15	6.13		0.46				12.87			2.36			4				0.82	0.371
JCR039B-R054B	GL	BSCO6	FRETZDORFF, 2002	EMP; FTIR; ICPMS; MS	-58.38	-29.95	50.9011	2.09809	10.4507	7.20908	14.3784	10.57	3.19188	0.169041	0.367912	0.208815	0.26	21.7		15.4	36.5	198	0.033	47	8	4.87	1.7	17.9	6.6	4.26	1.71	5.07		0.694			3.47	14.6	90.8	0.742	2.78	2.03	37.7	5.14		120	0.21	1.21	0.236
POLAN15-2-110-002	GL	BSCO6	FRETZDORFF, 2002	EMP; FTIR; ICPMS	-58.74	-29.93	51.0751	1.95435	9.45946	7.03164	15.0807	11.031	2.97182	0.261923	0.352589	0.191406	0.33	29.9		12.4	30.5	204	0.027	39.2	5.9	3.48	1.22	13.8	4.78	3.16	1.23	4.37		0.502			3.92	10.7	68.7	0.594	2.1	3.76	27.2	3.62		95.6	0.227	0.87	0.264
POLAN15-2-110-003	GL	BSCO6	FRETZDORFF, 2003	ICP-MS	-58.74	-29.93	51.0322	1.98448	10.003	6.86004	14.6267	11.101	3.0019	0.271984	0.322351	0.191396																																	0.309
JCR039B-R051	GL	BSCO	FRETZDORFF, 2002	EMP; FTIR; ICPMS	-57.67	-29.9	50.95	1.73	9.41	7.47	15.07	11.14	3.18	0.13	0.32	0.2	0.36	26.1		11.7	37.8	267	0.052	60.5	6.2	3.79	1.34	16.5	5.1	3.2	1.34	3.81		0.54			2.28	11.1	119	1.57	2.1	2.34	34.5	3.9		119	0.153	0.939	0.261
JCR039B-R068	GL	BSCO8	FRETZDORFF, 2002	EMP; FTIR; ICPMS; MS	-60.2	-29.87	51.0561	1.7022	9.56617	6.62962	14.6429	11.2086	3.6234	0.328495	0.338449	0.209042	0.31	53.4		14.9	37.6	151	0.076	66.2	5.51	3.29	1.39	17	4.73	3.12	1.17	5.67		0.456			5.38	12.1	57	0.733	2.43	4.96	38.9	3.85		177	0.329	0.858	0.381
JCR039B-068	GL	BSCO8	FRETZDORFF, 2003	ICP-MS	-60.2	-29.87																																											0.382
JCR039B-R055	GL	BSCO6	FRETZDORFF, 2002	ICP-MS	-58.83	-29.87	51.1465	1.45393	8.9128	7.54849	14.6887	11.7808	3.16678	0.248961	0.278836	0.199169		17.2		10.5	38.3	251	0.049	62	5.84	3.58	1.26	17	4.76	2.88	1.26	3.39		0.506			2.49	10.1	87	0.936	1.87	1.91	37.7	3.59		125	0.223	0.874	0.165
POLAN15-2-106-001	GL	BSCO5	FRETZDORFF, 2002; FRETZDORFF, 2003	EMP; FTIR; ICPMS; MS	-57.83	-29.87	49.79	1.66	9.18	7.82	14.84	10.94	2.91	0.1	0.26	0.21	0.2	10.9		10.5	37.8	227	0.002	47.1	6.28	3.66	1.3	15.8	5.04	3.14	1.3	3.23		0.529			1.94	10.4	99.8	0.463	1.94	1.28	29.9	3.76		99.2	0.128	0.921	0.128
POLAN15-2-106-002	GL	BSCO5	FRETZDORFF, 2002	EMP; FTIR; ICPMS	-57.83	-29.87	50.6212	1.67293	9.27164	7.78012	15.6711	11.0655	2.98305	0.100779	0.302336	0.181402	0.19	10.3		10.8	38.7	231	0.003	47.1	6.47	3.77	1.34	16.1	5.14	3.21	1.33	3.22		0.562			1.94	10.7	98.5	0.445	1.98	1.37	32.1	3.86		104	0.128	0.948	0.119
POLAN15-2-108-001	GL	BSCO	FRETZDORFF, 2002; FRETZDORFF, 2003	EMP; FTIR; ICPMS; MS	-58.33	-29.86	50.63	1.68	8.74	7.68	15.24	11.14	2.95	0.17	0.28	0.18	0.24	20.8		12	36.7	252	0.017	47.1	6.27	3.64	1.35	16.1	5.11	3.25	1.28	3.97		0.524			3.23	11.1	84.8	0.636	2.07	2.68	31.3	3.91		118	0.202	0.923	0.217
POLAN15-2-107-001	GL	BSCO	FRETZDORFF, 2002; FRETZDORFF, 2003	EMP; FTIR; ICPMS; MS	-58.4	-29.85	49.32	1.44	8.05	7.93	16.34	11.32	3.47	0.14	0.27	0.15	0.25	12.1		11.6	38.5	251	0.006	60.6	4.98	2.8	1.23	15.4	4.2	2.75	1	3.88		0.403			2.45	10	91.6	0.565	1.98	1.37	29.8	3.38		179	0.157	0.746	0.152
POLAN15-2-107-003	GL	BSCO	FRETZDORFF, 2002; FRETZDORFF, 2003	EMP; FTIR; ICPMS; MS	-58.4	-29.85	50.31	1.45	8.75	8.1	15.16	11.95	2.42	0.15	0.27	0.19	0.28	19.9		8.31	38.9	278	0.013	52.5	5.21	3.07	1.05	15.1	4.09	2.39	1.09	2.85		0.437			2.67	7.98	104	0.388	1.45	2.15	29.1	2.98		84.9	0.165	0.76	0.2
JCR039B-R053	GL	BSCO5	FRETZDORFF, 2002	ICP-MS	-58.17	-29.83	50.2976	1.11393	7.25561	8.59033	16.9498	11.2397	2.78985	0.441559	0.311098	0.150531		15.1		9.22	36.3	305	0.021	64.7	4.99	3	1.15	15.3	4.18	2.48	1.07	2.98		0.422			2.26	8.97	76.1	0.588	1.69	1.19	34.5	3.15		127	0.154	0.762	0.138
JCR039B-R069	GL	BSCO	FRETZDORFF, 2002	EMP; FTIR; ICPMS; MS	-60.33	-29.71	51.33	1.58	8.69	7.22	15.67	11.02	3.5	0.37	0.33	0.18	0.34	65.4		15.7	34	200	0.1	59	5.2	3.06	1.32	16.5	4.54	3.1	1.09	6.23		0.428			6.04	12	72	0.786	2.49	6.22	32.9	3.73		189	0.355	0.805	0.448
JCR039B-R056	GL	BSCO7	FRETZDORFF, 2002	ICP-MS	-58.83	-29.62	53.4635	1.7321	10.0502	5.07546	15.317	9.55676	3.57497	0.211477	0.312181	0.191337		28.6		12.3	31.8	27.9	0.058	56.4	5.88	3.59	1.34	17.3	4.91	3.13	1.26	4.17		0.528			2.71	11.2	26.8	0.705	2.15	2.67	35.4	3.75		143	0.157	0.891	0.219
JCR039B-056	GL	BSCO7	FRETZDORFF, 2003	ICP-MS	-58.83	-29.62																																											0.216
JCR039B-R062	GL	BSCO7	FRETZDORFF, 2002	ICP-MS	-59.62	-29.55	52.5554	0.894174	8.10785	6.68119	16.4367	11.8553	2.51173	0.13061	0.261219	0.170797		26.5		4.75	33.2	223	0.054	74.8	2.84	1.79	0.686	13.6	2.28	1.23	0.613	1.53		0.262			0.76	4.67	61.8	0.566	0.854	1.48	37	1.7		124	0.048	0.426	0.121
JCR039B-062	GL	BSCO7	FRETZDORFF, 2003	ICP-MS	-59.62	-29.55																																											0.12
JCR039B-R057	GL	BSCO7	FRETZDORFF, 2002	EMP; FTIR; ICPMS	-59.3	-29.52	50.9098	1.57914	9.49468	7.34944	14.8975	11.332	3.34698	0.148975	0.317814	0.198634	0.26	16.3		11.3	37.7	262	0.021	60.4	5.59	3.41	1.3	16.1	4.62	2.89	1.19	3.76		0.481			2.32	10.4	85.3	0.577	1.99	1.39	37.8	3.58		151	0.15	0.849	0.159
JCR039B-R059	GL	BSCO7	FRETZDORFF, 2002	ICP-MS	-59.28	-29.51	56.8044	1.14553	9.938	4.28068	14.8115	8.58145	3.07485	0.281359	0.261262	0.200971		46.4		7.8	31.8	23.2	0.117	115	3.74	2.31	0.864	15.5	3.04	1.78	0.801	2.67		0.359			1.6	6.8	18.7	0.888	1.33	3.38	36	2.32		143	0.115	0.554	0.281
JCR039B-R061	GL	BSCO7	FRETZDORFF, 2002	ICP-MS	-59.42	-29.5	54.9124	0.880841	8.96856	5.63538	15.685	10.1997	2.56245	0.210201	0.250239	0.180172		32		5.99	31.6	70.1	0.082	95	2.93	1.85	0.72	14.1	2.39	1.34	0.641	2.08		0.275			0.94	5.27	35.8	0.886	1	2.83	37	1.77		135	0.058	0.439	0.22
JCR039B-R060	GL	BSCO7	FRETZDORFF, 2002	ICP-MS	-59.32	-29.5	54.98	1.69	10.78	3.58	15.16	7.67	3.49	0.21	0.28	0.22		35.3		6.88	34.1	12.4	0.074	69.7	3.73	2.32	0.882	15.7	3.04	1.73	0.816	2.24		0.341			1.43	6.53	19.1	0.682	1.22	2.2	33.6	2.25		138	0.098	0.562	0.166
JCR039B-060	GL	BSCO7	FRETZDORFF, 2003	ICP-MS	-59.32	-29.5																																											0.178
JCR039B-R058	GL	BSCO7	FRETZDORFF, 2002	EMP; FTIR; ICPMS	-59.17	-29.5	51.104	1.62644	9.69914	7.1008	14.8066	11.2165	3.34214	0.158677	0.307437	0.198346	0.24	15.3		9.65	37.3	238	0.027	62.2	4.89	2.99	1.15	15.5	4.09	2.41	1.05	3.15		0.432			2.03	8.94	91.1	0.556	1.68	1.43	37.5	3.06		140	0.128	0.745	0.14
KAK820316-020-003	GL	FIJI	SINTON, 1993	EMP; MS-ID; XRF	-13.517	171.973	49.802	2.16	8.79	6.29	16.23	10.76	3	0.81	0.28	0.13		234		36		372		72				19				19					27		188	2		11.3		5.11		270			3
KAK820316-020-016	GL	FIJI	SINTON, 1993	EMP; MS-ID; XRF	-13.517	171.973	48.872	2.08	8.76	6.16	16.37	10.79	2.97	0.88	0.36	0.12		224		30		343		67				19				18					30	21.9	176	2		9.8		4.93		256			3
KAK820316-019-007	GL	FIJI	SINTON, 1993	EMP; MS-ID; XRF	-13.543	173.477	49.252	2.04	10.13	6.41	15.85	10.93	3	0.68	0.21	0.16		199		28		430		100				19				19					24	18.65	159	2		15.4		4.76		216			2
KAK820316-016-012	GL	FIJI	MACPHERSON, 1998; SINTON, 1993	EMP; MS-ID; XRF	-16.612	174.273	49.61	1.26	9.79	8.38	16.49	12.09	2.65	0.09	0.19	0.16		3		5		383		172				17									1	7.03	220			0.58		2.54		109
SSV0708-023-001-001	GL	FIJI	LYTLE, 2012	EMP; ICPMS; SIMS	-15.148	176.588	49.46	1.82	11.07	7.05	15.17	12.05	2.97	0.21	0.15	0.22	0.45	36.5	0.45	13.7	41.2	230	0.0451	122	5.55	3.25	1.41	18.5	5	3.06	1.17	4.97	4.86	0.455			3.76	12.3	54.6	0.665	2.34	3.42	47.4	3.83		199	0.286	0.893	0.355
SON0035-164-001	GL	FIJI	JOHNSON, 1990	EMP; ICPAES; MS-ID	-16.4348	177.382	53.84	1.75	10.36	4.19	14.69	8.31	3.61	0.57	0.29	0.2		103		23.51		110	0.16		7.04	4.47	1.44		6.09	3.2		11.27		0.62			10	16.52	59			8.1	32	4.57		183
SON0035-162-001	GL	FIJI	JOHNSON, 1990	EMP; ICPAES; MS-ID	-16.4007	177.411	50.04	0.75	8.56	9.16	16.38	13.16	1.94	0.05	0.06	0.16		16		2.23		430	0.04		3.23	2.14	0.55		2.64			1.14		0.32				3.38	133			1.1	35	1.63		59
SON0035-142-001	GL	FIJI	JOHNSON, 1990	EMP; ICPAES; MS-ID	-16.318	177.423	50.12	1.61	9.47	7.53	15.86	11.39	2.78	0.3	0.17	0.16		75		17.85		304	0.1		5.54	3.55	1.2		4.88	2.9		8.42		0.48			10.3	12.93	100			8.2	39	3.4		171
SON0035-132-001A	GL	FIJI	JOHNSON, 1990	EMP; ICPAES	-16.313	177.476	50.59	1.75	12.62	6.79	14.21	11.28	2.56	0.09	0.15	0.2		24		9.29		206			6.7	4.38	1.28		5.46	2.7		3		0.64				10.23	85				43	3.35		84
SON0035-133-001A	GL	FIJI	JOHNSON, 1990	EMP; ICPAES; MS-ID	-16.3358	177.48	50.75	1.95	9.07	5.9	16	10.97	3.45	0.6	0.24	0.16		104		18.43		247	0.16		6.28	3.64	1.35		5.81	3.2		8.89		0.51			11.7	14.13	72			12.2	38	4.16		179
KAIYO87-011-006	WR	FIJI4	EISSEN, 1991	ICP	-19.2847	173.456														11.49					5.59	3.57	1.29		4.6		1.26	3.67		0.55				10.06			1.85			3.47				0.84
CHRSPS3-001-004	WR	FIJI5	EISSEN, 1991; EISSEN, 1994	AAS; ICPAES	-19.9645	173.374	50.6321	1.67437	10.9636	7.52964	14.167	11.7306	2.58675	0.0902354	0.100262	0.190497		17			44	213		76	6.1	3.7	1.35					2.4					2	10.5	74			2				106
CHRSPS3-001-005	WR	FIJI5	EISSEN, 1991; EISSEN, 1994	AAS; ICPAES	-19.9645	173.374	50.7237	1.63398	10.8535	7.52836	14.1846	11.7687	2.56626	0.100244	0.100244	0.190464		17			43	224		84	6.1	3.7	1.25					2					2.1	10.5	79			2				108
CHRSPS3-001-003	WR	FIJI5	EISSEN, 1991; EISSEN, 1994	AAS; ICPAES	-19.9645	173.374	50.1918	1.54591	10.4891	7.88012	14.5657	12.1063	2.53971	0.080307	0.100384	0.180691		20			44	277		80	5.9	3.8	1.15					1.8					1.7	9.5	90			2				112
CHRSPS3-DT-001	WR	FIJI5	EISSEN, 1991; EISSEN, 1994	AAS; ICPAES	-19.9933	173.375	49.9223	1.61395	10.637	7.58858	14.4654	12.5307	2.47606	0.11027	0.100245	0.190466		20			43	240		82	5.8	3.8	1.2					2.8					2.1	11	71			2.5				112
CHRSPS3-DT-005	WR	FIJI5	EISSEN, 1991; EISSEN, 1994	AAS; ICPAES	-19.9933	173.375	50.1621	1.47476	10.0856	7.91557	14.5871	12.7211	2.34758	0.0902917	0.100324	0.180583		15			44	197		83	4.8	3.4	1.1					2					1.8	8	75			2				104
KAIYO87-011-002	WR	FIJI4	EISSEN, 1991; EISSEN, 1994	AAS; ICPAES	-19.2847	173.456	49.6131	1.83528	10.6093	7.79491	14.9243	11.5663	2.67225	0.161343	0.201679	0.181511		20			40	264		69	5.9	3.7	1.3					3.7					3.6	13	101			3.5				117
KAIYO87-011-008	WR	FIJI4	EISSEN, 1991; EISSEN, 1994	AAS; ICPAES	-19.2847	173.456	49.8476	1.85363	10.5958	7.72513	14.9793	11.3923	2.67524	0.160314	0.150294	0.180353		25			40	262		70	6.3	3.8	1.5					3.8					3.3	12	104			3.5				118
KAIYO87-010-010	WR	FIJI4	EISSEN, 1991; EISSEN, 1994	AAS; ICPAES	-18.8252	173.497	50.3579	1.81289	11.2127	7.35226	14.3017	11.2902	2.57833	0.221575	0.151074	0.19136		40			44	148		69	5.8	3.4	1.35					4.6					4.6	13	71			5.5				141
KAIYO87-010-006	WR	FIJI4	EISSEN, 1991; EISSEN, 1994	AAS; ICPAES	-18.8252	173.497	50.4267	1.80454	11.1881	7.31839	14.2859	11.2382	2.59653	0.220554	0.200504	0.190479		49			40	137		68	5.3	3.6	1.35					4.5					5.2	12	69			5				141
KAIYO87-010-002	WR	FIJI4	EISSEN, 1991; EISSEN, 1994	AAS; ICPAES	-18.8252	173.497	50.6178	1.58369	10.9786	7.78813	14.2532	11.7574	2.32541	0.09021	0.0801867	0.190443		20			40	272		71	5.8	3.6	1.15					2.1					2	9	98			3.5				84
CHRSPS3-004-002	WR	FIJI4	EISSEN, 1991; EISSEN, 1994	AAS; ICPAES	-18.5667	173.522	49.526	1.54642	10.543	7.85341	15.0397	12.3209	2.52684	0.0606441	0.101073	0.19204		25			44	295		71	6	3.8	1.2					2.6					1.5	8.5	97			2				94
CHRSPS3-004-005	WR	FIJI4	EISSEN, 1991; EISSEN, 1994	AAS; ICPAES	-18.5667	173.522	50.0791	1.57406	10.3948	7.74998	14.9586	12.0912	2.49644	0.0701809	0.100258	0.180465		17			44	297		73	6	3.7	1.15					2					1.8	10	93			2				96
CHRSPS3-005-001	WR	FIJI2	EISSEN, 1991; EISSEN, 1994	AAS; ICPAES	-16.303	173.552	49.1	1.61	8.082	7.43	16.02	12.13	2.66	0.31	0.2	0.15		45			46	303		71	4.8	3.3	1.25					6					7.4	13	119			5				191
CHRSPS3-005-005	WR	FIJI2	EISSEN, 1991; EISSEN, 1994	AAS; ICPAES	-16.303	173.552	50.0681	1.61219	8.11104	7.98086	16.0118	12.1966	2.58352	0.390531	0.100136	0.160218		64			43	305		70	4.8	3	1.15					5.8					7.6	12	114			7				181
KAIYO87-009-004	WR	FIJI3	EISSEN, 1991; EISSEN, 1994	AAS; ICPAES	-17.6008	173.769	48	0.93	8.658	7.23	16.26	12.02	2.4	0.16	0.1	0.56		77			52	315		160	4.7	2.8	1.15					7					3	11	106			3.5				178
KAIYO87-009-006	WR	FIJI3	EISSEN, 1991; EISSEN, 1994	AAS; ICPAES	-17.6008	173.769	49.6	1.02	8.64	7.48	16.1	11.89	2.49	0.15	0.12	0.45		60			51	322		135	4.6	3.1	1.1					6.1					2.2	10	101			3.5				166
KAIYO87-006-005	WR	FIJI3	EISSEN, 1991; EISSEN, 1994	AAS; ICPAES	-17.331	173.821	51.15	1.59	11.295	6.38	13.68	10.47	2.97	0.26	0.12	0.21		66			46	115		74	6.2	3.8	1.3					4.1					4.3	11.5	41			5				120
KAIYO87-006-006	WR	FIJI3	EISSEN, 1991; EISSEN, 1994	AAS; ICPAES	-17.331	173.821	51	1.62	11.592	6.41	13.66	10.53	2.94	0.1	0.12	0.21		49			46	116		114	6.2	4	1.5					4.8					4.3	13	42			5				118
KAIYO87-006-001	WR	FIJI3	EISSEN, 1991; EISSEN, 1994	AAS; ICPAES	-17.331	173.821	50.8106	1.35226	10.0632	7.44752	14.8042	11.9483	2.77516	0.131189	0.100915	0.171555		10			40	159		91	4.7	3.2	1.2					3					2.7	9.5	49			4				121
KAIYO87-005-002	WR	FIJI3	EISSEN, 1991; EISSEN, 1994	AAS; ICPAES	-17.1583	173.872	51.6198	1.44335	11.2852	6.68552	13.9524	11.0056	2.97691	0.200465	0.120279	0.210489		33			46	101		81	5.9	4	1.35					3.2					3.9	10.5	40			5				113
KAIYO87-005-006	WR	FIJI3	EISSEN, 1991; EISSEN, 1994	AAS; ICPAES	-17.1583	173.872	50.325	2.48866	11.4789	6.78359	13.9686	11.0685	2.85995	0.210733	0.100349	0.200698		25			43	92		77	5.9	4.2	1.3					3.5					3.5	11	42			5				113
KAIYO87-005-005	WR	FIJI3	EISSEN, 1991; EISSEN, 1994	AAS; ICPAES	-17.1583	173.872	50.1681	2.47336	11.6258	6.87933	13.9189	11.075	2.88391	0.190258	0.100136	0.200272		25			43	93		78	6	4.1	1.35					4					3.4	11	42			5				114
KAIYO87-002-008	WR	FIJI3	EISSEN, 1991; EISSEN, 1994	AAS; ICPAES	-16.911	173.911	50.9	1.58	9.972	6.84	14.3	11.21	2.88	0.17	0.1	0.19		30			43	123		84	5.6	3.1	1.04					4.3					2.8	11.2	50			5				129
KAIYO87-002-003	WR	FIJI3	EISSEN, 1991; EISSEN, 1994	AAS; ICPAES	-16.911	173.911	51.8143	1.56401	10.1439	7.00275	14.2981	11.3214	2.93631	0.171537	0.100904	0.191718		30			40	129		88	5.6	3.1	1.03					4.3					2.5	10.7	50			5				126
KAIYO87-002-007	WR	FIJI3	EISSEN, 1991; EISSEN, 1994	AAS; ICPAES	-16.911	173.911	51.8467	1.59373	10.0496	7.19196	14.2225	11.1561	2.89494	0.221912	0.100869	0.191651		35			41	126		82	5.5	3.1	1.02					5.6					2.2	12.5	51			5				128
KAIYO87-002-002	WR	FIJI3	EISSEN, 1991; EISSEN, 1994	AAS; ICPAES	-16.911	173.911	51.7083	1.56234	10.26	6.89444	14.3836	11.3093	2.94324	0.171353	0.120955	0.191512		30			40	129		87	5.5	3	1.05					4.4					2.3	11	50			4.5				130
KAIYO87-002-004	WR	FIJI3	EISSEN, 1991; EISSEN, 1994	AAS; ICPAES	-16.911	173.911	51.9269	1.51957	10.162	7.0846	14.3604	11.2307	2.89824	0.130824	0.100633	0.191204		30			40	129		86	5.6	2.9	1.03					4.5					6.1	10.7	49			5				125
KAIYO87-4DTB-002	WR	FIJI3	EISSEN, 1991; EISSEN, 1994	AAS; ICPAES	-16.98	173.918	49.6	1.84	7.038	7.89	16.82	10.16	2.89	0.87	0.4	0.14		232			36	220		53	4.9	2.5	1.41					18.7					24.8	21.3	150			18				269
KAIYO87-4DTB-001	WR	FIJI3	EISSEN, 1991; EISSEN, 1994	AAS; ICPAES	-16.98	173.918	51.5637	1.66853	10.2404	6.75455	14.3032	10.6545	3.09583	0.452313	0.201028	0.190977		140			44	56		78	5.8	3.3	1.22					10.7					13.1	13.8	45			11				160
KAIYO87-4DTA-003	WR	FIJI3	EISSEN, 1991; EISSEN, 1994	AAS; ICPAES	-16.972	173.922	49	1.85	7.38	8.13	16.55	10.64	2.31	0.76	0.35	0.2		180			32	213		57	5	2.3	1.43					17.6					23.6	21.2	159			16				260
KAIYO87-4DTA-007	WR	FIJI3	EISSEN, 1991; EISSEN, 1994	AAS; ICPAES	-16.972	173.922	49.25	1.9	8.316	7.3	15.7	10.65	2.88	0.78	0.35	0.13		191			32	209		67	4.9	2.4	1.48					17.8					23.9	20.1	145			17				267
KAIYO87-4DTA-004	WR	FIJI3	EISSEN, 1991; EISSEN, 1994	AAS; ICPAES	-16.972	173.922	49.8566	1.87213	8.17228	8.07917	15.9181	10.7022	2.76314	0.770875	0.350398	0.160182		199			31	215		57	4.9	2.6	1.46					18.2					22.5	20.2	157			17				260
KAIYO88-003-006	WR	FIJI6	EISSEN, 1991; EISSEN, 1994	AAS; ICPAES	-21.0363	174.148	49.0282	2.29132	9.38339	9.11524	15.3588	10.1258	3.04175	0.410236	0.250144	0.180104		60			41	226		51	5.8	3.5	1.65					10					10	19	182			7.2				253
KAIYO88-003-028	WR	FIJI6	EISSEN, 1991; EISSEN, 1994	AAS; ICPAES	-21.0363	174.148	49.1975	1.9899	9.22454	9.31953	15.3792	10.4395	2.82986	0.39998	0.249987	0.169991		70			41	231		54	5.4	3.1	1.4					8.8					8.6	16	184			6.6				246
KAIYO88-004-015	WR	FIJI6	EISSEN, 1991; EISSEN, 1994	AAS; ICPAES	-21.179	174.184	50	1.4	8.982	7.53	15.1	12.27	2.47	0.12	0.08	0.18		50			41	236		77	4.9	3	0.8					2.7					1.6	10	69			2.8				115
KAIYO88-004-017	WR	FIJI6	EISSEN, 1991; EISSEN, 1994	AAS; ICPAES	-21.179	174.184	50.4969	1.49881	9.95856	7.50413	15.4408	11.6384	2.37396	0.211242	0.100592	0.261538		50			42	269		85	4.8	3.2	0.85					4.1					1.8	10.5	70			4.3				127
KAIYO88-004-016	WR	FIJI6	EISSEN, 1991; EISSEN, 1994	AAS; ICPAES	-21.179	174.184	51.2094	1.49444	9.5405	7.96038	14.8448	11.8559	2.46084	0.0697405	0.0797034	0.179333		50			40	273		75	4.7	3	0.8					2.3					1.7	10	70			2.2				120
KAIYO88-004-014	WR	FIJI6	EISSEN, 1991; EISSEN, 1994	AAS; ICPAES	-21.179	174.184	50.9246	1.41457	8.69356	7.27495	15.6613	12.6402	2.61696	0.141457	0.0505205	0.17177		36			41	231		80	4.6	3.3	0.8					2.4					1.4	9	75			3				113
KAIYO88-005-002	WR	FIJI6	EISSEN, 1991; EISSEN, 1994	AAS; ICPAES	-21.396	174.199	51.85	1.19	9.09	5.7	15.3	9.94	3.18	0.46	0.12	0.17		100			33	5		93	4.2	2.7	1.15					6.5					1.7	11.5	25			6.3				358
KAIYO87-011-005	WR	FIJI4	EISSEN, 1991; NOHARA, 1994	AAS; ICP-MS	-19.2847	173.456	49.8678	1.82614	10.6107	7.7561	14.8098	11.4887	2.65895	0.16054	0.200675	0.180608		16		8.45	39	265		70	4.29	2.71	1.01		3.59	2.12	0.95	2.82		0.39			3.32	7.71	101		1.43	1.68		2.61		113		0.66
KAIYO87-010-001	WR	FIJI4	EISSEN, 1991; NOHARA, 1994	AAS; ICP-MS; XRF	-18.8252	173.497	50.2004	1.55238	11.0683	7.80224	14.546	11.784	2.32857	0.0907237	0.100804	0.191528		10		6.27	41	272		76	4.44	2.86	0.91		3.2	1.34	0.98	1.94		0.46			1.83	6.15	98		1.12	0.97		2.34		74		0.66
KAIYO87-006-003	WR	FIJI3	EISSEN, 1991; NOHARA, 1994	AAS; ICP-MS	-17.331	173.821	51	1.24	9.657	7.39	14.24	11.76	2.81	0.12	0.1	0.18		17		7.3	46	183		93	3.93	2.44	0.85		2.89	1.6	0.85	2.47		0.39			2.45	6.34	49		1.19	1.3		2.29		99		0.61
KAIYO87-006-002	WR	FIJI3	EISSEN, 1991; NOHARA, 1994	AAS; ICP-MS; XRF	-17.331	173.821	50.6546	1.52465	9.92128	7.5029	14.8252	12.0066	2.76845	0.130398	0.100306	0.17052		20		9.02	41	160		91	4.86	3.1	1.06		3.63	1.75	1.08	3.08		0.49			3.75	7.74	50		1.5	2.05		2.86		105		0.75
KAIYO87-005-004	WR	FIJI3	EISSEN, 1991; NOHARA, 1994	AAS; ICP-MS	-17.1583	173.872	51.8499	1.48576	11.1978	6.79203	13.8468	10.9663	2.9513	0.151608	0.121286	0.212251		22		9.77	47	108		80	5.08	3.29	1.13		4.17	1.72	1.15	3.46		0.53			3.54	8.61	40		1.56	2.55		3.01		109		0.84
KAIYO87-005-001	WR	FIJI3	EISSEN, 1991; NOHARA, 1994	AAS; ICP-MS; XRF	-17.1583	173.872	51.623	1.47351	11.2498	6.79619	13.8129	11.0764	2.95704	0.200478	0.100239	0.210501		22		9.39	46	110		80	5.11	3.29	1.15		3.87	1.79	1.11	3.17		0.51			2.87	8.23	43		1.49	2.08		2.91		86		0.84
KAIYO87-002-001	WR	FIJI3	EISSEN, 1991; NOHARA, 1994	AAS; ICP-MS	-16.911	173.911	51.2	1.53	10.08	6.9	14.24	11.19	2.9	0.17	0.1	0.19		19		6.47	40	135		88	3.35	2.02	0.73		2.6	1.4	0.64	2.1		0.26			2.31	5.72	50		1.01	1.45		2.01		80		0.45
KAIYO87-002-006	WR	FIJI3	EISSEN, 1991; NOHARA, 1994	AAS; ICP-MS	-16.911	173.911	51.2	1.57	10.026	6.93	14.2	11.08	2.89	0.18	0.1	0.19		25		8.46	40	128		82	4.3	2.68	1.01		3.37	1.74	0.98	2.98		0.41			2.73	7.56	53		1.36	1.87		2.69		93		0.68
KAIYO87-002-009	WR	FIJI3	EISSEN, 1991; NOHARA, 1994	AAS; ICP-MS	-16.911	173.911	51.5	1.55	10.017	6.89	14.09	11.03	2.89	0.16	0.1	0.19		25		8.95	41	126		83	4.56	2.83	1.05		3.75	1.87	1.02	3.08		0.46			2.51	7.96	50		1.48	1.99		2.82		88		0.68
KAIYO87-002-005	WR	FIJI3	EISSEN, 1991; NOHARA, 1994	AAS; ICP-MS; XRF	-16.911	173.911	50.5	1.5	9.72	7.11	14.8	11.35	2.9	0.14	0.1	0.18		21		8.65	38	246		98	4.32	2.8	1.03		3.08	1.71	0.91	2.81		0.41			2.69	7.54	59		1.43	1.26		2.59		116		0.66
KAIYO88-003-001	WR	FIJI6	EISSEN, 1991; NOHARA, 1994	AAS; ICP-MS	-21.0363	174.148	48.8096	2.27443	9.41069	9.05745	15.4983	10.2249	3.03928	0.422681	0.251596	0.181149		54		22.52	41	293		51	5.32	3.26	1.5		5.4	3.4	1.15	8.68		0.45			9.67	15.37	178		3.2	6.7		4.24		222		0.88
KAIYO88-005-001	WR	FIJI6	EISSEN, 1991; NOHARA, 1994	AAS; ICP-MS	-21.396	174.199	52.45	1.17	8.865	5.5	15.48	10.42	3.18	0.45	0.12	0.17		50		14.63	33	7		100	4.48	2.89	1.17		4.08	2.25	0.99	5.4		0.28			1.51	11.4	25		2.27	7.23		3.25		28		0.71
YOK0090-012-002	WR	FIJI2	EISSEN, 1994	ICPAES; AAS	-15.632	173.358	49.5	1.67	11.52	6.72	13.99	10.76	2.84	0.13	0.18	0.18		25			45	84			6.2	4.5	1.15					4.7					5.25	13	36			2.5	43			106
YOK0090-011-002	WR	FIJI2	EISSEN, 1994	ICPAES; AAS	-15.972	173.393	48.85	1.55	9.135	7.41	16.15	11.72	2.67	0.43	0.21	0.17		74			39	280			5.5	3.8	1.25					8.8					8.65	15	94			9	39			191
YOK0090-011-001	WR	FIJI2	EISSEN, 1994	ICPAES; AAS	-15.972	173.393	48.7	1.54	9.072	7.25	16.1	11.56	2.7	0.45	0.21	0.16		71			38	290			5		1.4					8.5					8	15	92			9	38			192
YOK0090-011-003	WR	FIJI2	EISSEN, 1994	ICPAES; AAS	-15.972	173.393	47.6	1.15	8.64	8.1	16.9	12.16	2.45	0.14	0.13	0.15		13			44	310			4.3	3.1	1					2.85					1.45	9	150			4	35			150
YOK0090-011-007	WR	FIJI2	EISSEN, 1994	ICPAES; AAS	-15.972	173.393	48.85	1.55	8.505	7.58	16.15	11.72	2.71	0.14	0.21	0.14		59			39	270			5.6	3.2	1.3					8.85					8.7	15	94			2.1	39			194
YOK0090-011-004	WR	FIJI2	EISSEN, 1994	ICPAES; AAS	-15.972	173.393	47.9	1.51	8.793	8.09	16.18	11.36	2.6	0.12	0.2	0.14		63			37	270			5	3.5	1.3					8.65					8.35	14	108			2.5	36			208
YOK0090-011-005	WR	FIJI2	EISSEN, 1994	ICPAES; AAS	-15.972	173.393	49.1518	1.56483	9.17232	7.4831	16.3405	11.8466	2.69833	0.461425	0.220681	0.170526		71			37	280			5.4	3.2	1.45					8.55					8.7	16	95			9	39			193
YOK0090-011-006	WR	FIJI2	EISSEN, 1994	ICPAES; AAS	-15.972	173.393	48.9933	1.58464	9.38746	7.36153	16.4481	11.7845	2.74804	0.441291	0.220645	0.170499		74			38	290			5.5	3.2	1.35					9					8.65	16	89			8	40			196
YOK0090-009-001	WR	FIJI2	EISSEN, 1994	ICPAES; AAS	-16.442	173.592	49	1.17	8.568	9.85	14.9	11.3	2.45	0.43	0.22	0.16		98			44	320			3.4	2.2	1					7.8					8.5	12	220			9	34			193
YOK0090-009-003	WR	FIJI2	EISSEN, 1994	ICPAES; AAS	-16.442	173.592	48.55	1.2	8.532	9.89	15.08	11.25	2.49	0.38	0.21	0.16		96			42	325			3.8	2.1	1.05					8.3					9.4	12	215			8	35			196
YOK0090-009-002	WR	FIJI2	EISSEN, 1994	ICPAES; AAS	-16.442	173.592	48.9	1.22	8.1	9.45	15.3	11.6	2.49	0.53	0.22	0.15		97			45	290			3.7	2.5	1					8.1					9.55	13	220			11	35			197
NADSTM1-006-003	WR	FIJI3	EISSEN, 1994	ICPAES; AAS	-17	173.92	50.3	1.52	9.927	7.14	14.28	11.78	2.94	0.29	0.1	0.19		58			4	92			5.8	3.3	1					4.8					3.5	10.8	46			5	41.5			143
NADSTM1-002-006	WR	FIJI3	EISSEN, 1994	ICPAES; AAS	-17	173.92	49.8	1.68	8.46	7.48	15.7	11.72	2.82	0.5	0.1	0.16		107			37	269			5.1	2.8	1.24					10.7					13.6	15	85			11	35.5			200
NADSTM1-005-001	WR	FIJI3	EISSEN, 1994	ICPAES; AAS	-17	173.92	48.8	2.38	7.596	7.5	16.52	10.28	3.18	1.03	0.4	0.14		245			37	185			5.3	2.5	1.75					23					31.7	25.2	100			22	27.8			316
NADSTM1-002-008	WR	FIJI3	EISSEN, 1994	ICPAES; AAS	-17	173.92	49	2.35	7.713	7.5	16.52	10.36	3.19	1.02	0.4	0.14		235			35	190			5.3	2.4	1.71					22.5					32.4	24.7	109			22	28			313
NADSTM1-003-001	WR	FIJI3	EISSEN, 1994	ICPAES; AAS	-17	173.92	48.5	2.25	7.362	7.89	17.08	10.35	3.05	1.01	0.4	0.14		246			34	177			5	2.4	1.63					21.4					30	23.4	128			21	25.8			320
NADSTM1-002-003	WR	FIJI3	EISSEN, 1994	ICPAES; AAS	-17	173.92	48.8	2.33	7.641	7.61	16.58	10.32	3.18	0.97	0.4	0.14		249			34	190			5.4	2.6	1.69					22.1					30.8	24.9	109			22	27.3			314
NADSTM1-003-005	WR	FIJI3	EISSEN, 1994	ICPAES; AAS	-17	173.92	48.9	2.27	7.578	7.56	16.5	10.46	3.14	0.95	0.4	0.14		235			34	190			5.4	2.4	1.66					21.7					30.2	24.4	105			23	28.2			305
NADSTM1-001-003	WR	FIJI3	EISSEN, 1994	ICPAES; AAS	-17	173.92	51.161	1.82575	9.99446	6.81144	14.3953	10.9444	3.0496	0.451421	0.300947	0.1906		112			41	52			5.8	3.4	1.24					11					12.3	16.3	45			12	36.3			178
NADSTM1-002-005	WR	FIJI3	EISSEN, 1994	ICPAES; AAS	-17	173.92	51.1185	1.38404	9.31953	7.66778	14.5779	12.1533	2.91961	0.151537	0.101025	0.181844		35			43	210			5.1	2.7	0.93					4.7					3.6	10	57			4	41.4			140
NADSTM1-003-006	WR	FIJI3	EISSEN, 1994	ICPAES; AAS	-17	173.92	50.7431	1.55356	9.60587	7.42483	14.6277	11.914	2.99616	0.26229	0.100881	0.181586		72			40	141			5.3	3	1.09					6.4					6.3	12.1	43			5	40.7			156
NADSTM1-003-003	WR	FIJI3	EISSEN, 1994	ICPAES; AAS	-17	173.92	51.1091	1.66167	9.86128	7.08981	14.4012	11.6015	3.04137	0.302123	0.100708	0.181274		70			46	119			5.6	3.3	1.18					7					7.5	12.1	43			6	40.7			154
NADSTM1-003-002	WR	FIJI3	EISSEN, 1994	ICPAES; AAS	-17	173.92	50.7652	1.33699	9.77105	7.71028	14.5359	12.3143	2.68402	0.180945	0.0502626	0.180945		37			39	189			5	2.7	0.84					3.1					2.3	9.2	57			3.5	40.6			116
NADSTM1-002-004	WR	FIJI3	EISSEN, 1994	ICPAES; AAS	-17	173.92	51.0312	1.55705	9.4478	7.30308	14.566	11.914	2.92324	0.311411	0.100455	0.180819		64			43	207			5.4	3	1					6.2					5.9	13	57			7	39.3			153
KAIYO88-DT9/10-002	WR	FIJI6	EISSEN, 1994	ICPAES	-21.425	174.175																			4	2.8	1.3					3.7					2.3	12.5
YOK0090-012-003	WR	FIJI2	EISSEN, 1994; NOHARA, 1994	ICPAES; ICP-MS	-15.632	173.358	49.3	1.35	10.215	7.62	14.75	11.6	2.5	0.1	0.14	0.2		19		8.02	44	125			5.02	3.15	1.05		3.49	2.22	0.96	2.74		0.49			2.42	7.22	69		1.48	1.3	42	2.58		96		0.76
YOK0090-012-004	WR	FIJI2	EISSEN, 1994; NOHARA, 1994	ICPAES; ICP-MS	-15.632	173.358	49.75	1.65	9.99	6.79	14.72	11.55	2.85	0.16	0.19	0.19		34		12.12	46	88			5.85	3.61	1.17		4.35	2.95	1.11	4.64		0.54			7.49	9.37	50		2.01	2.38	43	3.54		147		0.85
YOK0090-012-001	WR	FIJI2	EISSEN, 1994; NOHARA, 1994	ICPAES; ICP-MS	-15.632	173.358	49.6	1.7	11.7	6.5	14	10.85	2.8	0.14	0.19	0.19		30		9.2	43	75			3.78		0.92		2.98	2.39	0.75	3.01		0.33			4.47	7.54	37		1.26	0.1	42	2.35		108		0.57
YOK0090-010-001	WR	FIJI2	EISSEN, 1994; NOHARA, 1994	ICPAES; ICP-MS; XRF	-15.993	173.488	48	2.27	8.451	6.76	16.2	9.54	3.07	1.32	0.51	0.15		408		71.86	33	175			5.03	2.64	2.25		6.61	4.71	0.86	35.94		0.35			62.81	35.57	112		9.01	25.32	28	7.04		381		1.06
YOK0090-DT8/9-007	WR	FIJI2	EISSEN, 1994; NOHARA, 1994	ICPAES; ICP-MS	-16.305	173.545	49.2225	2.20756	8.27833	9.09871	15.5623	9.54618	3.10251	0.894955	0.387814	0.149159		195		32.25	37	325			4.13	2.08	1.34		4.41	4.49	0.91	14.28		0.28			22.06	17.52	217		3.86	21	30	4.08		265		0.71
YOK0090-DT8/9-001	WR	FIJI2	EISSEN, 1994; NOHARA, 1994	ICPAES; ICP-MS; XRF	-16.305	173.545	49.7375	1.38965	8.77279	7.73805	16.2759	11.857	2.56935	0.439889	0.189952	0.169957		60		13.34	40	290			2.91	1.66	0.81		2.62	2.62	0.56	5.18		0.25			7.52	8.18	104		1.64	6.98	37	2.31		180		0.49
YOK0090-DT8/9-005	WR	FIJI2	EISSEN, 1994; NOHARA, 1994	ICPAES; ICP-MS	-16.305	173.545	49.6273	1.36903	8.87856	7.83166	16.3076	12.0495	2.55686	0.332191	0.191262	0.161062		62		15.32	39	295			4.13	2.47	1.13		3.42	2.23	0.78	6.3		0.36			10.87	10.92	106		2.36	5.97	37	3.24		180		0.65
YOK0090-DT8/9-004	WR	FIJI2	EISSEN, 1994; NOHARA, 1994	ICPAES; ICP-MS	-16.305	173.545	49.5781	1.38779	8.84261	7.88423	16.392	11.947	2.56439	0.341918	0.191072	0.160903		65		16.99	40	295			4.38	2.62	0.89		2.94	2.36	0.82	6.99		0.38			11.9	11.51	104		2.6	6.59	37	3.05		193		0.63
YOK0090-DT8/9-006	WR	FIJI2	EISSEN, 1994; NOHARA, 1994	ICPAES; ICP-MS	-16.305	173.545	49.6507	1.3714	8.74793	7.46762	16.3367	11.8521	2.57263	0.580593	0.190194	0.160164		68		16.72	39	292			4.02	2.41	1.07		3.25	2.16	0.76	6.94		0.34			9.5	11.14	104		2.49	6.68	37	3.07		159		0.63
YOK0090-DT8/9-002	WR	FIJI2	EISSEN, 1994; NOHARA, 1994	ICPAES; ICP-MS	-16.305	173.545	49.7745	1.36656	8.61827	7.93001	16.2091	11.9698	2.53361	0.418944	0.189522	0.159598		50		14.69	41	295			4.29	2.57	1.11		3.32	2.18	0.79	6.13		0.37			10.89	10.64	112		2.29	5.98	37	3.07		167		0.65
NADSTM1-002-007	WR	FIJI3	EISSEN, 1994; NOHARA, 1994	ICPAES; ICP-MS	-17	173.92	49.3	2.28	7.668	7.46	16.52	10.43	3.1	1	0.4	0.15		221		32.93	35	193			3.77	1.96	1.48		4.46	2.85	0.74	15.31		0.26			22.64	17.14	109		3.96	17	28.1	4.12		222		0.7
NADSTM1-002-009	WR	FIJI3	EISSEN, 1994; NOHARA, 1994	ICPAES; ICP-MS	-17	173.92	48.8	1.97	7.056	8.18	17.02	10.7	2.86	0.74	0.3	0.13		169		27	35	212			3.7	2.05	1.34		4	2.68	0.73	12.35		0.27			22.64	14.87	148		3.33	19	27.2	3.58		255		0.65
YOK0090-011-001-1	WR	FIJI2	NOHARA, 1994	ICP-MS; XRF	-15.972	173.393												64		13.04					3.51	2.13	0.79		3.08	2.18	0.69	5.38		0.23			7.28	8.57			1.74	3.54		2.53		201		0.49
YOK0090-011-001-3	WR	FIJI2	NOHARA, 1994	ICP-MS	-15.972	173.393												90		21.73					5.03	3.06	1.43		4.47	2.82	0.93	9.06		0.46			11.19	14.87			3.21	5.18		3.85		249		0.88
YOK0090-011-001-6	WR	FIJI2	NOHARA, 1994	ICP-MS	-15.972	173.393												81		22.18					5.16	3.19	1.53		4.66	2.98	1	9.44		0.47			11	15.38			3.35	6.83		4.05		209		0.93
YOK0090-011-002-1	WR	FIJI2	NOHARA, 1994	ICP-MS	-15.972	173.393												29		12.92					5.56	3.59	1.37		4.43	2.53	1.05	4.51		0.52			4.04	11.41			2.2	5.29		3.76		119		0.96
YOK0090-011-002-5	WR	FIJI2	NOHARA, 1994	ICP-MS	-15.972	173.393												31		13.09					5.67	3.53	1.39		4.66	2.36	1.09	4.57		0.55			4.81	11.82			2.23	3.04		3.75		131		0.98
KAIYO87-011-001	WR	FIJI4	NOHARA, 1994	ICP-MS	-19.2847	173.456														11.08					5.66	3.56	1.21		4.93		1.18	3.55		0.46				10.22			1.78			3.47				0.82
KAIYO87-011-003	WR	FIJI4	NOHARA, 1994	ICP-MS	-19.2847	173.456												15		11.43					5.95	3.72	1.33		4.65	1.97	1.27	3.7		0.54			3.18	10.63			1.92	1.53		3.58		111		0.93
KAIYO87-011-004	WR	FIJI4	NOHARA, 1994	ICP-MS	-19.2847	173.456												24		11.86					6.03	3.8	1.34		4.93	1.86	1.33	4.14		0.54			2.57	10.91			1.96	1.17		3.72		86		0.96
KAIYO87-010-003	WR	FIJI4	NOHARA, 1994	ICP-MS	-18.8252	173.497												10		6.46					4.48	2.9	0.91		3.2	1.23	0.99	2.02		0.47			1.81	6.25			1.07	0.93		2.46		72		0.69
KAIYO87-010-004	WR	FIJI4	NOHARA, 1994	ICP-MS; XRF	-18.8252	173.497												31		9.52					4.19	2.6	0.94		3.22	1.53	0.89	3.61		0.43			3.86	7.63			1.45	2.27		2.5		98		0.65
KAIYO87-010-007	WR	FIJI4	NOHARA, 1994	ICP-MS	-18.8252	173.497												12		6.37					4.21	2.77	0.96		3.06	1.51	0.98	2.04		0.42			1.41	6.33			1.1	0.72		2.34		58		0.68
KAIYO87-010-011	WR	FIJI4	NOHARA, 1994	ICP-MS	-18.8252	173.497														8.11					5.48	3.4	1.12		4.41		1.18	2.56		0.46				8.04			1.42			2.93				0.77
YOK0090-058-001-1	WR	FIJI2	NOHARA, 1994	ICP-MS	-16.305	173.545												226		33.74					2.98	1.54	1.15		3.31	2.47	0.56	16.24		0.2			40.61	16.43			3.97	22.16		3.47		368		0.53
YOK0090-058-001-2	WR	FIJI2	NOHARA, 1994	ICP-MS	-16.305	173.545												262		46.25					3.8	2.04	1.38		4.05	3.03	0.71	21.5		0.26			41.63	21.16			5.37	18.3		4.54		384		0.64
YOK0090-058-002-1	WR	FIJI2	NOHARA, 1994	ICP-MS	-16.305	173.545												96		17.4					2.86	1.72	0.94		2.83	1.52	0.59	7.19		0.22			10.99	10.03			2.21	10.72		2.56		199		0.47
YOK0090-058-002-2	WR	FIJI2	NOHARA, 1994	ICP-MS	-16.305	173.545												96		17.88					3.29	2.03	0.99		3.21	1.7	0.71	7.9		0.27			9.86	10.53			2.35	10.98		2.71		190		0.56
YOK0090-DT8/9-003	WR	FIJI2	NOHARA, 1994	ICP-MS	-16.305	173.545												61		12.47					3.34	2.02	0.81		3.1	2.1	0.67	5.17		0.31			7.17	8.35			1.63	4.56		2.49				0.5
YOK0090-009-001-4	WR	FIJI2	NOHARA, 1994	ICP-MS; XRF	-16.442	173.592												82		15.62					3.63	2.17	0.93		3.02	1.95	0.67	6.82		0.32			10.89	9.74			2.3	7.74		2.6		183		0.55
YOK0090-009-001-5	WR	FIJI2	NOHARA, 1994	ICP-MS	-16.442	173.592												65		13.39					3.68	2.22	1.01		3.07	1.81	0.7	5.51		0.33			9.95	8.7			2.02	10.16		2.68		190		0.59
YOK0090-009-001-6	WR	FIJI2	NOHARA, 1994	ICP-MS	-16.442	173.592												87		18.01					3.15	1.93	0.96		2.96	1.95	0.6	8.06		0.27			15.38	11.1			2.55	8.83		2.23		220		0.55
YOK0090-009-001-7	WR	FIJI2	NOHARA, 1994	ICP-MS; XRF	-16.442	173.592												74		15.26					2.47	1.33	0.74		2.75	2.21	0.54	6.59		0.17			9.65	8.93			1.87	5.76		2.28		224		0.39
KAIYO87-009-009	WR	FIJI3	NOHARA, 1994	ICP-MS	-17.6008	173.769												13		5.82					2.83	1.76	0.72		2.09	1.11	0.59	1.85		0.33			1.67	4.98			0.95	1.61		1.67		129		0.43
KAIYO87-009-013	WR	FIJI3	NOHARA, 1994	ICP-MS	-17.6008	173.769												12		5.35					2.47	1.6	0.65		2.01	1.11	0.54	1.73		0.24			1.67	4.57			0.94	1.46		1.57		120		0.37
KAIYO87-009-014	WR	FIJI3	NOHARA, 1994	ICP-MS	-17.6008	173.769												14		6.09					3.19	1.8	0.71		2.28	1.25	0.63	2.02		0.27			1.64	5.31			0.97	1.59		1.74		112		0.45
NADSTM1-002-021-3	WR	FIJI3	NOHARA, 1994	ICP-MS; XRF	-17	173.92												22		7.18					3.2	2.09	0.82		2.64	1.86	0.71	2.59		0.29			2.84	5.88			1.16	2.4		2		122		0.51
NADSTM1-002-021-5	WR	FIJI3	NOHARA, 1994	ICP-MS; XRF	-17	173.92												143		27.73					3.93	2.1	1.32		4.31	2.7	0.76	12.7		0.26			22.95	14.91			3.4	15.25		3.87		231		0.62
KAIYO88-003-009	WR	FIJI6	NOHARA, 1994	ICP-MS	-21.0363	174.148														19.67					5.09	2.96	1.32		4.69		1.07	7.18		0.2				13.21			2.83			3.77				0.78
KAIYO88-004-001	WR	FIJI6	NOHARA, 1994	ICP-MS	-21.179	174.184												7		3.67					3.85	2.56	0.75		2.91	1.52	0.88	1.02		0.41			1.28	4.69			0.74	2.36		1.84		96		0.58
6K#76-14-R03	Tholeiite	FIJI	Shimizu et al., 2019	FTIR	-18.8233	173.497	49.1311	1.22828	10.0764	8.42504	15.7487	12.558	2.51638	0.0558748	0.0997188	0.182534	0.129054	8.12497		6.67931	42.226	324.203		79.3113	5.06734	3.31742	1.03812	15.0168	3.94323	1.94262	1.09013	2.10803		0.480824			1.42755	7.15028	95.972	0.335259	1.27855	0.68251	44.3981	2.6857		84.247	0.0926722	0.741205	0.101363
KY88-14-DT7	Tholeiite	FIJI	Shimizu et al., 2019	FTIR	-18.8282	173.499	49.2189	1.61957	11.2337	7.50944	15.3157	11.7511	2.88225	0.210988	0.167445	0.194715	0.317404	38.2414		13.6765	41.2153	134.678		68.8083	5.97285	3.81024	1.30385	17.1307	5.12526	2.65904	1.24606	5.41026		0.552952			5.33122	11.1606	64.5256	0.611334	2.20242	3.27583	43.8443	3.63907		151.17	0.338179	0.85564	0.43557
6K#86-14-R02	Tholeiite	FIJI	Shimizu et al., 2019	FTIR	-18.8333	173.502	49.5738	1.66092	12.1643	7.22487	14.4353	11.801	2.71094	0.0828134	0.142903	0.213945	0.229318	13.0775		10.0508	43.8752	109.269		69.9182	6.92533	4.70351	1.34169	17.3719	5.4701	2.85335	1.52639	3.22009		0.665407			2.12922	10.325	57.0478	0.474593	1.80781	1.12608	49.6736	3.79547		96.4078	0.138458	0.989835	0.180949
KNO0138-11-010-005	GL	CHIL27	STURM, 1999	ICP-MS	-45.91	-75.951																																13.01		0.619		2.89		4.48		117			0.341
KNO0138-11-012-008	GL	CHIL27	STURM, 1999	ICP-MS	-45.9198	-75.9148																																18.2		9.356		71.65		4.24		150			8.134
KNO0138-11-014-009	GL	CHIL27	KARSTEN, 1996;STURM, 1999	DCP; ICP-MS	-45.9532	-75.9343	50.7849	1.26603	8.85043	8.57204	14.7489	12.4174	2.69378	0.0700985	0.124174	0.167235		14.4		7.91		377	0.015	78	4.59	2.71	1.04		3.85	1.99	1	2.52		0.416			1.76	8.02	95	0.332	1.46	1.02	38.5	2.81		123	0.119	0.74	0.132
KNO0138-11-015-003	GL	CHIL27	STURM, 1999	ICP-MS	-45.9662	-75.9417																																								124
KNO0138-11-020-001	GL	CHIL27	KARSTEN, 1996;STURM, 1999	DCP; ICP-MS	-46.0405	-75.8967	51.2255	1.35886	8.78775	8.0393	15.1206	11.6706	2.87478	0.17047	0.135165	0.163409		27.8		10.45		320	0.171	66	4.95	2.97	1.1		4.27	2.38	1.08	3.55		0.45			2.3	9.33	98	0.767	1.75	4.44	37.4	3.06		133	0.166	0.808	0.497
KNO0138-11-033-003	GL	CHIL26	STURM, 1999	ICP-MS	-45.7092	-76.8687																																6.9		0.305		2.62		2.54		66			0.236
KNO0138-11-034-001	GL	CHIL26	KARSTEN, 1996;STURM, 1999	DCP; ICP-MS	-45.7813	-76.7798	50.7967	1.41358	9.40325	8.72019	14.8134	11.4585	2.78884	0.0464807	0.117212	0.172787		13.1		7.18		317	0.014	66	5.3	3.18	1.12		4.44	2.28	1.16	1.89		0.485			1.2	8.57	136	0.315	1.45	1.11	36.9	3.15		88	0.078	0.852	0.117
KNO0138-11-035-002	GL	CHIL26	STURM, 1999	ICP-MS	-45.8335	-76.7625																																8.36		0.436		0.32		2.64		231			0.078
KNO0138-11-041-001	GL	CHIL25	STURM, 1999	ICP-MS	-45.6385	-77.846																																14.32		1.266		13.65		3.86		292			1.223
KNO0138-11-042-004	GL	CHIL25	KARSTEN, 1996;STURM, 1999	DCP; ICP-MS	-45.6462	-77.8892	50.8165	1.22237	8.24114	8.17716	15.4801	11.646	2.77904	0.445845	0.168941	0.153947		163		18.88		305	0.362	84	3.95	2.23	1.17		3.81	2.21	0.83	7.88		0.332			5.81	12.56	95	1.313	2.71	12.34	35.6	3.35		255	0.347	0.682	1.441
KNO0138-11-043-001	GL	CHIL25	STURM, 1999	ICP-MS	-45.5058	-77.9627																																11.46		1.085		10.76		3.16		275			1.282
KNO0138-11-047-001	GL	CHIL25	STURM, 1999	ICP-MS	-45.2423	-78.108																																10.29		0.878		9.02		2.99		214			1.006
KNO0138-11-051-001	GL	CHIL25	STURM, 1999	ICP-MS	-44.7908	-78.276																																9.02		0.522		3.43		3.01		107			0.415
KNO0138-11-053-002	GL	CHIL25	KARSTEN, 1996;STURM, 1999	DCP; ICP-MS	-44.5388	-78.3152	50.8683	1.17347	8.69922	8.77606	15.4212	11.9609	2.38612	0.0899849	0.130428	0.16076		14.5		8.29		351	0.031	71	4.61	2.84	0.94		3.81	2.04	1.02	2.66		0.443			1.75	8	133	0.348	1.49	1.35	35.9	2.74		103	0.116	0.737	0.175
KNO0138-11-058-004	GL	CHIL24	STURM, 1999	ICP-MS	-44.9517	-81.9367																																7.5		0.286		1.17		2.8		85			0.192
KNO0138-11-059-007	GL	CHIL24	STURM, 1999	ICP-MS	-44.7665	-82.008																																7.42		0.301		4.12		2.52		184			0.555
KNO0138-11-061-001	GL	CHIL23	KARSTEN, 1996;STURM, 1999	DCP; ICP-MS	-44.4635	-82.1803	50.09	1.43	9.603	8.28	14.88	11.04	2.69	0.075	0.147	0.176		17.4		10.8		290	0.013	66	6.4	3.9	1.26		5.16	2.73	1.42	3.39		0.583			2.86	10.26	133	0.322	1.88	1.31	37.1	3.67		99	0.191	0.984	0.166
KNO0138-11-062-002	GL	CHIL23	STURM, 1999	ICP-MS	-44.1947	-82.2348																																6.93		0.274		0.44		2.59		85			0.084
KNO0138-11-063-005	GL	CHIL23	KARSTEN, 1996;STURM, 1999	DCP; ICP-MS	-43.873	-82.4273	48.5566	0.986166	9.55657	9.24603	16.4849	10.6986	2.80486	0.450782	0.168292	0.172299		115		16.48		307	0.143	75	3.93	2.52	0.87		3.13	1.93	0.9	8.41		0.43			10.2	8.71	164	1.054	2.06	11.36	35	2.35		150	0.595	0.618	1.132
KNO0138-11-065-001	GL	CHIL22	STURM, 1999	ICP-MS	-43.4373	-82.5772																																9.34		0.639		6		2.83		139			0.619
KNO0138-11-066-002	GL	CHIL22	STURM, 1999	ICP-MS	-43.1105	-82.6407																																9.65		0.755		6.3		2.81		155			0.738
KNO0138-11-066-004	GL	CHIL22	STURM, 1999	ICP-MS	-43.1105	-82.6407																																10.44		0.354		1.67		3.62		100			0.284
SON0040-020-G	GL	CHIL9	BACH, 1996	XRF; ICP-MS	-38.5547	-92.61	50.1221	1.8208	10.2205	8.01354	15.1067	11.2049	2.82124	0.0600265	0.160071	0.180079		9.9		11.2	46	273		56	6.3	3.9	1.42		5.2	3.25	1.4	3.04		0.55			1.04	11.8	111	0.48	1.97	0.43		3.96		104	0.06	0.95	0.071
SON0040-031-002G	GL	CHIL7	BACH, 1996	XRF; ICP-MS	-38.0982	-93.9173	50.2657	1.29911	9.49652	9.01385	15.1896	11.792	2.32841	0.0499659	0.119918	0.169884		7.4		7.8	44	354		58	4.9	3.1	1.1		4	2.15	1.1	2.12		0.44			1	8.2	148	0.36	1.36	0.61		2.93		85	0.06	0.75	0.063
SON0040-048-G	GL	CHIL3	BACH, 1996	XRF; ICP-MS	-36.8858	-97.0562	50.4166	1.68721	10.2331	7.81706	14.9752	11.3812	2.74546	0.0698843	0.179703	0.189686		6.9		12.7	55	190		65	6.2	4	1.4		5.2	3.1	1.4	3.72		0.54			1.68	12	91	0.45	2.1	0.58		4		120	0.11	0.96	0.12
SON0040-056-G	GL	CHIL3	BACH, 1996	XRF; ICP-MS; MS-ID	-36.839	-97.061	49.5166	1.2479	8.68337	9.10466	16.4723	11.7802	2.61559	0.0399327	0.119798	0.159731		5.1		8.53	46	373		63	4.3	2.7	0.94		3.5	2.2	0.95	2.43		0.37			0.73	7.8	153	0.424	1.4	0.29		2.7		130.4	0.05	0.64	0.053
SON0040-058G-G	GL	CHIL3	BACH, 1996	XRF; ICP-MS	-36.839	-97.0528	50.3747	1.86906	11.1294	7.27635	14.4927	11.0944	3.00849	0.0699649	0.17991	0.1999		5.5		13	43	170		54	6.6	4.2	1.45		5.4	3.3	1.48	4		0.57			1.45	12.2	79	0.53	2.2	0.5		4.1		119	0.09	1	0.1
SON0040-R008-GL	GL	CHIL9	BACH, 1996	XRF; ICP-MS; MS-ID	-38.712	-92.5688	50.299	1.16998	8.76182	8.78982	15.7997	12.0998	2.46995	0.0599988	0.099998	0.159997		6.8		6.8	44	359		65	4.5	2.8	1.03		3.6	1.85	1	2.02		0.4			1.3	7.02	110	0.34	1.14	0.474		2.6		97	0.08	0.68	0.08
SON0040-R049-G	GL	CHIL3	BACH, 1996	XRF; ICP-MS	-36.887	-97.06	49.7481	1.07888	8.73989	9.14047	16.0832	12.2872	2.40749	0.0299688	0.0799167	0.159833		4.6		4.9	37	353		66	4.3	2.7	0.97		3.4	1.65	0.95	1.3		0.35			0.54	6.2	133	0.26	1.04	0.26		2.4		74	0.03	0.65	0.039
WASPASC-3-003	GL	CHIL1	RUBIN, 1990	ICP-MS-ID; ALPHA	-34.485	-109.233												13.14																															0.33
WASPASC-3-003-D	GL	CHIL1	MACDOUGALL, 1986; WHITE, 1993	MS-ID; ICP-MS	-34.485	-109.233	50.3344	1.98715	11.1966	6.84911	14.6262	11.2975	2.86472	0.100871	0.201741	0.191654																						12.9		0.4		1.01		4.41		122			0.199
END0112-002-001	GL	CHIL	MELSON, 2003; MICHAEL, 1987; MICHAEL, 1988; MICHAEL, 1989; MICHAEL, 1995; MICHAEL, 1998; TANG, 2017	CALC; EMP; FTIR; LA-ICPMS; XRF	-35.367	-105.583	48.41	1.05	8.34	9.2	16.69	11.8	2.27	0.06	0.14	0.15				6.85					3.84	2.41	0.91		3.32		0.83	2.31		0.32			2.5	6.31			1.17	1.5		2.26		105.9		0.59
SON0040-007	WR	CHIL	BACH, 1996	COUL; MS; MS-ID; TITR; XRF	-38.7832	-92.3143	50.2	1.34	9.0716	8.45	15.6	12	2.55	0.08	0.1	0.17				7.26	42	298		61								1.89					0.62		117	0.328		0.108
SON0040-007-G	GL	CHIL	BACH, 1996	COUL; ICPMS; TITR; XRF	-38.7832	-92.3143	50.5	1.36	9.28573	8.44	15.4	11.9	2.6	0.04	0.11	0.17		4.6		6.9	42	313		61	4.8	3	1.1		3.9	2.28	1.08	1.89		0.45			0.6	7.9	107	0.27	1.26	0.23		2.9		89	0.04	0.73	0.04
SON0040-019	WR	CHIL	BACH, 1996	COUL; MS; MS-ID; TITR; XRF	-38.5497	-92.3622	50.6	1.33	8.14363	8.06	16.2	12	2.99	0.12	0.12	0.15				9.34	42			71								2.47					0.74	9	94	0.5		1.164		3.07		134.9
SON0040-020-001	WR	CHIL	BACH, 1996	COUL; MS; MS-ID; TITR; XRF	-38.5547	-92.61	49.9	1.77	10.0666	7.98	15.5	11.2	2.83	0.08	0.16	0.17				11.48	41			57								3.14					1.23	11.6	118	0.426		0.212		4.17		118.1
SON0040-020-005	WR	CHIL	BACH, 1996	COUL; MS; MS-ID; TITR; XRF	-38.5547	-92.61	50	1.82	10.2116	7.99	15.2	11.2	2.78	0.07	0.16	0.19				11.59	44	280		56								3.22					1.21		109	0.53		0.069				89.7
SON0040-031-001G	GL	CHIL	BACH, 1996	COUL; MS; MS-ID; TITR; XRF	-38.0982	-93.9173	50.4	0.92	8.68673	9.54	15.8	12.7	1.77	0.04	0.08	0.16				4.52	53	319		75								1.29					0.54	4.83	165	0.16		0.24		1.89		65.3
SON0040-031-006	WR	CHIL	BACH, 1996	COUL; MS; MS-ID; TITR; XRF	-38.0982	-93.9173	50.1	1.3	9.36365	8.94	15.2	11.7	2.33	0.06	0.12	0.17					49	354		57													1.1		145			0.268				88.3
SON0040-047	WR	CHIL	BACH, 1996	COUL; MS; MS-ID; TITR; XRF	-36.8818	-97.1675	50.2	1.1	8.3476	8.58	16.1	12.5	2.63	0.08	0.08	0.16				6.02	43	354		74								1.61					0.75		97			0.228				94.1
SON0040-047-G	GL	CHIL	BACH, 1996	COUL; ICPMS; TITR; XRF	-36.8818	-97.1675	50.3	1.12	8.80074	8.81	15.8	12.3	2.53	0.04	0.09	0.16		5.5		5.8	46	361		72	4.2	2.6	0.98		3.3	1.78	0.93	1.56		0.38			0.67	6.4	96	0.25	1.05	0.26		2.35		95	0.04	0.64	0.048
SON0040-048	WR	CHIL	BACH, 1996	COUL; MS; MS-ID; TITR; XRF	-36.8858	-97.0562	50.4	1.74	10.4565	7.77	15.1	11.1	2.82	0.15	0.19	0.19				12.05	46	239		56								3.58					1.57		91			0.529				121.9
ENV7025-070-VG954	GL	JUAN	Jenner and O'Neil, 2012	LA-ICP-MS	50	-129.45	49.02	1.02	9.96	8.47	17.29	11.81	2.51	0.03	0.08			10.707	0.261941	6.31466	49.636	254.132	bdl	98.1818	4.04683	2.63823	0.971178	17.0302	3.01786	1.48668	0.915616	2.07567	4.02794	0.392399	1414.36	0.423346	1.88314	5.8561	167.251	0.221035	1.05417	0.895434	38.7845	2.29691	0.680377	106.145	0.106302	0.590091	0.115103
ENV7906-032-001	GL	JUAN	MICHAEL, 1987; MICHAEL, 1988; MICHAEL, 1989; MICHAEL, 1995; MICHAEL, 2015	COL; EMP; FTIR; LA-ICPMS	49.99	-129.88	49.5	1.23		9.58	15.87	12.24	2.16	0.288	0.14		0.228	75.9		17.53			0.0523		4.1	2.49	1.12		3.7	2.2	0.87	7.62		0.334			9.49	11.32	219	0.536	2.39	5.31	36.9	3.13		185	0.571	0.62	0.713
ENV7714-036-002	GL	JUAN	MICHAEL, 1987; MICHAEL, 1988; MICHAEL, 1989; MICHAEL, 1995; MICHAEL, 1998; MICHAEL, 2015	EMP; FTIR; LA-ICPMS	49.92	-130.18	48.74	1.09		8.8	17.26	12	2.25	0.037	0.09		0.094	5.33		5.75					4.22	2.77	0.9		3.36	1.55	0.95	1.77		0.372			0.9	6.15	135	0.235	1.03	0.342	42.8	2.37		104	0.055	0.58	0.056
ENVCSM5-008-001	GL	JUAN4	JENNER, 2012; MICHAEL, 1987; MICHAEL, 1989; MICHAEL, 1995; MICHAEL, 1998; REEKIE, 2019	CHN; EMP; IMP; LA-ICPMS	49.85	-130.17	50.43	1.64	10.44	6.93	14.53	11.71	2.52	0.48	0.21		0.411	114.17	0.68	25.09	44.12	98.65	0.09	74.63	4.34	2.75	1.29	18.14	3.97	2.59	0.92	11.66	5.07	0.38	0.19		17.08	14.07	49.37	1.02	3.23	8.81	43.4	3.7	1.04	180.88	0.92	0.66	1.16
ENVCSM5-C013-001	GL	JUAN	Jenner and O'Neil, 2012	LA-ICP-MS	49.77	-130.19	51	1.42	10.4	7.2	14.54	12	2.4	0.25	0.2			60.0423	0.518014	15.8691	46.3149	97.2673	0.0489945	86.8014	4.70592	2.93224	1.21721	18.0837	3.91291	2.22322	1.02251	6.69599	4.99015	0.393673	1445.52	0.727701	8.69588	10.7406	53.2008	0.59631	2.31066	4.81171	44.8133	3.25434	0.907729	144.192	0.473026	0.676327	0.576696
ENVCSM5-C013-002	GL	JUAN	Jenner and O'Neil, 2012	LA-ICP-MS	49.77	-130.19	50.93	1.42	10.39	7.22	14.46	12	2.41	0.24	0.21			59.8243	0.50628	15.7981	46.3791	102.287	0.0431185	85.1366	4.5449	2.83517	1.20351	18.3985	3.83563	2.2825	0.97347	6.65637	5.08255	0.398149	1476.7	0.703907	8.51639	10.8479	51.1751	0.597412	2.22716	4.73251	45.6359	3.35731	0.923588	143.911	0.464442	0.671094	0.590663
ENVCSM5-C013-003	GL	JUAN	Jenner and O'Neil, 2012	LA-ICP-MS	49.77	-130.19	51.33	1.42	10.01	7.06	14.36	12.1	2.3	0.23	0.14			60.2162	0.501307	15.7764	46.1744	102.181	0.0405691	85.5839	4.59916	2.87739	1.21115	18.3907	3.97846	2.19983	0.999524	6.66672	5.09663	0.398966	1486.54	0.708987	8.73743	10.8614	52.2362	0.567285	2.20003	4.76383	45.8335	3.28438	0.934558	143.431	0.472315	0.673927	0.564755
ENVCSM5-C013-004	GL	JUAN	Jenner and O'Neil, 2012	LA-ICP-MS	49.77	-130.19	50.81	1.44	10.68	7.29	14.52	11.8	2.48	0.24	0.15			60.1982	0.497359	15.7607	46.2147	99.6786	0.0367766	86.3841	4.50142	2.79612	1.17713	18.1931	4.1029	2.27545	0.958345	6.6764	5.12811	0.401795	1456.02	0.765593	8.5832	10.6029	52.1993	0.559869	2.23545	4.59451	45.1858	3.17795	0.952309	144.649	0.495644	0.714445	0.540883
ENVCSM5-005-004	GL	JUAN	Jenner and O'Neil, 2012	LA-ICP-MS	49.58	-130.43	51.2	1.51	10.25	6.91	14.57	11.8	2.56	0.23	0.19			47.2196	0.554171	16.9102	42.1555	247.542	0.0517213	78.4544	5.54676	3.5543	1.26714	18.182	4.75604	3.00281	1.2215	6.67824	6.54913	0.491953	1434.4		8.08705	12.1337	62.496	0.581258	2.51359	5.4355	42.2249	3.8668	1.30748	114.806	0.434397	0.837877	0.758242
ENVCSM5-005-005	GL	JUAN	Jenner and O'Neil, 2012	LA-ICP-MS	49.58	-130.43	51.03	1.47	10.23	6.92	14.82	11.7	2.59	0.22	0.21			45.3806	0.541927	16.6383	42.5666	256.383	0.0473754	79.8851	5.4744	3.52913	1.33399	18.3626	4.78995	2.97122	1.19116	6.57089	6.41847	0.486128	1437.91		7.83592	11.9922	63.6771	0.574031	2.37035	5.24785	42.3585	3.80051	1.34481	112.433	0.430038	0.810249	0.687413
ENVCSM5-005-006	GL	JUAN	Jenner and O'Neil, 2012	LA-ICP-MS	49.58	-130.43	50.79	1.48	10.2	6.87	14.74	11.8	2.61	0.21	0.2			45.2738	0.574384	16.4865	42.7108	253.371	0.0622506	78.5376	5.55051	3.48717	1.29642	18.2517	4.69141	2.98188	1.25046	6.59657	6.55602	0.469662	1423.7		7.84882	11.7188	62.9767	0.60569	2.40729	5.35435	41.2098	3.74919	1.29782	113.582	0.438991	0.818282	0.705693
ENVCSM5-006-001	GL	JUAN	JENNER, 2012; MICHAEL, 1989; MICHAEL, 1995; MICHAEL, 1998; REEKIE, 2019	CHN; EMP; IMP; LA-ICPMS; XRF	49.56	-130.28	49.4	1.09	8.31	8.86	16.49	12.8	2.08	0.16	0.16	0.15	0.166	25.93	0.41	10.12	42.89	363.43	0.019	85.21	3.3	2.08	0.89	15.58	2.67	1.59	0.71	3.95	4.12	0.3			5.08	7.33	162.6	0.428	1.5	2.1	35.61	2.31	0.699	136.65	0.3	0.49	0.33
ENVCSM5-006-002	GL	JUAN	Jenner and O'Neil, 2012	LA-ICP-MS	49.56	-130.28	49.71	1.42	8.87	8.2	16.09	11.9	2.42	0.18	0.18			30.9703	0.50139	13.4193	42.2696	332.39	0.0194808	72.6018	4.30906	2.6074	1.13577	17.2381	3.82571	2.18523	0.950655	5.12693	4.69404	0.378757	1237.42		6.63942	9.9444	142.587	0.545275	2.01645	2.69376	36.986	3.10383	0.948819	135.942	0.380551	0.662257	0.389022
ENVCSM5-006-003	GL	JUAN	Jenner and O'Neil, 2012	LA-ICP-MS	49.56	-130.28	49.97	1.42	9.06	8.24	16.33	11.9	2.43	0.17	0.2			30.4589	0.501522	13.4636	42.5238	337.395	0.0203188	72.3199	4.37302	2.69099	1.12422	17.2195	3.64361	2.24726	0.951803	5.16217	4.9385	0.385185	1229.68		6.61881	10.2231	140.739	0.514579	2.00159	2.64291	36.8494	3.20032	0.920907	138.465	0.372921	0.651945	0.3991
ENVCSM5-006-004	GL	JUAN	Jenner and O'Neil, 2012	LA-ICP-MS	49.56	-130.28	49.77	1.39	8.78	8.16	16.26	12.2	2.42	0.17	0.19			30.8359	0.497694	13.4194	42.6838	331.769	0.029264	69.0153	4.58622	2.74052	1.15295	16.8345	3.90083	2.29534	0.917404	5.11562	4.88599	0.388093	1225.72		6.77898	10.1214	140.902	0.554575	2.0327	2.77183	36.7546	3.22265	0.942852	137.596	0.388723	0.664971	0.386453
ENVCSM5-006-005	GL	JUAN	Jenner and O'Neil, 2012	LA-ICP-MS	49.56	-130.28	49.23	1.09	8.35	8.96	16.39	12.7	2.05	0.14	0.16			25.5988	0.402524	10.2556	43.1459	362.953	0.0303905	84.822	3.22342	2.06024	0.863081	15.8429	2.74725	1.57384	0.697756	3.92135	4.07811	0.289778	1147.69		5.10324	7.38457	164.788	0.459638	1.50721	2.0507	36.7168	2.21259	0.713806	135.449	0.297506	0.470268	0.306662
ENVCSM5-006-006	GL	JUAN	Jenner and O'Neil, 2012	LA-ICP-MS	49.56	-130.28	49.67	1.11	8.32	8.84	16.26	12.7	1.97	0.16	0.17			25.3528	0.37839	9.96671	43.9301	374.766	0.0197283	89.0095	3.3419	2.06739	0.882441	16.0165	2.8097	1.5572	0.718138	3.90119	4.05344	0.301492	1170.26		5.0435	6.97006	163.609	0.416831	1.47129	2.15926	37.9597	2.32228	0.718758	132.773	0.292213	0.498637	0.301375
ENV7123-003-005	GL	JUAN	GRAHAM, 2016; MELSON, 2003; MICHAEL, 2015	EMP; FTIR; LA-ICPMS; MS	48.517	-128.917	50.13	1.07	8.36	8.54	16.51	12.33	2.58	0.02	0.1		0.06	0.64		3.93					4.1	2.59	0.94		3.51	1.48	0.88	0.93		0.368			0.21	5.46	120	0.191	0.81	0.043	36.8	2.35		74	0.018	0.57	0.014
TUL1987-006-005	GL	JUAN5	VAN WAGONER, 1991	ICP-MS	48.483	-129.042	50.3395	2.06778	11.0315	6.93611	13.8421	11.4732	3.10168	0.210793		0.260982		29.4		13.42					5.92	3.72	1.3		4.36	3.3	1.26	5.03	4.4	0.56			3.1	11.07			2.15	2.2	27	3.71		96		0.88	0.45
TUL1987-006-023	GL	JUAN5	VAN WAGONER, 1991	ICP-MS	48.483	-129.042	50.5582	1.84086	10.9345	6.87053	14.2138	11.6286	2.92727	0.191127		0.140831		10		7.05					3.94	2.56	0.83		3.06	1.9	0.85	2.41	3.6	0.35			2.2	6.59			1.21	0.9	21	2.39		64		0.59	0.14
TUL1988-003-001	GL	JUAN5	VAN WAGONER, 1991	ICP-MS	48.445	-129.033	49.8963	2.36884	11.5431	6.41395	14.183	10.991	3.19192	0.301124		0.180675		70		25.52					7.53	4.65	1.81		5.92	4.4	1.6	10.35	8.4	0.64			15.2	16.19			3.63	6.7	43	5.13		154		1.15	0.92
TUL1987-012-005	GL	JUAN5	VAN WAGONER, 1991	ICP-MS	48.392	-129.125	49.4326	1.70974	10.2485	8.35874	15.2777	11.6183	2.50962	0.109983		0.209968		15		11.09					5.97	3.83	1.25		4.24	3	1.24	3.68	5.9	0.54			3.2	10.18			1.87	1.5	36	3.62		96		0.9	0.28
TUL1987-011-002	GL	JUAN5	VAN WAGONER, 1991	ICP-MS	48.383	-129.117	49.8763	1.22187	8.33275	8.94368	15.5137	12.7495	2.43372	0.140215		0.200306		34		12.49					4.63	2.95			3.66	2.4	0.98	5.03	4.6	0.41			5.3	9.48			1.92	3.1	35	2.96		128		0.7	0.5
ENV7115-008-001	GL	JUAN5	LEYBOURNE, 1991; KARSTEN, 1988, MICHAEL, 1995	ICP-MS; EMP; FTIR	48.31	-129.07	50.2931	1.22032	9.65101	8.22635	14.6649	12.7466	2.6036	0.0299265	0.10973	0.209485	0.102	5.9		5.18					4.41	2.77	0.94		3.1	1.8	0.98	1.48	4.1	0.39			0.93	5.9			1	0.43	38	2.31		77		0.63	0.1
ENV1986-001-004	GL	JUAN7	VAN WAGONER, 1991	ICP-MS	48	-129.167	50.6324	1.6317	9.08379	7.80032	14.8246	12.0985	3.04451	0.129342		0.189038		25		11.62		323			5.34	3.41	1.28	19	4.07	2.6	1.14	4.02	5	0.48			4.1	9.89	83			2.1	36	3.45		134		0.8	0.26
ENV1986-001-005	GL	JUAN7	VAN WAGONER, 1991	ICP-MS	48	-129.167	49.5035	1.80158	8.66762	7.79686	15.8339	11.6903	3.22283	0.320282		0.190167		54		21.4		273		56	4.8	3.07	1.34	21	4.1	3.2	1	8.74	4.2	0.4			2.3	14.12	121		3.11	4.7	32	3.94		230		0.77	0.67
WFL2002-464-005	WR	JUAN	Gill et al., 2016	XRF , TIMS, MC-ICP-MS	47.9974	-129.066	51.4492	1.59441	9.62275	7.2035	14.8189	11.7245	2.68247	0.502336	0.22	0.185864		73.11		21.4579		91	0.08	62	5.01845	2.98246	1.30573	17	4.62389	2.68	1.0434	9.8448		0.461102			13.32	13.1353	43	0.78	2.91826	6.1	44.16	3.79498		208.79	0.85	0.787427	0.7
WFL2011-D265-R005		JUAN	Gill et al., 2016	EPMA, LA	47.9962	-129.065	50.5968	1.1906	9.916	8.13227	14.6912	12.682	2.2094	0.149	0.0996	0.1828		30.2084		9.45235	38.4419	173.619			4.34309	2.89846	1.01756		3.92273	1.75188	0.942997	3.5677		0.400936			3.99457	7.77643	56.0715	0.295479	1.49146	2.19268	42.5454	2.42856		109.411	0.252761	0.614664	0.290949
WFL2002-463-002	WR	JUAN	Gill et al., 2016	XRF	47.9959	-129.081	50.9465	1.53854	8.67487	7.35124	15.6465	12.3726	2.60105	0.482049	0.21893	0.167713		70.8801		21.22		241.947	0.08	68	4.43	2.62	1.23	16	4.16	2.55434	0.94	9.68		0.39			13.02	12.68	69.8942	0.66	2.88	5.8	43.7	3.55		225.812	0.86	0.71	0.72
WFL2002-464-001	WR	JUAN	Gill et al., 2016	EPMA/ICPMS	47.9958	-129.072	50.6123	1.40948	8.91649	7.7957	15.4079	12.3868	2.50711	0.440833	0.20905	0.18088		64.7908		19.3636		285.408	0.0690202	76.6253	4.38	2.54416	1.20617	16.2889	4.10865	2.47178	0.910246	8.95665		0.380749			12.3114	12.0378	73.0106	0.598389	2.65569	5.32402	44.2867	3.51376		233.208	0.789806	0.694641	0.618911
WFL2002-463-001	GL-Mn	JUAN	Gill et al., 2016	EPMA , TIMS, MC-ICP-MS, FTIR	47.9956	-129.082	50.8783	1.5857	9.43	7.37761	15.139	11.9912	2.61411	0.481218	0.222283	0.158689	0.38	73.648		21.875		254.781	0.068	89	4.833	2.895	1.316	16	4.428	2.718	1.043	9.612		0.394			14.68	13.681	64.113	0.801	3.015	5.627	43.351	3.716		228.085	1.248	0.769	N/A
R1078-0847	GL	JUAN	Gill et al., 2016	EPMA, FTIR	47.9956	-129.066	50.0327	1.80707	10.2851	7.36615	14.7671	11.5559	2.84032	0.332091	0.248599	0.195849	0.369	65.3696		21.3666	42.0653	191.818	0.0564277		5.68547	3.44384	1.59411		5.16009	3.19143	1.1998	8.94521		0.495744			12.7648	14.9902	68.1627	0.662387	3.1258	5.86223	41.737	4.37963		195.556	0.788949	0.917631	0.719864
WFL2002-463-004	GL-Mn	JUAN	Gill et al., 2016	EPMA, FTIR	47.9953	-129.073	51.0382	1.46297	9.08586	7.58313	15.42	12.28	2.46119	0.417908	0.221035	0.16	0.371	63.8995		19.2323		283	0.0673193	73	4.1779	2.43261	1.1677	17	3.93487	2.37392	0.860882	9.03298		0.364559			11.8473	11.7959	77	0.859521	2.61845	5.09704	41.8169	3.29274		220.665	0.770863	0.660622	0.729962
WFL2002-464-002	WR	JUAN	Gill et al., 2016	XRF	47.9951	-129.072	50.4902	1.36633	8.76505	7.59202	15.9825	12.5425	2.41906	0.488553	0.193026	0.160712		65.6585		19.4478		281.309	0.069147	75.17	4.36753	2.55445	1.187	16.3494	4.08042	2.42426	0.885578	9.07231		0.386023			12.42	12.1375	71.5868	0.640369	2.70333	5.54537	45.6137	3.44524		233.452	0.783473	0.694234	0.63432
WFL2002-464-003	GL-Mn	JUAN	Gill et al., 2016	EPMA , TIMS, MC-ICP-MS, FTIR	47.995	-129.072	51.1342	1.66225	9.92037	7.04567	14.96	11.47	2.69318	0.499776	0.266869	0.16	0.438	86.0517		24.1917		92	0.0852452	65	5.00314	2.91346	1.39873	16	4.79869	2.96734	1.03508	11.7001		0.440308			15.5131	14.7863	48	N/A	3.3306	6.74442	43.4424	4.09442		233.713	0.994969	0.79609	N/A
WFL2011-D265-R001		JUAN	Gill et al., 2016	EPMA, LA	47.995	-129.066	50.9704	1.2236	9.9114	8.12535	14.6094	12.821	2.233	0.1538	0.1042	0.1664		30.558		9.54392	38.2044	176.114			4.35321	2.99352	1.02249		3.86801	1.85679	0.987517	3.76506		0.392549			4.24356	7.86514	58.7801	0.344329	1.46713	2.28492	43.0432	2.70743		109.938	0.261289	0.606052	0.287255
WFL2002-463-003	WR	JUAN	Gill et al., 2016	EPMA/ICPMS, FTIR	47.9939	-129.078	50.9149	1.52939	9.15395	7.49556	15.19	12.1703	2.5441	0.472642	0.22928	0.157481	0.347	66.4		19.5681		280	0.07	71	4.18548	2.43165	1.1941	18	4.01972	2.35	0.882478	8.99		0.372132			11.97	11.7456	73	0.62	2.66325	5.46	43.1	3.31918		226.49	0.78	0.659331	0.63
WFL2004-737-004	GL	JUAN	Gill et al., 2016	EPMA, TIMS, MC-ICP-MS, FTIR	47.989	-129.08	50.9732	1.47125	9.11656	7.8869	14.98	12.1804	2.49646	0.402809	0.204807	0.157332	0.33	66.5865		18.483	41.3918	234.904	0.0570785		4.55097	2.65013	1.18793		3.96131	2.32547	0.954491	8.31829		0.375457			12.3553	11.6934	65.0954	0.632007	2.56588	5.39115	40.4554	3.33799		205.289	0.732392	0.70769	0.74663
WFL2004-737-005	WR	JUAN	Gill et al., 2016	EPMA, TIMS, MC-ICP-MS, FTIR	47.9888	-129.08	49.6449	1.94739	9.48332	7.51889	15.9457	11.0128	2.90204	0.49677	0.319026	0.190782	0.494	97.5674		26.7838	40.1843	286.759	0.100839		5.45196	3.22599	1.48518		5.18923	3.44122	1.17229	11.8705		0.420065			18.7546	16.6549	127.779	0.841537	3.70065	9.21053	36.8751	4.46727		225.39	1.15562	0.899217	1.18776
WFL2004-737-007	GL	JUAN	Gill et al., 2016	EPMA, TIMS, MC-ICP-MS, FTIR	47.9884	-129.077	50.7058	1.61764	9.41072	7.69776	14.8703	11.7847	2.7	0.355513	0.219014	0.194433	0.313	67.5951		18.924	41.6399	165.735	0.0655345		4.87058	2.82781	1.24802		4.38779	2.5615	1.03678	8.16815		0.384076			12.1172	12.418	67.9773	0.604819	2.66066	5.96607	43.2676	3.57944		178.738	0.726169	0.781297	0.757686
WFL2004-737-009	WR	JUAN	Gill et al., 2016	EPMA, TIMS, MC-ICP-MS, FTIR	47.9869	-129.071	50.9356	1.435	9.12446	7.81333	15.0062	12.129	2.54595	0.406351	0.213792	0.168839	0.324	67.8695		17.3308	40.9729	224.002	0.0744328		4.34298	2.6588	1.09201		3.86664	2.24031	0.930109	7.68179		0.349548			12.0762	10.8116	64.6269	0.660485	2.3869	5.57773	43.7657	3.05749		207.885	0.74036	0.682359	0.737388
WFL2004-737-017	WR	JUAN	Gill et al., 2016	EPMA, TIMS, MC-ICP-MS, FTIR	47.9857	-129.084	50.4989	1.6469	9.36416	7.62057	15.1727	11.9968	2.68027	0.402914	0.233238	0.197267	0.382	82.9388		20.5132	40.7787	247.029	0.0858644		4.93809	2.86715	1.28366		4.48973	2.716	1.03478	9.19203		0.382138			13.9579	13.0386	73.3247	N/A	2.83295	7.12071	43.5652	3.68863		195.612	0.847885	0.796321	0.9089
WFL2004-737-015	GL	JUAN	Gill et al., 2016	EPMA, TIMS, MC-ICP-MS, FTIR	47.9854	-129.081	50.7191	1.63122	9.5261	7.80149	14.9291	11.8579	2.64027	0.359621	0.216623	0.201575	0.298	67.9643		19.2758	41.4055	191.954	0.0595282		4.90098	2.94423	1.30122		4.43273	2.68959	1.05722	8.45813		0.396369			12.3068	13.2242	67.4647	0.616998	2.76947	5.98119	39.6187	3.80351		179.461	0.742131	0.793073	0.755848
WFL2004-737-018	WR	JUAN	Gill et al., 2016	XRF , TIMS, MC-ICP-MS	47.985	-129.084	50.3681	1.37223	8.14783	8.11489	16.3808	12.6705	2.41	0.481101	0.199252	0.155257		68.9		18.08		315.3	0.066	73.3	3.92	2.4	1.13	16.1	3.69	2.47	0.85	7.74		0.33			11.6	11.35	98	0.68	2.53	5.4	38.1	3.18		233.9	0.74	0.63	0.69
WFL2004-737-014	WR	JUAN	Gill et al., 2016	XRF XRF	47.985	-129.079	51.0824	1.69759	9.64846	7.09846	15.1068	11.9593	2.70532	0.573763	0.243867	0.184005		86.8				90.8		65.5				17.9									15.3		53.8			7.1	41.6			232.9
TT175-17(12)	GL	JUAN	Gill et al., 2016	EPMA, TIMS, MC-ICP-MS	47.985	-129.085	51.5816	1.17975	9.26	7.99213	15.0655	12.6221	2.22	0.14275	0.1135	0.18075		33		9.992		94.6079	0.03	59.1924	4.668	2.959	1.031	19.7925	3.83	1.88	1.046	3.911		0.421			5.3	8.069	43.0602	0.21	1.577	2.2	45.7	2.765		109	0.442	0.716	0.295
TT175-17(24)	WR/wc	JUAN	Gill et al., 2016	XRF(UM)	47.985	-129.085	51.16	1.205	9.29	8.22	14.72	12.74	2.23	0.15	0.111	0.183		29.8072		9.00905	60.1991	180.519	0.0313246	74	4.48211	2.868	0.972266	15	3.57308	1.75141	0.988263	3.54895		0.389673			4.98729	7.3708	67.3519	0.460325	1.42986	2.48706	45.0945	2.53129		101.326	N/A	0.683365	0.299774
WFL2004-737-019	WR	JUAN	Gill et al., 2016	XRF XRF	47.9848	-129.084	50.9581	1.69241	9.49787	7.2075	15.087	12.2108	2.67244	0.555831	0.23737	0.180691		80.8				175.2		66				17.3									13.8		56.8			7.1	44			229.5
WFL2004-737-024	WR	JUAN	Gill et al., 2016	XRF XRF	47.9842	-129.085	50.5606	1.61713	9.12882	7.78884	15.3486	12.3971	2.6104	0.46361	0.210933	0.173852		85.5				266.6		74.3				17.7									13.4		75			7.5	42			200
WFL2004-737-013	WR	JUAN	Gill et al., 2016	EPMA/ICPMS, TIMS, MC-ICP-MS, FTIR	47.984	-129.076	49.9597	1.42421	9.31049	8.00378	15.5597	12.0937	2.68212	0.205012	0.159698	0.19432	0.228	41.2371		13.0623	42.8201	326.442	0.0435733		4.70674	2.85945	1.15294		4.1283	2.24743	1.01704	5.19725		0.386161			7.15031	10.0076	99.9637	0.490681	2.0195	3.63868	42.2193	3.173		146.799	0.443263	0.741033	0.452714
WFL2004-737-012	WR	JUAN	Gill et al., 2016	XRF XRF	47.9838	-129.075	50.9932	1.70746	9.51484	7.09524	15.1063	12.2058	2.70647	0.550023	0.240127	0.180573		83.9				171.6		67.6				18.6									14.2		56.3			7.5	42.6			229.2
WFL2004-737-025	GL	JUAN	Gill et al., 2016	EPMA, FTIR	47.9831	-129.084	50.4522	1.68733	9.18409	7.3692	15.2177	12.1305	2.63298	0.402704	0.219607	0.187064	0.382	83.8864		21.8215	41.8322	266.175	0.0751053		5.13951	2.95814	1.40284		4.67056	2.87091	1.06092	9.71598		0.416819			14.3966	14.1419	74.7083	0.691831	3.12769	6.908	40.5588	4.01572		198.751	0.857266	0.820462	0.8783
WFL2004-737-026	GL	JUAN	Gill et al., 2016	EPMA, FTIR	47.983	-129.084	50.8307	1.63308	9.50785	7.88551	15.0055	12.0123	2.43646	0.354565	0.207391	0.223444	0.306	67.1635		18.4716	41.4153	171.48	0.0696253		4.90651	2.91768	1.21698		4.35887	2.47981	1.04975	8.32056		0.373813			11.9038	12.0654	67.6633	0.626615	2.64863	5.84649	42.854	3.53675		173.947	0.769759	0.781921	0.73746
WFL2004-737-029	GL	JUAN	Gill et al., 2016	EPMA, TIMS, MC-ICP-MS, FTIR	47.9806	-129.079	49.9154	1.56337	9.13222	8.16519	15.6612	12.1039	2.47657	0.207409	0.15459	0.174769	0.238	41.1122		13.7976	42.4465	315.229	0.0390133		4.7824	2.9098	1.19307		4.19931	2.33357	1.03703	5.52231		0.392292			7.47992	10.416	99.898	0.469204	2.11504	3.62412	41.7285	3.276		147.648	0.462548	0.763125	0.464536
JASII053-2	GL	JUAN	Gill et al., 2016	XRF	47.98	-129.11	51.2912	1.88729	11.1722	6.36933	14.4978	10.8006	2.89186	0.617262	0.270839	0.201542		92		26.696		94.9728	0.09	65.8206	5.818	3.547	1.522	17.1271	5.25	3.31	1.254	11.774		0.489			18.8	16.263	46.7374	0.67	3.648	7.5	42.8	4.459		222	N/A	0.911	N/A
TT175-29(2)	GL	JUAN	Gill et al., 2016	XRF, TIMS, MC-ICP-MS	47.98	-129.088	50.5587	1.3911	9.43274	7.88571	15.1692	12.251	2.44233	0.504581	0.19326	0.17137		71		18.995		290.424	0.07	74.1105	4.42	2.692	1.185	14.5205	3.996	2.32	0.97	8.516		0.37			13.1	11.88	64.6321	0.48	2.626	5.2	43.8	3.32		214	1.08	0.698	0.757
WFL2004-737-030	WR	JUAN	Gill et al., 2016	XRF	47.9794	-129.076	51.1142	1.56181	9.71223	7.39423	15.0022	12.0195	2.58984	0.5086	0.214382	0.182962		75.6671		19.4245	42.5433	112.638	0.0872309	66.6	4.81194	2.90618	1.21829	18	4.22301	2.57689	1.02468	8.58548		0.392668			13.761	12.0161	50.4082	0.737943	2.65818	6.46487	43.692	3.45899		210.301	0.848814	0.75577	0.830146
WFL2004-737-032	WR	JUAN	Gill et al., 2016	XRF XRF	47.9787	-129.078	51.2531	1.57191	9.89438	7.2143	14.9408	11.8849	2.62494	0.514392	0.213573	0.187731		77.3				82.9		63.8				16.6									13.4		44.9			6.3	42.5			211.8
WFL2004-737-033	WR	JUAN	Gill et al., 2016	EPMA, TIMS, MC-ICP-MS, FTIR	47.9783	-129.081	51.4	1.44	9.6	7.76	14.97	12.14	2.22	0.38	0.2	0.19	0.307	63.5857		15.6798	42.448	134.885	0.0675452		4.39927	2.62293	1.0811		3.74941	2.1672	0.938845	6.85649		0.360557			11.2846	9.72419	51.2449	0.620151	2.18568	5.30904	44.1677	2.90017		197.418	0.707597	0.678142	0.676191
WFL2004-737-035	GL	JUAN	Gill et al., 2016	EPMA, TIMS, MC-ICP-MS, FTIR	47.9781	-129.083	50.66	1.4853	10.2655	7.90129	14.6323	11.7836	2.49507	0.179043	0.155574	0.221327	0.184	38.2702		11.8719	44.1831	147.353	0.0378333		5.07128	3.24504	1.12443		4.22331	2.17088	1.12944	4.74528		0.450493			6.30389	9.30693	66.5062	0.413661	1.84353	3.2769	44.9873	3.14655		112.583	0.400541	0.790731	0.405879
WFL2004-737-034	GL	JUAN	Gill et al., 2016	EPMA, TIMS, MC-ICP-MS	47.978	-129.083	50.8043	1.52822	10.2347	7.74776	14.5456	11.7754	2.32953	0.183761	0.164682	0.192052		37.5226		11.7238	44.452	170.068	0.0401939		5.27828	3.26409	1.1541		4.23438	2.22854	1.09853	4.63489		0.462115			6.16194	9.4192	67.2645	0.406108	1.85262	3.17809	41.8151	3.19362		111.53	0.376732	0.746362	0.371918
WFL2011-D264-R004		JUAN	Gill et al., 2016	EPMA, LA	47.9767	-129.083	50.9354	1.398	10.3174	7.91722	14.8414	12.0566	2.368	0.1906	0.1238	0.1906		37.9924		12.0831	36.2413	146.783			5.57183	3.53595	1.36222		4.63169	2.21286	1.11617	5.05904		0.494552			5.68221	9.61207	56.9126	0.460433	1.75222	2.9925	42.5615	3.33351		119.18	0.362024	0.776315	0.398572
WFL2011-D264-R007		JUAN	Gill et al., 2016	EPMA, LA	47.9764	-129.085	50.3638	1.819	10.3974	7.37163	14.9502	11.8842	2.7894	0.3554	0.1868	0.1858		63.3849		20.296	35.4735	135.378			5.78138	3.42701	1.43125		5.75009	3.00821	1.2144	8.41379		0.41421			11.6534	14.6252	49.4692	0.57308	2.97212	5.24524	42.1065	4.12011		193.255	0.733783	0.898917	0.75687
WFL2011-D264-R001		JUAN	Gill et al., 2016	EPMA, LA	47.9761	-129.08	51.3204	1.5702	10.084	7.41397	14.8594	11.398	2.5894	0.4776	0.1768	0.1786		73.2914		20.6288	35.9791	69.3113			5.13384	3.26021	1.27273		4.73732	2.73061	1.12712	9.3747		0.475524			11.5257	14.2592	36.3123	0.621345	2.93327	5.52546	40.8203	3.54813		211.5	0.805934	0.770337	0.849561
WFL2004-737-038	GL	JUAN	Gill et al., 2016	EPMA, TIMS, MC-ICP-MS, FTIR	47.9749	-129.089	49.2535	1.95436	9.70489	7.51676	15.9199	10.7483	2.90489	0.490323	0.310164	0.172477	0.481	97.2064		27.6585	40.0552	226.462	0.101208		5.5647	3.28409	1.50301		5.3116	3.39825	1.17922	12.3194		0.435778			18.6373	16.9577	107.035	0.835393	3.80118	9.14729	36.6642	4.56323		223.631	1.14345	0.915607	1.21376
ALVIN-2931	GL	JUAN	Gill et al., 2016	EPMA	47.974	-129.084	51.5599	1.19097	9.84697	7.63616	15.1562	12.7626	2.2548	0.167996	0.0966018	0.126628		33		10.066		175.425	0.03	76.7341	4.663	2.967	1.038	17.6692	3.816	1.93	1.052	3.925		0.419			5.43	8.253	64.5496	0.31	1.596	2.4	45.8	2.768		110	0.45	0.709	0.29
WFL2004-739-001	WR	JUAN	Gill et al., 2016	XRF XRF	47.9719	-129.09	50.8801	1.73013	9.46936	7.21839	15.0375	11.9141	2.80623	0.519257	0.242921	0.18206		81.7				188.2		65.7				17.3									14.2		63.1			6.7	43.5			232.1
WFL2004-737-040	GL	JUAN	Gill et al., 2016	EPMA, TIMS, MC-ICP-MS, FTIR	47.9716	-129.088	49.8701	1.88152	10.2074	7.29969	14.6098	11.4259	2.87992	0.327546	0.220438	0.21348	0.375	65.0291		20.7205	41.8632	137.426	0.0636981		5.61152	3.33134	1.41625		4.91277	2.98202	1.18667	8.73598		0.448825			12.3596	14.1772	62.215	0.660854	3.00291	5.83133	44.9034	4.06064		190.01	0.762097	0.879667	0.776248
WFL2004-739-002	WR	JUAN	Gill et al., 2016	XRF XRF	47.9711	-129.09	49.571	1.75204	8.65519	8.09349	16.5349	11.6758	2.74759	0.564001	0.243701	0.16233		89.9				256.9		57.5				17.4									14.8		122.2			8.1	35.9			250.4
WFL2004-739-003	WR	JUAN	Gill et al., 2016	EPMA, FTIR	47.9701	-129.091	50.3215	1.46067	9.30381	8.29944	15.7237	12.1003	2.67994	0.201362	0.154159	0.159038	0.214	39.6527		12.9502	42.6354	315.109	0.0389733		4.65205	2.86972	1.12539		4.0139	2.18207	1.00518	5.18836		0.385627			6.98191	9.9079	100.071	N/A	1.98996	3.46322	41.6827	3.078		143.94	0.434028	0.738099	0.447541
JASII053-1	GL	JUAN	Gill et al., 2016	XRF	47.97	-129.056	50.8789	1.6667	9.84012	7.03397	15.1046	11.5374	2.88084	0.636418	0.240468	0.180591		85		23.749		201.431	0.08	67.2028	5.075	3.003	1.351	16.1814	4.675	3	1.077	10.545		0.407			17	14.503	66.248	0.62	3.283	7.4	43.3	3.875		232	N/A	0.81	N/A
WFL2004-739-005	GL	JUAN	Gill et al., 2016	EPMA, TIMS, MC-ICP-MS, FTIR	47.9682	-129.092	50.3439	1.83551	10.3524	7.1871	14.7815	11.708	2.87492	0.319867	0.234839	0.21348	0.376	65.0301		20.7419	41.8256	146.491	0.0630328		5.69308	3.37287	1.40802		4.97784	2.98291	1.21965	8.75584		0.449082			12.3463	14.1606	62.6219	0.803679	3.00099	5.92957	45.3499	4.1497		189.021	0.762724	0.899222	0.774229
WFL2002-465-001	GL-Mn	JUAN	Gill et al., 2016	EPMA, FTIR	47.9678	-129.056	51.4002	1.73158	10.4525	6.67521	14.9976	10.5819	2.76402	0.482355	0.250147	0.206006	0.4	N/A		24.0625		70	0.0895359	57	5.62801	3.32994	1.46352	19	5.28348	3.11079	1.17144	11.3615		0.517419			15.6223	14.9931	39	N/A	3.28678	8.07555	41.813	4.27984		189.166	0.991621	0.883019	N/A
WFL2004-739-007	GL	JUAN	Gill et al., 2016	EPMA, TIMS, MC-ICP-MS, FTIR	47.9669	-129.093	49.7523	1.98451	9.84683	7.39647	16.0345	11.0101	2.88841	0.489027	0.325857	0.168244	0.473	98.7368		28.0549	40.2774	239.289	0.101208		5.64963	3.24759	1.54413		5.36411	3.43075	1.18253	12.4332		0.433173			18.9937	17.0544	108.91	1.0039	3.82338	9.29548	36.9824	4.60839		226.17	1.1608	0.920538	1.21704
TT175-59(1)	WR/wc	JUAN	Gill et al., 2016	XRF(UM)	47.9667	-129.133	51.41	1.712	9.66	7.08	14.79	11.74	2.7	0.49	0.233	0.187		71		22.2		125	0.08	70	5.09	3.05	1.37	18	4.85	2.95	1.08	10.3		0.47			14.8	13.9	47	N/A	3.08	6.2	46.4	4		214	N/A	0.81	0.76
WFL2004-739-008	WR	JUAN	Gill et al., 2016	XRF XRF	47.9662	-129.092	51.4687	2.09638	10.7661	6.30272	14.3667	10.8142	3.05126	0.635105	0.297887	0.201017		87.8				92.4		56.6				18.1									15.1		42.8			8	41.9			218.3
WFL2004-738-025	WR	JUAN	Gill et al., 2016	XRF XRF	47.9658	-129.093	50.9638	1.82321	9.33347	7.12032	14.9625	11.8536	3.05968	0.456603	0.245317	0.181548		66.5				150.7		67.4				17.4									10.8		61.8			5.7	43.8			230.1
WFL2004-738-040	WR	JUAN	Gill et al., 2016	EPMA, TIMS, MC-ICP-MS, FTIR	47.9655	-129.12	50.7591	2.41152	12.2473	6.2091	13.743	10.5869	3.39007	0.163062	0.256772	0.233849	0.325	35.9056		17.4259	43.5006	86.7188	0.0536667		7.70598	4.78959	1.73901		6.54384	3.87347	1.69533	6.08444		0.6497			6.76953	15.2532	47.9444	N/A	2.92979	3.84195	46.9528	5.07348		133.959	0.436395	1.21043	0.484171
WFL2004-739-009	WR	JUAN	Gill et al., 2016	XRF , TIMS, MC-ICP-MS	47.9654	-129.093	51.0286	1.68317	9.4627	7.13324	14.9978	11.9427	2.76426	0.572931	0.23531	0.179346		80.5		19.73		119.8	0.083	66.5	4.42	2.72	1.25	17.2	4.05	2.89	0.97	8.59		0.39			14.8	12.2	54.7	0.82	2.69	7.1	43	3.45		231.5	0.95	0.71	0.86
WFL2004-738-023	GL	JUAN	Gill et al., 2016	EPMA, TIMS, MC-ICP-MS, FTIR	47.9654	-129.091	51.2352	1.2547	9.95529	8.27521	14.665	12.3525	2.30248	0.145997	0.144005	0.222209	0.164	32.4358		9.82317	44.3396	157.701	0.0336262		4.52455	2.93469	1.03283		3.76249	1.98626	1.06374	3.91024		0.431789			5.04532	8.00949	66.9752	0.348073	1.58048	2.74604	45.2062	2.81345		101.43	0.332289	0.673308	0.335829
WFL2004-738-039	WR	JUAN	Gill et al., 2016	EPMA, FTIR	47.9654	-129.12	51.045	2.04557	10.0769	6.70623	14.7653	11.2404	3.28256	0.473306	0.31814	0.209908	0.46	108.827		24.9217	38.9345	99.243	0.111796		5.82578	3.381	1.53072		5.1589	3.32943	1.22058	11.0341		0.452393			16.7773	15.6808	52.2795	1.04145	3.46165	8.94611	43.7404	4.26261		250.23	1.02509	0.916698	1.081
WFL2004-738-038	WR	JUAN	Gill et al., 2016	EPMA, FTIR	47.9652	-129.118	50.7433	1.95356	10.0104	7.0988	14.7554	11.529	3.0518	0.376938	0.268292	0.212157	0.392	62.9138		20.9856	39.4505	142.794	0.0636552		5.76404	3.3607	1.44421		5.0944	3.25871	1.21479	8.68593		0.445031			11.9738	14.1995	58.8605	0.744667	3.06337	5.6451	44.7928	4.087		223.355	0.758141	0.906765	0.734484
WFL2004-738-017	GL	JUAN	Gill et al., 2016	EPMA, TIMS, MC-ICP-MS	47.9643	-129.085	50.686	1.72573	9.79046	7.02865	14.7723	11.5467	2.86396	0.49598	0.284686	0.206337		84.5709		24.2815	41.1476	91.564	0.0800248		5.19594	3.20867	1.41363		4.79193	3.10236	1.06259	10.976		0.428024			16.4419	14.9473	50.3479	0.764222	3.34649	7.03099	40.0754	4.14947		230.206	0.951434	0.824938	0.973611
WFL2004-738-032	GL	JUAN	Gill et al., 2016	EPMA, TIMS, MC-ICP-MS, FTIR	47.9641	-129.107	51.2631	1.86183	11.0256	6.51495	14.4926	10.7811	2.96801	0.536271	0.302964	0.215265	0.492	93.6614		27.2341	42.8809	27.3284	0.0925404		5.8923	3.51917	1.5804		5.31034	3.33334	1.22505	12.3329		0.495099			18.4986	16.8896	33.0048	0.866313	3.78131	7.88428	39.4522	4.4764		230.093	1.093	0.936653	1.0835
WFL2004-739-010	GL	JUAN	Gill et al., 2016	EPMA, TIMS, MC-ICP-MS, FTIR	47.964	-129.092	51.1192	1.35716	10.0335	7.96292	14.6195	12.341	2.35831	0.16559	0.145113	0.195756	0.17	33.1155		10.1077	44.1583	171.936	0.0317542		4.73277	3.00307	1.03357		3.81546	1.93428	1.06094	4.00264		0.420032			5.20463	8.17199	67.4822	0.503405	1.5979	2.80937	45.2847	2.80522		105.492	0.32373	0.717403	0.336859
WFL2004-738-016	WR	JUAN	Gill et al., 2016	XRF XRF	47.9639	-129.083	51.3245	1.81847	10.2674	6.60966	14.6301	11.3332	2.92749	0.635127	0.259184	0.194815		94.1				40.8		57.8				17.6									15.9		40.7			7.9	42.7			234.4
WFL2004-739-012	WR	JUAN	Gill et al., 2016	EPMA, TIMS, MC-ICP-MS, FTIR	47.9639	-129.089	50.4809	1.81739	10.4904	7.09644	14.8195	11.7406	2.84246	0.331654	0.246137	0.171154	0.384	64.7846		20.6269	41.7911	188.481	0.0636414		5.57459	3.34554	1.39807		4.98884	2.97263	1.19038	8.68336		0.451187			12.262	14.0155	67.759	0.865942	2.992	5.83845	45.0546	4.07423		192.562	0.755871	0.893407	0.772892
WFL2004-739-014	GL	JUAN	Gill et al., 2016	EPMA, TIMS, MC-ICP-MS	47.9638	-129.087	51.3179	1.89959	11.1115	6.46842	14.5074	10.7399	2.94812	0.561973	0.300564	0.226442		96		27.52		18	0.093		5.64	3.46	1.51		5.27	3.35	1.23	12.1		0.48			17.8	16.79	33	0.91	3.74	7.67	39	4.56		228	1.08	0.91	1.12
WFL2011-D264-R018		JUAN	Gill et al., 2016	EPMA, LA	47.9629	-129.101	50.8618	1.7458	10.3022	6.8252	14.707	11.2554	2.7824	0.5798	0.2032	0.1874		87.8774		24.7997	33.1696	45.6124			5.59146	3.49549	1.44552		5.51031	3.40334	1.25735	11.5033		0.441773			14.93	15.6271	32.7597	0.748922	3.54748	6.54353	41.1513	4.21245		236.405	0.979873	0.920908	1.0609
WFL2004-739-021	WR	JUAN	Gill et al., 2016	EPMA, TIMS, MC-ICP-MS, FTIR	47.9607	-129.095	50.2255	1.46102	9.09146	8.13316	15.6703	12.1945	2.70807	0.201931	0.156559	0.173006	0.216	40.6636		13.0875	42.2717	344.823	0.0386571		4.68021	2.86489	1.14461		4.07681	2.20184	1.00836	5.24025		0.388229			6.97967	9.89886	97.9785	N/A	2.01371	3.42301	41.4743	3.14831		145.332	0.433562	0.738518	0.442965
WFL2004-740-038	GL	JUAN	Gill et al., 2016	EPMA, TIMS, MC-ICP-MS, FTIR	47.9603	-129.073	51.3958	1.71312	9.78039	7.0879	14.8148	11.3969	2.85159	0.506461	0.275963	0.183587	0.371	85.834		24.5925	41.1703	98.054	0.0856329		5.33013	3.25628	1.45043		4.75596	3.06608	1.10676	10.9344		0.432459			16.7038	15.256	49.5793	0.770959	3.39809	7.07218	38.4205	4.30928		230.611	0.997065	0.846101	0.955745
WFL2004-739-022	WR	JUAN	Gill et al., 2016	EPMA, TIMS, MC-ICP-MS, FTIR	47.9601	-129.095	49.6097	2.07809	10.1467	7.13919	15.6266	10.7302	3.17037	0.48217	0.346719	0.202766	0.492	94.1502		29.3227	39.6534	265.319	0.10174		6.78057	3.96016	1.68205		6.24908	3.94834	1.43172	12.6915		0.547584			18.6503	18.7603	99.4219	1.09608	4.12188	9.23383	38.5099	5.14125		211.928	1.14976	1.08659	1.21673
WFL2004-741-017		JUAN	Gill et al., 2016	EPMA, LA, FTIR	47.9597	-129.104	50.9249	1.94001	9.90764	6.93274	14.6631	11.4524	2.97121	0.391643	0.281855	0.188481	0.385	66.5646		23.9217	40.894	135.142			6.13565	3.71373	1.61791		5.32389	3.74125	1.25233	9.52233		0.515331			12.2353	16.6265	56.4225	0.824553	3.51833	5.7108	42.4405	4.50671		234.798	0.793485	0.943204	0.802452
WFL2004-738-001	GL	JUAN	Gill et al., 2016	EPMA, TIMS, MC-ICP-MS, FTIR	47.9596	-129.064	51.4813	1.95419	10.9331	6.30212	14.2693	10.7157	3.01991	0.554178	0.270563	0.241079	0.47	92.1791		25.924	42.5744	23.4492	0.100851		5.92233	3.52465	1.47694		5.28655	3.19479	1.2543	11.6718		0.477991			17.4602	15.7609	28.6061	0.833384	3.51118	7.83015	42.9455	4.32154		217.491	1.08141	0.920707	1.10012
WFL2004-741-018		JUAN	Gill et al., 2016	EPMA, LA, FTIR	47.9594	-129.102	50.9319	1.86229	9.82555	6.95188	14.7051	11.5014	2.96986	0.37471	0.294379	0.202766	0.379	66.3768		23.8454	41.9319	146.034			6.14101	3.70171	1.6308		5.38099	3.60934	1.24405	9.40974		0.492808			12.1858	16.5041	59.4066	0.833853	3.47861	5.71894	42.6003	4.60713		235.177	0.773708	0.93901	0.803265
WFL2004-740-025	WR	JUAN	Gill et al., 2016	XRF XRF	47.9593	-129.087	51.5597	1.92372	11.0734	6.24884	14.2793	10.8266	2.97978	0.633146	0.268323	0.20716		92.8				23.2		53.8				19.2									16.1		31.7			7	42.8			215.5
WFL2004-741-019	GL	JUAN	Gill et al., 2016	EPMA, TIMS, MC-ICP-MS, FTIR	47.959	-129.101	51.552	2.23963	11.6871	5.80241	14.1435	10.0626	3.01309	0.643083	0.387705	0.231534	0.527	106.809		31.1178	40.6897	58.2765	0.116008		6.84452	4.15968	1.67913		6.16405	3.84269	1.44029	13.9086		0.549792			21.3363	18.916	37.2273	0.953502	4.19109	9.84546	43.2349	4.93401		217.316	1.32501	1.08132	1.36701
WFL2002-465-003	WR	JUAN	Gill et al., 2016	XRF , TIMS, MC-ICP-MS	47.9583	-129.018	51.0504	1.6856	9.39391	7.47814	14.896	11.9308	2.96512	0.251282	0.165846	0.182933		45.658		14.9733		277	0.06	64	5.75676	3.38781	1.43082	16	5.18736	2.83	1.23343	5.74056		0.519237			5.84049	12.112	67	0.6	2.40645	3.71	43.87	4.1201		150.68	0.38	0.896285	0.344224
WFL2004-741-020	WR	JUAN	Gill et al., 2016	XRF/ICPMS, FTIR	47.9582	-129.099	51.2139	1.71853	9.73169	6.99925	14.8371	11.6588	2.83993	0.567845	0.246903	0.186065	0.435	88.4762		23.7576	40.6725	82.9796	0.0949545		5.26469	3.16292	1.34964		4.75149	2.94175	1.12819	10.716		0.417612			16.1341	14.7159	46.2169	N/A	3.31816	7.48495	43.5106	3.78585		231.471	1.00345	0.835337	1.04133
WFL2004-739-024	WR	JUAN	Gill et al., 2016	EPMA, FTIR	47.9581	-129.092	50.1479	1.81129	10.4458	7.11969	14.7092	11.7864	2.92916	0.342872	0.237792	0.190465	0.373	65.2468		20.8091	42.9417	195.559	0.0644267		5.74563	3.34311	1.44136		5.08395	3.02007	1.21234	8.78608		0.453635			12.4326	14.0322	69.2077	0.851888	3.01813	5.79414	45.9691	4.10975		195.99	0.766699	0.906988	0.793938
WFL2004-741-012	GL	JUAN	Gill et al., 2016	EPMA, TIMS, MC-ICP-MS, FTIR	47.9572	-129.113	50.836	1.80425	9.73635	6.8771	14.6068	11.3733	2.99592	0.383243	0.29244	0.185069	0.394	62.1675		22.066	39.5167	146.677	0.0657833		5.86908	3.43734	1.43735		5.19257	3.22381	1.23338	8.98793		0.454855			11.756	14.6571	59.7103	0.981015	3.16115	5.53336	45.1045	4.20275		220.014	0.753272	0.903001	0.732815
WFL2011-D264-R020		JUAN	Gill et al., 2016	EPMA, LA	47.9571	-129.104	50.3704	1.8376	10.53	6.87362	14.6802	11.2072	2.7396	0.554	0.1934	0.1794		86.9666		25.785	33.1978	136.93			5.42836	3.73547	1.69109		5.14878	3.7431	1.21656	11.4883		0.371362			14.5748	15.918	48.4077	0.703116	3.50943	6.60467	41.2632	4.76704		227.062	1.02787	0.871845	1.1192
WFL2004-741-004	GL	JUAN	Gill et al., 2016	EPMA, TIMS, MC-ICP-MS, FTIR	47.9566	-129.118	51.043	1.7915	9.95327	6.91073	14.6068	11.3707	3.11464	0.389832	0.277209	0.220225	0.428	62.864		22.3716	39.7201	152.993	0.0538821		5.95688	3.64517	1.55839		5.20922	3.4149	1.20784	9.42762		0.489102			12.2513	15.6627	57.6271	0.739799	3.34062	5.39031	41.5315	4.61259		226.721	0.758254	0.9096	0.706921
WFL2004-739-034	WR	JUAN	Gill et al., 2016	EPMA, TIMS, MC-ICP-MS, FTIR	47.9552	-129.096	50.9021	1.39899	10.1101	7.80486	14.6746	12.2221	2.39039	0.162746	0.149728	0.171154	0.182	34.89		10.4161	43.6223	168.481	0.0348021		4.72543	3.03846	1.01711		3.87481	1.96871	1.07072	4.13604		0.417742			5.41248	8.34921	65.6334	0.403456	1.64502	2.92393	44.7369	2.84989		108.173	0.339967	0.723582	0.356432
WFL2004-741-021	WR	JUAN	Gill et al., 2016	XRF/ICPMS, FTIR	47.9552	-129.102	51.4768	1.80313	10.1706	6.64426	14.6481	11.2895	2.90986	0.607548	0.258795	0.191381	0.435	90.7387		25.1077	41.4914	41.3323	0.095728	62.2	5.49776	3.26171	1.41459	16.4	5.00153	3.05727	1.1606	11.2143		0.44522			17.0726	15.3409	38.8856	0.857621	3.45685	7.81828	43.4294	4.00094		228.516	1.04843	0.873626	1.07019
WFL2004-739-035	WR	JUAN	Gill et al., 2016	XRF XRF	47.9545	-129.094	50.382	1.79689	9.95905	7.32187	14.9351	11.9484	2.82735	0.42733	0.212763	0.189245		67				193.7		67.4				18.4									11.4		71.4			6.3	42.8			194.8
TT175-21(2)	GL	JUAN	Gill et al., 2016	XRF	47.954	-129.083	51.1373	1.13143	8.43638	7.74804	15.9987	12.6776	2.13214	0.419514	0.162754	0.156046		65		15.304		199.004	0.06	77.3219	3.673	2.264	0.954	16.1454	3.212	1.88	0.806	6.984		0.312			11.5	9.27	68.4041	0.36	2.09	4.5	41.6	2.543		192	0.956	0.568	0.641
TT175-54(3)	WR/wc	JUAN	Gill et al., 2016	XRF(UM)	47.954	-129.115	50.52	2	10.02	7.06	14.85	11.74	2.88	0.5	0.248	0.193		77		24.8		197	0.06	68	5.93	3.37	1.58	19	5.56	3.45	1.21	11.2		0.52			15.4	16.2	62	0.82	3.47	6.9	47.2	4.69		216	N/A	0.95	0.84
ALVIN-2060-118	GL	JUAN	Gill et al., 2016	EPMA	47.9532	-129.102	51.68	1.79126	10.8231	6.00377	14.9549	10.96	2.85459	0.615041	0.258194	0.13605		96		27.297		19.0734	0.09	55.0014	5.811	3.517	1.571	17.329	5.34	3.41	1.246	12.141		0.487			19.3	16.683	31.1758	0.745	3.738	7.8	41.6	4.478		229	N/A	0.914	N/A
WFL2002-466-003	WR	JUAN	Gill et al., 2016	XRF , TIMS, MC-ICP-MS	47.9499	-129.143	50.4861	1.62094	9.33194	7.74314	15.4762	12.2022	2.571	0.220946	0.169726	0.177761		29.53		14.5034		307	0.08	62	5.58327	3.30406	1.32027	17	4.9366	2.76	1.1655	5.57257		0.501635			6	11.5528	78	0.47	2.32347	3.45	42.17	3.82716		142.16	0.39	0.863265	0.32
WFL2004-740-016	WR	JUAN	Gill et al., 2016	XRF, TIMS, MC-ICP-MS	47.9496	-129.081	51.2589	1.72125	9.61275	7.0449	14.7861	11.8331	2.78758	0.527401	0.244566	0.18335		80.8553		23.4967	40.4919	173.595	0.0876741	67	5.31335	3.13055	1.37643	18.6	4.6876	2.94959	1.12488	10.193		0.411605			15.5155	14.453	53.1522	N/A	3.21545	7.04227	44.5923	3.96068		227.841	0.95956	0.829889	0.953557
WFL2004-740-009	WR	JUAN	Gill et al., 2016	EPMA, FTIR	47.9494	-129.076	50.8204	1.85028	9.99605	6.85762	14.57	11.3724	2.87328	0.488237	0.239586	0.231732	0.359	80.0215		23.3067	40.4173	166.642	0.092265		5.18377	3.04127	1.31238		4.45545	2.84291	1.08926	10.2849		0.403537			15.1397	14.1686	56.1204	0.766493	3.15301	6.96041	44.9546	3.93973		227.011	0.942206	0.823541	0.943357
WFL2002-469-013	WR	JUAN	Gill et al., 2016	EPMA, FTIR	47.9487	-129.098	50.8178	1.84076	9.64543	7.10878	15.0898	11.3998	2.84851	0.436616	0.266752	0.201446	0.413	71.5863		24.1197		204	0.08	66	5.53025	3.20584	1.53785	17	5.30773	3.2725	1.15275	10.5514		0.483598			13.0159	15.5479	60	0.797026	3.3864	5.03786	44.4424	4.44855		245.784	0.856239	0.882553	0.676661
WFL2002-469-012	WR	JUAN	Gill et al., 2016	EPMA/XRF, FTIR	47.9487	-129.098	50.4224	1.92402	10.594	6.94653	14.8541	11.3986	2.78275	0.348783	0.240012	0.226843	0.371	68				187		72				20									13		61			6	39			197
WFL2002-469-011	GL	JUAN	Gill et al., 2016	EPMA , TIMS, MC-ICP-MS, FTIR	47.9487	-129.098	50.2675	1.91096	10.5603	6.93552	15.0013	11.3818	2.77478	0.346232	0.226858	0.200738	0.376	64.3184		21.1585		191	0.059736	70	5.58257	3.30496	1.46541	20	5.20785	3.05972	1.14964	9.44108		0.489821			12.2854	14.3055	62	0.814051	3.04395	5.54804	44.0854	4.22605		199.003	0.795548	0.875418	0.691234
WFL2002-469-015	WR	JUAN	Gill et al., 2016	XRF	47.9486	-129.098	50.4171	1.8124	9.96267	7.32608	14.9541	11.9351	2.77747	0.412595	0.22	0.186171		64.902		20.4905	57.0284	194.339	0.0657067	61	5.63678	3.28115	1.40686	21	5.07583	2.96524	1.18596	8.74363		0.440839			12.331	13.9987	68.963	0.788763	2.9653	5.82033	45.1565	4.10728		194.2	0.76	0.894628	0.779586
WFL2002-469-016	GL	JUAN	Gill et al., 2016	EPMA, FTIR	47.9486	-129.098	50.473	1.96	10.46	7.01	14.98	11.59	2.74	0.34	0.24	0.21	0.383	64.6921		21.3394		191	0.0602795	67	5.6419	3.31465	1.48603	20	5.23365	3.14005	1.16178	9.52056		0.497506			12.3115	14.3351	61	N/A	3.06342	5.59557	45.186	4.27089		200.353	0.791658	0.884108	0.68145
WFL2002-469-014	WR	JUAN	Gill et al., 2016	XRF	47.9485	-129.098	50.4253	1.81158	9.93861	7.32255	14.9661	11.9167	2.80865	0.411267	0.212655	0.186575		63.4593		21.0049		188	0.06	66	5.4641	3.21044	1.42217	16	5.05075	2.95319	1.12854	9.22384		0.489255			12.0392	13.8483	62	0.685705	2.98872	5.77672	46.039	4.21368		195.152	0.759808	0.85833	0.634953
WFL2004-740-007	WR	JUAN	Gill et al., 2016	XRF XRF	47.9484	-129.077	51.1309	1.69379	9.48071	7.22747	14.8519	11.9446	2.73567	0.514895	0.238175	0.181885		78.4				175.3		65.9				17.4									14.2		56.4			7.3	43.8			227.2
WFL2002-468-001	WR	JUAN	Gill et al., 2016	XRF	47.9484	-129.098	50.0864	1.78527	10.4673	7.31788	14.9731	11.7737	2.76201	0.433037	0.21338	0.187992		62.5268		21.1758		195.888	0.0625153	68.0764	5.60246	3.33186	1.47678	18.0205	5.3246	3.04682	1.16478	9.34234		0.506646			12.2876	14.2574	67.1414	0.629269	3.05592	5.64298	46.8959	4.38262		199.22	0.787338	0.887709	0.644157
WFL2002-469-019	WR	JUAN	Gill et al., 2016	XRF	47.9483	-129.098	50.079	1.77803	10.4937	7.35439	14.9283	11.7509	2.69961	0.515257	0.212584	0.188193		62.5628		20.847		196.989	0.066783	68.5062	5.52187	3.23127	1.47622	16.8284	5.186	3.07433	1.14859	9.18812		0.493322			12.1504	14.154	67.6916	0.660269	2.99407	6.45893	45.9461	4.35335		197.589	0.781211	0.883037	0.644732
WFL2002-469-018	GL-Mn	JUAN	Gill et al., 2016	EPMA, FTIR	47.9483	-129.098	50.3772	2.00708	10.4346	6.92568	14.4316	11.7602	2.75785	0.359899	0.237748	0.220553	0.369	63.3042		21.0503		191	0.0622401	N/A	5.59853	3.24887	1.52301	16	5.24892	3.13761	1.14927	9.31463		0.496353			12.3562	14.3181	N/A	N/A	3.03464	5.5156	46.1716	4.36421		197.535	0.791844	0.881806	0.668295
WFL2002-469-017	GL-Mn	JUAN	Gill et al., 2016	EPMA , TIMS, MC-ICP-MS, FTIR	47.9483	-129.098	50.3346	1.81382	10.2967	7.12769	14.8339	11.8043	2.76143	0.336938	0.237209	0.199323	0.364	62.8078		21.1359		198	0.0576137	82	5.68609	3.31687	1.43952	20	5.23917	3.12019	1.17783	9.33817		0.499037			12.3543	14.3807	71	0.655921	3.07822	5.60051	46.9095	4.38967		198.257	0.792696	0.895476	0.661273
WFL2002-469-009	WR	JUAN	Gill et al., 2016	XRF	47.9481	-129.098	50.5019	1.81209	9.84366	7.28046	14.952	11.9235	2.94828	0.340958	0.211595	0.185521		64.76		21.6471		188	0.06	68	5.58885	3.24121	1.49092	19	5.25421	3.02	1.16161	9.39552		0.491947			12.08	14.3234	65	0.68	3.08034	4.52	45.61	4.29183		202.62	0.78	0.884412	0.65
WFL2002-469-010	GL	JUAN	Gill et al., 2016	EPMA, FTIR	47.9481	-129.098	50.3206	1.83668	10.5258	6.90075	14.8606	11.3515	2.82128	0.359899	0.246194	0.205515	0.385	61.8329		20.1692		197	0.0512843	70	5.77475	3.4478	1.47761	19	5.30326	3.08385	1.20562	9.18609		0.518246			10.938	14.3185	57	N/A	3.00167	4.90828	45.0438	4.29161		188.48	0.715655	0.90387	0.639652
WFL2004-739-041	GL	JUAN	Gill et al., 2016	EPMA, TIMS, MC-ICP-MS, FTIR	47.9481	-129.095	50.1683	1.90993	10.3353	7.11993	14.7907	11.6623	2.84558	0.347086	0.258962	0.214979	0.348	68.3523		21.9657	43.2432	183.624	0.06936		5.84673	3.44753	1.45648		5.3068	3.11232	1.23307	9.32554		0.4716			13.1307	14.7649	70.0634	0.873606	3.17386	6.28488	46.1229	4.20847		201.566	0.799981	0.946881	0.831522
WFL2002-469-021	GL-Mn	JUAN	Gill et al., 2016	EPMA, FTIR	47.9481	-129.097	50.2568	1.88219	10.5085	6.94487	14.786	11.8783	2.77817	0.355161	0.258989	0.245714	0.393	63.3218		21.2032		190	0.0582233	70	5.61708	3.22241	1.45727	16	5.15979	3.01229	1.14396	9.39618		0.4863			12.4398	14.3473	64	0.639129	3.09163	5.6017	47.5558	4.32224		196.566	0.785804	0.875984	0.653928
WFL2002-469-022	GL-Mn	JUAN	Gill et al., 2016	EPMA , TIMS, MC-ICP-MS, FTIR	47.948	-129.097	50.8538	1.6773	9.89864	7.13059	14.977	11.7676	2.71221	0.481809	0.26438	0.218489	0.429	81.652		24.0409		113	0.0758018	67	5.08489	2.95414	1.39716	17	4.80921	2.97317	1.05086	11.4554		0.445138			15.7246	14.7193	48	N/A	3.27114	6.75784	44.5624	4.10172		231.434	0.999115	0.806534	0.846142
ALVIN-2450-1	GL	JUAN	Gill et al., 2016	XRF	47.948	-129.098	50.2247	1.79532	10.241	7.3131	15.018	11.7951	2.78436	0.424803	0.215021	0.188541		65		21.066		198.836	0.06	68.9349	5.593	3.368	1.459	18.1552	5.121	3.04	1.21	8.783		0.466			12.945	14.407	66.048	0.63	3.065	5.1	45.1	4.171		197	1.08	0.894	0.72
WFL2002-469-023	WR	JUAN	Gill et al., 2016	EPMA, FTIR	47.9479	-129.096	50.1996	2.15682	11.1037	6.26615	14.6518	10.8912	2.95492	0.533379	0.32821	0.213476	0.5	89.6721		25.5572		69	0.152546	53	5.435	3.11804	1.44925	18	5.23565	3.22858	1.12692	11.7925		0.465587			16.7656	16.1227	34	0.907696	3.57062	7.98141	37.3343	4.56408		176.516	1.05434	0.865584	0.891433
WFL2004-740-002	WR	JUAN	Gill et al., 2016	XRF XRF	47.9478	-129.076	51.058	1.69874	9.41151	7.18835	14.8862	12.0027	2.77984	0.551986	0.239188	0.183571		76.4				171.3		66.2				15.9									14.1		57.8			6.4	43.6			229.6
WFL2002-469-024	GL-Mn	JUAN	Gill et al., 2016	EPMA , TIMS, MC-ICP-MS, FTIR	47.9478	-129.096	50.1794	2.20529	11.0824	6.27363	14.4741	10.8052	2.99517	0.52281	0.322119	0.221968	0.515	N/A		30.7978		71	0.102016	60	6.52936	3.79343	1.80899	22	6.35431	3.93112	1.34014	14.4916		0.556964			N/A	19.4037	36	N/A	4.30157	9.39394	42.6166	5.47578		216.501	1.28037	1.04989	N/A
WFL2004-739-043	GL	JUAN	Gill et al., 2016	EPMA, FTIR	47.9469	-129.095	50.2772	2.29621	11.108	6.29411	14.5087	10.7244	3.11413	0.525685	0.334257	0.21251	0.516	105.586		30.0809	40.8252	59.8651	0.112539		6.66363	3.93602	1.71788		6.10684	3.82049	1.41673	13.1848		0.513443			20.1569	18.7623	42.7007	0.934269	4.16985	9.75082	42.888	5.09818		206.003	1.25348	1.07414	1.28596
WFL2002-471-024	GL	JUAN	Gill et al., 2016	EPMA	47.9302	-129.1	50.9615	1.68444	9.5943	7.22533	14.8688	11.555	3.00813	0.380308	0.259204	0.213476		63.5647		22.0833		152	0.0578394	58	5.38581	3.20436	1.44729	16	5.05679	3.1655	1.11022	9.84099		0.486336			11.9414	14.5466	54	0.986983	3.14017	5.27708	45.2791	4.18175		237.669	0.766613	0.853804	0.650874
WFL2002-471-023	GL	JUAN	Gill et al., 2016	EPMA, TIMS, MC-ICP-MS, FTIR	47.9293	-129.1	50.9565	1.64765	9.62704	7.15324	14.8576	11.6328	2.97266	0.371971	0.256832	0.196669	0.374	60.6916		21.0324		167	0.0528468	68	5.17857	3.10383	1.40496	17	4.7993	3.10937	1.07374	9.29498		0.467365			11.1831	13.8137	58	0.819506	2.99514	4.95821	44.8504	4.04241		228.263	0.711511	0.822937	0.627683
WFL2002-471-022	GL	JUAN	Gill et al., 2016	EPMA	47.9286	-129.099	50.8946	1.71403	9.51064	7.39464	14.654	11.6517	2.92344	0.364637	0.234621	0.203451		90.7897		24.6855		183	0.0817761	65	5.47924	3.22373	1.49973	17	5.14205	3.33853	1.12879	11.361		0.489269			14.9361	15.3776	61	1.02878	3.42211	7.80455	43.6089	4.38028		251.935	0.942201	0.862875	0.851547
WFL2002-471-021	GL	JUAN	Gill et al., 2016	EPMA	47.928	-129.099	50.5895	1.9932	9.79699	6.81315	14.8762	11.1896	3.29088	0.478574	0.316781	0.22645		99.236		24.934		121	0.093	63	5.448	3.236	1.482	20	5.099	3.269	1.165	10.836		0.45			17.012	15.679	51	0.902	3.49	7.584	40.336	4.192		239.873	1.431	0.876	N/A
WFL2002-471-020	GL	JUAN	Gill et al., 2016	EPMA, TIMS, MC-ICP-MS	47.927	-129.098	50.3917	1.80137	9.59713	7.15885	14.8385	11.5297	3.03722	0.385957	0.267129	0.204984		69.5408		23.3955		206	0.0672575	68	5.38332	3.14184	1.47721	16	5.09241	3.30246	1.10827	10.426		0.473203			13.1237	15.0499	55	0.815254	3.31358	6.05578	44.6543	4.33715		244.189	0.840357	0.857545	0.719514
WFL2002-471-017	GL	JUAN	Gill et al., 2016	EPMA, TIMS, MC-ICP-MS, FTIR	47.9262	-129.098	50.6145	1.70852	9.5165	7.39631	14.8499	11.7713	2.86087	0.366094	0.2364	0.209702	0.377	69.0102		21.9753		177	0.0619426	62	5.07158	3.0253	1.38666	16	4.77117	3.0694	1.05559	9.97468		0.463608			12.6637	13.9472	58	1.02869	3.08083	5.60104	43.5771	4.03572		231.222	0.822932	0.809997	0.698888
WFL2002-471-018	GL	JUAN	Gill et al., 2016	EPMA	47.9261	-129.098	50.642	1.8228	9.69352	7.17235	15.0411	11.6131	3.0693	0.376527	0.269016	0.221732		64.0224		22.7622		146	0.0680884	71	5.58136	3.30673	1.50986	19	5.19774	3.34798	1.14559	10.0063		0.497909			12.096	15.0238	52	0.96484	3.28298	5.45386	43.696	4.42521		236.721	0.789047	0.880826	0.672303
WFL2002-471-019	GL	JUAN	Gill et al., 2016	EPMA	47.926	-129.097	50.8426	1.65893	9.97482	7.03378	14.7221	11.3708	2.86067	0.525042	0.26783	0.20463		85.074		24.074		84	0.076	60	4.989	3.032	1.389	19	4.648	2.935	1.098	10.666		0.423			17.072	14.801	40	0.788	3.284	6.782	42.124	4.019		230.821	1.434	0.811	0.943
WFL2002-471-015	GL	JUAN	Gill et al., 2016	EPMA, FTIR	47.9258	-129.1	50.7563	1.75893	9.96438	7.11273	14.7397	11.5602	2.71361	0.428416	0.246643	0.200502	0.391	70.3364		21.8591		136	0.0657674	67	4.92016	2.91958	1.32464	17	4.59968	2.89525	1.03105	10.0429		0.455668			13.4152	13.5871	48	N/A	3.00508	5.92098	43.002	3.89392		209.892	0.883092	0.775887	0.752891
WFL2002-471-014	GL	JUAN	Gill et al., 2016	EPMA, TIMS, MC-ICP-MS, FTIR	47.9257	-129.102	50.6754	1.7575	10.0708	7.12395	14.8094	11.5173	2.75825	0.428781	0.242815	0.220847	0.397	71.7582		21.9873		132	0.0718426	61	5.01503	2.97744	1.33442	17	4.6878	2.93817	1.03306	10.1443		0.460806			13.6312	13.6939	46	0.791304	3.05211	6.07346	44.3907	3.9338		212.097	0.884874	0.795356	0.761625
WFL2002-471-013	GL-Mn	JUAN	Gill et al., 2016	EPMA, FTIR	47.9252	-129.103	50.8155	1.70913	9.93895	7.03274	14.7429	11.5218	2.7969	0.499758	0.260498	0.217486	0.446	95.8691		24.6651		85	0.0943295	68	5.02338	2.96159	1.392	17	4.82572	3.01805	1.04542	11.9553		0.467775			15.9131	14.7773	43	N/A	3.3564	7.14389	42.2824	4.11566		239.137	1.02451	0.804126	0.907361
WFL2002-471-012	GL	JUAN	Gill et al., 2016	EPMA, FTIR	47.9246	-129.104	50.925	1.7026	9.93461	6.95421	15.0207	11.5676	2.69289	0.520031	0.256347	0.198851	0.421	83.5381		24.2069		81	0.076979	64	5.02902	2.97341	1.41191	18	4.82946	2.98208	1.04156	11.4367		0.44273			16.1992	14.7397	41	0.94246	3.25573	6.93316	43.6561	4.04563		233.157	1.0318	0.803086	0.894594
WFL2002-471-011	GL	JUAN	Gill et al., 2016	EPMA, FTIR	47.9245	-129.105	50.6191	1.65658	9.98634	7.09382	14.8772	11.6498	2.73533	0.444088	0.242815	0.212002	0.384	72.0627		22.1432		128	0.0637872	65	5.18046	3.01745	1.36947	20	4.76638	2.91727	1.06539	10.2335		0.462175			14.1208	13.9635	45	0.889362	3.04453	6.02097	45.4428	3.93916		216.02	0.897112	0.80496	0.749661
JASII052-2	GL	JUAN	Gill et al., 2016	XRF	47.9244	-129.109	50.4716	1.95224	9.85419	6.91627	15.1858	11.5298	3.06158	0.568485	0.282401	0.177565		85.5064		27.0799		246.612	0.0927971	70.8838	5.75288	3.32669	1.64427	16.9615	5.49064	3.61124	1.17044	12.1835		0.490322			15.9747	17.2404	57.9753	N/A	3.76772	6.4899	45.0836	4.86008		253.766	1.03195	0.928036	0.846073
JASII054-1	WR	JUAN	Gill et al., 2016	XRF	47.924	-129.108	49.8882	1.89455	10.4079	7.19279	15.1273	11.6073	3.01479	0.442889	0.236281	0.188008		75		23.758		N/A	0.07	56.335	5.837	3.451	1.547	18.3975	5.362	3.33	1.259	10.052		0.484			15.1	15.798	N/A	0.63	3.402	5.5	45.1	4.524		212	N/A	0.93	N/A
WFL2002-471-010	GL	JUAN	Gill et al., 2016	EPMA, FTIR	47.9236	-129.105	50.76	1.66913	10.059	7.07429	14.9378	11.6082	2.73872	0.434794	0.24605	0.245321	0.391	70.9197		21.9647		132	0.061098	64	5.07367	2.98866	1.38017	17	4.69876	2.90076	1.05	10.1224		0.454354			13.8935	13.6975	46	0.933067	3.01832	5.91195	45.7057	3.92194		213.315	0.903928	0.800032	0.752695
WFL2002-471-005	GL-Mn	JUAN	Gill et al., 2016	EPMA, FTIR	47.9236	-129.108	50.0602	1.93729	10.4101	6.8306	14.9229	11.8101	2.80368	0.370832	0.238934	0.19319	0.41	87.1717		23.2843		195	0.072788	70	5.75825	3.33641	1.54853	18	5.39918	3.32498	1.18431	10.5084		0.495734			13.9736	15.4767	61	N/A	3.31997	6.38451	46.4202	4.54798		214.864	0.888215	0.911746	0.79205
WFL2002-471-009	GL	JUAN	Gill et al., 2016	EPMA, FTIR	47.9234	-129.106	50.8841	1.64811	10.1701	7.23135	14.9538	11.6851	2.65104	0.426594	0.237748	0.222911	0.371	67.1878		20.9366		132	0.0594334	65	5.04398	2.95356	1.33513	20	4.68019	2.76184	1.03934	9.6421		0.449294			13.0435	13.205	49	0.808402	2.89566	5.61533	45.3276	3.83146		208.401	0.826904	0.795924	0.707222
WFL2002-471-006	GL	JUAN	Gill et al., 2016	EPMA, FTIR	47.9232	-129.108	49.8719	1.93912	10.3756	6.93822	14.9573	11.7503	2.87103	0.383771	0.243408	0.199795	0.421	71.6944		22.9573		193	0.0661376	61	5.49572	3.17848	1.45334	16	5.19255	3.22751	1.1399	10.3194		0.488318			13.6248	15.0086	59	N/A	3.24869	6.40344	43.4427	4.32649		205.796	0.876402	0.878127	0.789748
WFL2002-467-006	GL	JUAN	Gill et al., 2016	EPMA	47.9231	-129.107	50.1696	2.00382	10.4948	6.87375	15.2852	11.3588	2.86728	0.383588	0.255718	0.188708		72.5977		23.5328		193	0.0726253	64	5.76039	3.32596	1.5477	19	5.4077	3.26762	1.18477	10.6413		0.503113			13.8051	15.4833	60	N/A	3.33398	6.35325	44.2768	4.55872		209.52	0.884397	0.901961	0.800702
WFL2002-467-007	GL-Mn	JUAN	Gill et al., 2016	EPMA/XRF	47.9229	-129.107	50.0885	1.98463	10.5023	6.92077	14.9044	11.218	2.83307	0.404544	0.270903	0.220553		92				199		N/A				16									16.8		75			7	40			213
WFL2002-471-007	GL	JUAN	Gill et al., 2016	EPMA, TIMS, MC-ICP-MS, FTIR	47.9228	-129.107	49.9301	2.01606	10.5271	6.82728	14.9942	11.6975	2.88817	0.404362	0.253382	0.214361	0.438	77.2402		24.1655		196	0.0723683	63	5.76039	3.32871	1.56142	17	5.41257	3.36381	1.17282	10.9873		0.506289			14.6291	15.7138	55	N/A	3.41863	6.72682	45.2879	4.54728		212.484	0.933554	0.927526	0.831593
WFL2002-471-008	GL	JUAN	Gill et al., 2016	EPMA, TIMS, MC-ICP-MS, FTIR	47.9224	-129.106	50.7593	1.70872	10.0041	6.98974	15.0635	11.6733	2.73035	0.51789	0.269825	0.185406	0.436	93.9		24.303		80	0.081	57	5.11639	2.97159	1.39227	19	4.82647	2.99	1.04159	11.484		0.454248			16.4512	14.6469	40	0.858215	3.26023	6.99	44.7	4.06471		236	1.02492	0.802712	0.894
A4245-1918	GL	JUAN	Gill et al., 2016	EPMA, TIMS, MC-ICP-MS	47.9006	-129.129	50.65	1.92	10.89	7.25398	14.4288	11.6253	2.73	0.24	0.265263	0.2		42.4612		19.5698	42.6407	238.88	0.0488953		6.89947	4.41889	1.55493		5.96909	3.80996	1.45427	7.54752		0.628687			8.945	15.4513	63.5628	0.586358	3.04103	4.18924	41.3358	4.82268		145.026	0.572815	1.08427	0.578391
A4245-1704	GL	JUAN	Gill et al., 2016	EPMA, TIMS, MC-ICP-MS	47.8959	-129.13	50.08	1.4	9.56811	8.14261	14.6966	12.7747	2.42	0.184	0.176842	0.18		31.5653		12.7687	42.8338	340.076	0.0655515		4.65769	2.97305	1.15427		4.02921	2.33617	0.997454	4.8728		0.401662			6.05625	9.86895	80.9402	0.422303	1.986	2.91968	41.407	3.17364		140.379	0.379772	0.72564	0.374774
THO0040-015	GL	JUAN8	VAN WAGONER, 1991	ICP-MS	47.008	-129.3	49.9803	2.18088	12.435	6.87279	13.4454	11.2446	2.80114	0.160065		0.250101		19		14.21					7.7	4.9	1.56		5.48	3.7	1.67	4.79	6.8	0.75			3.3	13.23			2.44	1.9	39	4.52		97		1.14	0.29
THO0040-017	GL	JUAN8	VAN WAGONER, 1991	ICP-MS	47.008	-129.3	50.5132	1.71079	11.5953	7.45342	13.6563	11.7654	2.48114	0.100046		0.220101				10.81					6.28	4.34	1.28		4.6	3.1	1.37	3.55	5.6	0.6			2.3	10.29			1.89		39	3.7		80		0.91	0.25
ALV2257-001	GL	JUAN8	Sun et al., 2003	LA-ICP-MS	46.91	-129.26												29.3		13.9			0.034	65	6.4	4.08	1.38		5.22	2.74	1.39	4.88		0.62		0.53	5.28	10.7		0.579	2.19	3.01	45.3	3.84		105	0.336	0.93	0.33
ALV2257-003	GL	JUAN8	Sun et al., 2003	LA-ICP-MS	46.91	-129.26												25.7		14.2			0.032	63.6	7.21	4.64	1.5		5.8	2.91	1.53	4.82		0.67		0.56	4.87	11.3		0.602	2.23	2.72	46.4	4.16		92.7	0.305	1.02	0.31
ALV1415-001-B2-A	GL	JUAN8	Gale, 2013	ICP-MS	46.88	-129.28	50.1256	1.83821	11.7674	7.3169	14.3275	11.1147	2.48213	0.179813	0.159833			27.29	0.74	13.439	43.3	204	0.03005	62.3	6.543	4.21872	1.36	17.41	5.28147	2.973	1.42	4.974		0.605			5.435	11.835	78.5	0.517	2.239	2.359	44	3.984		110.176	0.364	0.995	0.348
ALV1415-B005-002	GL	JUAN8	Gale, 2013	ICP-MS	46.88	-129.28												12.505	0.6	10.111	46.2	208	0.01396	73.1	6.293	4.08327	1.28	17.7	5.00061	2.648	1.386	3.364		0.594			3.156	9.796	74.7	0.371	1.782	1.211	46.5	3.575		92.823	0.208	0.956	0.195
WFL2006-1009-R010	GL	JUAN	CLAGUE, 2013; DREYER, 2013	EMP; LA-ICPMS	45.9942	-129.993	49.89	1.55	10.77	7.45	14.53	12.3	2.65	0.16	0.13	0.19		28.2		12.68	39.8	279.9	0.015		5.12	3.15	1.24		4.38	2.28	1.08	4.52		0.45			4.49	10.18	44.1	0.53	2.03	2.49	48.3	3.13		150.1	0.29	0.76	0.3
WFL2006-1009-R013	GL	JUAN	CLAGUE, 2013; DREYER, 2013	EMP; LA-ICPMS	45.9937	-129.994	49.76	1.39	10.41	7.42	14.85	12.36	2.58	0.15	0.12	0.19		29		10.04	39.9	320.9	0.006		4.73	2.95	1.11		3.87	2.07	1	3.47		0.43			3.19	8.72	73.4	0.38	1.69	1.73	44.8	2.94		143.8	0.19	0.69	0.21
WFL2009-D70-R006	GL	JUAN	CLAGUE, 2013; DREYER, 2013	EMP; LA-ICPMS	45.9927	-130.01	50.07	1.56	11.13	7.3	14.56	12.4	2.73	0.17	0.15	0.21		28.6		13.54	39.6	205.4	0.018		5.53	3.32	1.36		4.68	2.64	1.2	4.97		0.31			4.87	11.15	36	0.45	2.09	2.26	49.6	3.58		156	0.31	0.82	0.33
WFL2009-D70-R005	GL	JUAN	CLAGUE, 2013; DREYER, 2013	EMP; LA-ICPMS	45.9919	-130.008	50.15	1.52	11	7.58	14.58	12.3	2.69	0.18	0.14	0.2		27.9		12.65	37.6	275.5	0.016		5.4	3.28	1.3		4.67	2.34	1.13	4.79		0.29			4.57	10.66	38.9	0.48	2.08	2.22	50.1	3.59		150.8	0.29	0.81	0.32
WFL2005-883-R001	GL	JUAN	CLAGUE, 2013; DREYER, 2013	EMP; ICPMS; LA-ICPMS; MC-ICP-MS	45.9916	-130.018	49.75	1.51	11	7.51	14.66	12.43	2.72	0.17	0.14	0.2		28.1		12.68	48.9	291.2	0.021		5.2	3.31	1.34		4.46	2.47	1.11	4.78		0.46			5	10.73	51.6	0.44	2.03	2.33	48.3	3.5		153.4	0.3	0.83	0.31
WFL2006-1009-R014	GL	JUAN	DREYER, 2013	LA-ICPMS	45.9915	-129.997												19.5		9.96	38.5	316.5	0.009		4.65	2.89	1.14		3.92	2.05	0.99	3.45		0.43			3.08	8.73	66.5	0.36	1.62	1.62	43.8	2.8		141.3	0.2	0.68	0.21
WFL2009-D70-R003	WR	JUAN	DREYER, 2013	ICPMS; XRF	45.9908	-130.008	49.4	1.5	11.07	7.6	14.74	12.25	2.73	0.16	0.13	0.19		24.85		11.96		296.4	0.02	96.7	5.65	3.3	1.34	16.4	4.61	2.47	1.21	4.36		0.45			3.9	10.01	54.3	0.44	1.92	1.74	48.48	3.5		148.04	0.26	0.86	0.32
WFL2009-D70-R002	WR	JUAN	DREYER, 2013	ICPMS; XRF	45.9906	-130.008	49.15	1.52	11.43	7.32	14.35	12.16	2.7	0.26	0.13	0.2		25.82		12.09		192.7	0.02	92	5.8	3.38	1.38	16.7	4.67	2.47	1.25	4.4		0.47			3.99	10.12	49	0.45	1.96	3.23	49.6	3.52		146.07	0.28	0.87	0.29
WFL2009-D70-R001	GL	JUAN	CLAGUE, 2013; DREYER, 2013	EMP; LA-ICPMS	45.9905	-130.009	49.91	1.55	11.01	7.58	14.74	12.52	2.73	0.18	0.15	0.19		29.1		12.73	37.6	292.5	0.02		5.42	3.12	1.29		4.58	2.58	1.14	4.7		0.3			4.66	10.59	44.1	0.53	2.05	2.31	48.7	3.58		158.6	0.3	0.84	0.33
WFL2009-D70-R008	GL	JUAN	CLAGUE, 2013; DREYER, 2013	EMP; LA-ICPMS	45.9874	-130.001	49.94	1.46	10.83	7.6	15.08	12.48	2.66	0.16	0.15	0.18		26		12.35	38.9	276.7	0.017		4.98	3.29	1.24		4.22	2.43	1.13	4.48		0.29			4.38	9.98	44.7	0.44	1.98	2.13	48.4	3.23		151.5	0.29	0.78	0.3
WFL2006-1010-R005	GL	JUAN	CLAGUE, 2013; DREYER, 2013	EMP; ICPMS; LA-ICPMS; MC-ICP-MS	45.9864	-129.995	49.23	1.33	9.97	8.35	15.77	12.28	2.6	0.11	0.1	0.17		19.6		9.9	49.6	319.1	0.022		4.57	2.96	1.13		3.95	2.09	1.01	3.44		0.41			3.33	9	82.4	0.41	1.61	1.72	43.1	3		140.3	0.21	0.73	0.21
WFL2006-1010-R002	GL	JUAN	CLAGUE, 2013; DREYER, 2013	EMP; ICPMS; LA-ICPMS; MC-ICP-MS	45.9822	-130.001	49.68	1.46	10.69	7.46	15	12.35	2.56	0.15	0.12	0.19		26.2		12.11	48.9	276.1	0.024		4.83	3.04	1.21		4.4	2.35	1.07	4.52		0.44			4.61	10.13	50.4	0.39	1.93	2.25	47	3.3		148.4	0.28	0.77	0.28
WFL2006-1010-R001	GL	JUAN	CLAGUE, 2013; DREYER, 2013	EMP; ICPMS; LA-ICPMS; MC-ICP-MS	45.9808	-130.003	49.76	1.44	10.96	7.27	14.71	12.35	2.65	0.17	0.13	0.19		28.1		12.78	48.4	292	0.025		5.27	3.21	1.27		4.53	2.51	1.12	4.71		0.45			5.1	10.61	53.3	0.53	2.05	2.39	48.2	3.48		154.3	0.3	0.82	0.3
WFL2009-D70-R009	WR	JUAN	DREYER, 2013	ICPMS; XRF	45.9779	-130.038	49.32	1.64	12	7.05	14.2	12.04	2.84	0.21	0.15	0.21		38.2		14.83		147.4	0.03	90.6	6.06	3.54	1.44	16.7	4.95	2.62	1.29	5.82		0.49			5.53	11.53	48.4	0.7	2.29	2.53	50.2	3.8		158.02	0.36	0.93	0.41
WFL2009-D71-R013	GL	JUAN	CLAGUE, 2013; DREYER, 2013	EMP; LA-ICPMS	45.9755	-130.043	49.9	1.47	10.81	7.53	15	12.52	2.63	0.15	0.14	0.19		26.1		12.1	39.4	287.2	0.023		4.94	3.15	1.29		4.23	2.26	1.13	4.43		0.27			4.32	10	47.4	0.45	1.94	2.13	47.5	3.52		150.9	0.27	0.75	0.29
WFL2009-D71-R007	GL	JUAN	CLAGUE, 2013; DREYER, 2013	EMP; LA-ICPMS	45.9746	-130.031	49	1.24	9.78	8.61	16.4	12.33	2.53	0.12	0.11	0.17		21.5		9.35	40	317.9	0.02		4.45	2.59	1.05		3.52	1.81	0.9	3.23		0.18			3.13	8.15	85.8	0.5	1.49	1.97	39.6	2.74		145.2	0.18	0.58	0.2
WFL2009-D71-R014	GL	JUAN	CLAGUE, 2013; DREYER, 2013	EMP; LA-ICPMS	45.9722	-130.045	50.04	1.53	10.88	7.59	14.71	12.5	2.64	0.17	0.15	0.21		28.2		13.08	40.2	287.8	0.017		5.27	3.38	1.3		4.51	2.49	1.22	4.79		0.3			4.61	10.98	39.8	0.45	2.05	2.03	49.7	3.52		152	0.3	0.8	0.32
WFL2009-D71-R003	GL	JUAN	CLAGUE, 2013; DREYER, 2013	EMP; LA-ICPMS	45.9715	-130.033	49.85	1.53	10.91	7.59	14.7	12.45	2.71	0.17	0.14	0.2		27.6		12.82	38.4	297.6	0.012		5.24	3.39	1.3		4.48	2.45	1.14	4.75		0.29			4.63	10.6	46.6	0.43	2.03	2.21	48.9	3.52		158	0.29	0.78	0.32
WFL2009-D71-R016	GL	JUAN	CLAGUE, 2013; DREYER, 2013	EMP; LA-ICPMS	45.9714	-130.046	50.06	1.51	10.78	7.53	15.02	12.47	2.65	0.17	0.15	0.19		27.5		12.52	39.4	291	0.017		5.22	3.33	1.33		4.47	2.5	1.12	4.74		0.31			4.7	10.31	52.7	0.41	1.96	2.19	47.8	3.37		151.9	0.31	0.8	0.32
WFL2009-D71-R002	GL	JUAN	CLAGUE, 2013; DREYER, 2013	EMP; LA-ICPMS	45.9687	-130.032	49.83	1.51	10.94	7.57	14.74	12.41	2.71	0.18	0.15	0.19		28.2		12.99	37.8	289	0.013		5.19	3.32	1.37		4.4	2.37	1.11	4.85		0.3			4.79	10.6	46.5	0.44	2.06	2.14	49.3	3.55		156.6	0.3	0.81	0.32
WFL2011-D262-R005	GL	JUAN	CLAGUE, 2013; DREYER, 2013	EMP; LA-ICPMS	45.9687	-129.99	49.46	1.32	10.15	8.35	15.81	12.4	2.65	0.12	0.11	0.17		27.5		12.83	39.8	278.2	0.01		5.03	3.39	1.41		4.01	2.39	1.05	4.43		0.45			4.42	10.33	47.4	0.46	2.03	2.14	46.3	3.21		155.1	0.29	0.73	0.29
WFL2009-D74-R001	GL	JUAN	CLAGUE, 2013; DREYER, 2013	EMP; LA-ICPMS	45.9682	-130.017	48.98	1.27	9.97	8.52	16.14	12.36	2.59	0.11	0.11	0.19		17.7		9.39	41.1	318	0.01		4.87	3.04	1.1		4	2.09	1.01	3.32		0.43			3.01	8.64	87.3	0.38	1.62	1.4	43.5	2.97		144.2	0.21	0.71	0.2
WFL2009-D71-R001	GL	JUAN	CLAGUE, 2013; DREYER, 2013	EMP; LA-ICPMS	45.9669	-130.031	50.13	1.56	10.97	7.58	14.67	12.36	2.76	0.17	0.16	0.2		28.1		12.8	36.8	265.2	0.013		5.38	3.33	1.28		4.64	2.47	1.19	4.77		0.29			4.71	10.48	44	0.47	2.09	2.25	48.7	3.54		154.9	0.29	0.82	0.32
WFL2009-D75-R001	GL	JUAN	CLAGUE, 2013; DREYER, 2013	EMP; LA-ICPMS	45.9667	-130.025	49.26	1.29	10.14	8.4	16.01	12.45	2.64	0.11	0.12	0.18		19.3		9.85	42	317.1	0.007		5.16	3.25	1.23		4.32	2.42	1.15	3.56		0.46			3.09	8.64	82.5	0.41	1.67	1.49	46.4	2.98		147.1	0.21	0.74	0.22
WFL2009-D74-R005	GL	JUAN	CLAGUE, 2013; DREYER, 2013	EMP; LA-ICPMS	45.9666	-130.01	48.95	1.27	10.04	8.51	16.11	12.46	2.59	0.11	0.12	0.18		17.7		9.58	40.5	319.7	0.006		4.94	3.05	1.14		3.98	2.19	1.01	3.33		0.42			3.04	8.68	84.4	0.31	1.6	1.34	44	3.02		143.6	0.2	0.74	0.21
WFL2009-D74-R007	GL	JUAN	CLAGUE, 2013; DREYER, 2013	EMP; LA-ICPMS	45.9657	-130.006	49.3	1.36	10.16	8.25	15.91	12.4	2.59	0.11	0.12	0.19		18.6		9.55	37.9	299.6	0.013		4.73	2.8	1.17		4.29	2.04	1.04	3.42		0.41			2.94	8.88	73.3	0.39	1.61	1.54	43.7	2.95		142.3	0.21	0.72	0.22
WFL2009-D74-R008	GL	JUAN	CLAGUE, 2013; DREYER, 2013	EMP; LA-ICPMS	45.9657	-130.003	48.82	1.28	9.86	8.74	16.41	12.32	2.59	0.13	0.12	0.18		18.4		9.49	41.4	308.3	0.016		4.67	3.06	1.16		3.75	2.06	0.98	3.31		0.43			2.99	8.66	90.3	0.41	1.64	1.57	42.1	2.88		152.1	0.19	0.78	0.21
WFL2011-D262-R004	GL	JUAN	CLAGUE, 2013; DREYER, 2013	EMP; LA-ICPMS	45.965	-129.991	49.94	1.39	10.76	7.75	14.88	12.55	2.63	0.15	0.11	0.17		29.2		13.08	38.8	255.4	0.015		5.26	3.31	1.36		4.62	2.49	1.18	4.42		0.48			4.63	10.74	41.5	0.52	2.12	2.28	48.4	3.53		157.8	0.29	0.76	0.31
WFL2009-D75-R004	GL	JUAN	CLAGUE, 2013; DREYER, 2013	EMP; LA-ICPMS	45.9644	-130.025	48.77	1.28	10.01	8.5	16.19	12.38	2.61	0.11	0.11	0.18		18.3		9.57	42.5	319.8	0.005		5.05	3.1	1.14		4.14	2.1	1.08	3.39		0.44			3.08	8.46	84.2	0.41	1.53	1.52	45.6	3.19		143.9	0.21	0.77	0.21
WFL2011-D259-R001	GL	JUAN	CLAGUE, 2013; DREYER, 2013	EMP; LA-ICPMS	45.9644	-130.054	49.86	1.5	11.02	7.48	14.74	12.54	2.66	0.16	0.12	0.17		28.4		13.27	39.6	282.2	0.017		5.27	3.14	1.35		3.86	2.32	1.14	4.51		0.42			4.67	11.17	44.8	0.49	1.97	2.16	48.6	3.44		159	0.3	0.79	0.3
WFL2011-D259-R002	GL	JUAN	CLAGUE, 2013; DREYER, 2013	EMP; LA-ICPMS	45.9644	-130.054	49.79	1.47	10.98	7.48	14.68	12.45	2.65	0.16	0.12	0.2		27		13.16	37.4	271.1	0.005		4.83	3.21	1.27		5.03	2.27	1.1	4.49		0.49			4.63	9.95	42.6	0.45	2.11	2.16	48.1	3.7		156.2	0.28	0.81	0.32
WFL2009-D74-R012	GL	JUAN	CLAGUE, 2013; DREYER, 2013	EMP; LA-ICPMS	45.9633	-129.996	48.79	1.26	9.81	8.74	16.49	12.27	2.61	0.12	0.12	0.18		18.5		9.57	41.2	309.1	0.009		4.83	2.97	1.11		3.85	2.09	1.01	3.34		0.46			3.06	8.39	90.1	0.37	1.63	1.45	42.9	2.94		152.8	0.2	0.7	0.21
WFL2011-D262-R003	GL	JUAN	CLAGUE, 2013; DREYER, 2013	EMP; LA-ICPMS	45.9632	-129.992	48.57	1.27	9.89	8.47	16.28	12.26	2.64	0.13	0.1	0.16		28.4		12.6	37.4	263.6	0.017		4.64	3.07	1.31		4.21	2.32	1.06	4.66		0.45			4.52	9.8	42.5	0.54	2.09	2.39	47.9	3.45		156.5	0.27	0.75	0.3
WFL2009-D75-R010	GL	JUAN	CLAGUE, 2013; DREYER, 2013	EMP; LA-ICPMS	45.9623	-130.013	49.57	1.49	10.4	7.92	15.29	12.48	2.75	0.18	0.15	0.19		28		13.06	40	313.8	0.016		5.21	3.28	1.21		4.61	2.65	1.09	4.88		0.43			4.76	11.16	53.6	0.47	2.05	2.17	48.6	3.17		166	0.29	0.79	0.34
WFL2011-D262-R002	GL	JUAN	CLAGUE, 2013; DREYER, 2013	EMP; LA-ICPMS	45.9623	-129.992	48.84	1.29	9.81	8.6	16.34	12.24	2.6	0.13	0.1	0.18		27.6		13.17	36.7	252.4	0.009		5	3.14	1.3		4.27	2.33	1.14	4.66		0.49			4.33	10.9	41.5	0.44	2.05	2.04	48.4	3.46		157.7	0.29	0.79	0.31
WFL2011-D259-R003	GL	JUAN	CLAGUE, 2013; DREYER, 2013	EMP; LA-ICPMS	45.9622	-130.055	48.99	1.45	10.96	7.75	15.29	12.06	2.85	0.16	0.12	0.19		26.2		12.56	36.5	261.5	0.024		4.94	2.99	1.25		4.63	2.34	1.09	4.39		0.44			4.25	9.98	41	0.46	1.92	2.08	45.5	3.14		150	0.27	0.71	0.28
WFL2009-D75-R006	GL	JUAN	CLAGUE, 2013; DREYER, 2013	EMP; LA-ICPMS	45.9619	-130.022	49.42	1.54	10.93	7.59	14.6	12.44	2.74	0.17	0.14	0.18		28.3		13.02	41.4	302.5	0.016		5.78	3.56	1.28		5.05	2.76	1.22	4.89		0.49			4.89	10.66	49.3	0.5	2.11	2.18	52.5	3.31		159.3	0.33	0.87	0.33
WFL2009-D75-R013	GL	JUAN	CLAGUE, 2013; DREYER, 2013	EMP; LA-ICPMS	45.9609	-130.013	49.11	1.3	10	8.47	16.22	12.45	2.62	0.11	0.12	0.19		18.3		9.5	38.5	302.3	0.006		4.76	3.1	1.16		3.88	2.07	1	3.26		0.41			2.9	8.42	79.6	0.36	1.56	1.45	43.6	2.87		142.3	0.17	0.7	0.2
WFL2009-D74-R013	GL	JUAN	CLAGUE, 2013; DREYER, 2013	EMP; LA-ICPMS	45.9607	-129.994	49.15	1.32	10.11	8.35	15.86	12.4	2.61	0.12	0.12	0.19		20.1		9.58	41	321.2	0.015		4.93	3.1	1.2		3.76	2.09	1.07	3.5		0.43			3.17	8.88	76.5	0.4	1.62	1.83	44.8	2.96		143.6	0.19	0.72	0.22
WFL2009-D79-R020	GL	JUAN	CLAGUE, 2013; DREYER, 2013	EMP; LA-ICPMS	45.96	-129.988	50.04	1.59	11.42	7.31	14.53	12.38	2.75	0.17	0.15	0.2		28.4		13.57	42.5	207.6	0.014		5.45	3.46	1.34		4.7	2.52	1.24	4.88		0.51			4.97	11.2	37.6	0.49	2.17	2.3	49	3.53		154.1	0.31	0.84	0.33
WFL2009-D75-R016	GL	JUAN	CLAGUE, 2013; DREYER, 2013	EMP; LA-ICPMS	45.9596	-130.015	49.22	1.34	10.22	8.25	15.86	12.49	2.66	0.12	0.11	0.18		20.3		10.16	41.3	325.8	0.008		5.45	3.13	1.19		4.38	2.32	1.05	3.56		0.45			3.17	9.48	74.5	0.43	1.71	1.68	46.8	3.1		145.3	0.23	0.76	0.23
WFL2009-D79-R018	GL	JUAN	CLAGUE, 2013; DREYER, 2013	EMP; LA-ICPMS	45.9572	-129.987	49.7	1.56	10.85	7.66	14.73	12.55	2.72	0.17	0.15	0.19		29.3		13.25	41.9	310.1	0.013		5.41	3.48	1.35		4.44	2.54	1.16	4.94		0.52			5.11	10.9	55.3	0.47	2.13	2.27	49.4	3.49		160	0.32	0.79	0.34
WFL2011-D259-R008	GL	JUAN	CLAGUE, 2013; DREYER, 2013	EMP; LA-ICPMS	45.9561	-130.057	50.22	1.57	11.45	7.33	14.58	12.32	2.77	0.17	0.15	0.19		30.4		13.22	40.1	198.7	0.012		4.98	2.98	1.23		4.15	2.4	1.04	4.6		0.4			4.79	10.5	34.6	0.56	2.16	2.6	45.5	3.36		150.9	0.29	0.76	0.3
WFL2009-D79-R016	GL	JUAN	CLAGUE, 2013; DREYER, 2013	EMP; LA-ICPMS	45.9558	-129.984	49.81	1.51	11.11	7.55	14.81	12.62	2.67	0.17	0.14	0.19		26.8		13.03	43.2	297.6	0.018		5.45	3.27	1.33		4.39	2.32	1.13	4.64		0.51			4.55	10.31	45.5	0.47	2.05	2.12	48.5	3.41		151.8	0.29	0.78	0.31
WFL2009-D74-R020	GL	JUAN	CLAGUE, 2013; DREYER, 2013	EMP; LA-ICPMS	45.9553	-129.998	49.1	1.3	10.05	8.38	15.8	12.37	2.61	0.11	0.11	0.17		19.4		9.83	41.5	323.6	0.015		4.82	3.19	1.15		4.02	2.23	1.06	3.59		0.46			3.15	8.99	79.4	0.46	1.68	1.6	45.1	3.02		143.5	0.22	0.75	0.22
WFL2009-D74-R021	GL	JUAN	CLAGUE, 2013; DREYER, 2013	EMP; LA-ICPMS	45.9548	-129.999	49.53	1.46	10.33	7.88	15.28	12.33	2.72	0.17	0.15	0.2		28.9		12.99	40.9	316.9	0.012		5.36	3.42	1.24		4.58	2.52	1.14	4.99		0.45			4.97	10.55	53.8	0.53	2.06	2.37	48.4	3.18		166.6	0.33	0.82	0.33
WFL2009-D75-R020	GL	JUAN	CLAGUE, 2013; DREYER, 2013	EMP; LA-ICPMS	45.9547	-130.023	49.24	1.34	10.29	8.12	15.64	12.45	2.64	0.12	0.12	0.19		20.9		9.83	39.6	318.1	0.013		5.04	3.05	1.26		3.97	2.25	1.09	3.56		0.43			3.27	8.84	66.9	0.51	1.63	1.92	46.5	3.08		142.7	0.2	0.77	0.22
WFL2009-D74-R023	GL	JUAN	CLAGUE, 2013; DREYER, 2013	EMP; LA-ICPMS	45.9538	-130.005	49.27	1.31	10.06	8.52	16.26	12.35	2.62	0.12	0.11	0.18		18.2		9.82	41.9	321.8	0.007		5.19	3.19	1.15		4.14	2.13	1.06	3.38		0.45			3.07	8.8	87.5	0.43	1.65	1.48	45.2	3.23		135.2	0.2	0.77	0.21
WFL2011-D259-R009	GL	JUAN	CLAGUE, 2013; DREYER, 2013	EMP; LA-ICPMS	45.9534	-130.055	50.21	1.57	11.26	7.37	14.55	12.28	2.77	0.17	0.13	0.21		27.6		13.05	36.8	219	0.023		5.17	3.02	1.16		4.08	2.26	1.06	4.63		0.36			4.59	10.39	35.6	0.49	2.04	2.08	45.8	3.05		150.1	0.3	0.79	0.3
WFL2011-D259-R013	GL	JUAN	CLAGUE, 2013; DREYER, 2013	EMP; LA-ICPMS	45.9534	-130.044	49.97	1.51	10.93	7.52	14.95	12.42	2.65	0.16	0.12	0.18		27.4		12.67	39.4	300	0.013		5.23	3.31	1.23		4.18	2.46	1.18	4.75		0.49			4.45	10.93	54.2	0.45	2.02	2.03	48.2	3.28		157	0.3	0.81	0.33
WFL2009-D79-R013	GL	JUAN	CLAGUE, 2013; DREYER, 2013	EMP; LA-ICPMS	45.9533	-129.976	49.9	1.55	10.93	7.57	14.85	12.43	2.71	0.18	0.15	0.17		29.4		13.35	41.4	312.1	0.014		5.17	3.35	1.3		4.46	2.41	1.11	4.87		0.48			4.97	10.69	55.5	0.49	2.11	2.33	47.7	3.46		157.8	0.31	0.79	0.33
WFL2011-D259-R011	GL	JUAN	CLAGUE, 2013; DREYER, 2013	EMP; LA-ICPMS	45.9526	-130.051	50.37	1.52	11.23	7.39	14.61	12.36	2.76	0.17	0.14	0.2		27.3		12.87	37.9	261	0.009		4.73	3	1.2		3.92	2.27	1.06	4.5		0.4			4.39	9.87	37	0.45	1.96	2.22	46.7	3.22		150.8	0.28	0.78	0.29
WFL2009-D75-R022	GL	JUAN	CLAGUE, 2013; DREYER, 2013	EMP; LA-ICPMS	45.9509	-130.024	49.66	1.54	11.08	7.56	14.78	12.45	2.74	0.18	0.14	0.2		27.7		12.88	39.1	289.5	0.013		5.34	3.55	1.28		4.59	2.54	1.18	4.8		0.48			4.69	10.59	46.6	0.49	2.07	2.24	50.4	3.55		157.9	0.29	0.8	0.32
WFL2009-D74-R026	GL	JUAN	CLAGUE, 2013; DREYER, 2013	EMP; LA-ICPMS	45.9502	-130.013	50.18	1.56	10.83	7.5	14.82	12.52	2.7	0.17	0.15	0.19		29.2		13.33	40.2	298.1	0.016		5.92	3.73	1.37		5.07	2.71	1.25	4.99		0.51			5.13	11.5	50.8	0.5	2.13	2.34	51.8	3.48		160.8	0.33	0.92	0.36
ALV1411-001B	GL	JUAN10	RYAN, 1987	DCP	45.95	-130.02																											5.28
ALV1411-001-B	GL	JUAN10	Gale, 2013	ICP-MS	45.95	-130.02	49.5188	1.54818	11.0496	7.39055	14.6841	12.1017	2.72045	0.168435	0.158527			26.084	0.72	12.289	46.6	311	0.02123	98.8	5.089	3.18058	1.238	17.62	4.23615	2.393	1.098	4.632		0.454			4.963	10.112	47.4	0.506	1.993	2.005	48.5	3.364		154.285	0.313	0.8	0.3
WFL2009-D75-R025	GL	JUAN	CLAGUE, 2013; DREYER, 2013	EMP; LA-ICPMS	45.95	-130.027	49.5	1.56	10.82	7.63	15.16	12.31	2.83	0.2	0.16	0.18		34		14.3	38.2	278	0.022	92.1	5.32	3.37	1.37	17.3	4.32	2.48	1.14	5.36		0.46			5.69	11.19	58.5	0.59	2.14	2.83	48.6	3.62		171.6	0.34	0.8	0.4
WFL2009-D75-R028	WR	JUAN	DREYER, 2013	ICPMS; XRF	45.95	-130.028	49.33	1.53	11.26	7.22	15.02	12.39	2.75	0.18	0.12	0.2		24.13		12.08		274.2	0.02	100.3	5.82	3.52	1.31	15.9	4.66	2.42	1.26	4.47		0.49			3.8	10.03	50.8	0.5	1.94	2.01	47.53	3.46		146.8	0.26	0.88	0.3
WFL2009-D75-R029	WR	JUAN	DREYER, 2013	ICPMS; XRF	45.95	-130.028	49.56	1.51	11.12	7.44	14.46	12.34	2.71	0.19	0.13	0.2		26.05		12.41		248.7	0.03	93.1	5.72	3.34	1.33	16.8	4.61	2.42	1.22	4.62		0.46			4.13	10.14	47.1	0.46	1.99	2.02	44.64	3.47		144.82	0.28	0.88	0.32
XL1723-1A	GL	JUAN10	Sun et al., 2003	LA-ICP-MS	45.95	-130												27.2		12.7			0.026	109	4.8	2.96	1.23		4.24	2.23	1.03	4.54		0.42		0.45	4.59	9.32		0.573	1.94	2.37	48	3.2		152	0.279	0.71	0.31
XL1739-2A	GL	JUAN10	Sun et al., 2003	LA-ICP-MS	45.95	-130												25.3		11.8			0.016	102	4.65	2.83	1.13		3.95	2.08	0.95	4.18		0.4		0.44	4.29	8.57		0.56	1.8	2.21	44.8	2.9		142	0.267	0.66	0.27
WFL2011-D270-R001	GL	JUAN	CLAGUE, 2013; DREYER, 2013	EMP; LA-ICPMS	45.9498	-129.984	49.8	1.44	10.79	7.51	14.96	12.36	2.58	0.13	0.12	0.18		20.7		11.13	37.4	280.2	0.009		4.99	2.92	1.27		4.57	2.29	1.08	3.82		0.45			3.42	9.61	46.7	0.38	1.78	1.52	46.4	3.05		140.7	0.23	0.79	0.24
WFL2009-D79-R011	GL	JUAN	CLAGUE, 2013; DREYER, 2013	EMP; LA-ICPMS	45.9497	-129.976	49.68	1.55	10.88	7.67	14.86	12.42	2.72	0.18	0.15	0.19		29		13.28	41.2	309	0.014		5.29	3.24	1.25		4.25	2.38	1.09	4.8		0.47			4.82	10.72	56.5	0.49	2.05	2.28	47.6	3.53		156.8	0.3	0.81	0.33
WFL2009-D79-R010	WR	JUAN	DREYER, 2013	ICPMS; XRF	45.9493	-129.977	49.46	1.53	11.23	7.39	14.7	12.24	2.75	0.16	0.13	0.2		25.03		12.08		237.2	0.02	94.2	5.84	3.46	1.34	16.5	4.67	2.47	1.25	4.41		0.48			3.95	10.16	51.7	0.46	1.96	1.48	44.26	3.54		140.52	0.27	0.89	0.31
WFL2009-D79-R008	GL	JUAN	CLAGUE, 2013; DREYER, 2013	EMP; LA-ICPMS	45.9477	-129.977	49.64	1.62	11.76	7.46	14.05	12.29	2.73	0.16	0.15	0.2		30.8		12.7	39	218.3	0.021		5.75	3.75	1.34		4.43	2.56	1.17	4.54		0.47			4.39	10.4	41.4	0.61	2.09	2.96	50.4	3.1		142.6	0.3	0.85	0.31
WFL2009-D79-R004	GL	JUAN	CLAGUE, 2013; DREYER, 2013	EMP; LA-ICPMS	45.9462	-129.983	49.55	1.52	10.85	7.66	14.68	12.42	2.68	0.18	0.15	0.2		29		13.21	40.2	306.8	0.012		5.32	3.74	1.3		4.3	2.55	1.18	4.86		0.49			4.96	10.73	55.4	0.47	2.08	2.33	50.9	3.58		157.5	0.33	0.82	0.34
WFL2006-1009-VC-1/14.1-15.3	GL	JUAN	DREYER, 2013	ICPMS; MC-ICP-MS	45.9441	-130.026												25.4		12.77	49.6	186.8	0.023		5.7	3.49	1.33		4.76	2.64	1.2	4.69		0.51			4.53	10.94	44.2	0.51	2.08	2.13	50	3.39		138.7	0.28	0.88	0.278
WFL2006-1009-R001	GL	JUAN	CLAGUE, 2013; DREYER, 2013	EMP; ICPMS; MC-ICP-MS	45.9433	-130.03	49.91	1.49	10.66	7.55	14.99	12.33	2.67	0.15	0.12	0.19		33.3		14.66	58.2	320.7	0.041		5.91	3.75	1.54		5.25	2.89	1.34	5.48		0.53			5.62	12.36	57.6	0.91	2.39	2.86	56.1	3.98		177.8	0.34	0.94	0.288
WFL2006-1009-R004	GL	JUAN	CLAGUE, 2013; DREYER, 2013	EMP; ICPMS; LA-ICPMS; MC-ICP-MS	45.938	-130.043	49.98	1.52	10.99	7.36	14.61	12.34	2.63	0.17	0.13	0.17		27.8		12.72	49	278.4	0.027		5.18	3.16	1.28		4.35	2.46	1.14	4.7		0.45			4.94	10.73	46.2	0.43	2.04	2.4	48.5	3.31		149.4	0.29	0.82	0.3
WFL2006-1009-R015	GL	JUAN	CLAGUE, 2013; DREYER, 2013	EMP; LA-ICPMS	45.9375	-130.031	49.98	1.49	10.88	7.41	14.61	12.31	2.61	0.16	0.14	0.2		28.1		13.01	40.4	279.5	0.018		5.19	3.29	1.27		4.29	2.35	1.11	4.66		0.45			4.47	10.44	42.3	0.47	2.06	2.42	48.5	3.25		152	0.27	0.78	0.3
WFL2006-1009-R012	GL	JUAN	CLAGUE, 2013; DREYER, 2013	EMP; ICPMS; LA-ICPMS; MC-ICP-MS	45.9371	-130.034	49.87	1.49	11.05	7.4	14.64	12.31	2.59	0.16	0.12	0.18		27.7		12.77	49.9	277.9	0.03		5.06	3.26	1.3		4.49	2.57	1.14	4.75		0.45			4.93	10.82	47	0.49	2.06	2.45	48.9	3.42		150.3	0.29	0.8	0.3
WFL2006-1009-R008	GL	JUAN	CLAGUE, 2013; DREYER, 2013	EMP; ICPMS; LA-ICPMS; MC-ICP-MS	45.9361	-130.044	49.76	1.53	11.17	7.07	14.39	12.15	2.67	0.17	0.13	0.21		27.8		12.64	49.3	276	0.03		5.25	3.22	1.26		4.52	2.53	1.11	4.67		0.44			4.95	10.5	46.8	0.41	2.03	2.38	48.5	3.44		148.6	0.31	0.8	0.32
WFL2011-D256-R001	GL	JUAN	CLAGUE, 2013; DREYER, 2013	EMP; LA-ICPMS	45.9353	-130.016	49.99	1.54	10.94	7.3	14.82	12.41	2.75	0.18	0.14	0.21		24.9		12.2	38	286.1	0.022		4.85	3.4	1.21		4.33	2.23	1.04	4.35		0.44			4.13	9.75	41.2	0.45	2	1.78	48.6	3.26		149.4	0.28	0.7	0.27
WFL2011-D256-R002	GL	JUAN	CLAGUE, 2013; DREYER, 2013	EMP; LA-ICPMS	45.9346	-130.018	50.13	1.47	10.95	7.66	15.08	12.37	2.62	0.16	0.13	0.2		23.2		12.02	40.2	290.9	0.002		5.04	3.2	1.29		4.02	2.44	1.12	4.24		0.42			3.91	9.6	59.5	0.45	1.96	1.82	47.8	3.67		159.9	0.26	0.8	0.27
WFL2009-D72-R011	GL	JUAN	CLAGUE, 2013; DREYER, 2013	EMP; LA-ICPMS	45.9338	-129.98	50.12	1.49	10.68	7.72	14.86	12.45	2.68	0.17	0.14	0.18		27.4		12.59	39.5	307.4	0.011		5.2	3.37	1.26		4.47	2.54	1.12	4.8		0.45			4.76	10.65	53.9	0.48	1.99	2.12	49	3.46		154.8	0.31	0.82	0.33
WFL2009-D72-R010	GL	JUAN	CLAGUE, 2013; DREYER, 2013	EMP; LA-ICPMS	45.9309	-129.981	50.09	1.26	10.26	8.2	15.23	12.73	2.48	0.1	0.12	0.18		14		8.63	38.2	303.8	0.003		4.69	2.87	1.1		3.63	1.97	0.99	2.86		0.4			2.38	8.01	51	0.29	1.45	1.11	46.1	2.71		119.9	0.14	0.7	0.16
WFL2009-D72-R007	GL	JUAN	CLAGUE, 2013; DREYER, 2013	EMP; LA-ICPMS	45.9276	-129.98	50	1.28	10.26	8.07	15.21	12.58	2.53	0.1	0.11	0.18		15.1		8.83	39.4	316.3	0.007		4.64	3.2	1.13		3.99	2.16	1.04	3.05		0.17			2.56	8.18	54	0.33	1.54	1.2	47.7	2.88		123.2	0.17	0.71	0.18
WFL2009-D72-R002	GL	JUAN	CLAGUE, 2013; DREYER, 2013	EMP; LA-ICPMS	45.9268	-129.973	49.86	1.51	10.65	7.65	14.89	12.49	2.69	0.17	0.16	0.19		28.2		12.44	39.2	305.2	0.018		5.22	3.18	1.28		4.33	2.46	1.07	4.72		0.29			4.56	10.68	52.9	0.47	2.07	2.27	48.3	3.43		155.4	0.29	0.81	0.33
WFL2009-D72-R005	GL	JUAN	CLAGUE, 2013; DREYER, 2013	EMP; LA-ICPMS	45.9236	-129.977	50.08	1.57	10.94	7.5	14.72	12.42	2.75	0.17	0.15	0.2		27.2		12.92	40.2	283.5	0.011		5.29	3.4	1.3		4.76	2.64	1.15	4.83		0.31			4.64	10.72	46.4	0.44	2.07	2.11	50.1	3.84		158.1	0.31	0.86	0.32
WFL2009-D73-R001	GL	JUAN	CLAGUE, 2013; DREYER, 2013	EMP; LA-ICPMS	45.8708	-129.985	49.35	1.27	10.05	8.36	16.18	12.52	2.58	0.1	0.12	0.17		14.6		8.85	39.9	300.8	0.007		4.58	2.88	1.14		3.73	2.03	1.01	3.17		0.41			2.63	8.36	82.4	0.34	1.54	1.17	43.5	2.86		139.5	0.17	0.66	0.18
WFL2009-D73-R007	GL	JUAN	CLAGUE, 2013; DREYER, 2013	EMP; LA-ICPMS	45.8687	-130.009	49.94	1.6	11.18	7.4	14.63	12.34	2.78	0.17	0.15	0.19		27.1		12.92	39.9	266.8	0.012		5.46	3.29	1.34		4.81	2.53	1.12	4.77		0.47			4.66	10.77	43.7	0.46	2.07	2.05	49.1	3.52		153.8	0.31	0.79	0.32
WFL2005-874-R008	GL	JUAN	CLAGUE, 2013; DREYER, 2013	EMP; ICPMS; LA-ICPMS; MC-ICP-MS	45.8682	-130.002	49.69	1.49	10.83	7.61	14.97	12.39	2.71	0.17	0.14	0.18		28.7		12.62	48.7	287.6	0.027		5.18	3.19	1.32		4.4	2.51	1.12	4.77		0.45			5.04	10.57	62.8	0.48	2.06	2.42	46.5	3.31		153	0.31	0.8	0.32
YAQ7401-003-013	GL	JUAN	Jenner and O'Neil, 2012	LA-ICP-MS	45.45	-130.13	46.88	0.82	10.18	9.63	17.76	12.23	2.16	0.03	0.1			2.45652	0.20257	4.06318	57.2118	237.347	bdl	104.994	3.05701	2.12569	0.693823	15.473	2.28274	1.02598	0.689468	1.21154	3.39133	0.306812	1464.99	0.329108	0.629183	4.06699	206.095	0.193746	0.707761	0.169982	39.9463	1.61505	0.504301	105.426	0.0400912	0.444205	0.0431182
YAQ7401-003-023	GL	JUAN	Jenner and O'Neil, 2012	LA-ICP-MS	45.45	-130.13	49.9	1.64	12	6.69	13.98	11.96	2.82	0.13	0.18			18.8279	0.517766	12.2316	49.3209	77.0922	0.0133184	93.8804	5.67036	3.61483	1.39278	18.6658	4.74645	2.55205	1.22716	4.19397	6.43154	0.520059	1785.23	0.637041	3.70036	10.4037	41.1695	0.437743	1.95656	1.46623	47.9549	3.63954	1.04719	127.996	0.224811	0.823316	0.22894
AII0125-11-017	GL	JUAN11	SMITH, 1994	XRF; ICPAES; ANC	45.333	-130.085	50.5594	1.39888	10.6914	7.32412	14.4884	12.1902	2.46802	0.119904	0.159872	0.219823		33.7			37.2	220		63.4				19.7									4.18		61.7			2.43	45			114
AII0125-11-018	GL	JUAN11	SMITH, 1994	XRF; ICPAES; ANC	45.328	-130.075	50.5482	1.42136	10.6101	7.337	14.5138	12.2116	2.47236	0.130124	0.140134	0.22021					37.5	215		63.8				18.7									3.86		62				44			119
YAQ7401-004-002	GL	JUAN	Jenner and O'Neil, 2012	LA-ICP-MS	45.27	-130.13	50.14	1.92	11.98	6.81	14.03	11.66	2.45	0.16	0.22			16.3337	0.581605	14.2046	45.6853	199.87	0.0106598	62.6865	6.87176	4.38261	1.56546	19.1189	5.76025	3.24317	1.47596	4.77623	7.20086	0.615083	1762.71	0.749737	4.34734	12.6762	60.3166	0.531313	2.29666	1.40117	46.73	4.43299	1.28167	113.086	0.268418	1.01114	0.24807
YAQ7401-004-003	GL	JUAN	Jenner and O'Neil, 2012	LA-ICP-MS	45.27	-130.13	50.28	1.56	10.43	7.43	14.85	11.84	2.4	0.19	0.18			19.7764	0.513048	12.0442	44.9907	223.614	0.0160209	65.8415	5.16969	3.24129	1.25884	17.6766	4.34833	2.40111	1.10109	4.34664	5.77195	0.467243	1546.99	0.657758	4.67624	9.96161	80.1079	0.432147	1.85488	1.56591	43.7183	3.35237	0.946541	131.512	0.276639	0.756468	0.263616
ALV1410-002-A	GL	JUAN11	Gale, 2013	ICP-MS	45.22	-130.16	49.5803	1.3124	9.73018	8.60733	15.199	12.2414	2.51988	0.119686	0.12966			11.622	0.55	8.806	43.8	376	0.01026	73.9	4.643	2.97068	1.065	16.59	3.75348	2.023	1.019	3.055		0.428			2.93	8.064	97.3	0.402	1.508	0.873	43.8	2.844		123.398	0.198	0.719	0.164
ALV1410-003-B	GL	JUAN11	Gale, 2013	ICP-MS	45.22	-130.16	49.9662	1.32341	9.70098	8.42292	15.288	12.1444	2.34685	0.118834	0.128737			11.428	0.54	8.773	43.3	373	0.00894	72.6	4.632	2.94173	1.055	16.47	3.74883	2.028	1.005	3.028		0.43			2.933	7.903	96.7	0.36	1.496	0.882	43.4	2.811		122.333	0.197	0.711	0.16
AII0125-11-012-A	GL	JUAN11	SMITH, 1994	XRF; ICPAES; ANC	45.17	-130.157	50.0724	1.13937	9.37483	8.12552	15.6913	12.4931	2.3487	0.0899504	0.119934	0.209884		18.3			41.6	303		70.3				17.1									2.86		88.1			1.02	42			120
AII0125-11-012-B	GL	JUAN11	SMITH, 1994	XRF; ICPAES; ANC	45.17	-130.157	49.9972	1.15762	9.35077	8.34284	15.568	12.4743	2.35516	0.0898153	0.129733	0.199589		18.9			40.9	273		70.1				17.6									8.91		88.3			1.45	41.5			119
ALV2430-002	GL	JUAN11	SMITH, 1994	XRF; ICPAES; ANC	45.158	-130.135	49.4181	1.73767	10.7474	7.93502	14.8656	12.0532	2.55126	0.0602659	0.150665	0.190842					43.9	220		64.2				17.3									3.1		74.6				55.1			117
ALV2430-001	GL	JUAN11	SMITH, 1994	XRF; ICPAES; ANC	45.133	-130.167	48.9705	1.45912	10.5936	7.90524	15.7905	12.0927	2.53847	0.0599639	0.129922	0.169898					38.9	250		66.7				16									3.6		69.5			2.1	50.6			112
YAQ7401-005-003	GL	JUAN	Jenner and O'Neil, 2012	LA-ICP-MS	45.13	-130.12	49.86	1.69	11.21	7.25	14.13	12.25	2.33	0.14	0.2			13.8174	0.486123	11.4603	45.1833	247.835	0.0114145	73.0668	5.79854	3.66022	1.30888	18.1033	4.79417	2.57511	1.26711	3.83812	6.66687	0.508314	1647.22	0.581468	3.52399	10.1814	57.6203	0.409991	1.88084	1.21833	45.4812	3.59646	1.02476	103.139	0.213334	0.835346	0.189576
YAQ7401-005-012	GL	JUAN	Jenner and O'Neil, 2012	LA-ICP-MS	45.13	-130.12	50.31	1.97	12.24	6.63	13.9	11.39	2.44	0.17	0.2			15.3686	0.574588	14.1006	45.7768	177.465	0.00985766	63.5761	7.18004	4.47843	1.60562	19.5201	5.87197	3.25247	1.56328	4.69073	8.18172	0.649273	1807.97	0.759949	4.18572	12.8605	56.1127	0.516308	2.32716	1.3591	47.6846	4.47608	1.30543	109.817	0.252437	1.06485	0.244136
AII0125-11-011	GL	JUAN12	SMITH, 1994	XRF; ICPAES; ANC	45.068	-130.147	50.2311	1.40366	10.9285	7.30907	14.5379	12.3322	2.43636	0.100262	0.160419	0.210549		28.7			39.9	235		63.6				17.6									3.1		74.4			1.97	41.9			121
AII0125-11-020-001	WR	JUAN12	SMITH, 1994	ICP-MS	45.032	-130.217														12					6	3.7	1.4		5		1.3	4.1						11						3.6
ALV2432-002	GL	JUAN12	SMITH, 1994	XRF; ICPAES; ANC	45.023	-130.184	49.3277	1.29286	10.6413	7.85664	15.1166	12.3319	2.66529	0.0994511	0.139232	0.179012		24.4			39.7	240		65.1				18.1									3.8		65.9			2.3	53.3			114
ALV2432-001	GL	JUAN12	SMITH, 1994	XRF; ICPAES; ANC	45.017	-130.217	49.0947	1.55036	10.5345	7.77168	15.5036	12.224	2.66344	0.0596292	0.139135	0.168949		26.1			38.2	240		64				16.1									3.9		64				55.1			113
ALV2262-003	GL	JUAN12	SMITH, 1994	XRF; ICPAES; ANC	45.015	-130.186	50.4086	1.22751	10.3634	7.57638	14.6899	12.4764	2.45503	0.100616	0.130801	0.221355		24.8			38.6	250		66.8				19.4											79.1				41.9			118
ALV2262-004	GL	JUAN12	SMITH, 1994	XRF; ICPAES; ANC	45.015	-130.187	50.2327	1.2382	10.1673	7.71107	14.8987	12.5833	2.40593	0.100667	0.140933	0.171133		26.5			41.3	280		68.6				19											78.1				43.6			121
ALV2262-007	GL	JUAN12	SMITH, 1994	XRF; ICPAES; ANC	45.014	-130.191	50.1705	1.25176	10.0141	7.72085	15.1212	12.5176	2.37333	0.100141	0.140197	0.240338		22			38.1	290		67.6				16.5									4.1		75.7			2	42			113
ALV2262-008	GL	JUAN12	Sun et al., 2003	LA-ICP-MS	45.014	-130.191												13		10.1			0.009	79.3	4.77	3.06	1.11		4.1	2.04	1.01	3.35		0.44		0.4	3.07	8.07		0.505	1.62	1.23	44.3	2.88		117	0.211	0.7	0.17
ALV2262-009	GL	JUAN12	SMITH, 1994	XRF; ICPAES; ANC	45.01	-130.189	49.8926	1.2924	10.1188	7.91469	15.0279	12.6234	2.36439	0.0901674	0.14026	0.200372		26.7			36.6	290		71.1				17.3											72.8				45			113
ALV2266-001	GL	JUAN12	SMITH, 1994	XRF; ICPAES; ANC	44.995	-130.198	49.9501	1.26127	10.01	7.90794	15.1152	12.6127	2.32233	0.1001	0.140141	0.230231		18			38.4	290		69.8				18.1									4.1		83				44.7			112
ALV2266-002	GL	JUAN12	SMITH, 1994	XRF; ICPAES; ANC	44.995	-130.198	50.0389	1.22832	10.0682	7.93373	15.1023	12.5852	2.31568	0.0906137	0.130886	0.171159		23.6			37.3	290		68.7				22.1											79.91				40.4			113
ALV2261-003	GL	JUAN12	SMITH, 1994	XRF; ICPAES; ANC	44.99	-130.201	49.9824	1.22957	9.99649	8.02718	15.1947	12.4956	2.33918	0.0899684	0.139951	0.16994		31.7			36	270		70.7				20.5											85.2				44.8			115
ALV2442-008	WR	JUAN12	SMITH, 1994	ICP-MS	44.988	-130.202														9.4					5	3	1.1		4.1		1.1	3.4						8.3						2.7
ALV2269-003	GL	JUAN12	SMITH, 1994	XRF; ICPAES; ANC	44.987	-130.2	50.0885	1.22461	9.83701	8.0001	15.2574	12.4468	2.38899	0.0903399	0.130491	0.200755		20.6			35.9	270		68.5				17.4									3.6		69.6				42.5			115
ALV2269-002	GL	JUAN12	Sun et al., 2003	LA-ICP-MS	44.984	-130.203	50.4961	1.42706	10.7778	7.33491	14.4702	12.0752	2.5747	0.109774	0.139713	0.229528		15.3		11.9			0.013	77	5.64	3.5	1.25		4.66	2.26	1.19	3.92		0.51		0.46	3.64	9.31		0.539	1.84	1.46	46.8	3.46		116	0.249	0.79	0.22
ALV2269-001	GL	JUAN12	SMITH, 1994	XRF; ICPAES; ANC	44.983	-130.211	50.1899	1.30974	9.89801	7.91841	15.097	12.3975	2.41951	0.0999799	0.139972	0.179964		31.1			39.8	250		68.6				18.6											74.6				44.9			120
ALV2435-004	WR	JUAN12	SMITH, 1994	ICP-MS	44.983	-130.198														9.6					5	3	1.1		4.1		1.1	3.4						8.7						2.9
ALV2435-009b	WR	JUAN12	SMITH, 1994	ICP-MS	44.983	-130.198														9.8					5.1	3	1.2		4.3		1.1	3.5						8.9						3.1
2082-6A		JUAN12	Arevalo, 2008	ICP-MS	44.98	-130.22	49.97	1.4855	10.05	7.75	15.2	12.27	2.34	0.136843	0.13			11.9034		9.83728		319.519			4.56586	2.96852	1.10301		3.85345	1.93651	0.978619	3.18525		0.422449			3.02512	8.48475		0.32975	1.58372		39.622	2.92048		114.409	0.201947	0.687231	0.168595
ALV2093-001-A	GL	JUAN12	Sun et al., 2003	LA-ICP-MS	44.98	-130.22	50.1662	1.6663	11.0573	7.51522	14.4003	11.6174	2.63236	0.16009	0.140079			14		11.4			0.004	68.8	5.41	3.37	1.24		4.51	2.32	1.16	3.74		0.5		0.46	3.54	8.99		0.533	1.82	1.38	43.8	3.33		111	0.229	0.78	0.2
ALV2077-003	GL	JUAN12	SMITH, 1994	XRF; ICPAES; ANC	44.979	-130.208	49.6589	1.50085	10.4757	7.52438	15.8143	11.7852	2.41747	0.120874	0.130946	0.191383		6			39.3	250		65.6													3.8		68.4							109
ALV2079-002b	WR	JUAN12	SMITH, 1994	ICPAES	44.976	-130.214														12					6.2		1.3		5.3			4.5												3.2
ALV2079-006b	GL	JUAN12	SMITH, 1994	XRF; ICPAES; ANC	44.976	-130.214	50.2729	1.51316	10.5523	7.65542	14.833	11.8465	2.48876	0.11946	0.13937	0.199101					43.4	270		72.6													5.1		71.5							118
ALV2080-001a	GL	JUAN12	SMITH, 1994	XRF; ICPAES; ANC	44.972	-130.212	50.1339	1.53492	10.565	7.52507	15.1498	11.761	2.49175	0.119604	0.139538	0.19934		11			43.5	240		70.4													6.3		68.9							114
ALV2080-009	WR	JUAN12	SMITH, 1994	ICPAES	44.972	-130.212												12		11					5.9		1.3		5.1			3.9												3
ALV2079-002		JUAN12	Arevalo, 2008	ICP-MS	44.97	-130.23	49.93	1.7435	11.03	7.43	14.5	12	2.48	0.16753	0.15			13.4275		11.8126		249.81			5.83236	3.82815	1.31687		5.01401	2.60146	1.26651	4.01643		0.559042			3.65755	10.7154			1.96119		44.0762	3.70852		121.841	0.249613	0.89194	0.248161
ALV2444-001	WR	JUAN12	SMITH, 1994	ICP-MS	44.963	-130.217														11					5.8	3.5	1.3		4.9		1.3	3.8						9.8						3.4
ALV2092-002	GL	JUAN12	SMITH, 1994	XRF; ICPAES; ANC	44.96	-130.212	50.5615	1.45802	10.5757	7.50982	14.6302	12.0836	2.38677	0.109851	0.129824	0.189743					43.9	260		71.1													3.4		81.5							111
ALV2075-001	WR	JUAN12	SMITH, 1994	ICPAES	44.93	-130.25												12		11					6.2		1.3		5.3			4												3.3
ALV2264-001a	GL	JUAN12	SMITH, 1994	XRF; ICPAES; ANC	44.92	-130.232	50.031	1.41654	10.2473	7.79599	15.0696	12.357	2.30062	0.100464	0.130603	0.200928		31.6			43.8	250		70.7				17.2									4		86.9				44.4			104
ALV2078-004	GL	JUAN12	Sun et al., 2003	LA-ICP-MS	44.909	-130.239	50.0571	1.37569	10.4432	7.81233	14.992	12.2005	2.34972	0.090374	0.150623			11		9.51			0.008	76.3	5.15	3.25	1.13		4.16	2.06	1.1	3.06		0.47		0.39	2.78	7.8		0.457	1.55	1.12	43.2	2.99		98.5	0.184	0.72	0.17
ALV2264-002	GL	JUAN12	SMITH, 1994	XRF; ICPAES; ANC	44.905	-130.239	50.348	1.32126	10.4099	7.69734	14.8141	12.3117	2.3122	0.0900859	0.150143	0.2102		26.9			40.8	210		68.7				19.6											69.5			2.2	44.2			102
DSC1983-009-002	GL	JUAN12	Gale, 2013	ICP-MS	44.89	-130.26	50.1786	1.71091	11.2827	7.40588	14.16	11.522	2.57491	0.230598	0.180468			19.625	0.74	13.26	41.1	167	0.01714	64	5.957	3.84131	1.358	17.89	4.7895	2.791	1.311	4.791		0.545			5.448	11.204	55.3	0.511	2.121	1.696	42.8	3.825		122.908	0.353	0.913	0.305
DSC1983-005-002	GL	JUAN12	CHRISTIE, 1986; COTTRELL, 2011; GALE, 2013; MELSON, 2003; WALLACE, 1992	DCP; EMP; FTIR; ICPMS; SP-PH	44.82	-130.29	49.9375	1.59663	10.8715	7.94215	14.4182	11.7666	2.31789	0.219033	0.199121		0.2	21.965	0.7	12.647	42.7	205	0.01954	68.9	5.642	3.64382	1.272	17.54	4.62768	2.606	1.252	4.668		0.525			5.456	10.737	64.8	0.543	2.033	1.833	44.7	3.624		123.592	0.352	0.876	0.318
OCNGR68-007-VG175	GL	JUAN12	Jenner and O'Neil, 2012	LA-ICP-MS	44.75	-130.42	50.93	2.46	14.21	5.88	13.36	10.81	2.63	0.17	0.16			17.5084	0.680119	16.8456	48.0795	68.0944	0.0101887	57.9918	8.63467	5.41907	1.80999	21.2428	6.86687	4.02794	1.86052	5.51356	9.67153	0.781221	1914.05	0.78645	4.87202	15.3732	41.8238	0.639401	2.8282	1.64315	47.6159	5.44039	1.62095	102.47	0.30287	1.24097	0.358417
OCNGR68-009-VG176	GL	JUAN	Jenner and O'Neil, 2012	LA-ICP-MS	44.75	-130.42	50.65	1.83	12.52	6.56	14.11	11.63	2.48	0.12	0.12			11.8447	0.441307	10.8682	47.9153	82.6652	0.0122205	75.7217	6.33524	3.89721	1.36059	19.2731	4.91349	2.64004	1.33055	3.38681	7.10185	0.557118	1723.41	0.586554	3.04173	10.4041	43.5959	0.428634	1.88147	1.02423	46.154	3.74654	1.09485	92.4219	0.175399	0.897954	0.162773
DSC1983-C002-001	GL	JUAN12	RYAN, 1987; RYAN, 1993	DCP	44.73	-130.35																											10.5
DSC1983-R002-001	GL	JUAN12	Gale, 2013	ICP-MS	44.73	-130.35	50.8433	2.58607	14.2307	5.17166	12.9193	9.26182	3.2316	0.363587	0.373414			32.629	1.65	32.143	38.2	59	0.03817	51.9	13.407	8.61736	2.556	20.46	11.0363	7.116	2.889	11.447		1.207			10.492	28.768	26.5	0.975	5.3	3.394	39.2	9.245		115.816	0.758	2.075	0.754
DSC1983-003-002	GL	JUAN12	RYAN, 1987	DCP	44.72	-130.34	49.7314	1.89081	11.6741	7.4357	14.1379	11.5176	2.54641	0.179933	0.199925																		6.7
DSC1983-003-003	GL	JUAN12	Gale, 2013	ICP-MS	44.72	-130.34	50.1788	1.90456	11.7233	7.25445	13.9983	11.4766	2.43336	0.169332	0.189253			17.773	0.72	12.717	40.3	169	0.0171	61.2	6.117	3.91059	1.307	16.35	4.9011	2.895	1.338	4.507		0.559			4.659	11.481	59.1	0.439	2.135	1.534	41.5	3.777		106.59	0.308	0.937	0.266
AII84WF-013-001	GL	JUAN12	Gale, 2013	ICP-MS	44.7	-130.34	49.9173	1.55006	10.7018	7.7382	14.4711	12.1868	2.50202	0.149786	0.159771			13.786	0.6	10.163	41.7	317	0.00884	72.5	5.437	3.43908	1.192	17.62	4.371	2.365	1.211	3.599		0.506			3.682	9.303	66.4	0.389	1.744	1.104	42.4	3.319		108.115	0.243	0.838	0.201
ALV1455-004R	GL	JUAN12	Gale, 2013	ICP-MS	44.68	-130.35	50.4932	2.047	12.5543	6.4776	13.6946	10.5655	2.96238	0.209081	0.248906				1.08	20.703	42.6	81	0.03167	61.4	9.177	5.88139	1.811	19.46	7.59531	4.684	2.015	7.302		0.844			7.396	17.919	42.5	0.377	3.383		44	5.898		116	0.488	1.421	0.545
ALV1457-001R-C	GL	JUAN12	Gale, 2013	ICP-MS	44.68	-130.365	50.2644	1.97688	12.2716	6.92647	13.7051	11.0762	2.79822	0.149459	0.17935			16.506	0.76	13.874	45.8	88	0.01466	65.9	6.996	4.51548	1.483	19	5.65068	3.22	1.538	4.874		0.637			4.894	12.727	46	0.87	2.342	1.47	47.4	4.273		129.5	0.334	1.063	0.284
AII84WF-012-005	GL	JUAN12	Gale, 2013	ICP-MS	44.67	-130.36	50.1396	1.90148	12.3241	6.8986	13.8022	11.1343	2.77657	0.169971	0.169971			15.537	0.78	13.607	43.3	80	0.01407	63.5	6.922	4.43689	1.476	19.15	5.47677	3.124	1.52	4.728		0.635			4.838	12.53	44.1	0.493	2.289	1.486	43.1	4.254		112.845	0.321	1.051	0.281
ALV1409-001	GL	JUAN12	Gale, 2013	ICP-MS	44.67	-130.37	49.9663	1.86207	12.0011	7.09152	13.9444	11.2038	2.87314	0.170127	0.210157			17.214	0.81	13.687	45.3	89	0.01635	65.6	6.819	4.32729	1.425	19.18	5.50839	3.189	1.475	4.849		0.627			4.953	12.127	50.9	0.503	2.317	1.507	46.4	4.12		117.355	0.339	1.035	0.291
ALV1461-007R	GL	JUAN12	Gale, 2013	ICP-MS	44.67	-130.37	50.0686	1.96829	12.3828	7.08727	13.7663	11.0165	2.70688	0.149584	0.199446			16.27	0.78	13.978	44.6	84	0.01443	64.5	7.064	4.53409	1.498	19.06	5.7009	3.249	1.567	4.848		0.651			4.877	12.698	45	0.474	2.337	1.43	44.9	4.397		115	0.328	1.066	0.258
ALV2268-002	GL	JUAN12	SMITH, 1994	XRF; ICPAES; ANC	44.659	-130.36	50.3708	1.83258	11.9168	7.02988	14.1198	11.3159	2.48349	0.140197	0.170239	0.210296					41.5	66		60.8				24.8									4.1						48			109
ALV2268-003	GL	JUAN12	SMITH, 1994	XRF; ICPAES; ANC	44.659	-130.365	50.4012	1.86374	12.1243	6.75356	14.1284	11.1223	2.64531	0.140282	0.180362	0.230463		44			41.6	72		60.7				23.8									4.2						49.9			113
ALV2268-004	GL	JUAN12	SMITH, 1994	XRF; ICPAES; ANC	44.659	-130.365	50.1604	1.88227	11.9144	7.06852	14.117	11.3136	2.5731	0.140169	0.170205	0.250302		39.5			42.4	63		61.6				19									5.5		52.3				49.9			106
ALV2263-001	GL	JUAN12	SMITH, 1994	XRF; ICPAES; ANC	44.643	-130.366	50.1453	1.51136	10.7097	7.49677	14.6132	12.3111	2.42219	0.0800723	0.180163	0.21019		24.5			40	250		69				18.2									3.2		73.7			2.2	44.9			109
ALV2263-002L	GL	JUAN12	SMITH, 1994	XRF; ICPAES	44.643	-130.367	50.3747	1.91904	11.994	6.7766	13.993	11.3943	2.60869	0.13993	0.1999	0.189905					44.8	90		65				21.7									3.9					3.1	47.3			114
ALV2263-007	GL	JUAN12	SMITH, 1994	XRF; ICPAES; ANC	44.643	-130.371	50.2767	1.89667	12.243	6.76377	13.949	11.2395	2.67942	0.140494	0.19067	0.210741					47.2	70		60.4				22.1									4.6						51.8			116
ALV2263-008	GL	JUAN12	SMITH, 1994	XRF; ICPAES; ANC	44.643	-130.381	50.1861	2.11831	13.0662	6.35493	13.4622	11.2845	2.51426	0.118784	0.188074	0.326655					46.6	71		60.3				19.9											49.5				52			103
ALV2263-006	GL	JUAN12	Sun et al., 2003	LA-ICP-MS	44.642	-130.37												17.1		14.2			0.012	65.2	6.71	4.24	1.48		5.53	2.91	1.44	4.75		0.61		0.54	4.47	11.3		0.588	2.27	1.71	45	4.04		114	0.288	0.95	0.27
ALV2263-006B	GL	JUAN12	SMITH, 1994	XRF; ICPAES; ANC	44.642	-130.37	50.3223	1.92852	12.2541	6.6996	13.8612	11.3501	2.63163	0.140621	0.190843	0.210932		41.6			43	71		62.7				19.9									3.4		47.2				53.3			112
JdFMORB		JUAN12	Arevalo, 2008	ICP-MS	44.642	-130.37												15.0851		14.8414		89.2004			6.19265	4.02411	1.37884		5.29879	2.80839	1.34557	4.6011		0.592878			4.51024	12.0133		0.662006	2.26807		41.2752	3.92089		118.92	0.276958	0.953779	0.248668
AII84WF-002-001	GL	JUAN12	Gale, 2013	ICP-MS	44.64	-130.35	50.2207	1.93423	11.9889	6.97202	13.8023	11.106	2.92051	0.169239	0.20906			19.024	0.85	15.758	44.9	92	0.01941	66.7	7.472	4.76157	1.525	19.03	6.02454	3.57	1.629	5.661		0.679			5.711	14.247	50.5	0.538	2.655	1.859	45.2	4.629		117.015	0.392	1.137	0.351
DSC1983-001-004	GL	JUAN12	Gale, 2013	ICP-MS	44.64	-130.42	50.8	3.14	16.26	3.42	12.02	7.84	3.55	0.46	0.47			42.619	2.3	46.17	35.4		0.05445	39.9	19.031	12.1516	3.483	23.4	15.4985	10.152	4.088	16.119		1.714			14.792	41.18	6.9	1.445	7.464	4.767	36.9	13.167		112.353	1.061	2.935	1.132
DSC1983-R006-001	GL	JUAN12	CHRISTIE, 1986; COTTRELL, 2011; GALE, 2013; MELSON, 2003	DCP; EMP; FTIR; ICPMS; WET	44.64	-130.37	49.7395	1.79288	11.669	7.92942	14.1547	11.2954	2.42425	0.159456	0.179388		0.22	13.792	0.7	12.462	42.4	204	0.01269	67.6	6.453	4.19494	1.34	18.26	5.23032	2.931	1.442	4.313		0.608			4.383	11.291	59	0.457	2.11	1.319	43.2	3.993		100.696	0.293	1.002	0.253
DSC1983-002	WR	JUAN12	RYAN, 1987	DCP	44.61	-130.41	50.3628	1.93858	12.2241	6.77999	13.8613	10.848	2.78231	0.220977	0.231022	0.220977																	7.8
DSC1983-002-001	GL	JUAN12	CHRISTIE, 1986; COTTRELL, 2011; GALE, 2013; MELSON, 2003; RYAN, 1987; WALLACE, 1992	DCP; EMP; FTIR; ICPMS; SP-PH	44.61	-130.41	50.2654	1.83651	11.7817	7.40321	14.0272	11.0035	2.64222	0.168724	0.198499		0.45	17.122	0.8	13.439	44.7	85	0.01768	66.6	6.678	4.27766	1.434	18.4	5.38377	3.041	1.439	4.764		0.604			4.719	12.306	51.1	0.484	2.257	1.452	44.3	4.134		115.056	0.32	1.016	0.276
DSC1983-002-002	GL	JUAN12	YI, 2000	ICP-MS; MC-ICP-MS; EMP	44.61	-130.41	50.4992	1.92517	12.3188	6.70796	13.8802	10.7975	2.7247	0.199227	0.219149							83		72															58						1.35
DSC1983-006-002	GL	JUAN12	Gale, 2013	ICP-MS	44.57	-130.42	50.0456	1.6689	11.0397	7.63003	14.3061	11.6013	2.70767	0.158385	0.197981			15.218	0.65	12	41	171	0.01306	67.2	5.971	3.90438	1.31	17.92	4.79787	2.701	1.325	4.143		0.56			4.264	10.62	60.9	0.461	1.967	1.368	42.4	3.715		109.829	0.282	0.924	0.258
AII84WF-007-004	GL	JUAN12	Gale, 2013	ICP-MS	44.54	-130.43	50.3429	2.23132	13.1897	6.0902	13.5517	10.3855	2.92698	0.231123	0.26127			22.39	1.09	20.382	41.3	83	0.02284	61.2	9.247	5.76662	1.832	19.29	7.4679	4.756	1.993	7.373		0.835			7.475	18.329	39.7	0.619	3.455	2.259	42.3	5.96		110.207	0.498	1.4	0.477
NAUBLAN-017-001	WR	JUAN12	CORDIER, 2007	ICPAES	44.5	-130.4	50.0949	1.55224	10.7497	7.76118	14.6152	11.8938	2.42915	0.141112	0.161271	0.19151		12		10.7	43	282			6.2	3.6	1.3		5			3.6					3.7	10.4	87			1	43	3.6		111
NAUBLAN-017-002	WR	JUAN12	CORDIER, 2007	ICPAES	44.5	-130.4	50.0216	1.53532	10.8136	7.55772	14.6796	12.0349	2.35745	0.16839	0.16839	0.208011		12		12	45	288			6.1	4.5	1.2					3.9					2.5	12	91			1.7	43			107
NAUBLAN-017-003	WR	JUAN12	CORDIER, 2007	ICPAES	44.5	-130.4	50.4101	1.92182	11.8811	6.93264	13.825	11.4706	2.44504	0.201238	0.201238	0.2113		18		14.5	44	167			7.3	4.3	1.5		6.1			5					5.2	13.3	60			1.1	44	4.1		112
NAUBLAN-017-004	WR	JUAN12	CORDIER, 2007	ICPAES	44.5	-130.4	49.8179	1.85694	11.2854	7.26802	14.6758	11.531	2.38607	0.219638	0.219638	0.209654		20		17	43	285			7	4.8	1.5					5.8					4.6	15	88			2.5	41			121
NAUBLAN-017-005	WR	JUAN12	CORDIER, 2007	ICPAES	44.5	-130.4	50.4475	1.82897	11.6492	7.09481	13.9685	11.2552	2.60277	0.221085	0.190937	0.211035				14	45	113			6.8	3.9	1.5		5.3			5.1					5.8	12.6	59				44	4		127
NAUBLAN-017-006	WR	JUAN12	CORDIER, 2007	ICPAES	44.5	-130.4	50.4923	1.82696	11.7809	7.22753	13.7524	11.3432	2.48948	0.190726	0.200765	0.210803				14.5	43	168			7.1	4.3	1.5		5.8			5					5.2	13.3	73				43	4.2		109
NAUBLAN-017-007	WR	JUAN12	CORDIER, 2007	ICPAES	44.5	-130.4	51.0712	1.87998	11.8801	6.47438	13.7229	11.0587	2.62393	0.251335	0.251335	0.211121		20		19.7	41	178			9.5	5.6	1.9		7.8			6.7					5.8	18.2	58			1.4	43	5.4		107
NAUBLAN-017-008	WR	JUAN12	CORDIER, 2007	ICPAES	44.5	-130.4	50.264	1.76929	11.4723	6.99675	14.1242	11.8623	2.53331	0.150792	0.191003	0.211109		16		16.5	41	190			7.5	5.3	1.5					5.4					4.4	15	56			1.5	44			102
NAUBLAN-017-009	WR	JUAN12	CORDIER, 2007	ICPAES	44.5	-130.4	50.3975	1.70991	11.4294	7.03965	13.9993	11.8994	2.42988	0.18999	0.19999	0.219989				16	44	222			7.3	4.9	1.6					5.1					3.5	15	63				44			103
OCNGR68-006-VG183	GL	JUAN	Jenner and O'Neil, 2012	LA-ICP-MS	44.42	-129.92	50.18	2.28	13.51	6.12	13.62	11.06	2.72	0.16	0.14			19.6607	0.667216	16.6417	43.8393	85.4607	0.013126	57.2048	7.81792	4.97348	1.80515	19.4909	6.33306	3.75092	1.65692	5.51137	8.08578	0.657705	1717.73	0.768142	5.15572	14.2134	40.8356	0.669021	2.78885	1.96168	44.6006	5.01432	1.44734	117.547	0.310612	1.14183	0.297949
OCNGR68-006-VG186	GL	JUAN	Jenner and O'Neil, 2012	LA-ICP-MS	44.42	-129.92	50.55	2.11	12.8	6.34	13.82	11.12	2.62	0.16	0.21			20.6355	0.608302	15.8081	44.3338	118.856	0.0126937	62.9388	6.84243	4.2992	1.58248	19.7478	5.70358	3.27032	1.49464	5.19323	7.4179	0.604181	1725.09	0.727927	5.11334	13.5434	47.6004	0.546223	2.59889	1.86664	44.1134	4.68826	1.33501	112.404	0.296294	1.02085	0.307897
OCNGR68-006-VG187	GL	JUAN	Jenner and O'Neil, 2012	LA-ICP-MS	44.42	-129.92	50.17	2.33	12.99	6.21	13.48	10.96	2.69	0.18	0.17			20.4329	0.673701	16.9184	44.7978	88.352	0.0190242	58.0593	8.01954	4.8808	1.82313	20.3242	6.57436	3.838	1.72443	5.59994	8.09601	0.720405	1769.69	0.764466	5.23974	14.4605	41.234	0.649514	2.78138	1.96678	44.613	5.15607	1.43006	118.366	0.318485	1.15281	0.28477
OCNGR68-006-VG315	GL	JUAN	Jenner and O'Neil, 2012	LA-ICP-MS	44.42	-129.92	49.0774	1.48375	8.61745	7.67751	16.6013	11.4234	2.9715	0.606415	0.250067			107.934	0.88948	23.8798	40.3274	242.714	0.151439	70.8646	3.95434	2.40651	1.18487	17.0368	3.62508	2.58774	0.80765	10.7007	5.76213	0.304987	1256.43	1.2903	15.0943	13.288	109.71	1.04705	3.10182	11.0931	31.7521	3.42036	1.05246	253.4	0.814362	0.626564	1.27336
OCNGR68-005-VG180	GL	JUAN	Jenner and O'Neil, 2012	LA-ICP-MS	44.33	-129.92	50.01	2.74	14.67	5.63	13.31	10.5	2.8	0.26	0.22			27.2609	0.864349	22.1586	43.6482	117.94	0.0290144	50.5058	9.4498	5.86858	2.22234	21.5116	8.39129	4.88934	2.06029	7.61976	9.41931	0.893318	1870.16	0.995232	7.41474	18.9375	43.7385	0.713263	3.6305	2.76371	45.2532	6.39191	1.81868	118.28	0.462586	1.40704	0.452461
OCNGR68-005-VG388	GL	JUAN	Jenner and O'Neil, 2012	LA-ICP-MS	44.33	-129.92	50.627	3.01397	14.2453	5.87005	13.4815	11.1278	2.54	0.187693	0.258068			28.3403	0.918834	23.1699	45.6304	145.281	0.0253598	46.2146	9.66107	6.17432	2.12746	21.8092	8.29876	4.81134	2.03363	7.90848	9.42433	0.864747	1977.42	1.00631	7.61503	19.5577	49.2698	0.776361	3.77883	2.60819	44.2993	6.58	1.86966	116.057	0.465345	1.42335	0.48551
OCNGR68-005-VG389	GL	JUAN	Jenner and O'Neil, 2012	LA-ICP-MS	44.33	-129.92	51.0032	2.34629	12.5563	6.16718	13.5788	10.809	2.61873	0.182314	0.219816			19.4549	0.658458	17.5227	45.3297	94.6022	0.0189146	58.5864	7.75346	4.97976	1.74107	19.7715	6.37044	3.71512	1.6448	5.86843	7.99365	0.674193	1811.47	0.769466	5.34032	15.0408	46.8593	0.651167	2.84851	1.94465	45.0956	5.03282	1.4835	118.256	0.32399	1.16685	0.323867
OCNGR68-011-VG185	GL	JUAN	Jenner and O'Neil, 2012	LA-ICP-MS	44.33	-129.75	49.62	1.39	10.17	7.56	16.25	11.15	2.65	0.1	0.1			11.3349	0.4894	8.72176	43.5897	287.762	0.0121211	70.2142	4.00367	2.33224	1.11046	17.9488	3.27371	1.91087	0.829092	2.8233	4.73536	0.303511	1277.01	0.450758	2.43352	7.67339	114.213	0.46824	1.46284	1.04893	33.3261	2.65168	0.836907	158.409	0.141219	0.592794	0.135974
OCNGR68-012-VG184	GL	JUAN	Jenner and O'Neil, 2012	LA-ICP-MS	44.33	-129.83	50.82	1.95	12.08	6.71	14.11	11.77	2.69	0.13	0.14			11.6683	0.531111	12.666	42.8042	179.933	0.0110657	65.682	6.51273	3.87609	1.44108	18.8418	5.04535	2.99837	1.39089	4.00489	7.08049	0.57435	1621.75	0.593694	3.19167	11.3247	52.8342	0.525992	2.07008	1.07112	45.4599	4.11704	1.21922	109.86	0.198263	0.957922	0.177752
OCNGR68-002-VG178	GL	JUAN	Jenner and O'Neil, 2012	LA-ICP-MS	44.27	-129.75	49.69	2.25	11.3	7.18	14.66	10.54	2.95	0.32	0.25			43.756	0.838384	21.0372	43.0017	215.344	0.0437227	54.167	6.94755	3.98164	1.77377	19.7028	6.28343	3.88875	1.44384	7.89977	6.44786	0.57056	1508.01	0.995173	10.0675	16.0066	113.739	0.75825	3.23805	4.598	37.645	5.01586	1.49922	173.828	0.590725	1.05167	0.61902
OCNGR68-002-VG332	GL	JUAN	Jenner and O'Neil, 2012	LA-ICP-MS	44.27	-129.75	48.4805	1.28741	10.3509	8.21152	16.6294	10.9861	2.71736	0.113177	0.233506			16.7818	0.368583	8.6148	48.484	282.912	0.0159579	79.2962	4.06795	2.5754	1.04996	17.7562	3.44939	1.8408	0.873174	2.90104	4.98565	0.33497	1440.89		3.22816	7.51894	147.175	0.383222	1.38842	1.45459	35.2024	2.72355	0.815861	122.927	0.177478	0.59163	0.194889
OCNGR68-002-VG337	GL	JUAN	Jenner and O'Neil, 2012	LA-ICP-MS	44.27	-129.75	49.2491	1.96379	10.5194	7.08207	15.1787	11.1238	2.90004	0.24434	0.26101			34.7459	0.702631	16.9807	41.5481	247.242	0.0376082	61.4592	5.63353	3.34134	1.44456	19.1626	4.9914	2.97306	1.14555	6.19636	5.77978	0.462108	1511.85	0.787174	7.58308	12.946	86.3102	0.588065	2.48305	3.4033	38.4862	4.06605	1.28566	157.217	0.42309	0.83783	0.491815
OCNGR68-002-VG338	GL	JUAN	Jenner and O'Neil, 2012	LA-ICP-MS	44.27	-129.75	48.2097	1.71582	10.5517	7.91472	15.6687	11.1301	2.77136	0.182257	0.216345			23.146	0.546535	12.6678	48.3588	288.682	0.0223479	78.9241	4.80426	3.08566	1.29166	18.1424	4.06474	2.38875	1.07584	4.41213	5.13981	0.427555	1531.05	0.634562	5.09044	10.0776	138.242	0.456673	1.98809	2.14143	39.5641	3.3218	1.01838	148.599	0.295831	0.734203	0.282928
OCNGR68-002-VG339	GL	JUAN	Jenner and O'Neil, 2012	LA-ICP-MS	44.27	-129.75	48.814	1.75779	10.7264	8.04581	15.5869	10.9376	2.85916	0.200413	0.254092			27.783	0.622348	14.7199	48.9737	241.771	0.0285124	70.8798	5.22375	3.30494	1.40983	18.814	4.62021	2.7466	1.14572	5.2042	5.41026	0.444136	1575.27	0.734568	6.3423	11.5526	140.289	0.554703	2.18044	2.62024	38.8112	3.76913	1.18809	163.128	0.353722	0.800948	0.351271
OCNGR68-002-VG340	GL	JUAN	Jenner and O'Neil, 2012	LA-ICP-MS	44.27	-129.75	48.32	1.74	11.27	8.24	15.68	11.12	2.64	0.17	0.2			28.7466	0.6519	14.9473	48.8456	247.378	0.0303274	63.3492	5.69698	3.39372	1.42824	18.7488	4.96853	2.7891	1.18323	5.51071	5.11514	0.474513	1544.15	0.698872	6.45951	12.3626	139.956	0.594879	2.32707	2.74305	43.3118	4.11754	1.29282	165.808	0.378519	0.82487	0.364492
OCNGR68-002-VG341	GL	JUAN	Jenner and O'Neil, 2012	LA-ICP-MS	44.27	-129.75	48.101	1.8026	10.9278	8.17378	15.3856	10.8976	2.77105	0.203549	0.137711			29.0335	0.612345	14.8505	49.6383	243.421	0.0271998	71.5226	5.31166	3.16324	1.3584	18.877	4.73268	2.69145	1.095	5.35898	5.45481	0.443899	1570.68	0.740845	6.29336	11.6957	140.537	0.561454	2.31166	2.78035	39.2806	3.69469	1.16674	161	0.358842	0.839352	0.322182
OCNGR68-002-VG372	GL	JUAN	Jenner and O'Neil, 2012	LA-ICP-MS	44.27	-129.75	49.94	2.22	11.25	7.16	14.88	10.55	3.07	0.3	0.25			44.6289	0.854697	20.9768	46.0996	231.512	0.0615999	57.7693	6.47111	3.67818	1.66024	20.2556	6.01916	3.54351	1.31892	7.65172	6.59581	0.51551	1688.41	0.949513	9.85986	16.1774	114.087	0.731905	3.04291	4.66074	39.6875	4.98395	1.55795	173.039	0.542468	0.974581	0.535858
OCNGR68-002-VG373	GL	JUAN	Jenner and O'Neil, 2012	LA-ICP-MS	44.27	-129.75	48.24	0.84	10.37	8.67	17.54	11.49	2.48	0.07	0.1			8.07182	0.220966	4.68253	53.1817	252.002	0.0130347	102.393	3.06743	2.09298	0.657566	15.5835	2.26156	1.05729	0.670219	1.52922	4.00448	0.309422	1506.13	0.406359	1.75307	4.41097	169.832	0.213665	0.775975	0.749423	37.0824	1.49113	0.568799	90.8754	0.0968989	0.423666	0.104687
OCNGR68-002-VG374	GL	JUAN	Jenner and O'Neil, 2012	LA-ICP-MS	44.27	-129.75	49.74	2.17	10.75	7.18	14.94	10.51	3.07	0.28	0.22			44.7868	0.841146	21.0436	45.3204	239.094	0.0461301	58.7044	6.41338	3.74662	1.68521	19.9218	5.96966	3.54811	1.34846	7.76759	6.7188	0.506617	1645.77	1.01835	9.98671	15.6825	120.292	0.724461	3.16911	4.48156	39.1716	4.90418	1.58323	175.929	0.531045	0.993509	0.557972
OCNGR68-002-VG375	GL	JUAN	Jenner and O'Neil, 2012	LA-ICP-MS	44.27	-129.75	50.2	2.21	11.01	7.33	14.82	10.43	3.03	0.29	0.25			43.9625	0.859241	21.3393	45.0371	233.564	0.0609948	51.9286	6.87555	3.9122	1.77741	20.4511	5.87333	3.71226	1.35061	7.98486	6.81342	0.550563	1645.86	1.05249	10.196	16.1166	112.668	0.731279	3.23514	4.61223	39.5089	5.13801	1.66317	175.135	0.573367	1.03764	0.545007
OCNGR68-002-VG376	GL	JUAN	Jenner and O'Neil, 2012	LA-ICP-MS	44.27	-129.75	50.4	1.94	9.8	7.12	15.52	11.21	2.9	0.3	0.2			48.008	0.7623	18.5093	42.2367	259.676	0.0586463	65.9693	5.57971	3.25516	1.48197	19.1522	5.05591	3.0079	1.15502	7.1399	5.81973	0.4269	1488.24	0.886895	9.5026	13.7056	105.317	0.658364	2.74944	4.60256	38.7691	4.32653	1.39768	177.91	0.517996	0.861871	0.546848
OCNGR68-002-VG377	GL	JUAN	Jenner and O'Neil, 2012	LA-ICP-MS	44.27	-129.75	48.45	0.86	10.41	8.79	17.58	11.45	2.42	0.06	0.08			7.44545	0.213988	4.524	54.2738	252.3	bdl	102.192	3.12404	2.20346	0.67606	15.8569	2.27443	1.08362	0.714919	1.51933	3.84687	0.329293	1483.68	0.440166	1.77323	4.29184	173.051	0.223037	0.791872	0.690664	37.6457	1.63508	0.551557	89.6209	0.0882272	0.397797	0.090465
OCNGR68-002-VG378	GL	JUAN	Jenner and O'Neil, 2012	LA-ICP-MS	44.27	-129.75	49.67	2.59	11.55	6.8	14.56	9.99	3.16	0.4	0.31			61.4732	1.06844	26.9154	43.532	230.682	0.0709952	60.6869	7.97316	4.81354	2.01129	21.1333	7.35434	4.53779	1.69788	10.5613	7.7953	0.687378	1713.88	1.35356	14.3594	19.7146	107.606	0.926063	3.94812	7.05086	38.7258	6.26295	1.98278	157.387	0.792666	1.22337	0.903872
OCNGR68-002-VG380	GL	JUAN	Jenner and O'Neil, 2012	LA-ICP-MS	44.27	-129.75	49.41	2.31	11.52	7.53	14.92	10.54	2.88	0.3	0.22			43.9465	0.846296	21.1545	45.5645	219.165	0.05907	56.3638	6.66267	3.85696	1.70036	20.3238	5.69016	3.6273	1.37945	7.84453	6.42776	0.524284	1647.03	1.01642	10.0011	15.7634	119.093	0.752053	3.09908	4.4887	39.4648	4.80964	1.61527	169.905	0.560483	0.994005	0.567677
OCNGR68-002-VG381	GL	JUAN	Jenner and O'Neil, 2012	LA-ICP-MS	44.27	-129.75	49.82	2.28	11.43	7.25	15.11	10.61	2.94	0.3	0.22			42.6889	0.857626	20.8779	44.432	223.685	0.0537366	56.9102	6.5633	3.86864	1.69439	20.4341	5.71621	3.62575	1.3612	7.83792	6.59978	0.575402	1616.65	0.957996	9.78772	16.0516	105.713	0.766245	3.17094	4.33319	39.1132	5.00967	1.59095	172.71	0.557946	0.976828	0.537217
OCNGR68-002-VG382	GL	JUAN	Jenner and O'Neil, 2012	LA-ICP-MS	44.27	-129.75	50.4584	2.267	11.1994	7.3669	15.1413	10.2483	2.97479	0.296392	0.277819			46.4454	0.857223	21.7198	44.7288	239.586	0.0527199	57.1737	6.91092	4.06547	1.83064	20.5002	5.94206	3.57447	1.39177	8.06548	6.36891	0.532754	1627.74	1.03336	10.4699	16.0463	111.99	0.734911	3.29378	4.49758	39.3073	5.06862	1.55119	178.18	0.565762	0.975915	0.633527
OCNGR68-002-VG383	GL	JUAN	Jenner and O'Neil, 2012	LA-ICP-MS	44.27	-129.75	50.5765	2.37764	12.0065	7.64619	15.2434	10.5869	2.8	0.260198	0.232748			44.0872	0.882319	21.4642	44.9887	222.894	0.0553601	54.1546	6.72347	3.81782	1.78228	20.7054	5.78799	3.76006	1.35567	7.98263	6.45935	0.525035	1620.37	1.08767	9.97957	16.0914	116.995	0.775028	3.22944	4.44462	38.0337	5.02554	1.46309	170.498	0.56015	0.978035	0.618818
OCNGR68-002-VG384	GL	JUAN	Jenner and O'Neil, 2012	LA-ICP-MS	44.27	-129.75	50.004	2.33216	11.1538	6.81588	15.3974	10.4988	2.88768	0.349183	0.242279			56.5222	0.940732	23.0268	41.0972	231.536	0.0610439	58.5476	6.80031	4.13917	1.84905	19.6683	5.92917	3.82718	1.39624	9.0365	6.88525	0.539499	1561.9	1.1129	11.9991	16.4691	94.3624	0.775711	3.35012	5.87628	36.7067	5.16875	1.53012	177.857	0.672219	1.04282	0.743025
OCNGR68-002-VG385	GL	JUAN	Jenner and O'Neil, 2012	LA-ICP-MS	44.27	-129.75	49.0258	1.30836	10.6102	8.00537	16.6437	10.9729	2.61079	0.119667	0.114446			16.9951	0.399198	8.74731	48.7041	281.645	0.015831	78.0638	4.17344	2.61317	1.04054	18.4174	3.49416	1.84141	0.900994	3.01544	4.91366	0.357746	1461.55	0.560943	3.30973	7.55873	140.346	0.375479	1.40601	1.40812	36.306	2.64238	0.817981	125.861	0.200413	0.63323	0.177816
OCNGR68-002-VG386	GL	JUAN	Jenner and O'Neil, 2012	LA-ICP-MS	44.27	-129.75	50.3403	1.95439	10.3419	7.51252	15.509	11.216	2.47791	0.226493	0.15896			40.1756	0.681099	17.3118	43.0306	272.635	0.0390847	63.8036	5.44683	3.29582	1.43281	19.1115	4.67061	2.99603	1.15589	6.43459	5.48986	0.460809	1502.49	0.843462	7.90889	13.1649	105.796	0.608332	2.62098	3.43142	38.1729	3.95921	1.25309	167.702	0.450704	0.806125	0.55071
OCNGR68-002-VG387	GL	JUAN	Jenner and O'Neil, 2012	LA-ICP-MS	44.27	-129.75	50.6958	2.04649	11.306	7.80019	15.528	11.0072	2.81	0.207363	0.171812			39.0352	0.739177	18.1325	44.9571	259.021	0.0311638	58.595	5.82724	3.56079	1.69486	20.356	5.08551	3.27048	1.24238	6.69653	5.88866	0.434719	1582.87	0.913181	7.66758	14.0298	124.475	0.627691	2.76685	3.55857	39.0169	4.25748	1.32075	177.525	0.445036	0.900661	0.473188
OCNGR68-001-214	GL	JUAN	Jenner and O'Neil, 2012	LA-ICP-MS	44.25	-129.83	47.6961	1.61042	10.8868	7.79603	16.28	11.0036	2.75945	0.164341	0.297656			23.8459	0.502624	13.0502	47.6704	252.11	0.03254	83.5357	5.40191	3.34157	1.31311	18.1462	4.43047	2.53078	1.11707	4.55871	5.41592	0.459403	1566.5	0.708518	5.95683	10.1156	126.453	0.451088	1.93373	2.60767	38.6734	3.45789	1.09253	119.846	0.338892	0.763945	0.304578
OCNGR68-001-215	GL	JUAN	Jenner and O'Neil, 2012	LA-ICP-MS	44.25	-129.83	48.4257	2.24449	10.9806	7.49576	14.8076	10.5089	3.10817	0.278807	0.272407			42.1272	0.819657	20.6919	44.5442	235.034	0.047499	57.6077	6.49213	3.95881	1.73953	20.2306	5.72086	3.66017	1.33512	7.56221	6.42689	0.539947	1581.9	0.957817	9.6582	15.1165	114.943	0.678092	3.07521	4.52883	39.0199	4.88364	1.53495	171.59	0.561813	0.966377	0.519409
OCNGR68-001-216	GL	JUAN	Jenner and O'Neil, 2012	LA-ICP-MS	44.25	-129.83	48.4034	1.6209	10.8578	7.70735	16.3669	11.0521	2.72709	0.164107	0.183342			25.3939	0.550363	13.5846	48.453	253.186	0.0281573	82.66	5.32178	3.29679	1.26059	18.0314	4.43531	2.58433	1.1723	4.64102	5.40806	0.488156	1588.89	0.746242	6.05843	10.6343	126.859	0.469617	2.15826	2.77271	38.7399	3.55851	1.09283	122.791	0.345673	0.779188	0.299276
OCNGR68-001-217	GL	JUAN	Jenner and O'Neil, 2012	LA-ICP-MS	44.25	-129.83	50.2055	1.96268	10.6574	7.20009	15.6432	11.4159	2.62741	0.242819	0.260944			40.3939	0.752395	18.1004	43.6953	286.752	0.0396772	67.9857	5.76553	3.5395	1.57646	19.7179	5.27642	3.11934	1.21293	6.55923	5.98927	0.469499	1550.53	0.855969	8.13245	13.4444	98.2987	0.664413	2.68293	3.75422	40.2155	4.21134	1.33204	174.618	0.464526	0.852599	0.478087
OCNGR68-001-VG177	GL	JUAN	Jenner and O'Neil, 2012	LA-ICP-MS	44.25	-129.83	48.91	1.74	11.33	7.99	16.08	10.98	2.65	0.2	0.15			29.5869	0.61803	14.9363	49.2559	245.654	0.0330875	72.1668	5.56591	3.40058	1.51795	18.8349	4.831	2.80525	1.16841	5.32807	5.43298	0.45834	1503.38	0.738823	6.39365	11.6987	142.13	0.543972	2.36608	2.73875	39.2702	3.8565	1.17633	166.017	0.374481	0.832755	0.405462
OCNGR68-001-VG179	GL	JUAN	Jenner and O'Neil, 2012	LA-ICP-MS	44.25	-129.83	49.6	1.6	11.11	8.02	16.24	11.58	2.59	0.19	0.15			24.9836	0.569876	13.0416	47.5844	296.579	0.0317007	78.0353	4.97586	3.18071	1.33733	18.2318	4.27121	2.51721	1.06128	4.71289	5.09573	0.45971	1481.08	0.639769	5.31439	10.233	139.686	0.486997	1.97214	2.34786	41.3854	3.55012	1.05304	153.071	0.305323	0.757867	0.273968
YAQ1973-004-005	GL	JUAN	Jenner and O'Neil, 2012	LA-ICP-MS	44.18	-129.33	50.53	1.89	11.05	6.81	14.9	10.26	2.77	0.17	0.15			29.266	0.629874	14.605	43.0628	279.039	0.0391185	63.2928	5.79779	3.37754	1.48097	19.3763	4.92331	2.93064	1.21849	5.50225	5.643	0.453508	1537.79	0.754248	6.8069	11.6381	101.668	0.496358	2.23449	3.10734	37.0041	4.04037	1.25636	135.441	0.386431	0.882845	0.398216
YAQ1973-004-006	GL	JUAN	Jenner and O'Neil, 2012	LA-ICP-MS	44.18	-129.33	51.35	1.96	11.21	6.79	14.72	10.32	2.86	0.18	0.21			30.2333	0.662761	15.1335	43.6376	284.431	0.0311551	64.6541	6.06225	3.54245	1.50071	20.0466	5.15738	3.01181	1.26219	5.57722	6.00636	0.478369	1579.05	0.770357	6.92469	12.3045	101.727	0.536866	2.37679	3.04028	37.5716	4.18208	1.32126	139.413	0.386423	0.937616	0.439661
YAQ1973-004-008	GL	JUAN	Jenner and O'Neil, 2012	LA-ICP-MS	44.18	-129.33	50.25	1.98	11.07	7.07	15.15	10.36	2.82	0.2	0.18			29.882	0.648799	14.6778	42.6933	279.197	0.0288836	62.6869	5.89699	3.53156	1.46228	19.473	5.05641	2.98747	1.24332	5.46427	5.61486	0.473165	1519.47	0.722762	6.81297	11.7045	100.395	0.525866	2.25532	2.97729	36.8466	3.95787	1.29611	136.926	0.384825	0.885094	0.38964
YAQ1973-004-009	GL	JUAN	Jenner and O'Neil, 2012	LA-ICP-MS	44.18	-129.33	51.01	1.82	10.86	6.77	15.02	10.21	2.77	0.2	0.12			30.8778	0.652307	14.8497	43.5415	282.679	0.0351317	62.976	5.97749	3.46035	1.48349	19.3475	5.0048	3.04675	1.23492	5.50536	5.8521	0.46646	1552.8	0.779	6.87409	11.8673	105.681	0.499909	2.35007	3.01376	37.8157	3.89099	1.2528	137.995	0.381517	0.906499	0.415018
YAQ1973-004-015	GL	JUAN	Jenner and O'Neil, 2012	LA-ICP-MS	44.18	-129.33	50.43	1.92	11.04	7.09	14.72	10.4	2.8	0.19	0.16			30.3949	0.622876	14.8204	43.2323	273.756	0.0344379	58.1732	6.06111	3.46377	1.4539	19.5373	5.0416	3.01084	1.28667	5.43016	5.8854	0.471426	1533.45	0.777462	6.758	11.9158	104.689	0.562024	2.26374	2.94692	36.7902	4.13136	1.26024	137.881	0.396474	0.892922	0.392059
OCNGR68-003-VG390	GL	JUAN	Jenner and O'Neil, 2012	LA-ICP-MS	44.17	-130.42	49.5648	1.43386	9.74179	8.19009	16.3044	11.3271	2.76007	0.109038	0.112828			15.4195	0.489241	10.5208	45.5927	315.947	0.0176472	70.2997	4.36798	2.78563	1.27001	17.1696	3.62527	2.10352	0.953769	3.50191	4.9933	0.369061	1398.59	0.571217	3.26643	8.96479	135.314	0.411056	1.77726	1.45751	36.7003	3.13147	0.91783	143.862	0.194558	0.675223	0.16544
OCNGR68-003-VG391	GL	JUAN	Jenner and O'Neil, 2012	LA-ICP-MS	44.17	-130.42	49.7366	1.41635	9.70437	8.23447	16.3847	11.166	2.77279	0.114195	0.13297			14.5679	0.474497	10.3772	45.3113	315.87	bdl	65.778	4.35621	2.74981	1.16059	17.2439	3.69217	2.07552	0.93503	3.45039	5.32287	0.352115	1398.32	0.527287	3.26255	8.95888	136.959	0.41981	1.68068	1.35963	36.6799	3.07271	0.922391	145.062	0.187037	0.652812	0.171661
OCNGR68-015-005	GL	JUAN	Jenner and O'Neil, 2012	LA-ICP-MS	43.35	-127.52	49.3557	1.51212	8.81797	7.5961	16.713	11.3787	2.96858	0.633853	0.283011			112.26	0.881191	24.1322	40.8897	232.965	0.155548	74.8529	3.91082	2.19185	1.28414	17.3648	3.74375	2.64328	0.848736	10.8636	5.6349	0.328678	1263.87	1.34192	15.5144	13.5601	106.85	1.16894	3.1167	11.4555	31.4745	3.39706	1.0634	253.822	0.867914	0.643864	1.38702
OCNGR68-015-011	GL	JUAN	Jenner and O'Neil, 2012	LA-ICP-MS	43.35	-127.52	49.7132	1.47389	8.62779	7.6834	16.9011	11.4532	2.98086	0.610892	0.301069			105.347	0.825209	23.0745	40.1645	237.123	0.140737	73.4821	3.84594	2.30011	1.18028	17.0811	3.69089	2.52919	0.780843	10.4587	5.36416	0.313374	1231.67	1.31176	14.5192	12.8978	113.407	1.03672	2.92263	10.9794	30.8586	3.32546	1.03573	246.44	0.799741	0.601618	1.29516
OCNGR68-015-014	GL	JUAN	Jenner and O'Neil, 2012	LA-ICP-MS	43.35	-127.52	49.5303	1.46532	8.61613	7.70787	16.856	11.3926	2.90252	0.602025	0.284477			104.872	0.826635	22.9658	41.1074	243.067	0.143741	75.8152	3.77906	2.2093	1.19845	17.4004	3.61087	2.57424	0.805403	10.4543	5.40523	0.30524	1250.59	1.25395	14.474	12.6813	117.032	1.03747	2.88108	11.0076	31.3813	3.50286	1.10088	242.852	0.804283	0.586005	1.01566
OCNGR68-015-017	GL	JUAN	Jenner and O'Neil, 2012	LA-ICP-MS	43.35	-127.52	49.5308	1.52873	8.58647	7.57182	16.8579	11.3134	3.00705	0.643226	0.308125			116.677	0.846091	24.9409	40.6406	229.4	0.151559	74.5591	3.9607	2.28341	1.31831	17.6684	3.94513	2.68368	0.804779	11.2325	5.73251	0.328042	1254.44	1.38713	15.8016	13.6604	108.073	1.07469	3.09284	12.1873	31.533	3.67437	1.16178	257.349	0.842557	0.614948	1.2837
OCNGR68-015-018	GL	JUAN	Jenner and O'Neil, 2012	LA-ICP-MS	43.35	-127.52	48.7714	1.90113	9.08659	7.21833	16.8014	10.4716	3.41439	0.905665	0.410916			180.046	1.19817	34.893	39.082	198.647	0.215081	64.6899	4.4075	2.55431	1.53614	18.399	4.46403	3.3878	0.902907	16.1039	6.14375	0.328883	1263.24		23.4149	18.6007	105.905	1.46604	4.30435	16.7727	29.5272	4.55996	1.38339	357.805	1.27816	0.730546	1.66696
OCNGR68-015-VG323	GL	JUAN	Jenner and O'Neil, 2012	LA-ICP-MS	43.35	-127.52	49.382	1.5144	8.64657	7.62789	16.7158	11.3715	2.95429	0.611581	0.421961			111.041	0.841532	24.046	40.7293	236.053	0.156587	77.2722	3.90161	2.37257	1.25652	17.3415	3.64772	2.60294	0.809669	10.8193	5.6151	0.311494	1254.83	1.3304	15.1893	13.4063	108.462	1.09434	3.05794	11.3778	32.0609	3.53263	1.04488	247.512	0.814352	0.615586	1.11225
OCNGR68-014-046	GL	JUAN	Jenner and O'Neil, 2012	LA-ICP-MS	43.2	-127.48	50.1626	2.18887	10.9141	6.62184	14.4372	11.0226	2.96277	0.182184	0.290684			29.6212	0.761145	17.72	40.9536	238.871	0.0351965	61.4164	7.05794	4.28886	1.64364	19.4271	5.84482	3.44608	1.53251	6.24017	7.40064	0.59676	1633.24	0.710912	6.27785	14.186	71.1389	0.680302	2.75302	3.15267	43.5687	4.81937	1.51022	141.623	0.354452	1.0594	0.441971
OCNGR69-014-047	GL	JUAN	Jenner and O'Neil, 2012	LA-ICP-MS	43.2	-127.48	49.2163	1.5477	9.47356	8.07395	15.4902	11.697	2.61124	0.217247	0.24775			33.2023	0.505465	13.4613	43.6148	335.752	0.053035	77.4264	4.76931	3.11418	1.24818	17.5508	4.1799	2.38505	1.06864	4.91216	5.95703	0.408956	1438.91	0.605105	5.1889	10.2005	108.079	0.57951	2.01758	3.96486	39.3984	3.38082	1.05113	135.479	0.300656	0.708615	0.339479
WFL2002-RC13	GL	JUAN15	DAVIS, 2008	EMP; ICP-MS	42.979	-126.602	50.0659	1.51319	9.72824	8.33025	15.6482	11.2402	2.7285	0.110148	0.0901208	0.180242		20.6		12.42			0.02		6.07	3.72	1.3		5.25	2.81	1.3	4.58		0.58			4.17	10.88		0.47	2.09	2.01	37.8	3.91		119.1	0.26	0.93	0.25
WFL2002-RC11	GL	JUAN15	DAVIS, 2008	EMP; ICP-MS	42.948	-126.62	50.642	3.1033	14.5214	4.56608	13.0791	8.82733	3.40373	0.362253	0.503129	0.251565		51.2		31.12			0.07		12.66	7.76	2.53		11.16	6.74	2.7	11.56		1.19			10.41	25.97		1.06	5.09	5.37	38.6	8.73		120.2	0.63	1.98	0.67
WFL2002-RC9	GL	JUAN15	DAVIS, 2008	EMP; ICP-MS	42.913	-126.642	50.3932	1.66033	9.88762	7.86013	15.4807	11.2307	2.64374	0.129607	0.149547	0.169486		20.4		12.91			0.03		6.01	3.71	1.32		5.17	2.88	1.3	4.7		0.57			4.07	11.13		0.52	2.15	1.87	38.9	3.91		125.2	0.25	0.92	0.24
WFL2002-RC8	GL	JUAN15	DAVIS, 2008	EMP; ICP-MS	42.906	-126.65	50.901	1.37576	9.4397	7.67247	15.5342	11.4941	2.6998	0.140872	0.150935	0.181122		23.8		12.15			0.03		5.57	3.39	1.21		4.79	2.57	1.17	4.54		0.53			4.3	10.44		0.46	2	2.1	37.7	3.6		119.2	0.25	0.85	0.26
WFL2002-RC6	GL	JUAN15	DAVIS, 2008	EMP; ICP-MS	42.873	-126.668	51.1816	1.97746	11.1657	6.64971	14.0665	10.9218	2.93431	0.18937	0.21927	0.209303		20.2		10.48			0.02		5.18	3.17	1.14		4.43	2.29	1.1	3.92		0.5			3.79	9.09		0.39	1.76	1.85	38	3.25		119.8	0.23	0.79	0.23
WFL2002-RC4	GL	JUAN15	DAVIS, 2008	EMP; ICP-MS	42.843	-126.691	50.2351	1.46851	9.4726	8.09311	15.5712	11.6976	2.60729	0.129865	0.139855	0.189803		24.1		13.29			0.03		5.9	3.59	1.31		5.12	2.8	1.25	4.98		0.55			4.39	11.19		0.66	2.18	2.17	36	3.92		130.9	0.27	0.91	0.28
WFL2002-RC2	GL	JUAN15	DAVIS, 2008	EMP; ICP-MS	42.817	-126.702	50.7237	1.70967	9.8968	7.53157	15.1362	11.2379	2.78637	0.159339	0.22905	0.149381		20.4		12.7			0.03		5.75	3.53	1.28		4.96	2.75	1.23	4.65		0.55			4.11	10.9		0.48	2.11	1.89	38.9	3.8		128.8	0.25	0.88	0.24
WFL2000-RC13	GL	JUAN15	DAVIS, 2008	EMP; ICP-MS	42.782	-126.715	50.3116	1.67149	9.68104	7.95744	15.4792	11.3552	2.64519	0.139653	0.169579	0.179554		20.7		12.65			0.02		5.93	3.68	1.28		5.01	2.86	1.27	4.71		0.57			4.58	10.79		0.49	2.07	2.15	41.5	3.8		113.4	0.29	0.92	0.25
WFL2000-RC16	GL	JUAN15	DAVIS, 2008	EMP; ICP-MS	42.776	-126.726	50.1716	1.19091	8.65134	8.3185	16.0941	12.2277	2.72126	0.069908	0.0898818	0.15979		8.6		7.31			0.01		4.23	2.61	0.99		3.57	1.87	0.92	2.48		0.39				7.08		0.35	1.29		38.8	2.62		121.4		0.65
WFL2000-RC15	GL	JUAN15	DAVIS, 2008	EMP; ICP-MS	42.772	-126.734	50.8856	2.02008	10.4479	6.90311	14.6939	11.1575	2.85338	0.179548	0.219448	0.169573		33.4		15.34			0.04		6.58	4.14	1.43		5.67	3.26	1.4	5.98		0.64			6.32	12.68		0.55	2.5	3.3	44.2	4.35		132.7	0.39	1.02	0.36
ALV1407-001-B1-B	GL	JUAN15	Gale, 2013	ICP-MS	42.77	-126.77	50.584	1.31657	9.27506	8.1993	15.3569	11.8845	2.62189	0.100055	0.140078			16.538	0.59	9.529	41.4	344	0.01722	71.2	5.089	3.24883	1.101	15.81	4.08363	2.229	1.114	3.269		0.469			3.138	8.874	113.1	0.387	1.651	1.395	41.1	3.019		110.861	0.197	0.769	0.196
WFL2000-RC10	GL	JUAN15	DAVIS, 2008	EMP; ICP-MS	42.762	-126.731	50.3489	1.17011	8.54833	8.2442	16.1601	12.0966	2.76234	0.0798767	0.109831	0.159753		8.6		7.54			0.01		4.31	2.66	1		3.57	1.91	0.92	2.6		0.41			1.87	7.19		0.3	1.32	0.74	39.9	2.69		123.8	0.13	0.67
WFL2000-RC11	GL	JUAN15	DAVIS, 2008	EMP; ICP-MS	42.758	-126.742	50.0054	1.29185	8.65998	8.2454	16.3806	11.8662	2.6968	0.149603	0.129656	0.149603		39		11.84			0.04		4.69	2.9	1.12		4	2.25	0.98	4.85		0.45			5.82	9.29		0.38	1.85	3.53	39.2	3.13		143.4	0.34	0.72	0.35
LCH1988-83-D4-15	GL	JUAN15	DAVIS, 2008	EMP; ICP-MS	42.757	-126.762	49.3648	0.970484	8.15122	9.54106	16.9049	11.8198	2.73658	0.0401724	0.0602586	0.150646		5.9		6.02					4.11	2.54	0.95		3.43	1.72	0.89	1.95		0.38			1.14	6.34		0.33	1.13	0.51	39	2.46		106.4	0.08	0.62	0.07
SCL771-R1	GL	JUAN15	DAVIS, 2008	EMP; ICP-MS	42.757	-126.742	49.7802	1.28142	8.73952	8.21327	16.4081	11.9928	2.68602	0.159555	0.13961	0.159555		40.7		11.35			0.04		4.51	2.79	1.08		3.87	2.11	0.97	4.66		0.42			5.64	8.87		0.45	1.78	3.68	38.2	3.02		140.7	0.33	0.69	0.33
SCL771-R3	GL	JUAN15	DAVIS, 2008	EMP; ICP-MS	42.757	-126.742	49.8964	1.29186	8.67011	8.23511	16.4104	11.9254	2.69682	0.149604	0.13963	0.159577		40.1		11.31			0.04		4.54	2.79	1.08		3.93	2.13	0.97	4.65		0.42			5.6	8.85		0.45	1.78	3.61	37.7	3.01		140.8	0.33	0.7	0.33
WFL2000-185-R2	GL	JUAN15	DAVIS, 2008	EMP; ICP-MS	42.756	-126.745	50.6597	1.53881	9.4022	7.78492	15.406	11.6559	2.69836	0.129731	0.149689	0.179627		17.8		11.18			0.02		5.63	3.5	1.18		4.59	2.61	1.2	4.02		0.54				9.65		0.44	1.87	1.83	40.7	3.49		117.4		0.85	0.14
WFL2002-456-R9	WR	JUAN15	DAVIS, 2008	XRF; ICP-MS	42.756	-126.711	50.3755	1.41804	8.70965	8.31557	15.3419	12.0508	2.96371	0.129945	0.129945	0.169928				9.21		338	0.01	71	5.18	3.12	1.2	18	4.41	2.34	1.11	3		0.48			1.78	9.11	83	0.37	1.66		45.1	3.32		124.4	0.13	0.8	0.11
WFL2005-884-R4	GL	JUAN15	DAVIS, 2008	EMP; ICP-MS	42.756	-126.711	50.8884	1.41567	9.13493	7.81033	15.2778	11.9197	2.8964	0.0703633	0.110571	0.170882		8		9.37			0.01		5.24	3.2	1.21		4.46	2.36	1.13	3		0.49			1.81	9.07		0.41	1.68	0.86	45.1	3.37		123.7	0.12	0.81	0.11
WFL2000-186-R1	GL	JUAN15	DAVIS, 2008	EMP; ICP-MS	42.755	-126.71	50.8237	1.47856	9.18813	7.62623	15.2406	11.9823	2.951	0.0799047	0.139833	0.169798		7.9		9.38			0.01		5.27	3.26	1.19		4.43	2.46	1.12	2.97		0.49			1.8	8.88		0.4	1.69	0.81	42.6	3.34		126.8	0.13	0.8
WFL2000-185-R1	GL	JUAN15	DAVIS, 2008	EMP; ICP-MS	42.754	-126.747	50.5375	1.80507	10.2883	7.37982	14.9947	11.2286	2.81224	0.149651	0.189558	0.189558		23.2		13.76			0.03		6.46	4.03	1.36		5.38	3.19	1.39	5		0.61			4.86	11.65		0.5	2.28	2.42	40.8	4.12		120.7	0.32	0.99	0.22
WFL2002-454-R2	GL	JUAN15	DAVIS, 2008	EMP; ICP-MS	42.754	-126.71	50.358	1.4833	9.14398	7.91753	15.6399	11.8394	2.92967	0.0796084	0.119413	0.169168		17.4		10.82					5.28	3.21	1.22		4.51	2.42	1.15	3.79		0.48			2.54	9.8			1.84	1.62	39.2	3.43		129.5	0.16	0.81	0.28
WFL2002-454-R5	GL	JUAN15	DAVIS, 2008	EMP; ICP-MS	42.754	-126.709	50.3555	1.49493	9.15252	7.87333	15.6347	11.8111	2.9844	0.0896431	0.119524	0.149405		13.4		10.22		333		72	5.37	3.29	1.24	16	4.65	2.46	1.16	3.44		0.49			2.33	9.62	90	0.53	1.79	1.27	39.3	3.48		127.6	0.15	0.83	0.18
WFL2002-454-R6	WR	JUAN15	DAVIS, 2008	XRF; ICP-MS	42.754	-126.709	50.2166	1.4463	8.76488	8.35251	15.5631	11.9012	2.90637	0.139693	0.129715	0.169627				9.92		327		69	5.26	3.18	1.21	17	4.56	2.41	1.11	3.31		0.49			2.31	9.34	92	0.39	1.74		42.4	3.43		130.5	0.16	0.8	0.14
WFL2002-456-R4	WR	JUAN15	DAVIS, 2008	XRF; ICP-MS	42.754	-126.711	50.1913	1.46276	8.56898	8.31542	15.6294	12.0311	2.95013	0.140288	0.130267	0.170349		11.3		10.04		332	0.01	67	5.37	3.2	1.22	16	4.58	2.48	1.12	3.33		0.49			2.32	9.57	92	0.41	1.78	1.2	43	3.42		129.9	0.16	0.82	0.13
WFL2002-456-R6	WR	JUAN15	DAVIS, 2008	XRF; ICP-MS	42.754	-126.71	50.1579	1.44489	8.67566	8.42701	15.5977	11.9093	2.91395	0.149525	0.129589	0.169462				9.71		331		64	5.08	3.02	1.18	16	4.38	2.38	1.09	3.24		0.47			2.29	9.22	96	0.39	1.7		42.7	3.31		128.6	0.16	0.79	0.14
WFL2002-456-R7	WR	JUAN15	DAVIS, 2008	XRF; ICP-MS	42.754	-126.71	50.2135	1.45733	8.76954	8.22249	15.5813	11.9174	2.93918	0.159734	0.129784	0.169717				9.97		330		61	5.27	3.21	1.22	16	4.5	2.47	1.12	3.31		0.48			2.33	9.44	84	0.38	1.74		42.6	3.44		131.7	0.16	0.82	0.13
WFL2002-456-R8	WR	JUAN15	DAVIS, 2008	XRF; ICP-MS	42.754	-126.71	50.1549	1.46039	8.55559	8.27477	15.6731	11.9768	2.8729	0.208622	0.139081	0.168884				10.13		332		69	5.4	3.26	1.24	16	4.57	2.46	1.14	3.39		0.49			2.39	9.69	90	0.4	1.79		43.1	3.5		133.1	0.16	0.83	0.13
WFL2000-RC17	GL	JUAN15	DAVIS, 2008	EMP; ICP-MS	42.753	-126.743	49.6887	1.30187	8.88042	8.24391	16.4074	11.9035	2.67549	0.159548	0.129632	0.169519		45.2		12.08			0.05		4.65	2.89	1.1		3.93	2.24	1	4.97		0.44			6.14	9.08		0.43	1.88	4.01	35.7	3.07		143.4	0.38	0.73	0.33
WFL2002-454-R7	WR	JUAN15	DAVIS, 2008	XRF; ICP-MS	42.753	-126.708	50.2985	1.44011	8.54642	8.35796	15.6153	11.9092	2.93543	0.158966	0.12916	0.168902				9.87		333		69	5.2	3.14	1.22	18	4.51	2.43	1.11	3.31		0.48			2.35	9.34	92	0.37	1.73		43.4	3.37		130	0.17	0.81	0.14
WFL2002-454-R8	GL	JUAN15	DAVIS, 2008	EMP; ICP-MS	42.753	-126.707	50.3946	1.47154	9.21495	7.8681	15.4752	11.9254	2.94738	0.0894663	0.109348	0.168992		11.8		9.99		327		70	5.33	3.22	1.23	14	4.59	2.42	1.14	3.32		0.49			2.27	9.55	92	0.46	1.76	1.22	40.6	3.43		128.1	0.16	0.81	0.15
WFL2002-454-R9	GL	JUAN15	DAVIS, 2008	EMP; ICP-MS	42.753	-126.706	50.4297	1.46406	9.23224	7.79001	15.5736	11.8789	2.95291	0.0796748	0.119512	0.15935		11.9		9.97		325		69	5.38	3.22	1.21	17	4.58	2.44	1.15	3.32		0.48			2.29	9.46	90	0.51	1.75	1.19	40.3	3.42		126.8	0.16	0.82	0.15
WFL2002-454-R10	GL	JUAN15	DAVIS, 2008	EMP; ICP-MS	42.752	-126.701	50.381	1.49275	9.28009	7.75882	15.5723	11.8627	2.95928	0.0895124	0.109404	0.159133		11.3		10.01					5.34	3.25	1.22		4.58	2.45	1.17	3.36		0.49			2.28	9.62		0.43	1.76	1.16	41.2	3.47		127.5	0.15	0.83	0.14
WFL2002-454-R11	WR	JUAN15	DAVIS, 2008	XRF; ICP-MS	42.751	-126.696	50.6318	1.41353	9.16178	8.29765	14.9049	12.13	2.59863	0.140514	0.130478	0.180661		15.4		9.51		220	0.01	67	5.2	3.22	1.14	17	4.29	2.22	1.11	3.41		0.5			3.03	8.68	71	0.37	1.61	1.53	45.7	3.24		107.4	0.2	0.8	0.17
WFL2000-RC1	GL	JUAN15	DAVIS, 2008	EMP; ICP-MS	42.75	-126.745	50.4428	1.82538	10.3276	7.3997	15.0626	11.2176	2.78069	0.149635	0.169586	0.199513		21.8		13.97			0.03		6.65	4.12	1.42		5.73	3.27	1.43	5.23		0.65			4.85	12.25		0.49	2.34	2.35	40.4	4.33		116.1	0.32	1.04	0.27
WFL2000-RC2	GL	JUAN15	DAVIS, 2008	EMP; ICP-MS	42.75	-126.742	50.049	1.50818	10.2212	7.85806	15.0397	12.042	2.42772	0.129743	0.129743	0.199605		27.5		17.15			0.04		7.81	4.81	1.61		6.46	3.79	1.64	6.51		0.76			6.24	14.34		0.7	2.91	2.96	43.6	5.08		120.1	0.45	1.19
WFL2002-454-R13	GL	JUAN15	DAVIS, 2008; SALTERS, 2011	CALC; ICPMS; MC-ICP-MS; XRF	42.749	-126.688	50.9189	1.29794	8.86302	7.8067	15.6294	12.0311	2.77227	0.0801641	0.100205	0.180369		7.8		9.09		342	0.01	67	4.71	2.88	1.11	14	4.02	2.18	1.02	3.04		0.44			1.86	8.52	92	0.48	1.6	0.81	40.7	3.08		135.4	0.12	0.73	0.11
WFL2002-454-R12	GL	JUAN15	DAVIS, 2008	EMP; ICP-MS	42.748	-126.69	50.1437	1.52162	9.64112	7.75996	15.5836	11.721	2.84171	0.119209	0.119209	0.16888		15.1		11.37			0.02		5.37	3.35	1.22		4.66	2.52	1.17	4.02		0.5			3.19	10.02		0.83	1.9	1.52	40	3.52		135.3	0.2	0.84	0.19
WFL2002-454-R14	GL	JUAN15	DAVIS, 2008	EMP; ICP-MS	42.746	-126.686	50.8676	1.45156	9.56698	7.48027	15.2706	11.9841	2.60329	0.110158	0.120172	0.180258		15.1		10.53			0.02		5.51	3.44	1.23		4.69	2.51	1.21	3.73		0.52			3.07	9.65		0.45	1.79	1.53	41.1	3.5		117.2	0.19	0.84	0.18
WFL2000-RC18	GL	JUAN15	DAVIS, 2008	EMP; ICP-MS	42.743	-126.747	49.5672	1.32204	8.90847	8.20054	16.3834	11.9991	2.69564	0.169477	0.139569	0.159508		42.9		11.83			0.04		4.63	2.88	1.1		3.91	2.18	0.98	4.84		0.44			5.95	9.02		0.45	1.85	3.85	37.6	3.07		141.6	0.36	0.71	0.32
WFL2000-RC4	GL	JUAN15	DAVIS, 2008	EMP; ICP-MS	42.733	-126.754	49.9755	1.3021	8.81136	8.39004	16.1918	11.9352	2.5302	0.149603	0.119682	0.16955		34.1		10.82			0.03		4.57	2.88	1.06		3.86	2.15	0.97	4.41		0.44			4.98	8.75		0.37	1.71	2.92	37.4	2.98		129.1	0.3	0.7	0.31
WFL2000-RC14	GL	JUAN15	DAVIS, 2008	EMP; ICP-MS	42.719	-126.762	50.076	1.2206	8.62323	8.31089	16.2881	11.9896	2.68752	0.12971	0.119733	0.159644		30.6		10.07			0.03		4.23	2.65	1.05		3.66	2.04	0.9	4.08		0.41			4.57	8.2		0.38	1.61	2.61	39.8	2.84		139.5	0.28	0.66	0.26
WFL2000-RC5	GL	JUAN15	DAVIS, 2008	EMP; ICP-MS	42.709	-126.772	50.3779	1.67204	9.93669	7.50521	15.2955	11.5563	2.80233	0.129721	0.149678	0.179613		19.7		11.53			0.03		5.65	3.51	1.27		4.74	2.67	1.21	4.32		0.54			4.17	10.2		0.39	1.95	2.05	41.5	3.61		118.8	0.26	0.88	0.22
WFL2000-RC12	GL	JUAN15	DAVIS, 2008	EMP; ICP-MS	42.701	-126.768	50.9151	1.9179	10.4398	7.08013	14.8457	10.9524	2.88517	0.149652	0.199536	0.189559		23.3		14.91			0.03		6.78	4.28	1.46		5.67	3.41	1.44	5.55		0.67			5.2	12.75		0.54	2.49	2.42	45	4.42		128.4	0.34	1.05	0.28
WFL2005-885-R4	GL	JUAN15	DAVIS, 2008	EMP; ICP-MS	42.687	-126.779	50.8333	1.31375	8.86114	7.84041	15.5229	11.938	2.9811	0.0998412	0.119809	0.139778		6.9		8.64			0.01		4.14	2.55	1		3.55	1.92	0.89	3.02		0.39			1.85	7.67		0.38	1.46	0.6	38.6	2.67		159.6	0.12	0.63	0.11
WFL2005-885-R3	GL	JUAN15	DAVIS, 2008	EMP; ICP-MS	42.686	-126.781	50.5964	1.17966	8.45226	8.19785	16.1403	11.8228	2.90651	0.0898069	0.119742	0.159657		6.1		8.32			0.01		3.99	2.43	0.97		3.43	1.84	0.84	2.91		0.38			1.76	7.31		0.31	1.42	0.51	36.6	2.57		161.6	0.12	0.61	0.1
WFL2000-RC9	GL	JUAN15	DAVIS, 2008	EMP; ICP-MS	42.685	-126.771	50.9584	2.05057	10.9512	6.76789	14.4734	10.8799	2.90507	0.169551	0.209446	0.179525		24.3		16.03			0.03		7.17	4.48	1.52		6.07	3.63	1.53	5.98		0.7			5.59	13.59		0.56	2.65	2.61	44.9	4.66		129.2	0.36	1.12	0.31
WFL2005-885-R12	GL	JUAN15	DAVIS, 2008	EMP; ICP-MS	42.684	-126.779	50.2027	1.6279	9.83714	7.77982	15.5342	11.2782	2.79699	0.169312	0.169312	0.149393		14		10.23			0.02		4.99	3.07	1.13		4.26	2.3	1.08	3.69		0.48			3.1	8.98		0.36	1.74	1.35	43.2	3.18		130.2	0.19	0.77	0.17
WFL2005-886-R3	GL	JUAN15	DAVIS, 2008	EMP; ICP-MS	42.675	-126.781	51.2189	1.5864	9.7353	7.28777	14.8112	11.6448	2.82463	0.14029	0.170352	0.170352		15.8		10.75			0.02		5.18	3.18	1.15		4.39	2.44	1.1	3.92		0.5			3.4	9.3		0.38	1.79	1.51	41.8	3.35		130.4	0.21	0.79	0.2
WFL2005-886-R10	GL	JUAN15	DAVIS, 2008	EMP; ICP-MS	42.67	-126.783	50.0922	1.17178	8.4593	8.52525	16.1432	12.2226	2.51574	0.159981	0.119986	0.149982		28.2		9.89			0.03		3.98	2.41	0.95		3.48	1.82	0.84	4.06		0.37			4.48	7.69		0.33	1.55	2.3	37.9	2.6		142.9	0.26	0.61	0.26
WFL2000-RC8	GL	JUAN15	DAVIS, 2008	EMP; ICP-MS	42.666	-126.777	50.4216	1.22055	8.82485	8.08318	15.8304	12.1076	2.69784	0.129706	0.119728	0.169615		25.3		9.67			0.03		4.37	2.75	1.06		3.84	2.06	0.92	3.79		0.42			3.88	8.22		0.45	1.6	2.17	42.2	2.86		140	0.24	0.68	0.21
WFL2000-RC7	GL	JUAN15	DAVIS, 2008	EMP; ICP-MS	42.65	-126.783	49.7197	1.23014	9.15311	8.55404	16.2092	11.7657	2.5194	0.139608	0.109692	0.189467		25.9		10.07			0.03		4.22	2.67	1.03		3.69	2.01	0.91	4.19		0.4			4.34	8.2			1.61	2.07	40.6	2.78		157.5	0.28	0.67	0.25
WFL2000-RC6	GL	JUAN15	DAVIS, 2008	EMP; ICP-MS	42.64	-126.794	51.1625	1.36458	9.05996	7.56875	15.0998	12.0423	2.92792	0.109786	0.119766	0.179649		6.9		9.39			0.01		4.53	2.84	1.11		3.86	2.19	0.97	3.24		0.43				8.52		0.4	1.62		42	2.98		157.1		0.71
WFL2000-187-R12	GL	JUAN15	DAVIS, 2008	EMP; ICP-MS	42.62	-126.807	49.3891	1.14852	9.34801	8.55693	16.4431	11.9966	2.35362	0.129679	0.0997534	0.139655		21.8		8.43			0.02		3.67	2.3	0.89		3.1	1.66	0.79	3.33		0.35			3.58	6.79		0.27	1.35	1.96	36.4	2.41		120	0.24	0.58	0.19
WFL2000-187-R15	GL	JUAN15	DAVIS, 2008	ICP-MS	42.62	-126.807												21.9		10.81			0.03		4.93	3.06	1.13		4.19	2.26	1.06	4.05		0.46			4.02	9.06		0.38	1.77	2.25	39.7	3.17		121.8	0.26	0.76	0.21
WFL2000-187-R13	GL	JUAN15	DAVIS, 2008	EMP; ICP-MS	42.619	-126.806	49.4719	1.16911	9.41932	8.55751	16.3449	11.879	2.3642	0.129688	0.0997602	0.169592		22.5		8.42			0.03		3.65	2.29	0.89		3.15	1.64	0.78	3.34		0.35			3.64	6.8		0.3	1.32	2.13	36.3	2.38		122.9	0.24	0.57	0.21
WFL2000-187-R14	GL	JUAN15	DAVIS, 2008	EMP; ICP-MS	42.619	-126.802	50.2105	1.15895	8.84458	8.63055	15.7699	12.3141	2.31231	0.119722	0.0997683	0.159629		19.4		8.67			0.02		4.09	2.57	0.94		3.36	1.78	0.87	3.29		0.4			3.3	7.35		0.32	1.39	1.89	40.5	2.57		113.8	0.22	0.62	0.18
WFL2000-187-R10	GL	JUAN15	DAVIS, 2008	EMP; ICP-MS	42.618	-126.812	50.6073	1.33487	9.2694	8.01979	15.3606	12.131	2.61743	0.0799083	0.109874	0.149828		9.7		7.64			0.01		4.52	2.84	0.99		3.74	1.94	0.98	2.6		0.44			2.06	7.21		0.31	1.33	0.95	42.3	2.69		110.6		0.69
WFL2000-187-R11	GL	JUAN15	DAVIS, 2008	EMP; ICP-MS	42.618	-126.809	49.8384	1.32134	9.07518	8.07232	15.8984	12.0716	2.70462	0.199279	0.139495	0.179351		14.8		8.18			0.02		4.49	2.81	1		3.62	1.89	0.95	2.96		0.43			2.58	7.38		0.27	1.38	1.38	41.5	2.69		103	0.18	0.68	0.15
WFL2000-187-R17	GL	JUAN15	DAVIS, 2008	EMP; ICP-MS	42.617	-126.795	49.6321	1.25119	9.40949	8.53708	16.2063	11.6919	2.458	0.129692	0.119716	0.169597		22		9.6			0.02		4.36	2.71	1.02		3.6	1.96	0.92	3.7		0.41			3.93	7.92		0.32	1.54	2.16	36.6	2.81		123.8	0.24	0.68	0.21
WFL2000-187-R16	GL	JUAN15	DAVIS, 2008	EMP; ICP-MS	42.616	-126.797	49.5705	1.24063	9.49807	8.59703	16.2222	11.6102	2.45741	0.129661	0.119687	0.159582		22.1		9.6			0.02		4.3	2.72	1		3.65	1.96	0.91	3.71		0.41			3.93	7.95		0.3	1.55	2.2	37.6	2.79		124.8	0.25	0.67	0.21
WFL2000-187-R8	GL	JUAN15	DAVIS, 2008	EMP; ICP-MS	42.615	-126.813	51.5222	1.19021	9.37346	7.80689	14.8519	12.1316	2.34452	0.119771	0.10979	0.169676		21.2		8.83			0.02		4.11	2.62	0.92		3.31	1.82	0.88	3.38		0.41				7.26		0.32	1.42	1.9	45.5	2.51		118.4		0.62	0.13
WFL2000-187-R9	GL	JUAN15	DAVIS, 2008	EMP; ICP-MS	42.615	-126.813	51.4096	1.14953	9.24512	7.87146	15.0058	12.2047	2.32443	0.11981	0.109826	0.179715		21		8.78			0.02		4.07	2.6	0.92		3.22	1.81	0.87	3.37		0.42				7.15		0.31	1.4	1.89	45.3	2.49		117.6		0.61	0.13
WFL2000-187-R7	GL	JUAN15	DAVIS, 2008	EMP; ICP-MS	42.611	-126.816	51.4273	1.15953	9.21264	7.78688	15.0222	12.2117	2.36557	0.129763	0.119782	0.169691		21.1		8.84			0.02		4.12	2.61	0.92		3.27	1.81	0.9	3.4		0.41				7.14		0.31	1.41	1.88	45.4	2.46		118.4		0.62	0.13
WFL2000-187-R6	GL	JUAN15	DAVIS, 2008	EMP; ICP-MS	42.61	-126.818	51.6226	1.20003	9.42054	7.72136	14.8862	12.0187	2.29159	0.119728	0.129705	0.209524		21.4		8.87			0.02		4.09	2.62	0.92		3.32	1.81	0.88	3.4		0.41				7.24		0.33	1.42	1.93	45	2.5		118.8		0.62	0.13
WFL2000-187-R1	GL	JUAN15	DAVIS, 2008	EMP; ICP-MS	42.605	-126.815	50.1869	1.20083	8.87114	8.46092	15.8409	12.323	2.38693	0.0998399	0.109824	0.169728		14.4		8.21			0.02		4.47	2.85	0.98		3.69	2	0.96	2.94		0.44				7.35		0.3	1.4	1.36	41.3	2.69		110.3		0.68	0.08
WFL2000-187-R5	GL	JUAN15	DAVIS, 2008	EMP; ICP-MS	42.603	-126.82	50.265	1.139	8.5863	8.56242	15.9169	12.3893	2.39682	0.109799	0.0998174	0.16969		17.9		8.24			0.02		4.14	2.57	0.94		3.31	1.82	0.89	3.09		0.4			3.2	6.98		0.29	1.36	1.61	41.5	2.52		119.2	0.2	0.62
WFL2000-187-R2	GL	JUAN15	DAVIS, 2008	EMP; ICP-MS	42.602	-126.818	50.4503	1.21098	8.95111	8.43942	15.6504	12.2329	2.35544	0.0998303	0.109813	0.149746		15.9		8.3			0.02		4.47	2.78	0.97		3.63	1.91	0.95	3.04		0.43				7.27		0.32	1.4	1.46	40.4	2.67		112.8		0.69	0.11
WFL2000-187-R3	GL	JUAN15	DAVIS, 2008	EMP; ICP-MS	42.601	-126.818	50.7136	1.25142	8.90635	8.32159	15.7024	12.0098	2.38554	0.0997816	0.10976	0.149672		14.5		8.17			0.02		4.48	2.82	0.99		3.7	1.97	0.97	2.95		0.43				7.28		0.29	1.4	1.37	40.3	2.66		111.7		0.67	0.08
WFL2000-187-R4	GL	JUAN15	DAVIS, 2008	EMP; ICP-MS	42.601	-126.819	50.4303	1.21098	8.94099	8.38769	15.72	12.1835	2.39712	0.0998301	0.119796	0.159728		14.6		8.09			0.02		4.41	2.81	0.97		3.58	1.95	0.95	2.92		0.43				7.17		0.3	1.38	1.39	41.9	2.69		110.2		0.67	0.08
WFL2002-455-R1	GL	JUAN15	DAVIS, 2008	EMP; ICP-MS	42.516	-126.866	50.3444	1.31292	8.94641	8.42465	15.9602	11.8318	2.38545	0.129711	0.109756	0.159645		18.8		9.99		342	0.02	68	4.8	2.91	1.09	17	4.11	2.11	1.03	3.81		0.45			3.86	8.53	134	0.37	1.65	1.88	39.5	3.1		118.2	0.25	0.74	0.22
WFL2002-455-R2	GL	JUAN15	DAVIS, 2008; SALTERS, 2011	EMP; ICP-MS	42.515	-126.877	50.6782	1.46185	9.66831	7.55288	15.2906	11.9444	2.71829	0.0901289	0.100143	0.160229		11.4		8.49			0.01		4.99	3.02	1.15		4.24	2.19	1.05	2.91		0.47			2.33	8.19		0.34	1.5	1.06	41.2	3.15		111.7	0.15	0.76	0.15
WFL2002-455-R3	GL	JUAN15	DAVIS, 2008	EMP; ICP-MS	42.512	-126.878	50.7376	2.22016	11.7375	6.36012	14.1212	11.1049	2.70357	0.169975	0.189972	0.199971		22.9		14.56			0.03		6.95	4.38	1.48		5.95	3.29	1.53	5.39		0.66			5.14	12.73		0.55	2.45	2.55	42.6	4.52		118	0.31	1.07	0.31
WFL2002-455-R5	GL	JUAN15	DAVIS, 2008	EMP; ICP-MS	42.511	-126.88	50.5083	1.92627	10.359	7.44494	15.1191	11.0994	2.55977	0.16944	0.179407	0.179407		24.5		15.9		311	0.04	58	7.06	4.37	1.51	17	6.11	3.55	1.54	5.79		0.67			5.24	13.61	132	0.61	2.64	2.66	42.8	4.72		123.8	0.32	1.09	0.31
WFL2002-455-R6	GL	JUAN15	DAVIS, 2008; SALTERS, 2011	CALC; ICPMS; MC-ICP-MS; XRF	42.506	-126.88	50.3616	1.84802	10.3192	7.58409	15.2291	10.9045	2.6692	0.209729	0.179768	0.179768		33.2		16.95		307	0.04	55	6.9	4.29	1.48	16	6.09	3.47	1.5	6.56		0.66			6.92	13.79	141	0.59	2.7	3.51	41.5	4.67		137.4	0.4	1.07	0.4
WFL2002-455-R7	WR	JUAN15	DAVIS, 2008	XRF; ICP-MS	42.503	-126.883	50.0282	1.90141	9.38941	8.72131	15.0066	11.1239	2.72427	0.209956	0.209956	0.169965		25.1		15.85		313	0.02	54	7.04	4.32	1.5	19	6.19	3.56	1.51	5.79		0.67			5.23	13.6	145	0.56	2.61	2.42	41.8	4.68		125.6	0.35	1.08	0.3
WFL2002-455-R8	WR	JUAN15	DAVIS, 2008	XRF; ICP-MS	42.492	-126.889	49.6176	1.3636	8.92228	8.73091	16.2413	11.8956	2.51976	0.0797871	0.129654	0.179521		9.8		9.06		335	0.01	57	5.21	3.16	1.12	14	4.28	2.29	1.1	3.06		0.5			2.03	8.71	129	0.35	1.6	0.98	38.9	3.23		109.8	0.14	0.8	0.11
WFL2002-455-R9	WR	JUAN15	DAVIS, 2008	XRF; ICP-MS	42.4914	-126.89	49.6235	1.37815	8.78819	8.72712	16.302	11.9427	2.53808	0.0800367	0.13006	0.170078		9.1		9.12		341		58	5.22	3.22	1.14	16	4.44	2.32	1.11	3.04		0.49			2.01	8.82	128	0.36	1.6	0.94	38.6	3.21		111.1	0.14	0.79	0.11
WFL2002-455-R10	WR	JUAN15	DAVIS, 2008	XRF; ICP-MS	42.491	-126.891	49.816	1.34112	8.6324	8.88911	16.1922	11.9794	2.4935	0.0702474	0.120424	0.160565		8.3		8.55		356		56	5	3.05	1.07	18	4.21	2.22	1.05	2.83		0.48			1.87	8.29	131	0.33	1.53	0.91	39.4	3.07		104.7	0.14	0.76	0.1
WFL2002-455-R11	WR	JUAN15	DAVIS, 2008	XRF; ICP-MS	42.491	-126.891	49.7945	1.35357	8.58497	8.99683	16.1076	11.9983	2.49743	0.0703581	0.120614	0.17087		8.2		8.64		352		60	5.07	3.09	1.1	16	4.29	2.2	1.08	2.85		0.48			1.89	8.41	133	0.33	1.54	0.87	39.2	3.11		106.3	0.13	0.77	0.1
ALV1406-002-B7	GL	JUAN16	Gale, 2013	ICP-MS	42.28	-127.12	49.8197	1.24512	9.25894	8.53481	15.1444	12.6719	2.63351	0.0800801	0.12012			11.766	0.42	7.019	41.9	395	0.01369	76.6	4.505	2.85901	1.03	16.19	3.60747	1.863	0.981	2.317		0.415			2.037	7.202	94.8	0.273	1.286	1.151	41.8	2.679		101.278	0.131	0.691	0.14
ALV1406-002B-007	GL	JUAN16	RYAN, 1987	DCP	41.7	-127.23																											5.18
ALV1406-003B	GL	JUAN16	RYAN, 1987	DCP	41.7	-127.23																											5.02
ALV1405-B005	GL	JUAN17	Gale, 2013	ICP-MS	41.53	-127.43	49.6729	1.49157	10.6532	8.02386	14.7803	12.0341	2.6117	0.0700456	0.160104			10.308	0.48	8.022	42.3	312	0.0106	71.1	5.538	3.53835	1.16	17.1	4.371	2.286	1.215	2.469		0.517			1.764	8.655	82.8	0.377	1.51	0.78	43.1	3.121		89.483	0.128	0.828	0.116
KAK83NP-3-16-A	GL	JUAN17	DAVIS, 1998	EMP; ICP-MS	41.522	-127.457	50.0638	1.97436	11.0342	7.35784	14.546	11.0802	2.67345	0.260079	0.210064	0.210064				18							1.5					6.8						16						4.5				1
LEE86NC-3-002	GL	JUAN17	DAVIS, 1998	EMP; ICP-MS; XRF-EDS	41.335	-127.442	49.6643	1.09369	8.88503	9.18845	16.2413	11.8004	2.5536	0.049715	0.089487	0.159088				7.4							0.93					2.5						7.8						2.4		98		0.64
LEE86NC-2-014	GL	JUAN17	DAVIS, 1998	EMP; ICP-MS	41.117	-127.495	50.3206	1.774	10.3976	7.49225	14.704	11.1478	2.90549	0.259351	0.219451	0.189526				20							1.6					7.9						15						4.3				1
LEE86NC-2-017-A	GL	JUAN17	DAVIS, 1998	EMP; ICP-MS	40.995	-127.468	50.3956	1.7219	10.0899	7.56096	14.9949	11.1425	2.83123	0.269197	0.209375	0.179465				38							1.8					13						20						4.6				1
LEE85NC-6-036	GL	JUAN17	GOLDSTEIN, 1991; DAVIS, 1998; VOLPE, 1993	MS-ID; EMP; ICP-MS; XRF-EDS	40.983	-127.503	50.0872	1.58434	9.83411	7.85894	15.3502	11.2833	2.83143	0.240185	0.180139	0.190147		41.15		17							1.4					7.1						13.5						4		139		0.9	0.609
DSDP005-0036-014-001	GL	JUAN	Jenner and O'Neil, 2012	LA-ICP-MS	40.98	-130.11	49.85	0.87	9.72	8.52	16.57	12.4	1.84	0.1	0.04			21.2236	0.235507	6.79614	50.7869	370.53	0.0279419	90.975	2.93905	1.5975	0.85709	16.6138	2.3392	1.11296	0.600169	2.61444	3.69485	0.235439	1474.99	0.475005	3.01217	5.03785	138.774	0.274276	1.03074	1.9822	36.1176	1.67054	0.41127	137.425	0.163488	0.413919	0.217924
LEE86NC-2-012	GL	JUAN17	DAVIS, 1998	EMP; ICP-MS; XRF-EDS	40.765	-127.543	50.6547	1.05283	8.52296	8.62207	15.3503	12.489	2.47061	0.139205	0.119318	0.169035				11							0.9					4.3						8.9						2.8		127		0.65
*HESS	WR	GALA3	Kelley, 2013	ICP-MS	2.22	-101.54														4.49	43.54	332	0.037	86	4.21	2.69	0.87	15.21	3.34	0.9	0.93	0.83	5.14	0.38		0.221	0.277	4.92	147.2		0.83	1.15	35.64	2.19	0.242	63.2		0.62	0.017
NAUNAZC-006-006	GL	GALA3	Kelley, 2013	ICP-MS	2.23	-101.47	50.7574	2.24181	11.9228	6.78574	13.5916	11.3598	2.5635	0.0904766	0.160847	0.191006		11.4		12.43	45.15	249	0.018	65	7.06	4.55	1.44	18.18	5.75	2.92	1.57	3.76	7.48	0.629		0.336	2.661	11.93	96.6	0.476	2.18	0.67	40.91	4.21	1.03	100.2	0.1859	1.11	0.161
NAUNAZC-006-010	GL	GALA3	Kelley, 2013	ICP-MS	2.23	-101.47														9.37	46.06	350.5	0.009	64.3	6.23	3.97	1.31	17.64	5.16	2.34	1.39	2.6	8.07	0.557		0.238	1.301	10.03	180.2	0.429	1.77		38.69	3.74	1.103	90.9	0.0935	0.987	0.077
WASTSDY-006-VG1470	GL	GALA	Jenner and O'Neil, 2012	LA-ICP-MS	2.2	-101.42	51.47	1.48	10.69	7.05	14.71	11.76	2.57	0.12	0.13			15.5531	0.497031	11.3544	44.388	227.982	0.024073	95.3405	5.44141	3.43158	1.25373	18.8809	4.46448	2.39557	1.1617	3.7946	6.10184	0.482229	1563.82	0.518077	2.95234	10.051	77.0058	0.515044	1.90293	1.79918	43.2842	3.47877	1.21392	125.9	0.179373	0.807528	0.181316
WASTSDY-006-VG1471	GL	GALA	Jenner and O'Neil, 2012	LA-ICP-MS	2.2	-101.42	51.69	1.96	10.78	7.25	15.12	10.98	3.07	0.15	0.16			17.8381	0.684131	14.8845	44.4611	208.166	0.0287215	75.2796	6.67952	4.13456	1.60311	20.206	5.60461	3.32655	1.42222	4.84247	7.17991	0.567453	1577.39	0.565213	3.58475	13.7124	90.4136	0.619624	2.53244	2.18863	39.047	4.50524	1.63153	143.803	0.220621	1.00037	0.216058
WASTSDY-006-VG1472	GL	GALA	Jenner and O'Neil, 2012	LA-ICP-MS	2.2	-101.42	50.95	1.71	10.86	7.2	14.49	11.33	2.7	0.13	0.12			14.9932	0.555715	12.8477	44.2384	227.304	0.0217431	72.8593	6.58849	4.08541	1.47809	19.2553	5.2775	3.01188	1.40508	4.31739	6.89697	0.573442	1581.69	0.543666	3.19532	11.8947	73.9418	0.549743	2.20675	1.73213	41.8501	4.08799	1.41846	126.503	0.196855	0.961624	0.188384
WASTSDY-006-VG1473	GL	GALA	Jenner and O'Neil, 2012	LA-ICP-MS	2.2	-101.42	50.82	1.59	10.47	7.57	14.8	11.68	2.73	0.07	0.13			10.6462	0.492279	10.5709	44.3011	272.153	0.0144256	79.0322	5.88811	3.57823	1.3261	18.7775	4.81506	2.60386	1.26334	3.43612	6.17186	0.506287	1507.77	0.464703	2.34154	10.3634	87.1905	0.479891	1.85023	1.17004	39.9773	3.65097	1.20672	115.283	0.141875	0.868274	0.132917
WASTSDY-006-VG1474	GL	GALA	Jenner and O'Neil, 2012	LA-ICP-MS	2.2	-101.42	50.52	2.21	12.14	6.33	14.26	10.86	3.21	0.18	0.2			20.655	0.790018	17.9056	43.011	139.307	0.035009	66.4473	7.86445	4.85522	1.79228	20.4605	6.56795	3.82966	1.69007	5.95746	7.93793	0.674757	1701.93	0.688286	4.42172	15.9799	54.3793	0.736985	2.99417	2.54133	41.5498	5.24569	1.74269	139.366	0.280242	1.17303	0.265887
WASTSDY-006-VG1475	GL	GALA	Jenner and O'Neil, 2012	LA-ICP-MS	2.2	-101.42	51.42	1.82	11.3	6.7	13.93	11.32	2.73	0.13	0.12			15.5032	0.617365	13.3006	43.4774	175.059	0.0221337	68.694	6.82752	4.27969	1.52389	19.6885	5.58948	3.19995	1.46568	4.41376	7.47936	0.603977	1617.25	0.532489	3.33004	12.6777	65.7042	0.559057	2.30736	1.80304	42.5578	4.35921	1.46742	121.381	0.204561	1.02458	0.198571
WASTSDY-006-VG1476	GL	GALA	Jenner and O'Neil, 2012	LA-ICP-MS	2.2	-101.42	51.14	1.85	11.58	6.75	14.24	10.9	2.9	0.16	0.15			18.7437	0.616834	14.096	44.0255	142.831	0.0313374	68.1657	7.02918	4.40322	1.57685	20.0145	5.97259	3.25698	1.50414	4.58602	7.70872	0.630483	1673.12	0.598047	3.54568	13.2969	60.3173	0.58729	2.38469	2.24792	43.2748	4.5604	1.49966	116.666	0.222418	1.06162	0.21901
WASTSDY-006-VG1477	GL	GALA	Jenner and O'Neil, 2012	LA-ICP-MS	2.2	-101.42	51.35	1.85	10.54	6.92	14.8	11.12	3.13	0.12	0.11			13.0223	0.639118	13.063	43.011	220.325	0.0185488	72.4745	5.94338	3.70789	1.46191	19.8054	5.14593	2.81972	1.27077	4.19137	6.73167	0.502909	1591.61	0.545934	2.84703	12.086	69.7641	0.600512	2.21184	1.37837	43.6739	4.07038	1.39797	140.432	0.180932	0.90084	0.167165
WASTSDY-006-VG1478	GL	GALA	Jenner and O'Neil, 2012	LA-ICP-MS	2.2	-101.42	51.18	1.72	10.92	6.78	14.78	11.13	3	0.21	0.15			25.6005	0.769953	16.1454	43.2107	164.824	0.0423641	74.8347	6.39953	3.94611	1.51133	19.7807	5.41526	3.04747	1.33694	5.72371	6.8417	0.541982	1607.96	0.704218	5.02245	13.451	64.0561	0.715456	2.54876	3.28676	43.7573	4.33061	1.49031	159.413	0.306444	0.940923	0.311048
WASTSDY-006-VG1479	GL	GALA	Jenner and O'Neil, 2012	LA-ICP-MS	2.2	-101.42	51.07	1.76	10.59	7.16	14.72	11.12	2.91	0.2	0.13			26.6115	0.607462	14.1998	43.0923	174.007	0.0427618	79.2878	6.12534	3.88277	1.41521	19.3738	5.18054	2.84842	1.30674	5.07237	6.4422	0.539868	1544.45	0.647988	4.58775	12.3156	78.0272	0.585812	2.31542	3.31371	42.139	4.12953	1.36853	135.05	0.274167	0.897648	0.293346
NAUNAZC-019-001	GL	GALA3	Kelley, 2013	ICP-MS	2.24	-101.37	49.8624	0.914076	8.50794	9.0805	16.1721	12.998	1.98887	0.0100448	0.0401792	0.210941		3.7		3.47	44.7	364	0.006	86.2	3.37	2.19	0.75	15.16	2.78	0.58	0.75	0.83		0.319		0.128	0.355	4.22	179.8	0.204	0.71		35.06	1.82	0.148	68.9		0.495	0.019
SON0012-206-A	GL	GALA3	PUCHELT, 1983; YI, 2000	XRF; INAA; ICP-MS; MC-ICP-MS; EMP	2.182	-100.672	50.2629	1.53203	9.76283	7.97142	15.0617	12.0824	2.55103	0.11018	0.120196	0.180294				10.6	43	277					1.21		4.6	2.6	1	3.5		0.56				10	109				35.5	3.6	0.83	104	0.13	0.9
SON0012-206-F	GL	GALA3	WHITE, 1993	ICP-MS	2.182	-100.672																																		0.318									0.118
TRI0164-022-001	GL	GALA4	Kelley, 2013	ICP-MS	2.3	-99.56	50.8738	2.14316	11.2655	7.55631	13.4938	11.4623	2.52003	0.0705436		0.17132		9.5		11.71	41.06	287.6	0.015	62.7	6.97	4.44	1.42	18.05	5.7	2.75	1.54	3.53	8.2	0.615		0.273	2.067	11.63	101.9	0.447	2.13	0.57	42.39	4.22	0.988	100.3	0.1485	1.082	0.126
TRI0164-021-004	GL	GALA5	Kelley, 2013	ICP-MS	2.31	-98.54	50.7751	1.57467	10.167	8.18382	13.8872	12.4767	2.2211	0.0703928		0.201122				8.4	43.42	344.6	0.014	77.3	5.03	3.26	1.06	17.09	4.07	1.62	1.12	2.62	5.98	0.466		0.253	1.853	7.87	108.8	0.521	1.47		44.21	2.9	0.536	105.1	0.1198	0.764	0.122
TRI0164-020-001	GL	GALA5	Kelley, 2013	ICP-MS	2.24	-97.86	50.2605	1.22651	9.4802	8.99215	14.7576	12.2945	2.34415	0.0604821		0.161286				7.91	41.38	338.7		71.5	4.7	3.01	0.97	14.82	3.74	1.44	1.04	2.09	5.92	0.437		0.21	1.559	7.23	124.7	0.378	1.34		38.11	2.66	0.437	87.3	0.1042	0.697	0.108
EWI0004-092-001	GL	GALA6	INGLE, 2010, CUSHMAN, 2004	EMP; XRF; ICP-MS; FTIR	2.192	-97.782	49.9118	1.38599	9.47948	9.28143	14.8789	12.088	2.27598	0.079409	0.111575	0.188973	0.186	11.1		8.94	47.5	355			4.86	3.12	1.06		3.98	2.29	1.14	3.02		0.488			2.4	8.77	135	0.3276	1.66	1.16	43.8	3.1		82.4	0.16	0.774	0.138
TRI0164-019-001	GL	GALA6	Kelley, 2013	ICP-MS	2.12	-97.19	49.28	1.11	9.33	8.55	15.48	12.34	2.31	0.05		0.17				6.63	43.07	398.3	0.013	79	4.45	2.93	0.94	15.58	3.58	1.27	1	1.97	6.29	0.43		0.193	1.377	6.69	146.5	0.314	1.22		41.3	2.51	0.562	91.2	0.0916	0.675	0.103
EWI0004-079-001	GL	GALA6	INGLE, 2010, CUSHMAN, 2004	EMP; XRF; ICP-MS; FTIR	2.098	-96.723	48.4671	1.00035	9.33301	9.61364	16.3895	12.1864	2.45777	0.0398913	0.0658207	0.186492	0.16	6.87		5.99	48.1	326			3.4	2.09	0.83		2.89	1.44	0.737	1.86		0.337			1.9	5.8	169		1.09	0.55	34.6	2.03		108		0.535	0.089
EWI0004-080-002	GL	GALA6	CUSHMAN, 2004; GRAHAM, 2007; INGLE, 2010	CALC; EMP; FTIR; ICPMS; MS; TIMS; TIMS-ID; XRF	2.113	-96.628	49.3366	1.13457	8.78782	9.4219	15.4448	12.8221	2.51072	0.0338275	0.0785992	0.178092	0.109	4.73		6	45.8	443			4.14	2.61	0.942		3.2	1.77	0.961	1.9		0.406			1.1	6.65	137	0.2541	1.22	0.49	43.2	2.54		84.3	0.081	0.649	0.058
EWI0004-077-002	GL	GALA7	INGLE, 2010	XRF; ICP-MS; TIMS-ID	2.281	-96.191	50.1494	1.2194	9.39209	8.84574	14.7598	12.7647	2.25477	0.0547694	0.0955976	0.181237		10.8		7.26	45.2	387			4.46	2.79	0.97		3.69	1.85	0.968	2.25		0.455			1.9	7.21	111	0.301	1.33	0.91	46.1	2.63		83.4	0.127	0.704	0.128
TRI0164-018-003	GL	GALA7	Kelley, 2013	ICP-MS	2.29	-96.18	50.6712	1.17648	9.4919	8.4782	14.4842	12.7304	2.42704	0.0300529		0.150264				5.3	41.19	368.1	0.011	87.2	4.09	2.64	0.93	15.93	3.35	1.05	0.91	1.48	5.96	0.381		0.156	1.016	5.99	103.6	0.291	1.05		40.43	2.35	0.364	91.6	0.0723	0.614	0.071
SON0012-165	WR	GALA7	YONOVER, 1989	DCP	2.3052	-96.0172												12				456																	120				40.6			92.5
EWI0004-075-001	GL	GALA7	INGLE, 2010, CUSHMAN, 2004	EMP; XRF; ICP-MS; FTIR	2.295	-95.875	50.7723	1.43757	10.6916	7.84724	14.1734	11.7938	2.56127	0.0808644	0.117802	0.20266	0.221	16.7		9.38					4.82	3.13	1.11		4	2.25	1.16	3.16		0.493				8.86		0.3945	1.65	1.63		3.06		95.4	0.178	0.786	0.162
EWI0004-073-001	GL	GALA7	CUSHMAN, 2004; GRAHAM, 2007; INGLE, 2010	CALC; EMP; FTIR; ICPMS; MS; TIMS; TIMS-ID; XRF	2.298	-95.7	48.1221	0.912909	8.89736	10.0388	16.7434	12.4138	2.25698	0.0714526	0.0605362	0.174662	0.144	14		6.58	49.8	443			3.43	2.27	0.8		2.67	1.45	0.827	2.39		0.365			2.5	6	191	0.3138	1.17	1.31	40.7	2.03		111	0.156	0.529	0.133
ALV1555-001	WR	GALA7	YONOVER, 1989	DCP	2.305	-95.65														7.81					4.63	2.84	0.96		3.72			4.13		0.45				7.29						2.58
ALV1555-005	GL	GALA7	YONOVER, 1989	DCP	2.305	-95.65	51.67	1.2	9.76	8.65	15.31	12.06	2.17	0.08	0.08	0.16		14				352																	119				39			84
ALV1555-006	WR	GALA7	YONOVER, 1989	DCP	2.305	-95.65														8.11					4.66	2.79	0.96		3.7			2.76		0.46				7.21						2.63
ALV1555-008	GL	GALA7	YONOVER, 1989	DCP	2.305	-95.65	50.7733	1.08913	9.2279	8.81205	15.1587	12.1785	2.07925	0.0693083	0.0990118	0.207925		13.4				401																	131				41			84
ALV1555-010	WR	GALA7	YONOVER, 1989	DCP	2.305	-95.65														7.54					4.58	2.78	0.93		3.67			3.18		0.45				6.88						2.52
DST0041-005-556	GL	GALA	Jenner and O'Neil, 2012	LA-ICP-MS	2.44	-95.62	50.07	0.91	9.08	8.27	16.35	12.8	2.13	0.05	0.09			7.49276	0.259435	5.74249	47.4443	393.79	0.00841979	110.595	3.31461	2.18043	0.743712	16.6968	2.77132	1.27651	0.735383	1.68287	4.08241	0.32554	1441.65	0.363291	1.19846	5.61574	138.816	0.313514	0.923183	0.731109	45.506	2.0604	0.746955	96.6877	0.0640966	0.494303	0.0878829
DST0041-005-557	GL	GALA	JENNER, 2012; KURZ, 1982;	CALC; EMP; LA-ICPMS; MS	2.44	-95.62	50.62	1.04	8.79	8.53	16.49	12.34	2.24	0.04	0.06			12.1799	0.313698	7.12086	45.8985	379.755	0.0135414	93.4195	3.77024	2.37601	0.863763	17.197	3.08697	1.52559	0.814579	2.39719	4.52667	0.348527	1362.82	0.37643	2.14765	6.56068	155.269	0.347293	1.16996	1.29805	39.8887	2.273	0.858734	99.0781	0.122254	0.546221	0.149019
DST0041-005-558	GL	GALA	Jenner and O'Neil, 2012	LA-ICP-MS	2.44	-95.62	50.42	0.97	8.69	8.41	16.44	12.11	2.21	0.08	0.08			7.36327	0.245255	5.86763	48.0224	402.781	0.00798618	110.216	3.69556	2.46725	0.819934	16.9739	2.8512	1.37116	0.816569	1.82016	4.01144	0.359824	1439.95	0.347062	1.25045	5.81773	147.697	0.301748	1.01673	0.717719	43.5718	2.08903	0.746547	91.6709	0.0755884	0.521153	0.0856427
DST0041-005-559	GL	GALA	Jenner and O'Neil, 2012	LA-ICP-MS	2.44	-95.62	50.08	1.04	8.76	8.27	16.87	12.41	2.22	0.07	0.07			11.519	0.299736	6.83258	46.3031	402.874	0.0138153	102.935	3.41588	2.15009	0.798231	17.0629	2.76081	1.3684	0.740192	2.23924	4.36437	0.310682	1321.03	0.362469	1.98532	6.15412	170.582	0.365742	1.12223	1.2291	37.5658	2.11636	0.840079	99.84	0.108428	0.513478	0.137507
DST0041-005-VG1311	GL	GALA	Jenner and O'Neil, 2012	LA-ICP-MS	2.44	-95.62	49.57	1.09	9.21	8.49	15.44	12.46	2.28	0.07	0.12			7.26433	0.274964	5.81877	47.4902	402.946	0.00798381	108.216	3.57037	2.33136	0.809897	16.7381	2.80169	1.2816	0.794396	1.76396	4.00339	0.344921	1413.82	0.353107	1.21432	5.67159	146.608	0.280845	1.00456	0.707626	42.341	2.04672	0.811315	90.4503	0.0707692	0.512687	0.0798377
AII0112-24-010-001	WR	GALA8	YONOVER, 1989	DCP	2.37	-95.62												10.2		6.18		384			3.51	2.14	0.79		3.04					0.27				5.65	152				41	1.76		105
EWI0004-071-001	GL	GALA	CUSHMAN, 2004; GRAHAM, 2007; INGLE, 2010	CALC; EMP; FTIR; ICPMS; MS; TIMS; TIMS-ID; XRF	2.422	-95.602	49.515	1.017		9.538	16.322	12.471	2.175	0.041	0.07	0.164	0.153	8.36		6.14	51.5	520			3.68	2.34	0.819		2.95	1.44	0.807	1.87		0.388			1.8	5.95	211	0.2654	1.11	0.74	45.8	2.11		94	0.1	0.561	0.095
KAK1979-017-003	GL	GALA	COTTRELL, 2011; COTTRELL, 2013; MELSON, 2003	EMP; FTIR; ICPMS	2.4303	-95.5505	49.77	0.85	9.28	9.92	15.86	12.07	2.16	0.05	0.09		0.12	5.81	0.246	5.07	52.1	508	0.004	92.2	3.44	2.19	0.756		2.8	1.22	0.749	1.45	4.75	0.325			1.1	4.86	300.3	0.282	0.882	0.544	36.1	1.87		85.3	0.076	0.513	0.082
KAK1979-017-004	GL	GALA	COTTRELL, 2011; COTTRELL, 2013; MELSON, 2003	EMP; FTIR; ICPMS	2.4303	-95.5505	49.46	0.84	9.19	9.9	16.06	11.99	2.12	0.04	0.07		0.14	5.68	0.28	4.84	47.4	478	0.01	81.8	3.57	2.27	0.749		2.96	1.36	0.795	1.54	4.49	0.347			1.07	4.93	269.4	0.287	0.894	0.492	37.2	1.91		84.2	0.076	0.526	0.081
KAK1979-017-014	GL	GALA	COTTRELL, 2011; COTTRELL, 2013; MELSON, 2003	EMP; FTIR; ICPMS	2.4303	-95.5505	49.59	0.86	9.19	9.72	16.12	11.96	2.18	0.04	0.07		0.12	5.78	0.236	5.01	53.7	501	0.003	97.4	3.24	2.16	0.719		2.69	1.17	0.732	1.44	4.34	0.314			1.11	4.67	305.9	0.253	0.869	0.516	35.5	1.83		79.2	0.066	0.494	0.076
KAK1979-017-032	GL	GALA	COTTRELL, 2011; COTTRELL, 2013; MELSON, 2003	EMP; FTIR; ICPMS	2.4303	-95.5505	49.53	0.85	9.24	9.76	16.19	11.76	2.15	0.05	0.09		0.13	5.96	0.247	5.17	56.9	531	0.009	104	3.04	2.04	0.711		2.56	1.12	0.702	1.42	4.78	0.299			1.16	4.64	320.7	0.258	0.862	0.597	34.5	1.72		77.8	0.064	0.469	0.075
KAK1979-017-033	GL	GALA	Jenner and O'Neil, 2012	LA-ICP-MS	2.43	-95.55	49.27	0.88	9.24	9.37	16.12	12.16	2.26	0.06	0.1			6.08306	0.218087	4.60608	50.0346	458.471	0.00539806	102.078	3.35964	2.1369	0.735943	16.5093	2.57663	1.16862	0.716207	1.45834	3.778	0.320218	1333.68	0.30378	1.11044	4.87695	204.082	0.230012	0.802013	0.535935	39.0712	1.80727	0.732357	80.416	0.0693559	0.484747	0.0820592
KAK1979-017-034	GL	GALA	Jenner and O'Neil, 2012	LA-ICP-MS	2.43	-95.55	49.83	0.87	9.37	9.18	16.3	12.11	2.27	0.05	0.07			6.16119	0.238672	4.64393	50.2814	460.226	0.00610777	103.009	3.36252	2.20022	0.7438	16.8123	2.56896	1.20965	0.740195	1.4864	3.86291	0.330202	1341.77	0.29313	1.15168	4.85614	202.779	0.214242	0.85846	0.53535	39.3335	1.84219	0.745543	81.9426	0.0664446	0.481489	0.0810758
KAK1979-017-036	GL	GALA	Jenner and O'Neil, 2012	LA-ICP-MS	2.43	-95.55	49.86	0.93	9.24	8.44	16.23	12.41	2.26	0.07	0.09			6.16575	0.225922	4.71834	47.8365	424.309	0.0079366	103.927	3.49506	2.30056	0.771606	16.8162	2.65651	1.23252	0.772877	1.53681	3.88467	0.346415	1341.28	0.290339	1.16611	4.94369	151.547	0.236486	0.845907	0.547625	40.3588	1.86777	0.767601	83.1367	0.0699079	0.49859	0.0779604
KAK1979-017-037	GL	GALA	Jenner and O'Neil, 2012	LA-ICP-MS	2.43	-95.55	49.62	0.85	9.33	9.51	16.04	12.1	2.17	0.06	0.07			5.93083	0.228022	4.57962	51.6712	468.927	0.00652576	101.286	3.39633	2.20779	0.742366	16.4256	2.62497	1.18689	0.735852	1.4863	3.82714	0.298684	1351.6	0.287466	1.13559	4.86491	222.215	0.226232	0.825392	0.536861	39.5117	1.84213	0.733846	81.4841	0.0691359	0.484711	0.0753965
KAK1979-017-038	GL	GALA	Jenner and O'Neil, 2012	LA-ICP-MS	2.43	-95.55	49.47	0.85	9.34	9.56	16.17	12.01	2.16	0.03	0.09			5.98018	0.194898	4.55068	51.7812	465.123	0.00716118	101.261	3.34219	2.19137	0.734777	16.543	2.61732	1.17029	0.73487	1.47437	3.76928	0.310898	1345.82	0.291277	1.11586	4.72039	225.636	0.212761	0.826155	0.528843	39.1901	1.81404	0.748959	80.8261	0.0633964	0.481589	0.0777371
KAK1979-017-040	GL	GALA	Jenner and O'Neil, 2012	LA-ICP-MS	2.43	-95.55	49.62	0.87	9.33	9.44	16.28	12.21	2.2	0.04	0.07			6.00173	0.209437	4.63925	51.2351	467.447	0.00508531	102.715	3.33247	2.21296	0.744527	16.5886	2.60608	1.23849	0.742434	1.50264	3.88659	0.31357	1357.26	0.289609	1.13103	4.80324	210.662	0.226908	0.825768	0.538674	39.0153	1.86272	0.765356	81.4746	0.0684432	0.476152	0.0783319
KAK1979-017-041	GL	GALA	Jenner and O'Neil, 2012	LA-ICP-MS	2.43	-95.55	49.58	0.87	9.17	9.52	16.24	12	2.16	0.05	0.08			5.506	0.208795	4.49628	50.2874	458.23	0.00529992	100.213	3.2901	2.1467	0.7472	16.5168	2.53848	1.22775	0.729668	1.44127	3.79575	0.333725	1335.11	0.281876	1.03587	4.67387	213.081	0.222359	0.811367	0.496598	39.3277	1.77359	0.701189	80.9249	0.0569528	0.461903	0.0725101
KAK1979-017-042	GL	GALA	Jenner and O'Neil, 2012	LA-ICP-MS	2.43	-95.55	49.73	0.9	9.22	8.99	16.48	12.22	2.21	0.05	0.07			5.95195	0.205815	4.60171	50.9056	464.14	0.00694581	103.046	3.4881	2.25307	0.748268	16.777	2.56084	1.21397	0.751549	1.51726	3.82209	0.32095	1356.49	0.289185	1.13227	4.81268	203.611	0.220069	0.838946	0.543438	38.8073	1.87471	0.708813	81.7673	0.0667475	0.487575	0.0747622
KAK1979-017-043	GL	GALA	Jenner and O'Neil, 2012	LA-ICP-MS	2.43	-95.55	49.8	0.9	9.24	9.2	16.02	12.21	2.14	0.07	0.08			5.93723	0.209185	4.5946	52.0368	467.907	0.00556165	102.544	3.39152	2.19036	0.743314	16.7112	2.54841	1.16529	0.744105	1.46624	3.8751	0.317456	1358.83	0.289024	1.11392	4.81764	223.597	0.209176	0.821062	0.534928	38.2548	1.82954	0.745318	81.3738	0.0651802	0.485622	0.075507
ALV1550-002	WR	GALA8	YONOVER, 1989; EASON, 2006	DCP; XRF	2.367	-95.55	49.8572	0.843852	8.62463	9.57353	15.443	13.0922	2.04922	0.0502814	0.0402251	0.150844		13.6			42	621		79													2		163			1	40			83
ALV1550-004	WR	GALA8	YONOVER, 1989	DCP	2.367	-95.55												15		8.37		406			4.19	2.46	0.91		3.4					0.31				7.1	141				38	2.2		94
ALV1551-005	WR	GALA8	YONOVER, 1989	DCP	2.367	-95.55												18.8		8.95		344			4.34	2.53	0.99		3.65					0.31				7.61	163				38	2.56		117
ALV1552-002	WR	GALA8	YONOVER, 1989	DCP	2.377	-95.537												11.2				493																	216				38.8			107
ALV1552-004	WR	GALA8	YONOVER, 1989	DCP	2.377	-95.537												9.9		7.11		506			3.74	2.39	0.86		3.25					0.38				6.45	228				38	2.15		104
ALV1552-005	WR	GALA8	YONOVER, 1989	DCP	2.377	-95.537												12.3				460																	184				39.5			104
ALV1552-008	WR	GALA8	YONOVER, 1989; EASON, 2006	DCP; XRF	2.377	-95.537	48.8778	1.00929	10.0059	9.9773	15.3579	12.2044	2.07992	0.03031	0.0505167	0.161653				6.49	48	398		79	4.23	2.77	0.85		3.47					0.45			1.8	5.75	197				42	2.09		75
AII0112-24-005-002	WR	GALA8	YONOVER, 1989	DCP	2.4	-95.53												11.9		5.85		497			3.72	2.31	0.8		3.06					0.31				5.6	197				40	1.81		88
AII0112-24-005-009	WR	GALA8	YONOVER, 1989	DCP	2.4	-95.53												9.3				502																	155				39.6			91.3
AII0112-24-003-001	WR	GALA8	YONOVER, 1989	DCP	2.37	-95.53														7.92					4.21	2.55	0.9		3.54					0.35				6.87						2.18
AII0112-24-003-002	WR	GALA8	YONOVER, 1989	DCP	2.37	-95.53														6.51					3.71	2.21	0.82		3.16					0.31				5.68						1.92
AII0112-24-003-006	WR	GALA8	YONOVER, 1989	DCP	2.37	-95.53												10.7				451																	147				38			96
KAK1979-011-001	GL	GALA	Jenner and O'Neil, 2012	LA-ICP-MS	2.64	-95.5	49.96	0.95	8.86	8.82	15.92	12.78	1.92	0.06	0.09			11.7278	0.249673	5.6748	46.5814	476.002	0.0127866	97.7047	3.35219	2.15817	0.725982	16.4618	2.74186	1.18421	0.729303	1.96117	4.21982	0.321913	1340.39	0.335793	1.83843	5.43859	167.8	0.277218	0.945788	1.20124	41.3741	1.97672	0.790225	76.2295	0.111857	0.467056	0.132664
KAK1979-011-085	GL	GALA	Jenner and O'Neil, 2012	LA-ICP-MS	2.64	-95.5	50.26	0.92	8.73	9.31	15.6	12.89	1.8	0.07	0.07			12.1724	0.236891	5.70963	47.5859	475.048	0.0180441	90.9548	3.38348	2.22261	0.756763	13.9724	2.65714	1.26402	0.77765	1.84601	4.48467	0.330721	1243.92	0.394432	1.89994	5.01065	188.748	0.277452	0.93742	1.14895	39.4506	1.91656	0.564068	78.6776	0.107848	0.480741	0.133503
KAK1979-011-086	GL	GALA	Jenner and O'Neil, 2012	LA-ICP-MS	2.64	-95.5	50.51	0.88	8.89	9.46	15.66	12.71	1.88	0.08	0.09			11.5077	0.247542	5.70047	48.3063	481.891	0.0125909	90.3945	3.52102	2.23256	0.772628	15.0587	2.6783	1.2975	0.768688	1.89164	4.64579	0.327217	1255.68	0.34732	1.92612	5.29716	195.323	0.233128	0.938121	1.18634	39.4211	1.99212	0.604243	80.6443	0.110887	0.500325	0.124532
KAK1979-011-087	GL	GALA	Jenner and O'Neil, 2012	LA-ICP-MS	2.64	-95.5	49.83	0.86	8.92	9.42	15.76	12.78	1.93	0.06	0.08			12.0441	0.243154	5.63789	47.6369	476.273	0.0114441	92.4679	3.37098	2.23528	0.779036	14.3876	2.58709	1.25274	0.755689	1.85184	4.4955	0.313924	1271.54	0.365107	1.89594	5.2977	191.693	0.258345	0.931163	1.08989	38.9173	1.91655	0.570272	79.1113	0.108961	0.476132	0.12078
KAK1979-011-088	GL	GALA	Jenner and O'Neil, 2012	LA-ICP-MS	2.64	-95.5	50.43	0.88	8.96	9.28	15.51	12.69	1.86	0.05	0.08			12.3297	0.230065	5.77847	47.0936	480.579	0.0117167	91.9905	3.35072	2.1766	0.761292	14.3797	2.59861	1.30638	0.760201	1.89177	4.4968	0.340987	1272.36	0.369471	1.96665	5.13589	185.735	0.238967	0.96644	1.2599	39.5674	1.93944	0.601522	79.6541	0.109591	0.488305	0.124549
KAK1979-011-090	GL	GALA	Jenner and O'Neil, 2012	LA-ICP-MS	2.64	-95.5	50.66	1.74	12.4	6.92	13.83	10.79	2.39	0.14	0.14			36.1928	0.509764	14.2108	48.454	173.821	0.038231	71.5896	7.0657	4.42604	1.44471	17.7331	5.36524	2.96166	1.56953	5.14204	7.29261	0.65055	1620.64	0.721117	6.44886	11.7111	97.2285	0.537222	2.23073	3.9515	43.0588	4.18248	1.18135	83.8954	0.372672	1.03766	0.374946
KAK1979-011-091	GL	GALA	Jenner and O'Neil, 2012	LA-ICP-MS	2.64	-95.5	50.52	0.9	8.82	9.42	15.67	12.96	1.81	0.06	0.1			11.7947	0.243112	5.57316	47.2268	472.511		86.9726	3.63799	2.21945	0.741916	14.951	2.5102	1.35078	0.774359	1.90986	4.55179	0.325862	1256.8	0.351537	1.89498	5.06036	183.115	0.273787	0.931901	1.14465	39.6428	1.76554	0.578819	78.925	0.111521	0.476434	0.143634
KAK1979-011-096	GL	GALA	Jenner and O'Neil, 2012	LA-ICP-MS	2.64	-95.5	50.09	0.92	8.81	9	15.63	12.82	1.89	0.07	0.11			11.8017	0.23446	5.68918	47.3444	474.929	0.0118785	92.4437	3.35182	2.20235	0.786386	14.4686	2.5862	1.31283	0.759224	1.89082	4.38659	0.33746	1289.13	0.345651	1.88439	5.26726	172.168	0.250576	0.945206	1.06478	39.3002	1.9071	0.598114	79.7657	0.10996	0.516632	0.108376
KAK1979-011-097	GL	GALA	Jenner and O'Neil, 2012	LA-ICP-MS	2.64	-95.5	49.93	0.92	8.78	9.66	15.56	12.79	1.83	0.07	0.1			12.1882	0.240812	5.51995	47.4472	471.015	0.0115086	88.8963	3.4416	2.23916	0.735371	13.9854	2.52117	1.2416	0.719528	1.83206	4.32313	0.335926	1273.87	0.352886	1.89381	4.96388	186.254	0.21617	0.945987	1.09226	38.7429	1.82999	0.556651	77.5277	0.114869	0.48796	0.117193
KAK1979-010-015	GL	GALA	Jenner and O'Neil, 2012	LA-ICP-MS	2.65	-95.49	48.94	0.85	9.14	9.04	17.83	12.53	2.12	0.04	0.06			5.71194	0.231926	4.93746	49.7341	338.335	0.00557535	101.117	3.58514	2.40102	0.76624	16.6534	2.67941	1.28341	0.79429	1.57923	3.7698	0.362833	1323.72	0.290211	1.0512	5.02911	184.377	0.225543	0.886304	0.552652	38.4353	1.86347	0.762219	88.6551	0.0655983	0.502392	0.0750483
KAK1979-010-016	GL	GALA	Jenner and O'Neil, 2012	LA-ICP-MS	2.65	-95.49	49.48	0.87	9.28	8.96	17.07	12.65	2.11	0.05	0.08			7.23251	0.273709	5.44874	49.6158	363.443	0.0056649	101.08	3.82476	2.55877	0.801828	16.8152	2.80953	1.37357	0.857379	1.79494	3.94423	0.37779	1364.19	0.302674	1.29224	5.45959	180.651	0.412963	0.968631	0.68708	41.1009	2.02571	0.820075	88.8107	0.082782	0.536191	0.0943552
KAK1979-010-017	GL	GALA	Jenner and O'Neil, 2012	LA-ICP-MS	2.65	-95.49	49.12	0.83	9.09	9.37	17.86	12.51	2.09	0.05	0.09			5.31621	0.216962	4.81476	51.2122	327.996	0.00348783	101.945	3.49593	2.39314	0.775113	16.6672	2.56174	1.21395	0.78874	1.52507	3.72705	0.359208	1342.88	0.271686	0.997869	4.90138	208.743	0.235259	0.887856	0.522623	39.4337	1.86527	0.759793	89.0924	0.0630384	0.50361	0.0734025
KAK1979-010-019	GL	GALA	Jenner and O'Neil, 2012	LA-ICP-MS	2.65	-95.49	48.97	0.87	9.02	8.9	17.53	12.74	2.12	0.04	0.07			5.39781	0.2353	4.73565	50.9865	328.54	0.00475345	99.1803	3.70189	2.48443	0.778412	16.3564	2.58991	1.24755	0.828587	1.56682	3.72392	0.36957	1335.89	0.272155	1.02252	4.8124	207.03	0.218193	0.895635	0.518966	37.0227	1.79549	0.687584	89.5685	0.0653586	0.514867	0.0756099
KAK1979-010-020	GL	GALA	Jenner and O'Neil, 2012	LA-ICP-MS	2.65	-95.49	48.96	0.85	9.1	9.33	17.73	12.51	2.1	0.05	0.09			5.41179	0.198118	4.78006	50.4826	326.238	0.00529855	101.218	3.60507	2.37818	0.762218	16.4669	2.60757	1.26017	0.814132	1.53676	3.65847	0.357508	1323.64	0.269632	1.00016	4.88037	204.938	0.216669	0.857303	0.500974	38.935	1.7923	0.756509	88.6262	0.0622129	0.505541	0.0741737
KAK1979-010-022	GL	GALA	Jenner and O'Neil, 2012	LA-ICP-MS	2.65	-95.49	49.08	0.81	9.07	9.29	17.74	12.54	2.11	0.04	0.09			5.48475	0.218138	4.8912	50.816	349.764	0.00423425	100.006	3.50421	2.37062	0.767303	16.5982	2.57322	1.21368	0.790348	1.51935	3.78311	0.354019	1335.45	0.263781	1.03197	4.833	205.785	0.214353	0.857647	0.508724	39.0958	1.84714	0.792322	89.0645	0.0616278	0.503986	0.0751061
KAK1979-010-023	GL	GALA	Jenner and O'Neil, 2012	LA-ICP-MS	2.65	-95.49	48.87	0.81	9.04	9.4	17.58	12.57	2.04	0.03	0.09			5.39796	0.216121	4.79652	51.1671	327.841	0.00398685	100.628	3.54026	2.37937	0.737824	16.4965	2.59555	1.27099	0.780217	1.50867	3.75021	0.356071	1327.24	0.286588	0.993045	4.78351	217.196	0.21354	0.858049	0.508108	39.4668	1.75515	0.758467	87.6207	0.0646732	0.487084	0.0678918
KAK1979-010-024	GL	GALA	Jenner and O'Neil, 2012	LA-ICP-MS	2.65	-95.49	48.74	0.84	8.97	9.5	17.31	12.53	2.06	0.03	0.08			5.8856	0.231663	4.90132	50.3258	343.399	0.00470145	99.9135	3.59592	2.33934	0.75815	16.3901	2.62082	1.17445	0.77209	1.57287	3.6865	0.35809	1308.92	0.279085	1.09158	4.95813	212.223	0.206786	0.88992	0.564426	39.3226	1.83969	0.735804	87.9381	0.0720372	0.51593	0.0773247
KAK1979-010-025	GL	GALA	Jenner and O'Neil, 2012	LA-ICP-MS	2.65	-95.49	48.81	0.81	9.02	9.17	17.52	12.69	2.14	0.04	0.1			5.39888	0.193964	4.87095	49.7363	327.368	0.00643905	101.641	3.58228	2.36084	0.766733	16.4989	2.59534	1.29531	0.782597	1.52948	3.7369	0.354951	1333.01	0.300287	1.01649	4.92465	193.728	0.211856	0.854476	0.520601	39.8586	1.86043	0.76814	88.0256	0.0622298	0.500793	0.0673709
KAK1979-010-026	GL	GALA	Jenner and O'Neil, 2012	LA-ICP-MS	2.65	-95.49	49.61	0.89	9.01	8.98	17.05	12.76	2.08	0.04	0.1			7.03761	0.249442	5.3288	49.2265	358.698	0.00705536	102.067	3.56107	2.38016	0.800936	16.4261	2.7137	1.307	0.789919	1.71575	3.91199	0.36173	1344.77	0.312356	1.27108	5.24981	182.548	0.257134	0.945315	0.702243	39.8677	1.94982	0.774737	89.4467	0.0790039	0.521456	0.0874089
KAK1979-010-034	GL	GALA	CHRISTIE, 1986; COTTRELL, 2011; COTTRELL, 2013; KELLEY, 2009; MELSON, 2003	DCP; EMP; FTIR; ICPMS; SIMS; SP-PH	2.65	-95.49	48.06	0.99	9.49	8.99	17.33	12.02	2.35	0.05	0.07		0.22	5.97	0.335	5.81	37.9	307	0.019	76.4	4.61	3.05	0.923		3.73	1.57	1.05	1.94	3.45	0.482			1.29	6.34	142.2	0.236	1.13	0.445	38.4	2.36		100	0.082	0.662	0.088
AII0112-24-004-005	WR	GALA8	YONOVER, 1989	DCP	2.35	-95.49												12.9		8.26		360			4.14	2.47	0.92		3.45					0.34				7.06	124				39	2.2		106
DST0041-008-010	GL	GALA	Jenner and O'Neil, 2012	LA-ICP-MS	2.6	-95.33	50.76	1.65	11.58	6.95	14.51	11.46	2.4	0.15	0.15			29.6858	0.466013	12.3657	48.419	229.243	0.0341624	69.3782	6.06912	3.95348	1.25338	19.2038	4.90639	2.61175	1.33342	4.55579	6.61228	0.559562	1651.5	0.572632	5.44923	10.5712	114.234	0.462883	1.95923	3.14523	44.04	3.61082	1.24857	82.0599	0.297463	0.873409	0.435001
DST0041-008-011	GL	GALA	Jenner and O'Neil, 2012	LA-ICP-MS	2.6	-95.33	50.83	1.59	11.81	7.57	14.2	11.29	2.25	0.14	0.14			29.8767	0.439583	12.4644	47.5773	229.776	0.0356722	76.428	6.16567	3.97739	1.25806	19.215	4.90858	2.64519	1.31101	4.58745	6.37329	0.57586	1665.2	0.548088	5.4788	10.6929	108.067	0.474896	1.9405	3.12264	44.2171	3.6903	1.19936	82.8232	0.316529	0.882382	0.429786
DST0041-008	GL	GALA9	Kelley, 2013	ICP-MS	2.6	-95.33	49.83	1.55	11.42	7.74	14.09	10.96	2.38	0.13		0.2		31.1		13.06	46.34	234	0.039	70	6.54	4.28	1.28	17.95	5.19	2.46	1.47	4.8	8.62	0.615		0.393	5.552	10.99	112.7	0.495	2.13	2.9	43.29	3.8	0.864	86	0.352	1.004	0.428
EWI0004-070-001	GL	GALA9	CUSHMAN, 2004; GRAHAM, 2007; INGLE, 2010; SALTERS, 2011	CALC; EMP; FTIR; ICPMS; MC-ICP-MS; MS; TIMS; TIMS-ID; XRF	2.63	-95.315	50.2321	1.56771	10.7935	8.42599	14.2997	11.6462	2.22146	0.102965	0.155947	0.199932	0.259	28.6		12.2	48.4	329			5.98	3.63	1.18		4.6	2.7	1.34	4.54		0.602			5	10.7	135	0.4319	2	3.28	45.5	3.53		78.2	0.33	0.893	0.341
KAK1979-016-002	GL	GALA	Jenner and O'Neil, 2012	LA-ICP-MS	2.33	-95.3	49.61	1.18	9.65	8.06	15.6	12.7	2.4	0.08	0.14			12.5176	0.344949	7.83574	46.641	360.121	0.0120959	103.311	4.0993	2.5344	1.01527	15.9309	3.37328	1.70393	0.856181	2.55111	4.72372	0.378157	1470.36	0.423913	2.09177	7.02753	96.8801	0.376117	1.31325	1.11112	41.6308	2.44665	0.786843	114.462	0.121053	0.593962	0.137501
KAK1979-016-003	GL	GALA	Jenner and O'Neil, 2012	LA-ICP-MS	2.33	-95.3	50.11	1.2	9.67	8.08	15.53	12.7	2.49	0.09	0.12			12.928	0.36257	7.82363	46.606	358.282	0.0113856	103.161	4.10175	2.46415	1.0282	15.9927	3.21786	1.69877	0.904496	2.55889	4.81285	0.359734	1452.43	0.40764	2.10604	6.97178	97.4447	0.393889	1.2933	1.17905	41.9086	2.5539	0.828143	115.767	0.122728	0.570311	0.132535
KAK1979-016-004	GL	GALA	Jenner and O'Neil, 2012	LA-ICP-MS	2.33	-95.3	50.22	1.16	9.61	8.01	15.65	12.6	2.43	0.09	0.14			12.8433	0.371582	7.84441	46.5488	359.541	0.0112993	103.161	4.20508	2.71629	1.00479	15.8757	3.36613	1.71906	0.900625	2.57467	4.75837	0.376722	1454.24	0.424426	2.17334	7.23199	98.8938	0.625841	1.33134	1.1272	43.3982	2.4774	0.79592	115.49	0.123254	0.586507	0.126287
KAK1979-016-005	GL	GALA	Jenner and O'Neil, 2012	LA-ICP-MS	2.33	-95.3	49.7	1.18	9.69	8.02	15.37	12.8	2.39	0.09	0.14			13.0248	0.370118	7.5758	46.5616	368.246	0.0179199	105.504	4.01385	2.5816	0.999422	15.9392	3.16074	1.64921	0.866334	2.51434	4.75192	0.358901	1460.77	0.406741	2.15658	6.91429	93.2433	0.378195	1.24161	1.24079	43.1762	2.51404	0.781633	110.586	0.125433	0.595839	0.127049
KAK1979-015-001	GL	GALA	Jenner and O'Neil, 2012	LA-ICP-MS	2.6	-95.28	50.96	1.83	12.05	6.52	13.77	11.24	2.35	0.14	0.17			32.6762	0.510538	14.1797	46.0116	248.569	0.0428718	73.019	6.87276	4.35792	1.39554	19.8442	5.6175	2.93766	1.50269	5.304	7.19397	0.64168	1731.87	0.645843	5.94368	12.3071	72.783	0.577631	2.28819	3.81562	47.9631	4.2235	1.39417	81.2657	0.344121	1.00001	0.435303
KAK1979-015-002	GL	GALA	Jenner and O'Neil, 2012	LA-ICP-MS	2.6	-95.28	50.8	1.86	12.01	6.61	13.86	11.3	2.33	0.15	0.2			32.8723	0.541214	14.1768	45.5219	253.612	0.0443384	73.4408	6.82727	4.41805	1.36836	19.8597	5.45386	2.85995	1.49139	5.18466	7.24543	0.639836	1713.26	0.625667	5.90205	12.1371	75.104	0.560108	2.28779	3.82859	45.5533	4.20074	1.46057	80.6832	0.334344	1.00503	0.425199
KAK1979-015-003	GL	GALA	Jenner and O'Neil, 2012	LA-ICP-MS	2.6	-95.28	50.61	1.75	11.76	6.85	14.34	11.42	2.29	0.14	0.16			31.1343	0.468396	13.3967	46.2311	276.883	0.0403714	73.8672	6.53447	4.28413	1.33505	19.5769	5.20451	2.7737	1.41987	4.93508	6.95009	0.606633	1670.44	0.60358	5.59935	11.5451	87.0682	0.52014	2.1359	3.59975	43.9515	3.94701	1.37959	81.1509	0.320885	0.951126	0.417858
KAK1979-015-004	GL	GALA	Jenner and O'Neil, 2012	LA-ICP-MS	2.6	-95.28	50.67	1.79	11.9	6.81	14.12	11.33	2.3	0.14	0.19			31.5368	0.439194	13.5786	46.0221	281.873	0.0416054	73.6538	6.44345	4.13278	1.30725	19.7305	5.27068	2.78739	1.3922	4.92303	6.96712	0.601565	1690.29	0.605787	5.6802	11.5748	82.4996	0.542708	2.15639	3.66928	44.7549	3.93854	1.37199	80.2924	0.319001	0.940365	0.41243
KAK1979-015-005	GL	GALA	Jenner and O'Neil, 2012	LA-ICP-MS	2.6	-95.28	50.61	1.72	11.84	6.94	14.25	11.24	2.27	0.14	0.17			31.2846	0.509199	13.3224	46.5882	279.854	0.0412808	74.1176	6.48651	4.22229	1.30775	19.8677	5.31524	2.75774	1.39611	4.92058	7.07424	0.594137	1693.35	0.600731	5.64454	11.5605	87.7154	0.506584	2.12637	3.6502	45.3094	3.95712	1.40803	80.2612	0.314015	0.946515	0.411199
KAK1979-015-006	GL	GALA	Jenner and O'Neil, 2012	LA-ICP-MS	2.6	-95.28	50.48	1.77	11.77	6.91	14.24	11.38	2.32	0.13	0.17			31.2355	0.504159	13.3395	46.0058	280.09	0.0410093	73.6941	6.34984	4.09346	1.30113	19.8318	5.42313	2.70888	1.37771	4.86094	6.82186	0.611539	1675.02	0.626981	5.62282	11.576	87.0513	0.521915	2.12498	3.58958	46.5596	3.96268	1.35846	80.058	0.321924	0.919933	0.412202
KAK1979-014-010	GL	GALA	Jenner and O'Neil, 2012	LA-ICP-MS	2.74	-95.24	51.08	1.82	12.8	6.13	13.6	10.93	2.48	0.15	0.17			35.0072	0.513804	14.0241	47.7495	78.8493	0.0435623	83.4028	6.58186	4.18484	1.39239	20.0783	5.38023	2.68396	1.42176	5.39732	7.02798	0.622018	1824.14	0.645751	6.26285	11.6751	47.3563	0.527711	2.21036	3.81389	46.4106	4.07773	1.37452	84.1515	0.359624	0.966075	0.477865
DST0041-006-032		GALA9	Arevalo, 2009	LA-ICP-MS	2.7	-95.24	69.36	0.538622	5.96	0.48	12	2.84	4.29	1.39333	0.09			167.484		84.6901					24.2665	17.0978	3.19655		20.0613	17.7801	5.44089	31.381		2.66077				56.2719		3.87955	11.9237		9.82778	16.1304		57.0282			4.39866
DST0041-006-041		GALA9	Arevalo, 2009	LA-ICP-MS	2.7	-95.24	69.42	0.607744	4.96	0.57	12.65	3.02	4.35	1.47499	0.04			175.899		70.4955					18.6745	13.5159	2.44656		15.1764	11.474	4.23089	27.2172		2.11639				44.3551		3.60941	9.61728		8.55398	12.3818		56.8349		2.84053	4.54537
DST0041-006-M	WR	GALA9	Kelley, 2013	ICP-MS	2.7	-95.24														31.19	32.51	64.3		34.3	11.32	7.81	1.72	20.15	8.57	6.03	2.61	12.09		1.147		0.698		21.53	35.6	1.459	4.51		34.35	6.74		86.4		1.748	1.895
DST0041-006-V	WR	GALA9	Kelley, 2013	ICP-MS	2.7	-95.24														69.9		23.2		20.3	20.87	14.59	2.62	23.7	15.65	13.8	4.83	27.27	28.43	2.125				44.62	13.8	3.284	9.77		14.63	13.04		68.5		3.261	4.636
EWI0004-069-001	GL	GALA9	COLIN, 2011; CUSHMAN, 2004; GRAHAM, 2007; INGLE, 2010	CALC; EMP; FTIR; ICPMS; MS; TIMS; TIMS-ID; XRF	2.635	-95.21	50.1357	1.64091	11.4402	8.41299	13.9266	11.2985	2.25396	0.122038	0.166052	0.220069	0.288	33.7		13.1	48.4	240			6.18	3.92	1.25		5.13	2.79	1.35	4.81		0.643			6.4	11	125	0.4503	2.17	3.11	44.8	3.76		76.7	0.38	0.964	0.449
EWI0004-067-001	GL	GALA9	CUSHMAN, 2004; GRAHAM, 2007; INGLE, 2010	CALC; EMP; FTIR; ICPMS; MS; TIMS; TIMS-ID; XRF	2.627	-95.032	49.8003	1.40537	10.1668	8.51877	14.9668	12.1058	2.22195	0.114037	0.137045	0.192063	0.265	31		11.6	50.9	369			5.11	3.22	1.1		4.33	2.24	1.12	4.28		0.528			5.2	9.4	151	0.4176	1.9	2.7	45.8	3.15		93.6	0.33	0.795	0.377
KAK1979-021-002	GL	GALA	COTTRELL, 2011; JENNER, 2012; REEKIE, 2019	EMP; FTIR; IMP; LA-ICPMS	1.6387	-94.9705	48.41	0.93	9.58	9.04	16.98	12.03	2.27	0.05	0.1		0.15	7.13	0.22	5.1	51.82	318.8	0.007	118.25	3.73	2.53	0.78	16.88	2.9	1.31	0.82	1.66	3.95	0.39		0.15	1.22	5.29	199.1	0.199	0.91	0.7	43.01	2	0.55	84.8	0.078817	0.53	0.0887832
KAK1979-021-001	GL	GALA	Jenner and O'Neil, 2012	LA-ICP-MS	1.64	-94.97	48.64	0.95	9.64	9.04	17.06	12.02	2.29	0.05	0.09			7.20407	0.242537	5.15023	53.0621	320.931	0.00803346	117.383	3.6998	2.50678	0.794666	17.1677	2.90409	1.28865	0.814903	1.6585	4.03919	0.38198	1430.15	0.307965	1.2382	5.34165	205.511	0.223979	0.914332	0.712171	43.1728	2.05227	0.85763	84.9733	0.0747419	0.538053	0.0895438
SON0160-020-001	GL	GALA	HAASE, 2011	EMP; ICPMS; TIMS	-11.146	-94.9624	48.54	2	7.99	7.12	17.58	10.46	3.37	1.06	0.46	0.14		208		39.07	33.9	172	0.211	36.9	5.58	3.13	1.69		5.42	3.87	1.13	18.69	5.1	0.432		1.59	31.2	21.49	116	1.24	5.02	21.1	26.8	5.2	1.34	293	1.66	0.91	2.05
SON0160-021-001	GL	GALA	HAASE, 2011	EMP; ICPMS; TIMS	-11.1533	-94.9508	49.78	2.02	8.81	5.98	16.69	9.63	3.36	1.16	0.44	0.17		293		40.17	33.4	112	0.254	29	5.92	3.41	1.71		5.5	3.69	1.22	19.26	6.99	0.49		1.48	29.4	21.56	121	1.56	5.07	25.1	29.7	5.23	1.31	281	1.52	0.94	2.18
KAK1979-020-001	GL	GALA	Jenner and O'Neil, 2012	LA-ICP-MS	1.64	-94.95	48.42	0.96	9.61	8.95	17.06	12.16	2.28	0.04	0.08			6.96625	0.214103	5.0778	51.6095	324.661	0.00716412	117.899	3.69827	2.46343	0.77542	16.9114	2.8589	1.27052	0.828015	1.6439	4.00312	0.369187	1422.76	0.302465	1.21345	5.25907	189.459	0.228659	0.902141	0.703681	42.6256	2.04483	0.832077	85.1136	0.0757805	0.534343	0.0862062
SON0160-019-001	GL	GALA	HAASE, 2011	EMP; ICPMS; TIMS	-10.9858	-94.8968	48.91	1.69	8.31	7.51	17.04	11.1	2.97	0.82	0.4	0.13		170		30.89	37.7	268	0.171	49.1	5.24	2.99	1.47		4.77	3.14	1.07	14.55	5.38	0.422		1.2	23.8	17.35	144	1.04	4.02	17.2	30.3	4.41	1.07	238	1.28	0.82	1.58
SON0160-019-004	GL	GALA	HAASE, 2011	EMP; ICPMS	-10.9858	-94.8968	48.86	1.68	8.31	7.48	17.07	11.06	2.93	0.81	0.39	0.16		166		30.2	38.5	269	0.17	48.7	5.07	2.92	1.42		4.65	3.03	1.03	14.19	5.18	0.41		1.17	23.3	16.85	160	1.11	3.9	16.7	29.6	4.28	1.14	234	1.25	0.8	1.55
TRI0164-017-001	GL	GALA9	Kelley, 2013	ICP-MS	2.57	-94.87	50.9341	1.88779	12.6806	6.9966	13.2209	10.7577	2.45782	0.190454		0.18043		43		15.73	45.75	158.4	0.052	77.8	7.06	4.61	1.41	18.89	5.67	3.17	1.57	6.02	8.79	0.672		0.531	7.5	12.56	82	0.575	2.47	4.03	45.42	4.21	0.977	93.6	0.4778	1.099	0.598
KAK1979-024-001	GL	GALA	Jenner and O'Neil, 2012	LA-ICP-MS	3.32	-94.84	50.07	1.28	10.18	8.36	15.43	11.8	2.32	0.1	0.1			16.7087	0.367445	8.42182	46.9415	349.014	0.0179685	84.429	4.7007	2.98851	1.02345	17.7459	3.81363	1.92831	1.03554	2.92602	5.18966	0.424127	1475.29	0.432395	2.98077	8.06067	151.142	0.372083	1.39583	1.73374	42.7968	2.91029	0.961058	89.9578	0.177407	0.668178	0.201626
KAK1979-024-003	GL	GALA	Jenner and O'Neil, 2012	LA-ICP-MS	3.32	-94.84	50.04	1.23	9.94	8.46	15.56	11.8	2.29	0.12	0.12			20.496	0.378616	8.74182	46.3846	339.549	0.0231247	82.5186	4.50622	2.88309	1.00977	17.7204	3.78744	1.83936	0.979914	3.12783	5.84603	0.404956	1447.99	0.47867	3.49091	7.88944	151.926	0.376564	1.42254	2.09602	41.7483	2.81668	0.997773	92.5894	0.202347	0.668485	0.250715
KAK1979-024-004	GL	GALA	Jenner and O'Neil, 2012	LA-ICP-MS	3.32	-94.84	49.96	1.26	9.92	8.52	15.4	11.84	2.33	0.12	0.13			20.38	0.342264	8.63886	47.4423	341.592	0.0229673	84.1671	4.50448	2.85263	0.971335	17.7118	3.70983	1.88583	0.959499	3.13308	4.99372	0.424355	1453.76	0.470307	3.46681	7.88858	157.636	0.368666	1.41182	2.12823	42.1389	2.7796	0.907462	92.6949	0.199652	0.646373	0.235271
KAK1979-024-005	GL	GALA	Jenner and O'Neil, 2012	LA-ICP-MS	3.32	-94.84	49.96	1.26	9.86	8.47	15.4	11.92	2.28	0.11	0.13			20.4218	0.397275	8.73131	46.8972	337.466	0.0232967	76.5312	4.55444	2.89405	1.01966	17.5757	3.76312	1.86701	0.998224	3.14428	5.09793	0.425926	1453.37	0.483175	3.50037	7.98277	152.833	0.37615	1.42754	2.1214	41.7887	2.72821	0.911572	92.6369	0.199451	0.651317	0.2382
SON0160-018-001	GL	GALA	HAASE, 2011	EMP; ICPMS; TIMS	-10.6836	-94.764	50.61	2.28	6.84	4.73	18.34	7.93	4.49	2.28	0.75	0.12		510		73.41	21.6	69	0.59	23.6	6.35	3.58	2.04		6.53	5.63	1.27	39.32	5.97	0.521		3.5	69.6	32.4	42.9	2.7	8.4	59.1	20.5	6.76	1.96	355	3.48	1.05	5.73
EWI0004-063-001	GL	GALA9	INGLE, 2010, CUSHMAN, 2004	EMP; XRF; ICP-MS; FTIR	2.592	-94.745	50.341	1.31562	10.2761	8.5172	14.28	12.4521	2.15783	0.0652932	0.104469	0.192866	0.172	15.3		7.58	44.9	343			4.62	2.92	0.948		3.73	1.78	1.01	2.53		0.481			2.4	7.19	113		1.35	1.44	44.5	2.62		69.2	0.17	0.714	0.188
EWI0004-063-002	GL	GALA9	INGLE, 2010, CUSHMAN, 2004	EMP; XRF; ICP-MS; FTIR	2.592	-94.745	49.1929	1.29046	10.5089	8.73473	15.183	11.9352	2.40837	0.0923439	0.11543	0.200748	0.211	22.6		9.27	48.1	295			4.66	2.82	0.984		3.74	2.05	1.03	3.48		0.456			3.8	8.12	115		1.58	2.43	44.7	2.74		92.3	0.25	0.689	0.25
SON0160-012-001	GL	GALA	HAASE, 2011	EMP; ICPMS	-10.2545	-94.6763	48.91	1.95	7.99	6.57	17.48	10.03	3.44	1.25	0.47	0.14		302		41.91	31.9	197	0.286	34.3	5.42	3.09	1.62		5.19	3.61	1.11	21.02	5.11	0.435		1.78	35.9	21.45	119	1.5	5.17	29.7	26.2	5.07	1.31	287	1.81	0.88	2.6
EWI0004-062-001	GL	GALA9	INGLE, 2010, CUSHMAN, 2004	EMP; XRF; ICP-MS; FTIR	2.582	-94.66	49.3372	1.29401	10.4224	8.70614	15.2238	11.9016	2.42003	0.0835394	0.106689	0.180163	0.215	21.4		8.97	52.2	297			4.33	2.73	0.954		3.6	1.85	0.949	3.19		0.446			4.3	7.61	116		1.52	1.96	45.6	2.57		93	0.24	0.668	0.263
SON0160-014-001	GL	GALA	HAASE, 2011	EMP; ICPMS; TIMS	-10.378	-94.648	50.62	1.65	9.27	6.87	16.5	8.63	3.56	1.59	0.53	0.17		421		54.69	32.3	211	0.323	36.9	5.69	3.32	1.7		5.44	3.94	1.17	28.77	7.4	0.506		1.97	36.3	25.37	134	2.166	6.44	32.1	22.3	5.39	1.18	335	1.87	0.91	3.42
SON0160-014-002	GL	GALA	HAASE, 2011	EMP; ICPMS	-10.378	-94.648	50.35	1.81	9.36	5.79	15.75	10.68	3.35	1.09	0.4	0.18		234		29.45	31.4	163	0.192	41.8	4.75	2.76	1.34		4.28	2.7	0.99	14.48	5.37	0.399		1.108	21.8	15.88	62.3	1.31	3.73	19.8	32.3	3.92	1	287	1.12	0.74	1.674
SON0160-014-004	GL	GALA	HAASE, 2011	EMP; ICPMS	-10.378	-94.648	50.17	1.71	8.88	5.57	16.86	9.61	3.65	1.49	0.53	0.17		379		48.48	34.5	269	0.289	39.1	5.23	3.06	1.55		4.93	3.43	1.08	25.4	6.34	0.458		1.77	32.4	22.67	153	1.96	5.69	28.7	23.2	4.96	1.11	320	1.6	0.84	3.09
SON0160-010-001	GL	GALA	HAASE, 2011	EMP; ICPMS; TIMS	-10.2057	-94.5017	49.13	2.06	8.14	6.58	17.77	10.01	3.39	1.2	0.49	0.16		294		42.7	34.2	161	0.283	32.4	5.82	3.29	1.74		5.6	3.86	1.18	21.1	6.12	0.46		1.72	35.4	22.6	122	1.44	5.39	28.5	27.3	5.41	1.33	290	1.85	0.94	2.54
SON0160-010-005	GL	GALA	HAASE, 2011	EMP; ICPMS	-10.2057	-94.5017	49.07	2.07	8.23	6.51	17.74	9.97	3.4	1.21	0.49	0.14		288		41.9	33.2	158	0.282	30.7	5.6	3.15	1.69		5.45	3.71	1.14	20.6	5.32	0.44		1.63	34.3	22	123	1.42	5.25	28.1	25.9	5.24	1.32	288	1.76	0.91	2.445
TRI0164-016-001	GL	GALA9	Kelley, 2013	ICP-MS	2.56	-94.45	51.1204	1.72201	12.0512	7.05332	13.4523	11.1449	2.45363	0.160747		0.21098		34.2		13.98	46.54	140.4	0.051	77.6	6.65	4.31	1.27	18.2	5.19	2.31	1.48	5.04	7.95	0.622		0.407	6.074	11.12	68.2	0.749	2.12	3.22	47.01	3.79	0.841	87.1	0.3853	0.992	0.49
SON0160-006-001	GL	GALA	HAASE, 2011	EMP; ICPMS; TIMS	-9.6801	-94.4269	51.22	1.17	8.51	8.34	15.33	12.92	1.99	0.29	0.18	0.17		54.46		13.21	43.1	358	0.041	85.2	3.94	2.45	0.95		3.36	1.85	0.86	5.52	4.68	0.361		0.655	6.99	8.62	122.8	0.578	1.93	4.34	43.1	2.61	0.62	125	0.385	0.61	0.46
SON0160-003-001	GL	GALA	HAASE, 2011	EMP; ICPMS; TIMS	-9.3866	-94.406	51.17	2.02	10.97	6.82	14.39	11.18	2.93	0.12	0.29	0.19		15.7		13.4	38.8	209	0.027	58.5	7.84	4.78	1.61		6.13	3.47	1.67	4.14	7.22	0.67		0.347	2.48	13.4	74.5	0.606	2.42	1.72	37.4	4.77	1.29	110	0.158	1.16	0.163
SON0160-003-002	GL	GALA	HAASE, 2011	EMP; ICPMS	-9.3866	-94.406	50.97	2.03	10.89	6.84	14.42	11.13	3	0.12	0.29	0.18		14.6		13.3	39.1	215	0.02	56.7	7.81	4.73	1.61		6.17	3.46	1.66	4.1	7.53	0.68		0.287	2.44	13.3	75.1	0.541	2.4	1.54	37.6	4.73	1.3	111	0.159	1.16	0.157
EWI0004-058-002	GL	GALA9	COLIN, 2011; CUSHMAN, 2004; GRAHAM, 2007; INGLE, 2010	CALC; EMP; FTIR; ICPMS; MS; TIMS; TIMS-ID; XRF	2.527	-94.348	50.4322	1.57939	11.7709	7.64665	13.8003	11.5593	2.42939	0.112508	0.0934219	0.207939	0.252	30.9		11.7	47.1	147			5.71	3.71	1.17		4.46	2.59	1.35	4.46		0.618			5.2	9.93	68.4	0.4257	1.87	3.29	43.8	3.38		74.4	0.34	0.893	0.355
EWI0004-056-002	GL	GALA9	INGLE, 2010, CUSHMAN, 2004	EMP; XRF; ICP-MS; FTIR	2.553	-94.238	50.2694	1.42978	10.9381	8.09005	14.1315	11.9939	2.34762	0.119319	0.098263	0.203545	0.227	28.8		10.1	47.4	224			5.1	3.29	1.05		4.23	2.11	1.13	3.76		0.547			4.4	8.57	92.4		1.68	2.59	45.8	2.96		77.5	0.31	0.789	0.351
TRI0164-015-003	GL	GALA9	Kelley, 2013	ICP-MS	2.52	-94.06												39.2		14.42	46.43	94.2	0.06	73.2	6.7	4.37	1.31	18.34	5.25	2.45	1.5	5.23	7.6	0.639		0.469	6.72	11.39	53.6	0.58	2.18	3.59	45.28	3.86	0.867	88.7		0.994	0.522
EWI0004-049-001	GL	GALA9	CUSHMAN, 2004; GRAHAM, 2007; INGLE, 2010	CALC; EMP; FTIR; ICPMS; MS; TIMS; TIMS-ID; XRF	2.5	-93.868	50.7526	1.75942	12.2487	7.20304	13.4726	11.0575	2.5849	0.15504	0.11477	0.220479	0.308	40.4		14.3	45	66			5.83	3.89	1.29		4.89	2.84	1.43	5.51		0.656			7.2	11.6	53.4	0.4829	2.18	4.08	43.4	3.81		84.8	0.44	0.956	0.442
KAK1979-025-001	GL	GALA	Jenner and O'Neil, 2012	LA-ICP-MS	3.52	-93.79	50.28	1.17	9.66	8.48	15.61	12.1	2.1	0.15	0.12			34.7028	0.371106	10.7992	48.0337	385.665	0.0367714	88.5879	3.8982	2.53233	0.954559	16.2861	3.36472	1.75352	0.839116	4.1316	5.20321	0.372935	1487.17	0.542603	5.52641	7.99612	151.036	0.381016	1.6129	3.51322	38.9848	2.64089	0.773473	100.943	0.309928	0.573224	0.388943
EWI0004-050-001	GL	GALA9	CUSHMAN, 2004; GRAHAM, 2007; INGLE, 2010; ROTELLA, 2009	CALC; EMP; FTIR; ICPMS; MS; TIMS; XRF	2.502	-93.777	50.2393	1.31634	10.1384	8.52545	14.3605	12.3601	2.23758	0.130961	0.10297	0.191943	0.216	39		10.8	48.8	315			4.48	2.8	0.994		3.86	1.91	0.963	4.37		0.458			6.2	8.45	89		1.69	3.21	48.8	2.75		88.9	0.37	0.702	0.438
TRI0164-014-001	GL	GALA9	Kelley, 2013	ICP-MS	2.47	-93.76	49.95	1.64	12.17	6.6	13.58	11.09	2.55	0.15		0.2		45.3		15.29	49.38	111	0.052	89.5	6.99	4.55	1.44	20.24	5.59	2.65	1.58	5.73	7.15	0.659		0.476	7.16	12.14	61.4	0.559	2.37	3.81	51.96	4.1	0.948	106.9	0.4555	1.08	0.544
KAK1979-002-043	GL	GALA	Jenner and O'Neil, 2012	LA-ICP-MS	1.38	-93.72	48.48	2.09	8.68	6.61	17.95	10.8	3.45	0.81	0.38			209.118	1.34727	44.7945	37.8934	171.96	0.208179	61.7667	5.42855	3.1091	1.86075	17.359	5.56027	4.23983	1.10837	19.6088	6.35704	0.444533	1353.49	1.76652	31.7513	24.2518	96.0114	1.39563	5.65819	20.9067	30.1421	5.61305	1.801	316.151	1.70219	0.887285	1.93882
EWI0004-048-004	GL	GALA9	CUSHMAN, 2004; INGLE, 2010	CALC; EMP; FTIR; ICPMS; TIMS; TIMS-ID; XRF	2.488	-93.655	50.5326	1.67111	11.7079	7.3529	13.7567	11.4561	2.54521	0.164756	0.126581	0.240101	0.299	45.9		14.2	47.5	94.9			5.84	3.65	1.3		4.93	2.62	1.26	5.51		0.592			7.4	11.1	58	0.4535	2.27	3.75	48.4	3.61		92.7	0.47	0.914	0.527
KAK1979-027-002	GL	GALA	Jenner and O'Neil, 2012	LA-ICP-MS	3.35	-93.64	49.55	2.02	9.5	6.42	16.95	9.68	3.4	1.08	0.31			268.639	1.23307	49.2461	38.8048	188.62	0.297499	56.0441	4.74615	2.72094	1.68069	18.2344	5.11513	3.89246	0.969942	23.682	7.00091	0.379185	1370.98	1.9861	39.6058	23.6007	96.8903	1.52146	5.77446	30.0115	26.9741	5.24047	1.57453	372.303	2.14834	0.759421	2.97568
KAK1979-027-003	GL	GALA	Jenner and O'Neil, 2012	LA-ICP-MS	3.35	-93.64	49.88	2.13	9.51	6.43	16.99	9.56	3.42	1.07	0.34			274.675	1.28628	50.4244	38.1288	179.759	0.307449	54.2912	4.78901	2.76197	1.76745	17.91	5.08777	4.092	0.993046	24.4015	6.65738	0.386136	1383.56	1.97605	41.125	23.959	98.3847	1.56205	5.91384	31.2694	26.3758	5.08643	3.28637	381.987	2.23897	0.79475	2.96098
EWI0004-045-002	GL	GALA9	CUSHMAN, 2004; GRAHAM, 2007; INGLE, 2010; SALTERS, 2011	CALC; EMP; FTIR; ICPMS; MC-ICP-MS; MS; TIMS; TIMS-ID; XRF	2.443	-93.352	50.0111	1.24668	10.0036	8.83203	14.8057	12.1718	2.25286	0.0892225	0.074185	0.179447	0.2	25.6		8.95	49.8	382			4.51	2.84	0.963		3.56	1.93	1.04	3.43		0.457			4.2	7.46	158	0.3327	1.45	2.57	42.7	2.63		76.3	0.28	0.701	0.29
TRI0164-013-001	WR	GALA9	Kelley, 2013	ICP-MS	2.42	-93.34	50.9774	1.52203	11.739	7.20295	13.3612	11.7903	2.38774	0.18108	0.1509			42.1		12.83	45.6	139.1	0.047	83.5	5.76	3.77	1.2	18.05	4.61	2.02	1.29	5.08	7.24	0.545		0.42	6.45	9.97	67.6	0.505	1.98	3.62	46.76	3.39	0.662	97.9	0.4179	0.879	0.503
EWI0004-038-002	GL	GALA	CUSHMAN, 2004; GRAHAM, 2007; INGLE, 2010	CALC; EMP; FTIR; ICPMS; MS; TIMS; TIMS-ID; XRF	2.354	-93.268	50.84	1.706		6.715	13.838	11.28	2.327	0.147	0.158	0.217	0.296	40.5		13.5	46.4	201			6.01	3.75	1.26		5.07	2.55	1.31	5.12		0.615			6	10.9	79.1	0.4739	2.18	3.5	44.8	3.68		81	0.42	0.938	0.481
EWI0004-043-001	GL	GALA	CUSHMAN, 2004; GRAHAM, 2007; INGLE, 2010; ROTELLA, 2009	CALC; EMP; FTIR; ICPMS; MS; TIMS; XRF	2.414	-93.257	50.405	0.878		8.702	14.874	13.498	1.91	0.043	0.054	0.178	0.101	13.5		5.3	48.4	338	0.02		3.34	2.1	0.722		2.7	1.19	0.729	1.83		0.343			2	5.06	97.9	0.28	0.94	1.33	48.3	1.86		67.6	0.14	0.513	0.146
EWI0004-041-001	GL	GALA10	INGLE, 2010; CUSHMAN, 2004	EMP; XRF; ICP-MS; TIMS-ID; FTIR	2.313	-93.093	50.4938	1.38175	11.0569	7.90631	14.0243	12.0414	2.26244	0.122901	0.126898	0.19884	0.219	33.6		11.2	48.7	206			5.29	3.31	1.06		4.22	2.24	1.19	4.35		0.557			5.5	9.21	83.5		1.74	3.26	50.1	3		77.7	0.37	0.779	0.367
EWI0004-041-007	GL	GALA10	CUSHMAN, 2004; INGLE, 2010	CALC; EMP; FTIR; ICPMS; TIMS; TIMS-ID; XRF	2.313	-93.093	50.2	1.23091	10.5051	8.38554	14.3695	12.31	2.20469	0.106684	0.114661	0.212372	0.198	29.5		9.34	48	259			4.5	2.9	0.939		3.65	1.77	0.984	3.56		0.485			4.8	7.58	91.7	0.3009	1.51	2.48	50.4	2.61		72.5	0.29	0.687	0.328
EWI0004-033-001	GL	GALA10	CUSHMAN, 2004; GRAHAM, 2007; INGLE, 2010; ROTELLA, 2009	CALC; EMP; FTIR; ICPMS; MS; TIMS; XRF	2.282	-92.973	50.491	1.599	12.575	6.693	13.658	10.852	2.293	0.144	0.133	0.227	0.269	40.5		12.2	48.8	52			5.43	3.43	1.17		4.63	2.27	1.18	4.71		0.563			6.6	9.82	54.2		1.97	3.26	44.2	3.28		78.7	0.39	0.838	0.441
TRI0164-023-002	GL	GALA10	Kelley, 2013	ICP-MS	2.29	-92.9	50.35	1.64	11.63	6.7	13.92	10.78	2.68	0.2		0.2		49.3		15.19	44.88	83.4	0.054	80.5	6.24	4.02	1.35	18.81	5.21	2.34	1.37	6.19	8.73	0.582		0.497	7.92	11.81	54.4	0.517	2.38	4.47	46.53	3.89	0.796	100.5	0.4915	0.973	0.58
TRI0164-012-004	GL	GALA10	Kelley, 2013	ICP-MS	2.25	-92.69												36.3		12.32	43.99	242	0.046	106.3	5.12	3.28	1.1	16.29	4.18	1.76	1.13	4.47	5.26	0.467		0.41	5.831	9.35	78.5	0.634	1.83	2.87	44.11	3.12	0.617	106.4		0.765	0.433
EWI0004-029-001	GL	GALA10	COLIN, 2011; CUSHMAN, 2004; GRAHAM, 2007; INGLE, 2010; ROTELLA, 2009; SALTERS, 2011	CALC; EMP; FTIR; ICPMS; IGN; MC-ICP-MS; MS; TIMS; TIMS-ID; XRF	2.204	-92.618	50.6045	1.71336	11.4706	7.50507	13.7834	11.5353	2.45023	0.156263	0.135092	0.213728	0.301	46.7		13.6	46.9	94.4			5.35	3.32	1.16		4.18	2.37	1.28	5.56		0.549			6.8	11.1	58.1	0.5204	2.27	4.7	47.6	3.31		93.8	0.43	0.866	0.53
EWI0004-028-001	GL	GALA10	CUSHMAN, 2004; GRAHAM, 2007; INGLE, 2010	CALC; EMP; FTIR; ICPMS; MS; TIMS; TIMS-ID; XRF	2.187	-92.52	50.2095	1.61699	10.6319	7.71436	14.1364	12.1313	2.46831	0.216833	0.144219	0.207757	0.328	62.7		15.2	45.3	210			5.07	3.05	1.18		4.54	2.32	1.07	6.35		0.492			8.7	10.9	70.6	0.5141	2.32	5.28	50.2	3.35		132	0.551	0.794	0.611
EWI0004-025-001	GL	GALA10	CUSHMAN, 2004; GRAHAM, 2007; INGLE, 2010; KOKFELT, 2005; SALTERS, 2011	CALC; EMP; FTIR; ICPMS; MC-ICP-MS; MS; TIMS; TIMS-ID; XRF	2.145	-92.322	49.7058	1.65518	9.83709	7.73971	14.9842	12.229	2.60022	0.275292	0.183528	0.180503	0.383	79.3		18	45	244			4.77	2.85	1.22		4.53	2.53	1.03	7.61		0.446			11.1	12	93.6	0.6077	2.64	6.73	43.1	3.49		160	0.679	0.777	0.742
TRI0164-011-001	GL	GALA10	Kelley, 2013	ICP-MS	2.09	-92.24	49.7403	2.0672	11.1771	6.71244	13.8985	11.7581	3.12598	0.332351		0.191354		71.3		20.49	41.53	126	0.082	101.4	6.06	3.72	1.44	17.82	5.28	2.8	1.3	8.31	7.09	0.517		0.698	11.27	14.13	60.4	0.861	2.91	6.19	43.02	4.22	1.03	152.3	0.7243	0.951	0.891
SON0158-054-001	GL	GALA11	CHRISTIE, 2005	ICP-MS	2.11	-92.11												43.8		12.8	47	397	0.06		5.2	3.3	1.22		4.2	2.3	1.1	5		0.5			7.1	9.9	96	0.6	2.3	3.9	47	3.3		129	0.5	0.79	0.5
EWI0004-020-001	GL	GALA11	INGLE, 2010; CUSHMAN, 2004	EMP; XRF; ICP-MS; TIMS-ID; FTIR	2.117	-92.012	48.3962	1.70364	9.56938	8.47878	15.9801	11.9552	2.68718	0.26865	0.194471	0.164398	0.441	75.1		20.2	46.7	259			4.91	2.87	1.33		4.79	2.77	1.03	8.5		0.452			11.8	13.6	116	0.6555	2.96	6.37	40	3.9		191	0.707	0.798	0.8
EWI0004-019-001	GL	GALA11	INGLE, 2010; CUSHMAN, 2004	EMP; XRF; ICP-MS; TIMS-ID; FTIR	2.111	-91.957	50.426	2.731	13.488	4.784	13.344	9.046	3.285	0.464	0.338	0.216	0.819	128		34.8	44.5	57.7			9.88	5.41	2		7.92	5.18	2.09	15.5		0.856			21.3	25.2	37.9	0.878	5.34	13.6	44.4	6.73		142	1.31	1.51	1.41
SON0208-058-001	GL	GALA	HERBRICH, 2016	CALC; EMP; LA-ICPMS; TIMS	2.18	-91.95	50.11	1.69	11.42	6.67	14.42	11.58	2.74	0.18	0.16	0.21		40.907		13.997	42.331	119.628	0.04	118.596	5.721	3.534	1.41	17.277	4.82	2.55	1.24	5.564		0.53			6.795	11.405	59.666	0.516	2.211	3.805	46.342	3.742	103.894	121.233	0.423	0.832	0.512
SON0208-058-002	GL	GALA	HERBRICH, 2016	CALC; EMP; LA-ICPMS; TIMS	2.18	-91.95	50.07	1.68	11.51	6.71	14.25	11.52	2.72	0.19	0.15	0.21		40.217		13.67	43.01	121.435	0.04	119.514	5.358	3.3	1.351	17.371	4.582	2.359	1.142	5.364		0.482			6.73	11.041	60.851	0.512	2.147	3.831	44.946	3.573	100.402	116.759	0.4	0.776	0.482
SON0208-058-004	GL	GALA	HERBRICH, 2016	EMP; LA-ICPMS	2.18	-91.95	49.9	1.73	11.89	6.37	14.27	11.21	2.79	0.21	0.15	0.19		48.548		15.423	42.395	79.336	0.049	116.595	5.721	3.588	1.419	17.269	4.854	2.601	1.246	6.309		0.541			8.296	11.983	51.889	0.547	2.376	4.621	45.728	3.777	103.667	119.514	0.513	0.833	0.619
SON0208-058-005	GL	GALA	HERBRICH, 2016	CALC; EMP; LA-ICPMS; TIMS	2.18	-91.95	49.88	1.74	11.67	6.29	14.26	11.19	2.8	0.21	0.16	0.2		48.72		15.542	42.689	79.281	0.045	115.675	5.719	3.59	1.445	17.386	4.894	2.564	1.235	6.356		0.53			8.286	12.053	53.121	0.542	2.385	4.617	45.636	3.826	102.036	120.083	0.509	0.829	0.622
SON0208-048-001	GL	GALA	HERBRICH, 2016	CALC; EMP; LA-ICPMS; TIMS	2.14	-91.95	49.62	2.46	12.98	5.19	13.46	9.58	3.09	0.44	0.31	0.18		95.668		31.199	38.086	86.547	0.105	87.394	9.156	5.608	2.099	19.702	8.009	4.964	1.988	13.433		0.785			18.261	21.949	42.34	0.945	4.593	10.249	39.373	6.571	108.406	142.676	1.018	1.345	1.427
SON0208-048-002	GL	GALA	HERBRICH, 2016	CALC; EMP; LA-ICPMS; TIMS	2.14	-91.95	50.11	2.47	13.04	5.2	13.72	9.57	3.08	0.45	0.3	0.2		96.872		30.698	37.439	85.116	0.102	85.13	9.139	5.682	2.099	19.398	8.023	5.13	1.939	13.417		0.841			18.645	22.214	41.649	0.967	4.563	9.997	40.855	6.503	125.785	141.855	1.189	1.324	1.45
SON0208-048-003	GL	GALA	HERBRICH, 2016	EMP; LA-ICPMS	2.14	-91.95	50.21	2.49	13	5.22	13.7	9.65	3.11	0.45	0.3	0.23		97.996		31.5	39.206	94.494	0.101	90.392	8.736	5.407	2.105	19.787	7.819	4.872	1.889	13.529		0.805			18.611	22.116	44.178	0.986	4.585	10.07	40.399	6.396	125.633	141.24	1.174	1.295	1.431
SON0208-048-004	GL	GALA	HERBRICH, 2016	EMP; LA-ICPMS	2.14	-91.95	50.21	2.49	13.02	5.19	13.67	9.62	3.12	0.45	0.3	0.22		99.7		32.023	39.795	92.049	0.107	91.907	8.881	5.463	2.124	20.196	7.837	4.936	1.903	13.759		0.806			19.016	22.452	43.896	0.996	4.665	10.426	40.599	6.504	130.283	143.85	1.201	1.303	1.459
SON0208-048-006	GL	GALA	HERBRICH, 2016	EMP; LA-ICPMS	2.14	-91.95	50.15	2.54	13.16	5.08	13.56	9.54	3.1	0.45	0.3	0.26		98.832		31.796	39.597	94.226	0.107	90.274	8.741	5.409	2.111	19.802	7.76	4.96	1.889	13.598		0.809			18.803	22.312	44.41	0.994	4.596	10.2	40.457	6.446	129.186	140.932	1.174	1.294	1.431
SON0208-048-007	GL	GALA	HERBRICH, 2016	EMP; LA-ICPMS	2.14	-91.95	49.92	2.53	13.28	5.04	13.57	9.55	3.16	0.46	0.29	0.22		98.821		31.531	37.56	87.942	0.104	88.152	8.792	5.416	2.105	19.707	7.798	4.901	1.9	13.682		0.806			18.683	22.238	38.637	0.974	4.602	10.064	40.032	6.48	125.732	142.989	1.196	1.298	1.451
SON0208-046-001	GL	GALA	HERBRICH, 2016	CALC; EMP; LA-ICPMS; TIMS	2.12	-91.95	49.77	1.82	10.86	6.56	14.34	11.82	2.59	0.39	0.18	0.16		96.345		23.074	43.788	155.685	0.095	118.804	5.851	3.557	1.58	20.159	5.474	3.186	1.275	9.831		0.493			13.956	15.337	63.675	0.814	3.214	9.103	41.919	4.419	87.611	177.16	0.8	0.937	1.019
SON0208-045-001	GL	GALA	HERBRICH, 2016	CALC; EMP; LA-ICPMS; TIMS	2.11	-91.95	50.09	2.75	13.91	4.56	13.42	8.9	3.24	0.56	0.32	0.17		129.857		34.66	38.771	43.047	0.145	59.319	10.027	5.505	2.212	21.085	7.826	4.889	1.918	14.793		0.824			21.629	23.356	27.965	1.214	4.951	13.673	38.153	6.606	130.671	146.441	1.167	1.315	1.61
SON0208-045-002	GL	GALA	HERBRICH, 2016	EMP; LA-ICPMS	2.11	-91.95	50.61	2.74	14.07	4.55	13.5	8.92	3.25	0.56	0.3	0.24		131.276		34.932	38.87	43.13	0.145	60.438	10.319	5.732	2.255	21.208	8.166	5.102	1.987	15.155		0.864			22.434	23.953	28.011	1.261	5.05	13.605	39.042	6.799	148.272	149.394	1.378	1.367	1.673
SON0208-045-003	GL	GALA	HERBRICH, 2016	EMP; LA-ICPMS	2.11	-91.95	50.23	2.72	14.08	4.55	13.33	8.87	3.27	0.54	0.31	0.21		129.515		34.071	37.625	42.126	0.141	57.827	10.199	5.735	2.251	20.42	8.161	5.082	1.976	15.113		0.849			21.571	23.808	27.109	1.199	4.985	13.232	38.872	6.829	125.934	147.834	1.189	1.355	1.638
SON0208-045-004	GL	GALA	HERBRICH, 2016	EMP; LA-ICPMS	2.11	-91.95	50.65	2.7	14.1	4.54	13.55	8.9	3.24	0.56	0.33	0.22		130.007		34.371	37.547	41.645	0.141	58.165	10.324	5.825	2.262	20.705	8.272	5.168	2.035	15.297		0.874			22.105	24.149	27.086	1.236	5.034	13.473	39.52	6.84	142.61	148.815	1.381	1.381	1.694
SON0208-045-005	GL	GALA	HERBRICH, 2016	EMP; LA-ICPMS	2.11	-91.95	50.78	2.76	14.29	4.54	13.58	8.91	3.28	0.55	0.34	0.26		129.464		34.292	37.561	41.788	0.142	58.576	10.03	6.253	2.255	20.8	8.631	5.572	2.151	15.327		0.945			22.077	24.281	26.694	1.221	5.01	13.366	40.83	7.002	144.375	148.388	1.402	1.451	1.718
SON0208-060-001	GL	GALA	HERBRICH, 2016	CALC; EMP; LA-ICPMS; TIMS	2.21	-91.94	49.66	1.6	10.56	6.95	14.84	12.17	2.65	0.26	0.15	0.16		65.989		16.853	42.247	271.689	0.064	115.483	5.839	3.593	1.351	16.808	5.152	2.868	1.265	7.633		0.536			9.809	12.69	77.777	0.774	2.505	6.186	48.366	3.846	87.976	142.29	0.608	0.862	0.824
SON0208-060-002	GL	GALA	HERBRICH, 2016	CALC; EMP; LA-ICPMS; TIMS	2.21	-91.94	49.67	1.62	10.47	6.91	14.76	12.15	2.62	0.26	0.18	0.19		67.05		17.382	43.958	277.967	0.066	119.982	5.72	3.481	1.359	16.983	4.998	2.739	1.246	7.635		0.528			10.091	12.677	79.529		2.544	6.261	47.444	3.903	90.347	143.517	0.619	0.846	0.815
SON0208-060-003	GL	GALA	HERBRICH, 2016	CALC; EMP; LA-ICPMS; TIMS	2.21	-91.94	49.49	1.59	10.59	7.04	14.68	12.01	2.62	0.26	0.14	0.18		65.763		16.972	43.078	272.051	0.064	115.114	5.713	3.451	1.329	16.541	4.989	2.754	1.239	7.566		0.519			9.907	12.607	78.999	0.647	2.501	6.151	48.473	3.813	87.663	138.76	0.608	0.846	0.817
SON0208-060-004	GL	GALA	HERBRICH, 2016	EMP; LA-ICPMS	2.21	-91.94	49.94	1.63	10.31	7	14.89	12.24	2.66	0.25	0.18	0.15		63.999		16.631	42.077	270.072	0.058	113.554	5.59	3.394	1.314	16.149	4.897	2.669	1.198	7.402		0.506			9.766	12.334	76.988	0.649	2.454	5.946	48.017	3.735	85.108	139.032	0.597	0.824	0.786
ODP0206-1256D-014R-001/139-142	GL	GALA	GELDMACHER, 2013	LA-ICPMS; TIMS	6.7361	-91.9344												17		12.2	44.3		0.02	70.2	4.46	2.9	0.85	15.3	3.48	1.71	0.96	2.51	4.96	0.45	1410		2.89	11.2	49.6	0.42	1.15	1.6	46.9	2.31		75.2	0.17	0.63	0.21
ODP0206-1256D-017R-001/065-068	GL	GALA	GELDMACHER, 2013	LA-ICPMS; TIMS	6.7361	-91.9344												40.3		17.3	39.1		0.05	79.1	5.76	3.52	1.42	17.9	4.99	2.78	1.21	6.5	5.65	0.52	1481		7.93	13.1	69.3	0.75	2.64	4.1	42.9	3.99		141	0.47	0.85	0.51
ODP0206-1256D-018R-001/081-084	GL	GALA	GELDMACHER, 2013	LA-ICPMS; TIMS	6.7361	-91.9344												12		7.14	46.6		0.02	89.4	5.18	3.43	1	16	4.09	2	1.13	2.41	5.49	0.53	1485		2.3	7.03	54.2	0.35	1.24	1.19	48.7	2.66		75	0.14	0.73	0.16
ODP0206-1256D-020R-001/033-037	GL	GALA	GELDMACHER, 2013	LA-ICPMS; TIMS	6.7361	-91.9344												12.4		7.32	47.4		0.02	92.3	4.86	3.13	1.03	16.6	3.86	1.81	1.04	2.41	5.57	0.5	1620		2.39	7.18	55.4	0.33	1.27	1.23	46.3	2.67		75.5	0.15	0.7	0.16
ODP0206-1256D-021R-001/116-119	GL	GALA	GELDMACHER, 2013	LA-ICPMS; TIMS	6.7361	-91.9344												13.8		8.01	46.5		0.01	85.5	5.02	3.24	1.08	17.2	4	1.88	1.08	2.64	5.7	0.5	1639		2.65	7.71	48.7	0.38	1.38	1.37	45.5	2.86		77.6	0.17	0.72	0.17
ODP0206-1256D-023R-002/016-020	GL	GALA	BRANDL, 2013; GELDMACHER, 2013	EMP; LA-ICPMS; TIMS	6.7361	-91.9344	51.72	1.25	11.63	7.09	13.69	11.6	2.13	0.08	0.09	0.2				30.4	33.2		3.06	48.2	17.22	11.1	2.86	21.8	14	8.05	3.67	10.6	12.2	1.7	1725		10.5	28.1	23.6	1.07	5.17	5.39	40.6	9.82		86.9	0.61	2.46	0.81
ODP0206-1256D-030R-001/044-059	GL	GALA	GELDMACHER, 2013	LA-ICPMS; TIMS	6.7361	-91.9344												11.5		6.8	56.6		0.01	92.8	4.63	2.96	0.97	16.5	3.67	1.69	0.99	2.27	5.39	0.46	1693		2.21	6.8	101	0.3	1.19	1.14	46.6	2.56		74.2	0.14	0.67	0.14
ODP0206-1256D-038R-001/121-124	GL	GALA	GELDMACHER, 2013	LA-ICPMS; TIMS	6.7361	-91.9344												18.3		6.56	46.5		0.02	105	3.88	2.48	0.83	15.4	3.06	1.41	0.83	2.41	4.49	0.39	1473		2.95	5.96	87.3		1.09	1.67	45.4	2.13		76.3	0.18	0.55	0.2
ODP0206-1256D-040R-001/031-036	GL	GALA	GELDMACHER, 2013	LA-ICPMS; TIMS	6.7361	-91.9344												16.7		6.63	46.9		0.02	106	4.19	2.72	0.85	15.6	3.38	1.6	0.91	2.46	4.61	0.43	1506		2.8	6.2	79.7	0.36	1.1	1.56	47.5	2.26		78.5	0.18	0.61	0.2
ODP0206-1256D-043R-001/009-012	GL	GALA	GELDMACHER, 2013	LA-ICPMS; TIMS	6.7361	-91.9344												16.3		6.43	43.8		0.02	104	3.65	2.3	0.83	14.7	2.94	1.34	0.79	2.34	4.35	0.36	1441		2.77	5.84	75.6	0.31	1.06	1.44	42.5	2.13		77.6	0.16	0.53	0.18
ODP0206-1256D-051R-002/060-064	GL	GALA	GELDMACHER, 2013	LA-ICPMS; TIMS	6.7361	-91.9344												19.7		7.05	46.2		0.02	104	4.08	2.61	0.84	14.8	3.19	1.54	0.87	2.62	4.59	0.41	1365		3.26	6.06	90.2	0.28	1.14	1.8	45.7	2.18		76	0.18	0.58	0.22
ODP0206-1256D-062R-001/010-012	GL	GALA	GELDMACHER, 2013	LA-ICPMS; TIMS	6.7361	-91.9344												19.7		6.98	46		0.02	105	3.96	2.56	0.83	15	3.21	1.5	0.86	2.61	4.51	0.4	1454		3.18	6.09	90.1	0.27	1.13	1.83	45.5	2.24		74.4	0.2	0.57	0.23
ODP0206-1256D-074R-002/102-111	WR	GALA	BUSIGNY, 2005; COOPER, 2007; GAO, 2012; GELDMACHER, 2013	ICPMS; MC-ICP-MS; MS; TIMS	6.7361	-91.9344												7		7.58					5.52	3.48	1.15		4.18	2.03	1.2	2.3	4.05	0.55			1.9	7.77		0.24	1.41		47.4	2.92		74	0.13	0.79	0.15
206-1256D13R3W-25/26.5	Tholeiite	GALA	Shimizu et al., 2019	SIMS	6.73605	-91.9343	50.3499	1.75562	11.5598	7.29307	13.8006	11.8014	2.77742	0.265291	0.188531	0.208383	0.594599	41.5125		18.9766	43.5584	271.067		82.7425	6.21542	3.80848	1.47113	18.4401	5.49991	3.06023	1.32533	6.8647		0.521373			7.42863	13.406	76.1889	0.63263	2.76791	4.09472	44.4661	4.30839		145.814	0.435103	0.904059	0.523338
206-1256D20R1W-37/40	Tholeiite	GALA	Shimizu et al., 2019	SIMS	6.73605	-91.9343	51.1061	1.39106	13.4921	6.98083	12.7877	11.4783	2.35262	0.0837541	0.0973056	0.230327	0.365582	13.9368		8.56885	52.0788	67.7275		89.8847	5.4886	3.49651	1.16381	16.8754	4.3754	1.97096	1.18185	2.82686		0.505705			2.57084	8.17149	53.2902	0.337092	1.43334	1.36301	47.8518	3.09933		82.0884	0.16412	0.7494	0.173854
206-1256D30R1W-12/14	Tholeiite	GALA	Shimizu et al., 2019	SIMS	6.73605	-91.9343	51.9218	1.02734	11.8048	7.74249	13.1157	12.0093	2.00256	0.0849072	0.0849176	0.206294	0.269717	18.6762		7.0093	51.4172	263.715		109.231	3.7352	2.4765	0.876347	14.6361	3.13132	1.386	0.817093	2.45466		0.364253			2.77157	5.86266	90.5646	0.268799	1.12233	1.63688	45.2999	2.3967		79.7279	0.158228	0.566357	0.19237
206-1256D51R1W-118/120	Tholeiite	GALA	Shimizu et al., 2019	SIMS	6.73605	-91.9343	51.419	1.54484	13.6239	6.66573	12.8048	10.9699	2.5009	0.114855	0.122646	0.233384	0.341142	18.9821		10.8704	51.6433	49.4383		84.2435	5.75584	3.67195	1.27201	17.3036	4.86295	2.34267	1.21459	3.61629		0.559544			3.47822	9.68875	46.4634	0.413671	1.74067	1.9646	44.9772	3.3731		91.3891	0.227353	0.828004	0.243405
ODP0206-1256C-006R-001/050-053	GL	GALA	GELDMACHER, 2013	LA-ICPMS; TIMS	6.7363	-91.9343												17.6		12.1	44.7		0.02	70.4	5.51	3.56	1.18	17.7	4.54	2.25	1.19	3.38	5.76	0.55	1620		3.64	11.3	43.6	0.43	1.65	1.88	43.6	3.25		84	0.23	0.81	0.24
SON0208-066-001	GL	GALA	HERBRICH, 2016	CALC; EMP; LA-ICPMS; TIMS	2.32	-91.93	50.54	1.17	10.3	7.6	14.67	12.71	2.16	0.12	0.09	0.18		28.62		8.932	45.212	275.736	0.028	126.341	4.287	2.731	0.948	15.208	3.502	1.624	0.948	3.685		0.408			4.602	7.477	92.947	0.336	1.414	2.622	48.002	2.536	85.764	91.027	0.28	0.628	0.347
SON0208-066-002	GL	GALA	HERBRICH, 2016	CALC; EMP; LA-ICPMS; TIMS	2.32	-91.93	50.54	1.14	10.43	7.57	14.64	12.73	2.17	0.12	0.09	0.18		27.004		8.376	42.796	263.652	0.022	118.689	3.89	2.487	0.886	14.074	3.174	1.495	0.869	3.441		0.388			4.415	6.914	87.674	0.344	1.313	2.469	45.493	2.346	80.391	86.905	0.265	0.573	0.325
SON0208-061-001	GL	GALA	HERBRICH, 2016	CALC; EMP; LA-ICPMS; TIMS	2.27	-91.93	50.09	1.51	11.17	6.74	14.23	12.02	2.43	0.17	0.12	0.19		40.734		12.767	43.431	207.675	0.043	101.017	5.563	3.505	1.234	16.184	4.592	2.304	1.227	5.356		0.533			6.776	10.344	64.073	0.524	1.99	3.924	47.08	3.337	90.966	101.888	0.392	0.805	0.536
SON0208-061-002	GL	GALA	HERBRICH, 2016	EMP; LA-ICPMS	2.27	-91.93	50.44	1.54	11.29	6.71	14.35	12.04	2.42	0.18	0.12	0.22		41.592		13.043	44.151	200.769	0.042	103.259	5.756	3.633	1.245	17.036	4.771	2.433	1.285	5.474		0.563			6.934	10.666	64.698	0.558	2.012	4.156	50.144	3.496	101.825	104.66	0.416	0.841	0.55
SON0208-061-003	GL	GALA	HERBRICH, 2016	EMP; LA-ICPMS	2.27	-91.93	50.43	1.54	11.23	6.71	14.35	11.97	2.46	0.17	0.13	0.2		41.153		12.905	44.033	205.342	0.048	96.425	5.59	3.505	1.245	16.743	4.663	2.292	1.241	5.326		0.541			6.768	10.326	63.856	0.544	2.007	4.116	48.46	3.408	101.409	102.651	0.414	0.817	0.532
SON0208-061-004	GL	GALA	HERBRICH, 2016	EMP; LA-ICPMS	2.27	-91.93	50.31	1.53	11.35	6.73	14.36	12.03	2.43	0.18	0.12	0.2		42.191		13.263	45.413	202.096	0.048	105.462	6.107	3.865	1.301	17.491	5.02	2.52	1.36	5.699		0.597			7.008	11.015	67.223	0.546	2.091	4.218	50.852	3.616	102.067	106.085	0.444	0.891	0.579
SON0208-061-005	GL	GALA	HERBRICH, 2016	EMP; LA-ICPMS	2.27	-91.93	50.18	1.53	11.22	6.69	14.42	12.02	2.46	0.18	0.13	0.19		44.029		13.902	47.245	210.46	0.046	108.205	6.059	3.83	1.318	17.919	5.046	2.503	1.331	5.785		0.585			7.243	11.342	69.023	0.574	2.153	4.343	50.033	3.718	104.733	107.611	0.44	0.879	0.563
SON0208-061-006	GL	GALA	HERBRICH, 2016	CALC; EMP; LA-ICPMS; TIMS	2.27	-91.93	50.25	1.51	11.36	6.78	14.42	12.01	2.48	0.18	0.12	0.22		38.613		12.268	44.766	205.522	0.04	102.906	5.364	3.368	1.164	16.497	4.389	2.217	1.178	5.002		0.519			6.614	9.753	66.231	0.526	1.884	3.945	47.977	3.268	97.355	98.515	0.401	0.781	0.523
SON0208-061-007	GL	GALA	HERBRICH, 2016	EMP; LA-ICPMS	2.27	-91.93	50.23	1.52	11.24	6.79	14.37	12	2.47	0.17	0.12	0.21		40.097		12.623	44.68	204.533	0.044	104.698	5.641	3.524	1.207	16.604	4.644	2.331	1.241	5.274		0.543			6.766	10.261	66.254	0.504	1.939	3.978	49.397	3.366	98.701	99.762	0.416	0.817	0.532
SON0208-061-008	GL	GALA	HERBRICH, 2016	EMP; LA-ICPMS	2.27	-91.93	50.3	1.53	11.19	6.78	14.41	12.04	2.49	0.18	0.13	0.21		39.966		12.452	44.074	200.866	0.044	101.706	5.595	3.555	1.207	16.419	4.646	2.314	1.224	5.265		0.536			6.757	10.154	64.433	0.51	1.937	3.915	49.884	3.388	97.237	99.739	0.416	0.807	0.541
SON0208-062-001	GL	GALA	HERBRICH, 2016	CALC; EMP; LA-ICPMS; TIMS	2.25	-91.92	50.09	1.75	12.43	6.23	13.75	11.32	2.64	0.2	0.15	0.17		50.522		17.222	48.791	55.422	0.05	113.865	6.915	4.338	1.571	20.953	5.921	3.092	1.545	6.937		0.636			8.84	13.237	47.371	0.619	2.616	5.127	45.602	4.345	102.351	117.052	0.509	1.066	0.727
SON0208-062-002	GL	GALA	HERBRICH, 2016	EMP; LA-ICPMS	2.25	-91.92	50.08	1.73	12.18	6.26	13.71	11.21	2.66	0.21	0.16	0.21		49.365		16.652	48.381	53.323	0.051	111.926	6.49	4.1	1.506	21.136	5.592	2.8	1.439	6.718		0.579			8.557	12.618	46.707	0.588	2.503	5.267	45.224	4.167	102.167	113.105	0.463	1.006	0.676
SON0208-050-001	GL	GALA	HERBRICH, 2016	EMP; LA-ICPMS	2.16	-91.92	48.68	1.19	9.61	8.12	15.77	12.76	2.35	0.12	0.1	0.13		30.608		10.543	49.399	356.346	0.032	143.812	4.583	2.955	1.12	18.568	3.87	1.927	1.03	3.924		0.423			4.606	8.255	129.816	0.45	1.618	2.983	42.532	2.8	75.659	119.427	0.263	0.705	0.374
SON0208-050-002	GL	GALA	HERBRICH, 2016	CALC; EMP; LA-ICPMS; TIMS	2.16	-91.92	48.61	1.21	9.56	8.07	15.53	12.79	2.36	0.13	0.09	0.15		30.885		10.629	49.847	360.056	0.033	143.474	4.689	2.98	1.122	18.744	3.998	1.95	1.048	3.964		0.429			4.629	8.328	129.597	0.451	1.627	2.971	42.732	2.8	76.678	118.753	0.269	0.705	0.371
SON0208-050-003	GL	GALA	HERBRICH, 2016	EMP; LA-ICPMS	2.16	-91.92	48.82	1.2	9.6	8.11	15.67	12.76	2.33	0.13	0.09	0.13		30.574		10.145	49.415	353.24	0.029	137.111	4.746	2.981	1.094	18.422	3.968	1.916	1.049	3.978		0.426			4.556	8.19	130.564	0.412	1.582	2.985	44.408	2.804	72.507	119.59	0.258	0.722	0.38
SON0208-051-004	GL	GALA	HERBRICH, 2016	CALC; EMP; LA-ICPMS; TIMS	2.16	-91.92	49.9	2.37	14.23	5.23	13.01	9.89	2.78	0.31	0.2	0.18		73.464		24.11	48.492	41.947	0.079	96.567	9.285	5.88	1.991	22.582	8.016	4.477	2.077	10.138		0.844			13.138	18.187	35.377	0.792	3.636	7.704	45.198	5.85	120.029	113.311	0.765	1.43	1.079
SON0208-051-005	GL	GALA	HERBRICH, 2016	EMP; LA-ICPMS	2.16	-91.92	49.87	2.35	14.23	5.33	13.11	9.83	2.84	0.31	0.23	0.18		72.141		23.649	47.743	41.329	0.077	94.202	9.115	5.737	1.94	22.054	7.777	4.395	2.026	9.943		0.831			12.861	17.925	36.919	0.783	3.569	7.403	44.873	5.761	117.212	113.207	0.751	1.393	1.07
SON0208-051-006	WR	GALA	HERBRICH, 2016	EMP; LA-ICPMS; XRF	2.16	-91.92	50.63	2.43	13.99	5.35	13.19	9.93	2.65	0.46	0.26	0.24		77.51		24.133	45.61	45.07	0.205	85.032	8.678	5.179	1.886	20.803	7.243	4.091	1.843	9.688		0.779			12.378	18.078	34.372	0.751	3.612	8.715	43.858	5.614	126.486	120.781	0.713	1.295	0.938
SON0208-056-001	GL	GALA	HERBRICH, 2016	CALC; EMP; LA-ICPMS; TIMS	2.17	-91.91	49.19	1.26	10.15	7.71	15.28	12.8	2.29	0.15	0.08	0.15		37.259		11.34	47.509	350.697	0.037	132.191	4.825	3.03	1.122	18.222	4.107	1.982	1.076	4.602		0.436			5.56	8.651	99.804	0.441	1.717	3.382	45.281	2.913	75.95	118.345	0.326	0.738	0.45
[truncated: 4,971 more rows]
[truncated: 33 more columns]
