# Supplementary material for: The subduction influence on ocean ridge basalts and its significance
Source: Research Square preprint supplement (doi:10.21203/rs.3.rs-132754/v1), 2021-01-08
Supplement: Supplementary file 5 [file b1999713192545ad4ebfe13f.xlsx]

## Sheet: table 4
Table 4 Ce/Pb and Nb/U ratios for Gakkel samples averaged per dredging station
station name	Ce/Pb ave	Nb/U ave
HLY0102-008	20.709	44.7088
HLY0102-006	22.3072	37.9031
HLY0102-007	21.7537	41.4902
HLY0102-012	21.2156	41.136
HLY0102-013	21.3299	41.2349
HLY0102-014	21.167	41.8777
HLY0102-015	21.7182	41.0348
HLY0102-018	22.3997	39.4512
HLY0102-019	21.5459	40.1828
HLY0102-021	20.9521	44.5344
HLY0102-022	22.3692	41.4964
HLY0102-023	21.8713	41.2029
HLY0102-024	21.1731	41.3881
HLY0102-025	23.3366	43.6596
HLY0102-026	23.1757	40.7794
HLY0102-027	21.6503	41.5151
HLY0102-035	26.3312	51.0624
HLY0102-036	25.3213	48.8578
HLY0102-037	23.764	49.3725
HLY0102-038	23.2498	49.8
HLY0102-041	22.9826	50.8477
HLY0102-042	24.6307	50.8439
HLY0102-045	22.2719	48.4463
HLY0102-046	23.0328	46.7749
HLY0102-047	24.4991	51.1804
HLY0102-048	25.3476	50.8371
HLY0102-049	26.6686	49.887
HLY0102-050	24.5967	50.2907
HLY0102-051	23.0871	46.497
HLY0102-052	24.5589	49.3491
HLY0102-053	24.9844	51.4101
HLY0102-054	23.0674	45.3146
HLY0102-055	15.7933	24.9895
HLY0102-057	23.3746	44.7763
HLY0102-058	24.0774	48.3533
HLY0102-059	19.8699	42.587
HLY0102-060	21.4335	45.0592
HLY0102-061	22.1624	44.0858
HLY0102-062	23.2232	46.3452
HLY0102-063	22.5846	44.6271
HLY0102-064	22.8287	44.6385
HLY0102-065	21.1032	49.0005
HLY0102-066	24.3453	46.932
HLY0102-067	19.3776	37.9762
HLY0102-068	22.8565	43.0464
HLY0102-070	22.8813	43.9138
HLY0102-073	23.0934	45.3589
HLY0102-074	22.9861	42.2994
HLY0102-075	23.3256	48.7777
HLY0102-076	19.9653	44.3047
HLY0102-077	19.8791	46.9157
HLY0102-078	21.7647	44.0597
HLY0102-079	22.003	44.7059
HLY0102-080	23.4633	45.6457
HLY0102-081	22.6868	45.6808
HLY0102-082	22.8469	49.3803
HLY0102-083	23.6222	49.2177
HLY0102-084	26.243	48.9912
HLY0102-085	24.8602	47.7578
HLY0102-086	24.4155	50.4693
HLY0102-088	23.9992	49.3556
HLY0102-089	24.1123	49.8494
HLY0102-090	24.2067	48.2373
HLY0102-091	25.9949	49.3155
HLY0102-094	24.492	49.8134
HLY0102-095	24.7139	50.8832
HLY0102-096	24.1858	49.0374
HLY0102-R001	20.6083	41.8316
HLY0102-R002	22.3043	39.349
HLY0102-R003	21.8728	40.6358
HLY0102-R005	20.7723	40.0912
HLY0102-R006	22.5392	42.0802
HLY0102-R007	22.781	43.147
HLY0102-R012	26.4785	50.6365
HLY0102-R015	22.5412	43.7407
HLY0102-R016	23.2597	44.288
HLY0102-R017	20.9333	36.4432
HLY0102-R018	23.3382	46.0627
HLY0102-R019	23.2993	47.8752
HLY0102-R020	22.1985	50.5052
PS59-199	21.0853	46.4053
PS59-204	22.1296	47.5201
PS59-211	21.1479	40.659
PS59-212	22.6297	40.9228
PS59-216	21.5265	42.0989
PS59-218	20.7108	46.1582
PS59-221	22.0736	43.5286
PS59-222	23.3824	44.2697
PS59-223	23.912	43.8213
PS59-224	23.0101	49.2333
PS59-225	23.3	45.0185
PS59-226	24.9598	43.69
PS59-227	23.3647	42.5336
PS59-228	23.8521	41.9439
PS59-229	23.9494	42.6884
PS59-230	20.5185	41.4325
PS59-231	24.2221	45.2688
PS59-232	24.1275	47.0283
PS59-243	22.8882	49.3656
PS59-244	22.9309	46.4145
PS59-248	23.4351	49.1504
PS59-251	21.2822	48.4271
PS59-252	23.4164	52.2419
PS59-255	23.8413	51.7474
PS59-260	26.384	53.3783
PS59-263	28.202	53.4076
PS59-266	27.5953	52.3135
PS59-270	25.6268	49.7726
PS59-271	25.8104	50.0213
PS59-274	7.11031	8.43613
PS59-275	23.9542	44.9965
PS59-276	25.529	46.2751
PS59-289	20.694	41.7799
PS59-290	23.8384	47.5492
PS59-293	24.8973	47.9059
PS59-294	21.9243	46.3863
PS59-295	24.4256	47.8475
PS59-297	23.2203	45.1025
PS59-299	21.6671	35.4799
PS59-301	24.2149	46.2304
PS59-305	25.4996	48.0858
PS59-306	28.2165	47.9511
PS59-307	25.9594	50.3345
PS59-309	26.0572	49.7805
PS59-310	29.0773	51.6943
PS59-311	25.5201	50.2087
PS59-312	26.5664	49.751
PS59-313	24.3385	57.1908
PS59-315	23.9563	49.2142
PS59-318	25.644	49.9232
