# Supplementary material for: The subduction influence on ocean ridge basalts and its significance
Source: Research Square preprint supplement (doi:10.21203/rs.3.rs-132754/v1), 2021-01-08
Supplement: Supplementary file 6 [file d044fb8b8570f6c7f66dbb3d.xlsx]

## Sheet: table 3
Table 3 LA-ICP-MS measurement on Ba, Ce, Nb, Pb, Rb, Th and U contents for Gakkel MORB
Sample ID	Material	Location	Latitude (°N)	Longitude (°E)	Depth	Along-axis distance (km)	Ba	Ce	Nb	Pb	Rb	Th	U	Rb/Nb	Ba/Nb	Nb/U	Ce/Pb	Th/Nb	pass BABB filter#	BABB index
HLY0102-006-001	GL	WVZ	84.1292	0.516667	-3617.5	171.217	23.3487	11.3982	2.35291	0.525219	1.84861	0.187674	0.0564446	0.785671	9.92334	41.6853	21.7018	0.0797627	TRUE	9.18879
HLY0102-006-002	GL	WVZ	84.1292	0.516667	-3617.5	171.217	23.4347	11.4333	2.3748	0.520995	1.81057	0.188146	0.0660303	0.762412	9.8681	35.9653	21.9452	0.0792262	TRUE	13.9959
HLY0102-006-HE	GL	WVZ	84.1292	0.516667	-3617.5	171.217	23.592	11.5932	2.33824	0.498105	1.87457	0.185151	0.064845	0.8017	10.0896	36.0589	23.2746	0.0791842	TRUE	12.1429
HLY0102-007-001A	GL	WVZ	83.6	-3.11917	-3250	98.9709	38.1004	13.1056	3.74188	0.590369	3.20089	0.282906	0.087243	0.855425	10.1822	42.8903	22.199	0.0756054	FALSE	8.39801
HLY0102-007-001B	GL	WVZ	83.6	-3.11917	-3250	98.9709	38.3642	12.9892	3.66861	0.589549	3.34369	0.283245	0.0933868	0.911433	10.4574	39.284	22.0324	0.0772076	TRUE	13.5631
HLY0102-007-059	GL	WVZ	83.6	-3.11917	-3250	98.9709	37.7237	12.9834	3.68588	0.598823	3.2771	0.285368	0.0871037	0.889094	10.2346	42.316	21.6816	0.0774219	TRUE	10.5858
HLY0102-007-060	GL	WVZ	83.6	-3.11917	-3250	98.9709	39.5166	13.5215	3.78389	0.640579	3.25814	0.296659	0.084759	0.861055	10.4434	44.6429	21.1083	0.0784004	TRUE	9.2771
HLY0102-007-061	GL	WVZ	83.6	-3.11917	-3250	98.9709	60.135	13.7732	4.97369	0.630504	4.86119	0.418472	0.122264	0.977382	12.0906	40.68	21.8448	0.0841371	TRUE	15.818
HLY0102-007-HE	GL	WVZ	83.6	-3.11917	-3250	98.9709	58.6062	13.6552	4.71602	0.607915	4.74927	0.428534	0.118316	1.00705	12.427	39.8595	22.4623	0.0908678	TRUE	16.3195
HLY0102-007-SG	GL	WVZ	83.6	-3.11917	-3250	98.9709	59.9683	13.6695	4.88745	0.652554	4.91729	0.41304	0.119913	1.0061	12.2698	40.7583	20.9476	0.0845101	TRUE	18.2158
HLY0102-008-001	GL	WVZ	82.8992	-6.2425	-4042	9.1	46.969	11.2641	3.35411	0.558771	4.20174	0.23979	0.071507	1.25271	14.0034	46.906	20.1586	0.0714913	TRUE	19.7722
HLY0102-008-008	GL	WVZ	82.8992	-6.2425	-4042	9.1	44.2483	11.7575	3.25108	0.545869	3.85929	0.244611	0.0761921	1.18708	13.6103	42.6696	21.5391	0.07524	TRUE	19.7129
HLY0102-008-011	GL	WVZ	82.8992	-6.2425	-4042	9.1	43.9754	11.6895	3.16054	0.592786	3.72921	0.244601	0.0758172	1.17993	13.9139	41.6862	19.7196	0.0773924	TRUE	24.6529
HLY0102-008-013	GL	WVZ	82.8992	-6.2425	-4042	9.1	45.565	11.23	3.33247	0.551738	4.11894	0.239472	0.0692488	1.236	13.6731	48.1231	20.3539	0.0718603	TRUE	17.4514
HLY0102-008-016	GL	WVZ	82.8992	-6.2425	-4042	9.1	46.8413	11.2776	3.28635	0.556859	4.03739	0.232122	0.0698844	1.22853	14.2533	47.0255	20.2522	0.0706321	TRUE	19.4526
HLY0102-008-021	GL	WVZ	82.8992	-6.2425	-4042	9.1	42.7634	11.1509	3.13665	0.528306	3.6428	0.244162	0.0684611	1.16137	13.6335	45.8165	21.1069	0.0778418	TRUE	17.077
HLY0102-008-025	GL	WVZ	82.8992	-6.2425	-4042	9.1	46.0917	11.3322	3.26993	0.546693	4.03526	0.234781	0.0763192	1.23405	14.0956	42.8454	20.7286	0.0718	TRUE	22.542
HLY0102-008-HE1	GL	WVZ	82.8992	-6.2425	-4042	9.1	45.8673	11.2971	3.18021	0.514804	3.91036	0.253591	0.0709748	1.22959	14.4227	44.8076	21.9445	0.0797404	TRUE	18.5391
HLY0102-008-HE2	GL	WVZ	82.8992	-6.2425	-4042	9.1	45.699	10.9661	3.19083	0.532928	3.92006	0.247636	0.0750797	1.22854	14.322	42.4992	20.577	0.0776086	TRUE	23.4257
HLY0102-012-001	GL	WVZ	83.3425	-4.98083	-3007	61.4864	49.5986	14.9019	4.20909	0.678955	3.84278	0.350919	0.104094	0.912973	11.7837	40.4356	21.9483	0.0833717	TRUE	14.4595
HLY0102-012-007	GL	WVZ	83.3425	-4.98083	-3007	61.4864	49.3441	14.865	4.19021	0.719694	3.80007	0.363245	0.0960831	0.906893	11.776	43.6103	20.6546	0.0866888	TRUE	13.7703
HLY0102-012-013	GL	WVZ	83.3425	-4.98083	-3007	61.4864	49.5252	14.9237	4.14125	0.684141	3.78506	0.34088	0.102485	0.913989	11.959	40.4084	21.8137	0.0823133	TRUE	15.0166
HLY0102-012-017	GL	WVZ	83.3425	-4.98083	-3007	61.4864	49.2838	14.904	4.11572	0.728949	3.75321	0.348781	0.102663	0.911921	11.9745	40.0896	20.4459	0.0847437	TRUE	18.0617
HLY0102-013-005	GL	WVZ	83.34	-5.695	-3194.5	57.2268	50.5064	15.102	4.25237	0.708019	3.76446	0.359093	0.103126	0.885262	11.8772	41.2349	21.3299	0.0844454	TRUE	14.6124
HLY0102-014-001	GL	WVZ	83.425	-4.4725	-3151	73.7096	73.7301	17.3654	5.68157	0.859438	5.6291	0.482826	0.139423	0.990765	12.9771	40.7505	20.2055	0.0849812	TRUE	20.4679
HLY0102-014-002	GL	WVZ	83.425	-4.4725	-3151	73.7096	72.938	17.5656	5.81811	0.832227	5.48002	0.498217	0.140777	0.94189	12.5364	41.3284	21.1067	0.0856321	TRUE	16.7375
HLY0102-014-006	GL	WVZ	83.425	-4.4725	-3151	73.7096	72.8442	17.2055	5.68234	0.890846	5.66642	0.487036	0.135849	0.997197	12.8194	41.8285	19.3137	0.0857104	TRUE	21.0492
HLY0102-014-010	GL	WVZ	83.425	-4.4725	-3151	73.7096	72.74	17.1703	5.66641	0.828015	5.63921	0.500476	0.137101	0.995201	12.8371	41.3301	20.7368	0.0883234	TRUE	18.6962
HLY0102-014-011	GL	WVZ	83.425	-4.4725	-3151	73.7096	71.5887	17.0638	5.598	0.835443	5.69567	0.465497	0.135229	1.01745	12.7883	41.3965	20.4248	0.0831542	TRUE	19.5191
HLY0102-014-HE1	GL	WVZ	83.425	-4.4725	-3151	73.7096	75.1495	17.7705	5.80475	0.793614	5.73587	0.507731	0.132466	0.988134	12.9462	43.8208	22.3918	0.0874681	FALSE	12.9422
HLY0102-014-HE2	GL	WVZ	83.425	-4.4725	-3151	73.7096	71.0818	17.1741	5.65071	0.739781	5.44778	0.495877	0.131068	0.964087	12.5793	43.1126	23.2151	0.0877549	FALSE	11.1295
HLY0102-014-HE3	GL	WVZ	83.425	-4.4725	-3151	73.7096	74.3893	17.8028	5.86397	0.773558	5.67719	0.519047	0.141503	0.968147	12.6858	41.4407	23.0142	0.0885146	TRUE	13.4133
HLY0102-014-SG	GL	WVZ	83.425	-4.4725	-3151	73.7096	72.6059	16.8613	5.592	0.839103	5.54258	0.474323	0.13349	0.991162	12.9839	41.8907	20.0944	0.0848218	TRUE	19.5654
HLY0102-015-001	GL	WVZ	83.4542	-4.395	-3174.5	77.4136	59.8017	17.5558	4.84682	0.822917	4.67151	0.405054	0.12095	0.963832	12.3383	40.073	21.3337	0.0835711	TRUE	17.5909
HLY0102-015-002	GL	WVZ	83.4542	-4.395	-3174.5	77.4136	63.3759	16.8434	4.84632	0.808047	4.87964	0.424425	0.115865	1.00688	13.0771	41.8275	20.8445	0.0875767	TRUE	18.4945
HLY0102-015-003	GL	WVZ	83.4542	-4.395	-3174.5	77.4136	45.4095	15.0122	3.56001	0.70831	3.51561	0.312877	0.0898195	0.987529	12.7555	39.6351	21.1944	0.0878868	TRUE	19.2467
HLY0102-015-004	GL	WVZ	83.4542	-4.395	-3174.5	77.4136	45.7244	15.1289	3.64497	0.732768	3.59731	0.297709	0.0883622	0.986925	12.5445	41.2503	20.6462	0.0816768	TRUE	18.4235
HLY0102-015-HE	GL	WVZ	83.4542	-4.395	-3174.5	77.4136	57.2777	16.9242	4.59999	0.699712	4.68776	0.418496	0.11104	1.01908	12.4517	41.4265	24.1874	0.0909776	TRUE	11.5172
HLY0102-018-001	GL	WVZ	83.695	-2.85167	-3908.5	109.638	32.2336	13.3129	2.85502	0.63796	2.70234	0.242077	0.071742	0.946525	11.2902	39.7956	20.868	0.0847901	TRUE	17.0725
HLY0102-018-002	GL	WVZ	83.695	-2.85167	-3908.5	109.638	33.1811	13.7145	2.90549	0.609439	2.75857	0.248457	0.0755454	0.949433	11.4201	38.4602	22.5035	0.0855128	TRUE	15.3624
HLY0102-018-003	GL	WVZ	83.695	-2.85167	-3908.5	109.638	31.8813	13.3679	2.88261	0.634238	2.67071	0.228916	0.0732306	0.926487	11.0599	39.3635	21.0772	0.0794126	TRUE	16.4633
HLY0102-018-006	GL	WVZ	83.695	-2.85167	-3908.5	109.638	33.0011	13.8361	2.97926	0.600937	2.6618	0.256849	0.0774936	0.893446	11.077	38.4452	23.0243	0.0862124	TRUE	13.0157
HLY0102-018-013	GL	WVZ	83.695	-2.85167	-3908.5	109.638	33.2322	13.9395	2.98859	0.618697	2.78386	0.233015	0.0724127	0.931495	11.1197	41.2717	22.5305	0.077968	TRUE	11.8074
HLY0102-018-014	GL	WVZ	83.695	-2.85167	-3908.5	109.638	32.831	13.6632	2.93613	0.595586	2.60282	0.263214	0.0683405	0.88648	11.1817	42.9633	22.9408	0.0896465	FALSE	8.7067
HLY0102-018-019	GL	WVZ	83.695	-2.85167	-3908.5	109.638	32.1537	13.7501	3.00519	0.586715	2.76525	0.23525	0.0849597	0.920157	10.6994	35.3719	23.4358	0.0782814	TRUE	15.138
HLY0102-018-020	GL	WVZ	83.695	-2.85167	-3908.5	109.638	32.4332	13.5646	2.91482	0.594486	2.73745	0.234264	0.072983	0.939148	11.127	39.9383	22.8174	0.0803699	TRUE	12.692
HLY0102-019-001	GL	WVZ	83.7417	-2.52833	-3535	117.695	38.4338	14.3807	3.27401	0.6858	2.82354	0.285837	0.0854728	0.862411	11.7391	38.3047	20.9693	0.0873049	TRUE	17.7277
HLY0102-019-002	GL	WVZ	83.7417	-2.52833	-3535	117.695	38.5773	14.6331	3.42405	0.655228	2.85494	0.295285	0.0800333	0.833788	11.2666	42.7828	22.3328	0.0862383	FALSE	9.43149
HLY0102-019-003	GL	WVZ	83.7417	-2.52833	-3535	117.695	38.0873	14.3648	3.31254	0.676279	2.84539	0.298761	0.084496	0.858975	11.4979	39.2035	21.241	0.090191	TRUE	15.8962
HLY0102-019-004	GL	WVZ	83.7417	-2.52833	-3535	117.695	38.2416	14.4094	3.31853	0.665858	2.80543	0.277786	0.0820599	0.845385	11.5237	40.4403	21.6404	0.0837077	TRUE	13.6928
HLY0102-021-001	GL	WVZ	83.8575	-1.935	-3075.5	130.659	43.7239	15.0895	3.94913	0.733563	3.55535	0.302152	0.0881669	0.900287	11.0718	44.7915	20.5701	0.076511	TRUE	11.6731
HLY0102-021-002	GL	WVZ	83.8575	-1.935	-3075.5	130.659	43.8668	15.4736	4.15753	0.732287	3.69592	0.322019	0.0948793	0.888971	10.5512	43.8191	21.1305	0.0774544	TRUE	10.626
HLY0102-021-004	GL	WVZ	83.8575	-1.935	-3075.5	130.659	44.1539	15.3107	4.17587	0.723712	3.6197	0.320789	0.0928127	0.866815	10.5736	44.9924	21.1557	0.0768197	TRUE	9.10131
HLY0102-022-001	GL	WVZ	83.91	-1.31	-3206.5	140.196	32.2215	12.9534	2.91416	0.570043	2.45587	0.241207	0.0679133	0.842738	11.0569	42.9101	22.7235	0.0827705	FALSE	8.36351
HLY0102-022-002	GL	WVZ	83.91	-1.31	-3206.5	140.196	31.8117	12.7806	2.86145	0.589101	2.54898	0.235624	0.0694976	0.890801	11.1173	41.1734	21.6951	0.0823442	TRUE	12.9627
HLY0102-022-HE	GL	WVZ	83.91	-1.31	-3206.5	140.196	32.3208	13.0432	2.85423	0.574871	2.58189	0.242773	0.0706393	0.904582	11.3238	40.4058	22.6889	0.0850573	TRUE	12.2384
HLY0102-023-001	GL	WVZ	84.0067	-0.8025	-3485	151.494	48.4563	13.4204	3.50821	0.636182	3.80611	0.321201	0.0898644	1.08492	13.8122	39.0389	21.0952	0.0915571	TRUE	22.9816
HLY0102-023-017	GL	WVZ	84.0067	-0.8025	-3485	151.494	50.8737	13.8474	3.5847	0.640943	4.02543	0.333326	0.0896625	1.12295	14.1919	39.9799	21.6048	0.0929857	TRUE	22.1234
HLY0102-023-026	GL	WVZ	84.0067	-0.8025	-3485	151.494	49.446	13.7867	3.53789	0.662763	3.82779	0.333158	0.0917467	1.08194	13.9761	38.5615	20.8019	0.0941684	TRUE	24.2303
HLY0102-023-027	GL	WVZ	84.0067	-0.8025	-3485	151.494	50.3748	13.5676	3.63561	0.635084	3.89242	0.340731	0.0812924	1.07064	13.8559	44.7227	21.3634	0.0937203	TRUE	16.6083
HLY0102-023-035	GL	WVZ	84.0067	-0.8025	-3485	151.494	48.4456	14.033	3.5394	0.63516	3.69013	0.329965	0.0886435	1.04259	13.6875	39.9285	22.0937	0.0932262	TRUE	19.2855
HLY0102-023-036	GL	WVZ	84.0067	-0.8025	-3485	151.494	48.7619	13.8596	3.50207	0.566506	3.68993	0.339206	0.0835951	1.05364	13.9237	41.8933	24.4651	0.0968587	TRUE	13.0744
HLY0102-023-HE	GL	WVZ	84.0067	-0.8025	-3485	151.494	51.6153	13.8039	3.66099	0.638616	4.06472	0.359928	0.0889358	1.11028	14.0987	41.1644	21.6153	0.0983144	TRUE	20.5975
HLY0102-023-SG	GL	WVZ	84.0067	-0.8025	-3485	151.494	51.9272	13.7999	3.62453	0.629232	3.95027	0.341711	0.081755	1.08987	14.3266	44.334	21.9313	0.0942774	TRUE	16.8088
HLY0102-024-013	GL	WVZ	84.0942	-1.6275	-2990.5	152.234	50.5901	13.5621	3.60062	0.640532	3.92805	0.332482	0.0869965	1.09094	14.0504	41.3881	21.1731	0.0923402	TRUE	20.9002
HLY0102-025-003	GL	WVZ	84.3917	2.1125	-3697.5	206.035	35.4951	12.0127	3.02366	0.548239	2.98855	0.256225	0.0742864	0.988387	11.7391	40.7028	21.9113	0.08474	TRUE	15.3351
HLY0102-025-004	GL	WVZ	84.3917	2.1125	-3697.5	206.035	35.1147	11.9441	3.06048	0.484773	2.92044	0.271481	0.0660074	0.954245	11.4736	46.3657	24.6385	0.0887056	FALSE	3.33409
HLY0102-025-005	GL	WVZ	84.3917	2.1125	-3697.5	206.035	35.6762	12.202	3.00126	0.551257	3.00568	0.251907	0.0749939	1.00148	11.8871	40.02	22.1348	0.083934	TRUE	15.9745
HLY0102-025-006	GL	WVZ	84.3917	2.1125	-3697.5	206.035	35.9258	12.2735	3.04681	0.497674	2.94844	0.25699	0.0640758	0.967713	11.7913	47.5501	24.6617	0.0843471	FALSE	2.75003
HLY0102-026-001A	GL	WVZ	84.4617	2.57	-4169	214.832	21.7811	12.4964	2.0977	0.569868	1.67617	0.170347	0.0577998	0.79905	10.3833	36.2926	21.9285	0.0812065	TRUE	14.9728
HLY0102-026-001B	GL	WVZ	84.4617	2.57	-4169	214.832	5.43051	6.26712	1.07439	0.321933	0.437003	0.0690803	0.0268337	0.406746	5.05452	40.0388	19.4672	0.0642974	FALSE	2.8044
HLY0102-026-001C	GL	WVZ	84.4617	2.57	-4169	214.832	21.2517	11.9665	2.04992	0.55407	1.58392	0.163098	0.0542024	0.772674	10.3671	37.8198	21.5975	0.0795628	TRUE	13.6892
HLY0102-026-006	GL	WVZ	84.4617	2.57	-4169	214.832	21.691	12.0084	2.13371	0.495352	1.7217	0.184559	0.0513913	0.806903	10.1658	41.5189	24.2422	0.0864968	TRUE	4.93237
HLY0102-026-010	GL	WVZ	84.4617	2.57	-4169	214.832	21.5399	12.0013	2.17439	0.52485	1.70048	0.178232	0.0481398	0.782049	9.90618	45.1683	22.8662	0.0819686	FALSE	3.29858
HLY0102-026-012	GL	WVZ	84.4617	2.57	-4169	214.832	21.7043	12.1552	2.1126	0.513663	1.69026	0.180533	0.0523579	0.800085	10.2737	40.3492	23.6637	0.0854552	TRUE	7.3078
HLY0102-026-018	GL	WVZ	84.4617	2.57	-4169	214.832	21.1126	12.185	2.08257	0.507375	1.60719	0.178105	0.0443203	0.771732	10.1377	46.9892	24.0158	0.0855215	FALSE	-0.65202
HLY0102-026-019	GL	WVZ	84.4617	2.57	-4169	214.832	20.7303	11.8239	1.99721	0.515906	1.58502	0.167056	0.0506456	0.793618	10.3796	39.4349	22.9186	0.0836448	TRUE	9.76358
HLY0102-026-020	GL	WVZ	84.4617	2.57	-4169	214.832	20.693	11.7548	2.01758	0.519538	1.61334	0.173083	0.0523994	0.79964	10.2563	38.504	22.6255	0.0857872	TRUE	11.1986
HLY0102-026-021	GL	WVZ	84.4617	2.57	-4169	214.832	20.8791	11.8415	2.0614	0.506679	1.64281	0.173677	0.0522181	0.79694	10.1286	39.4767	23.3707	0.0842518	TRUE	8.51594
HLY0102-026-022	GL	WVZ	84.4617	2.57	-4169	214.832	21.0386	11.9281	2.0261	0.488577	1.68294	0.169856	0.0486234	0.83063	10.3838	41.6692	24.414	0.083834	TRUE	5.09956
HLY0102-026-HE1	GL	WVZ	84.4617	2.57	-4169	214.832	21.6665	12.3354	2.19155	0.503966	1.76215	0.192331	0.0559084	0.804065	9.88639	39.199	24.4766	0.0877602	TRUE	6.34974
HLY0102-026-HE2	GL	WVZ	84.4617	2.57	-4169	214.832	20.7855	11.8735	2.10447	0.457396	1.6545	0.172456	0.0498783	0.786181	9.87681	42.1921	25.9589	0.0819474	FALSE	0.110271
HLY0102-026-SG	GL	WVZ	84.4617	2.57	-4169	214.832	20.9517	11.749	2.02096	0.512736	1.5884	0.172036	0.0478233	0.785963	10.3672	42.2589	22.9144	0.0851259	FALSE	6.81573
HLY0102-027-001	GL	WVZ	84.4833	2.75417	-4191.5	218.166	6.64044	5.31436	0.688345	0.233455	0.579649	0.0507517	0.0195031	0.842091	9.64697	35.2942	22.7639	0.0737301	TRUE	13.9151
HLY0102-027-007	GL	WVZ	84.4833	2.75417	-4191.5	218.166	6.63962	5.3807	0.672854	0.25	0.598616	0.051497	0.0176366	0.889668	9.86785	38.151	21.5228	0.0765353	TRUE	14.5633
HLY0102-027-015	GL	WVZ	84.4833	2.75417	-4191.5	218.166	6.94347	5.37703	0.702161	0.242892	0.59834	0.0563324	0.0176222	0.85214	9.88871	39.8452	22.1375	0.0802272	TRUE	11.106
HLY0102-027-029	GL	WVZ	84.4833	2.75417	-4191.5	218.166	6.7357	5.45764	0.739127	0.275306	0.555588	0.0490579	0.0173735	0.751682	9.11305	42.5435	19.8239	0.0663728	TRUE	10.4423
HLY0102-027-032	GL	WVZ	84.4833	2.75417	-4191.5	218.166	7.0874	5.57378	0.722067	0.280126	0.604658	0.0564265	0.0158787	0.837399	9.81543	45.4741	19.8974	0.0781458	TRUE	9.63381
HLY0102-027-HE	GL	WVZ	84.4833	2.75417	-4191.5	218.166	6.70465	5.22064	0.705772	0.243045	0.601501	0.0583261	0.0147705	0.85226	9.49975	47.7826	21.4801	0.0826415	TRUE	3.94072
HLY0102-035-001	GL	SMZ	85.2617	10.7233	-3917.5	335.582	168.83	23.2579	15.1492	0.954423	14.5997	1.15232	0.294587	0.963731	11.1445	51.425	24.3685	0.0760652	FALSE	-1.50388
HLY0102-035-002	GL	SMZ	85.2617	10.7233	-3917.5	335.582	167.45	23.1031	14.8773	0.849993	14.5942	1.16216	0.312111	0.98097	11.2554	47.6667	27.1803	0.078116	FALSE	-2.95525
HLY0102-035-034	GL	SMZ	85.2617	10.7233	-3917.5	335.582	168.068	23.1727	15.2287	0.911626	14.3502	1.13887	0.305607	0.942313	11.0362	49.8309	25.4191	0.0747845	FALSE	-2.48356
HLY0102-035-038	GL	SMZ	85.2617	10.7233	-3917.5	335.582	169.392	23.3717	15.3348	0.930697	14.9328	1.14815	0.284343	0.973782	11.0462	53.9306	25.1121	0.0748719	FALSE	-5.48332
HLY0102-035-040	GL	SMZ	85.2617	10.7233	-3917.5	335.582	168.931	23.1727	15.325	0.952319	15.0365	1.15981	0.27504	0.981172	11.0232	55.7191	24.333	0.0756809	FALSE	-5.63499
HLY0102-035-HE	GL	SMZ	85.2617	10.7233	-3917.5	335.582	166.127	23.0197	14.9668	0.903337	14.9869	1.13472	0.301809	1.00135	11.0997	49.5902	25.483	0.0758161	FALSE	-1.3964
HLY0102-035-HE2	GL	SMZ	85.2617	10.7233	-3917.5	335.582	173.342	23.8251	15.5152	0.877135	15.315	1.16578	0.314873	0.987097	11.1724	49.2743	27.1625	0.0751379	FALSE	-4.5513
HLY0102-036-001	GL	SMZ	85.2633	12.4058	-4410.5	346.417	258.672	25.4422	17.6757	1.08277	23.3359	1.51282	0.382427	1.32022	14.6343	46.2198	23.4974	0.0855876	FALSE	15.6767
HLY0102-036-009	GL	SMZ	85.2633	12.4058	-4410.5	346.417	256.572	24.9071	17.6117	0.983606	23.5755	1.42556	0.344164	1.33862	14.5682	51.1726	25.3223	0.0809436	FALSE	7.25781
HLY0102-036-045	GL	SMZ	85.2633	12.4058	-4410.5	346.417	262.648	25.6683	17.9926	0.99444	24.0197	1.49834	0.334822	1.33498	14.5975	53.7379	25.8118	0.083275	FALSE	3.69976
HLY0102-036-053	GL	SMZ	85.2633	12.4058	-4410.5	346.417	254.278	24.9366	17.5142	1.03726	23.2166	1.49735	0.349931	1.32558	14.5184	50.0505	24.0409	0.0854935	FALSE	10.6773
HLY0102-036-059	GL	SMZ	85.2633	12.4058	-4410.5	346.417	251.257	24.4013	17.069	0.944217	22.5992	1.44853	0.337564	1.32399	14.72	50.5653	25.8429	0.0848633	FALSE	6.81673
HLY0102-036-062	GL	SMZ	85.2633	12.4058	-4410.5	346.417	257.262	25.2677	17.2741	1.02501	22.6932	1.461	0.379683	1.31371	14.8929	45.4963	24.6511	0.084577	FALSE	14.3573
HLY0102-036-063	GL	SMZ	85.2633	12.4058	-4410.5	346.417	254.368	24.8747	17.3947	0.98633	23.0902	1.48596	0.340585	1.32743	14.6233	51.0729	25.2194	0.0854263	FALSE	7.47247
HLY0102-036-064	GL	SMZ	85.2633	12.4058	-4410.5	346.417	256.626	24.9694	17.645	0.965058	23.9177	1.49453	0.342736	1.35549	14.5438	51.4827	25.8735	0.0846998	FALSE	6.06403
HLY0102-036-065	GL	SMZ	85.2633	12.4058	-4410.5	346.417	254.145	25.2448	17.4408	1.00278	23.3281	1.45736	0.334451	1.33756	14.5719	52.1476	25.1748	0.0835602	FALSE	6.56683
HLY0102-036-067	GL	SMZ	85.2633	12.4058	-4410.5	346.417	257.715	25.3677	17.5284	1.05014	23.0324	1.49167	0.362532	1.314	14.7027	48.3499	24.1565	0.0851001	FALSE	12.2309
HLY0102-036-071	GL	SMZ	85.2633	12.4058	-4410.5	346.417	260.638	25.4372	17.6212	1.34809	23.4789	1.49844	0.373222	1.33242	14.7912	47.2137	18.8691	0.0850365	TRUE	24.3422
HLY0102-036-072	GL	SMZ	85.2633	12.4058	-4410.5	346.417	260.99	25.7803	17.6046	1.0842	23.4997	1.48334	0.382948	1.33486	14.8251	45.9713	23.778	0.0842587	FALSE	15.8507
HLY0102-036-073	GL	SMZ	85.2633	12.4058	-4410.5	346.417	256.721	25.3817	17.5911	1.04866	23.5041	1.47974	0.369091	1.33614	14.5938	47.6607	24.2041	0.0841187	FALSE	13.0045
HLY0102-036-HE1	GL	SMZ	85.2633	12.4058	-4410.5	346.417	256.789	25.3028	17.1466	0.950956	23.0468	1.50361	0.385389	1.3441	14.9761	44.4916	26.6077	0.0876916	FALSE	12.021
HLY0102-036-SG	GL	SMZ	85.2633	12.4058	-4410.5	346.417	261.134	25.6956	17.4257	1.00238	23.2674	1.50562	0.36892	1.33523	14.9856	47.2344	25.6347	0.086402	FALSE	11.1046
HLY0102-037-005	GL	SMZ	85.2975	11.4392	-4251.5	343.176	140.162	24.0922	14.41	1.03552	13.468	1.0234	0.28927	0.934629	9.72671	49.8152	23.2657	0.0710202	FALSE	-0.109832
HLY0102-037-007	GL	SMZ	85.2975	11.4392	-4251.5	343.176	142.088	24.0748	14.5891	1.00725	13.3378	1.05352	0.290445	0.914227	9.73927	50.2304	23.9015	0.0722128	FALSE	-2.08495
HLY0102-037-008	GL	SMZ	85.2975	11.4392	-4251.5	343.176	139.612	23.9331	14.3238	1.03754	13.4775	1.03638	0.290405	0.940915	9.74687	49.3235	23.0671	0.0723538	FALSE	0.901607
HLY0102-037-011	GL	SMZ	85.2975	11.4392	-4251.5	343.176	141.986	24.277	14.6086	1.07906	13.3376	1.06645	0.296897	0.912994	9.71937	49.2042	22.4982	0.0730013	FALSE	1.70132
HLY0102-037-012	GL	SMZ	85.2975	11.4392	-4251.5	343.176	140.093	24.0057	14.4062	1.03522	13.407	1.03105	0.283281	0.930641	9.72445	50.8549	23.189	0.0715696	FALSE	-1.05916
HLY0102-037-SG	GL	SMZ	85.2975	11.4392	-4251.5	343.176	139.81	23.9408	13.9948	1.08196	13.1615	1.05451	0.298989	0.940461	9.99012	46.8071	22.1272	0.0753502	FALSE	5.63157
HLY0102-038-002	GL	SMZ	85.3133	12.6942	-4676	353.269	82.7546	15.3313	7.99298	0.683325	7.84965	0.543547	0.158384	0.982067	10.3534	50.4657	22.4363	0.068003	FALSE	2.48746
HLY0102-038-004	GL	SMZ	85.3133	12.6942	-4676	353.269	84.0302	15.2057	7.90696	0.66965	7.43837	0.582218	0.165414	0.940737	10.6274	47.8011	22.7069	0.0736335	FALSE	4.37453
HLY0102-038-012	GL	SMZ	85.3133	12.6942	-4676	353.269	84.7167	15.4848	8.0409	0.683842	7.79847	0.579537	0.151315	0.96985	10.5357	53.1403	22.6438	0.0720737	FALSE	-0.530058
HLY0102-038-025	GL	SMZ	85.3133	12.6942	-4676	353.269	93.5485	16.7746	8.85563	0.711699	8.70866	0.638314	0.176116	0.983403	10.5637	50.2831	23.5698	0.07208	FALSE	0.717581
HLY0102-038-026	GL	SMZ	85.3133	12.6942	-4676	353.269	92.5986	16.8611	8.75007	0.701168	8.47191	0.604471	0.180946	0.96821	10.5826	48.3574	24.0471	0.0690818	FALSE	1.48719
HLY0102-038-027	GL	SMZ	85.3133	12.6942	-4676	353.269	88.2965	15.933	8.19765	0.705717	8.09027	0.605969	0.161002	0.986901	10.7709	50.9165	22.577	0.0739197	FALSE	2.41222
HLY0102-038-028	GL	SMZ	85.3133	12.6942	-4676	353.269	86.9007	15.8869	8.11195	0.696267	7.82184	0.606238	0.155073	0.964237	10.7127	52.3104	22.8172	0.0747339	FALSE	0.116497
HLY0102-038-029	GL	SMZ	85.3133	12.6942	-4676	353.269	85.5818	15.8528	7.88595	0.701585	7.65725	0.555543	0.163887	0.970999	10.8524	48.1183	22.5957	0.0704472	FALSE	5.04859
HLY0102-038-HE3	GL	SMZ	85.3133	12.6942	-4676	353.269	82.6383	15.0025	7.77462	0.631343	7.61966	0.562349	0.160227	0.980068	10.6292	48.5227	23.7629	0.0723314	FALSE	2.13354
HLY0102-038-SG	GL	SMZ	85.3133	12.6942	-4676	353.269	86.1314	15.688	8.21292	0.679985	7.82211	0.599926	0.170801	0.952416	10.4873	48.0848	23.071	0.0730466	FALSE	3.34159
HLY0102-041-002	GL	SMZ	85.6875	17.895	-3981.5	414.663	66.7028	15.1763	7.19516	0.676236	5.64653	0.480722	0.147419	0.784768	9.27051	48.8075	22.4424	0.0668118	FALSE	-0.342036
HLY0102-041-017	GL	SMZ	85.6875	17.895	-3981.5	414.663	61.3345	12.2651	5.69895	0.574931	5.25011	0.38195	0.111981	0.921242	10.7624	50.8922	21.3332	0.0670212	TRUE	3.92741
HLY0102-041-HE	GL	SMZ	85.6875	17.895	-3981.5	414.663	63.4084	12.6906	6.07735	0.534426	5.39811	0.404861	0.122637	0.888235	10.4336	49.5557	23.7463	0.0666181	FALSE	-0.517769
HLY0102-041-SG	GL	SMZ	85.6875	17.895	-3981.5	414.663	65.267	12.8757	6.10766	0.577051	5.61065	0.410841	0.112822	0.918625	10.6861	54.1353	22.3129	0.0672665	FALSE	-1.42123
HLY0102-042-002	GL	SMZ	85.725	18.0533	-3601.5	417.811	117.976	17.2373	10.7494	0.783599	11.6833	0.778387	0.207746	1.08688	10.9751	51.7429	21.9976	0.0724122	TRUE	4.53026
HLY0102-042-012	GL	SMZ	85.725	18.0533	-3601.5	417.811	117.904	17.2371	10.7225	0.777616	11.6399	0.768515	0.210909	1.08556	10.996	50.8393	22.1667	0.0716733	FALSE	5.1051
HLY0102-042-017	GL	SMZ	85.725	18.0533	-3601.5	417.811	118.373	17.3783	10.5816	0.750519	11.7194	0.791201	0.211124	1.10752	11.1867	50.1205	23.1551	0.0747712	FALSE	4.44356
HLY0102-042-018	GL	SMZ	85.725	18.0533	-3601.5	417.811	115.952	17.0805	10.5281	0.640977	11.5062	0.797846	0.207765	1.0929	11.0136	50.673	26.6476	0.0757825	FALSE	-3.55571
HLY0102-045-010	GL	SMZ	86.0217	25.0783	-4622	483.742	30.9638	11.0977	4.71431	0.49309	2.62478	0.30332	0.0971726	0.556769	6.56804	48.5148	22.5065	0.0643403	FALSE	-7.38103
HLY0102-045-019	GL	SMZ	86.0217	25.0783	-4622	483.742	30.9179	11.2005	4.7329	0.511664	2.58433	0.302162	0.0974952	0.546035	6.53254	48.545	21.8904	0.0638428	FALSE	-6.3897
HLY0102-045-038	GL	SMZ	86.0217	25.0783	-4622	483.742	30.7454	10.9188	4.60036	0.487036	2.60665	0.308213	0.095287	0.566618	6.68326	48.279	22.4189	0.0669977	FALSE	-6.66099
HLY0102-046-116	GL	EVZ	86.0417	30.08	-4531	523.56	29.6342	11.368	2.80165	0.552088	2.64544	0.214584	0.0623572	0.944242	10.5774	44.929	20.591	0.076592	TRUE	11.461
HLY0102-046-127	GL	EVZ	86.0417	30.08	-4531	523.56	52.9533	14.8807	7.21848	0.584135	4.03837	0.457619	0.148465	0.559449	7.33581	48.6207	25.4747	0.0633955	FALSE	-12.3082
HLY0102-047-004	GL	EVZ	86.0425	31.1617	-4017.5	530.042	75.2221	20.099	10.6678	0.83116	6.81403	0.693083	0.20189	0.638748	7.05133	52.8395	24.1819	0.0649697	FALSE	-13.1503
HLY0102-047-005	GL	EVZ	86.0425	31.1617	-4017.5	530.042	76.1509	20.5418	10.8364	0.810854	6.87197	0.690808	0.213735	0.634159	7.02736	50.7	25.3336	0.0637492	FALSE	-13.4165
HLY0102-047-007	GL	EVZ	86.0425	31.1617	-4017.5	530.042	75.3259	20.0894	10.667	0.870714	6.86775	0.670034	0.216127	0.643831	7.06158	49.3553	23.0723	0.0628136	FALSE	-7.35624
HLY0102-047-010	GL	EVZ	86.0425	31.1617	-4017.5	530.042	76.3184	20.3574	10.6895	0.843962	6.96979	0.683195	0.206073	0.652021	7.13956	51.8724	24.1213	0.0639126	FALSE	-11.7392
HLY0102-047-011	GL	EVZ	86.0425	31.1617	-4017.5	530.042	75.7499	20.1867	10.7613	0.782847	6.6705	0.678132	0.21045	0.619863	7.03913	51.1345	25.7863	0.063016	FALSE	-14.9544
HLY0102-048-004	GL	EVZ	86.0475	31.5167	-4019	533.746	84.7097	21.6717	11.123	0.8765	7.15941	0.733076	0.216259	0.643657	7.61572	51.4338	24.7253	0.0659062	FALSE	-11.9675
HLY0102-048-005	GL	EVZ	86.0475	31.5167	-4019	533.746	84.2096	21.4563	11.0141	0.857543	7.21703	0.711508	0.203615	0.655252	7.64559	54.0929	25.0207	0.0645996	FALSE	-15.0016
HLY0102-048-HE1	GL	EVZ	86.0475	31.5167	-4019	533.746	86.5959	22.1812	11.3893	0.831369	7.37315	0.744018	0.230138	0.647377	7.60329	49.4888	26.6803	0.0653263	FALSE	-13.8941
HLY0102-048-SG	GL	EVZ	86.0475	31.5167	-4019	533.746	84.8377	21.612	11.2284	0.865719	7.35108	0.717702	0.232313	0.654689	7.55567	48.3328	24.9642	0.0639187	FALSE	-9.26304
HLY0102-049-001	GL	EVZ	86.0542	32.0108	-4126.5	536.895	118.691	34.6801	17.9051	1.32266	10.8588	1.18223	0.359187	0.606465	6.62891	49.849	26.2199	0.0660275	FALSE	-15.3114
HLY0102-049-007	GL	EVZ	86.0542	32.0108	-4126.5	536.895	119.389	35.0661	17.9713	1.36219	10.6498	1.18972	0.37034	0.592603	6.64331	48.5265	25.7424	0.0662009	FALSE	-13.2217
HLY0102-049-010	GL	EVZ	86.0542	32.0108	-4126.5	536.895	121.21	35.7196	18.0833	1.33884	11.0478	1.20549	0.364939	0.610939	6.70284	49.5517	26.6794	0.0666628	FALSE	-15.7625
HLY0102-049-HE	GL	EVZ	86.0542	32.0108	-4126.5	536.895	88.0277	24.7538	12.7996	0.88303	7.23798	0.79182	0.247954	0.565483	6.87736	51.621	28.0327	0.0618627	FALSE	-20.9759
HLY0102-050-001	GL	EVZ	86.3367	36.9442	-3775.5	587.825	59.3419	15.6051	8.19212	0.643737	4.46323	0.491343	0.166958	0.54482	7.24378	49.0669	24.2415	0.0599775	FALSE	-10.6363
HLY0102-050-002	GL	EVZ	86.3367	36.9442	-3775.5	587.825	44.5999	17.264	7.07705	0.706485	3.74934	0.42969	0.145125	0.529789	6.30204	48.7652	24.4365	0.0607161	FALSE	-12.2684
HLY0102-050-017	GL	EVZ	86.3367	36.9442	-3775.5	587.825	59.6506	15.7889	8.31046	0.663548	4.58607	0.504521	0.168879	0.551843	7.17777	49.2096	23.7946	0.0607092	FALSE	-9.87237
HLY0102-050-019	GL	EVZ	86.3367	36.9442	-3775.5	587.825	59.2382	16.4611	8.19139	0.659276	4.52381	0.499722	0.161243	0.552264	7.23176	50.8015	24.9684	0.0610058	FALSE	-13.7299
HLY0102-050-023	GL	EVZ	86.3367	36.9442	-3775.5	587.825	58.7896	16.0103	8.29031	0.666774	4.62421	0.492815	0.156973	0.557785	7.09137	52.8136	24.0116	0.0594447	FALSE	-13.9421
HLY0102-050-037	GL	EVZ	86.3367	36.9442	-3775.5	587.825	61.1621	16.1328	8.46204	0.655332	4.70637	0.491091	0.171472	0.556174	7.22783	49.3495	24.6178	0.0580346	FALSE	-11.5235
HLY0102-050-043	GL	EVZ	86.3367	36.9442	-3775.5	587.825	48.6555	18.7476	7.95377	0.771337	4.21506	0.489684	0.166499	0.529945	6.11729	47.7706	24.3053	0.0615663	FALSE	-11.2678
HLY0102-050-044	GL	EVZ	86.3367	36.9442	-3775.5	587.825	59.9389	15.8822	8.25328	0.637387	4.507	0.496331	0.165588	0.546087	7.26244	49.8424	24.9177	0.0601375	FALSE	-12.719
HLY0102-050-045	GL	EVZ	86.3367	36.9442	-3775.5	587.825	60.0284	15.9374	8.34715	0.634476	4.52045	0.50728	0.163225	0.541556	7.19149	51.139	25.1191	0.0607728	FALSE	-14.5857
HLY0102-050-HE	GL	EVZ	86.3367	36.9442	-3775.5	587.825	60.4003	16.0224	8.50979	0.626989	4.63439	0.510265	0.157156	0.544595	7.09774	54.1488	25.5546	0.0599621	FALSE	-18.5522
HLY0102-051-002	GL	EVZ	86.555	43.5492	-3589	638.57	21.843	13.3878	4.30475	0.577926	1.61084	0.233367	0.0912012	0.374201	5.07415	47.2006	23.1653	0.0542115	FALSE	-12.2143
HLY0102-051-013	GL	EVZ	86.555	43.5492	-3589	638.57	22.596	13.8113	4.3848	0.618176	1.65345	0.233064	0.0929718	0.377086	5.15326	47.1627	22.3421	0.0531528	FALSE	-10.376
HLY0102-051-014	GL	EVZ	86.555	43.5492	-3589	638.57	22.582	13.8948	4.39138	0.592254	1.67257	0.240826	0.092096	0.380877	5.14234	47.6826	23.4608	0.0548406	FALSE	-13.0918
HLY0102-051-025	GL	EVZ	86.555	43.5492	-3589	638.57	21.7402	13.4458	4.19942	0.599485	1.61133	0.234933	0.0972886	0.383704	5.17695	43.1645	22.4288	0.0559443	FALSE	-6.4189
HLY0102-051-029	GL	EVZ	86.555	43.5492	-3589	638.57	22.1405	13.5794	4.29344	0.563097	1.6589	0.231323	0.0895569	0.386379	5.15682	47.9409	24.1156	0.0538781	FALSE	-14.5568
HLY0102-051-031	GL	EVZ	86.555	43.5492	-3589	638.57	21.9016	13.5171	4.20285	0.609382	1.60333	0.230333	0.089982	0.381487	5.21113	46.7077	22.1816	0.0548041	FALSE	-9.45297
HLY0102-051-032	GL	EVZ	86.555	43.5492	-3589	638.57	22.2998	13.7443	4.29509	0.5987	1.69182	0.216799	0.0940257	0.393897	5.19193	45.68	22.9569	0.0504761	FALSE	-9.81663
HLY0102-051-033	GL	EVZ	86.555	43.5492	-3589	638.57	21.6715	13.5324	4.3492	0.597144	1.60283	0.237201	0.0909664	0.368534	4.98287	47.8111	22.6618	0.054539	FALSE	-12.0307
HLY0102-051-HE	GL	EVZ	86.555	43.5492	-3589	638.57	21.909	13.8504	4.26933	0.568503	1.63821	0.244441	0.0910448	0.383717	5.13172	46.8926	24.363	0.0572552	FALSE	-14.0784
HLY0102-051-SG	GL	EVZ	86.555	43.5492	-3589	638.57	22.3541	13.8745	4.35855	0.598158	1.6359	0.237115	0.0974465	0.375331	5.12879	44.7276	23.1954	0.0544022	FALSE	-9.7081
HLY0102-052-001	GL	EVZ	86.5183	42.1383	-3822	628.013	46.3472	15.6325	7.23126	0.618267	3.51891	0.423455	0.152317	0.486625	6.40929	47.4751	25.2845	0.058559	FALSE	-13.1717
HLY0102-052-002	GL	EVZ	86.5183	42.1383	-3822	628.013	46.7901	16.0255	7.32767	0.689281	3.61878	0.417603	0.153362	0.493851	6.3854	47.7801	23.2496	0.0569899	FALSE	-9.33198
HLY0102-052-007	GL	EVZ	86.5183	42.1383	-3822	628.013	47.1349	16.2369	7.45369	0.669007	3.60727	0.437911	0.14602	0.483958	6.3237	51.0457	24.2702	0.0587509	FALSE	-14.8735
HLY0102-052-008	GL	EVZ	86.5183	42.1383	-3822	628.013	46.2194	15.7065	7.37019	0.661283	3.62434	0.435742	0.148659	0.491757	6.27113	49.5777	23.7515	0.0591223	FALSE	-12.3248
HLY0102-052-HE	GL	EVZ	86.5183	42.1383	-3822	628.013	45.9282	15.8168	7.42826	0.602805	3.58803	0.424356	0.146034	0.483024	6.1829	50.8667	26.2387	0.0571273	FALSE	-18.8427
HLY0102-053-001	GL	EVZ	86.6808	49.2275	-4412.5	676.721	44.8271	16.2911	6.72951	0.667514	3.41729	0.423829	0.138905	0.507807	6.66128	48.4469	24.4056	0.0629808	FALSE	-11.7153
HLY0102-053-005	GL	EVZ	86.6808	49.2275	-4412.5	676.721	43.0224	15.7365	6.73131	0.631255	3.3531	0.414624	0.129627	0.498135	6.39138	51.9284	24.9288	0.0615963	FALSE	-16.7662
HLY0102-053-007	GL	EVZ	86.6808	49.2275	-4412.5	676.721	44.6699	16.296	6.80528	0.667095	3.38763	0.418279	0.131737	0.497794	6.56401	51.658	24.4283	0.0614639	FALSE	-15.258
HLY0102-053-009	GL	EVZ	86.6808	49.2275	-4412.5	676.721	44.5566	16.117	6.82185	0.630239	3.23958	0.431734	0.135455	0.474883	6.53145	50.3627	25.5728	0.0632869	FALSE	-16.641
HLY0102-053-018	GL	EVZ	86.6808	49.2275	-4412.5	676.721	44.771	16.5421	6.80084	0.653629	3.36178	0.410849	0.13024	0.494318	6.58316	52.2175	25.3081	0.0604115	FALSE	-17.6025
HLY0102-053-019	GL	EVZ	86.6808	49.2275	-4412.5	676.721	44.8007	16.5704	6.85426	0.676581	3.305	0.411906	0.132329	0.482182	6.53618	51.7973	24.4914	0.0600949	FALSE	-15.7968
HLY0102-053-020	GL	EVZ	86.6808	49.2275	-4412.5	676.721	44.1114	16.19	6.81748	0.641611	3.27874	0.431817	0.127981	0.480931	6.47033	53.2694	25.2333	0.0633397	FALSE	-18.8637
HLY0102-053-021	GL	EVZ	86.6808	49.2275	-4412.5	676.721	45.8597	16.7086	6.93243	0.66937	3.40919	0.442113	0.132225	0.491775	6.61524	52.4289	24.9617	0.0637747	FALSE	-17.1144
HLY0102-053-HE1	GL	EVZ	86.6808	49.2275	-4412.5	676.721	43.8985	16.3123	6.86463	0.637909	3.47746	0.432956	0.127982	0.506577	6.39488	53.6375	25.5715	0.0630705	FALSE	-19.629
HLY0102-053-HE2	GL	EVZ	86.6808	49.2275	-4412.5	676.721	44.772	16.4835	6.89915	0.678549	3.43934	0.427346	0.136385	0.498516	6.4895	50.586	24.2923	0.0619418	FALSE	-14.0076
HLY0102-053-SG	GL	EVZ	86.6808	49.2275	-4412.5	676.721	45.7322	16.7431	7.01596	0.653137	3.41336	0.434223	0.142664	0.486514	6.51831	49.1784	25.6348	0.0618907	FALSE	-15.4247
HLY0102-054-001	GL	EVZ	86.6442	48.765	-3790	673.387	24.4504	12.3232	4.18826	0.516962	1.99566	0.25152	0.0937794	0.476488	5.83785	44.6608	23.8377	0.0600535	FALSE	-8.41589
HLY0102-054-003	GL	EVZ	86.6442	48.765	-3790	673.387	22.5751	11.4089	3.83473	0.500683	1.78198	0.23442	0.08374	0.464695	5.88701	45.7933	22.7866	0.0611307	FALSE	-7.55419
HLY0102-054-019	GL	EVZ	86.6442	48.765	-3790	673.387	21.2026	11.1297	3.66207	0.492943	1.64648	0.230368	0.0805034	0.449604	5.78978	45.4896	22.578	0.0629064	FALSE	-7.19588
HLY0102-055-003	GL	EVZ	87.0308	59.4708	-4173.5	753.208	5.69881	6.70818	1.01177	0.417203	0.826346	0.0966325	0.0388206	0.816735	5.63253	26.0626	16.0789	0.0955086	TRUE	30.5161
HLY0102-055-009	GL	EVZ	87.0308	59.4708	-4173.5	753.208	5.66754	7.0081	1.03518	0.446141	0.788743	0.0986854	0.0417746	0.761937	5.47492	24.7802	15.7083	0.0953314	TRUE	31.4972
HLY0102-055-017	GL	EVZ	87.0308	59.4708	-4173.5	753.208	5.82222	6.71612	1.01946	0.426305	0.82156	0.100491	0.0426108	0.805881	5.71111	23.9248	15.7543	0.0985733	TRUE	33.2504
HLY0102-055-019	GL	EVZ	87.0308	59.4708	-4173.5	753.208	5.92542	6.94038	1.01261	0.464376	0.791646	0.102182	0.0452501	0.781788	5.85163	22.3781	14.9456	0.100909	TRUE	36.2499
HLY0102-055-HE	GL	EVZ	87.0308	59.4708	-4173.5	753.208	5.77827	7.02692	1.0607	0.425938	0.844014	0.11227	0.0409217	0.795712	5.44759	25.9203	16.4975	0.105844	TRUE	29.2469
HLY0102-055-SG	GL	EVZ	87.0308	59.4708	-4173.5	753.208	5.88247	6.78185	1.00964	0.429902	0.825324	0.103653	0.037574	0.817441	5.82629	26.8708	15.7753	0.102663	TRUE	30.597
HLY0102-057-002	GL	EVZ	86.5558	67.5433	-2786.5	823.399	25.0668	14.7473	4.66795	0.668596	2.1102	0.265681	0.106562	0.452062	5.36997	43.8048	22.0571	0.0569161	FALSE	-5.02009
HLY0102-057-003	GL	EVZ	86.5558	67.5433	-2786.5	823.399	25.7559	15.1967	4.84043	0.663327	2.06728	0.277147	0.103071	0.427086	5.32101	46.962	22.9098	0.0572568	FALSE	-10.3259
HLY0102-057-006	GL	EVZ	86.5558	67.5433	-2786.5	823.399	23.8286	15.6073	4.70946	0.681207	1.88872	0.271468	0.100741	0.401048	5.05973	46.7483	22.9113	0.0576431	FALSE	-10.8715
HLY0102-057-031	GL	EVZ	86.5558	67.5433	-2786.5	823.399	25.3248	15.0039	4.71246	0.643842	2.04075	0.278916	0.11213	0.433054	5.374	42.0267	23.3038	0.0591868	FALSE	-6.01487
HLY0102-057-045	GL	EVZ	86.5558	67.5433	-2786.5	823.399	25.27	14.8836	4.72961	0.659462	2.11141	0.274408	0.105301	0.446423	5.34294	44.9149	22.5693	0.0580193	FALSE	-7.27701
HLY0102-057-046	GL	EVZ	86.5558	67.5433	-2786.5	823.399	25.3959	15.0736	4.69198	0.710986	2.04691	0.276158	0.110939	0.436257	5.41261	42.2935	21.201	0.0588574	FALSE	-1.97411
HLY0102-057-054	GL	EVZ	86.5558	67.5433	-2786.5	823.399	25.3333	14.6196	4.56968	0.601247	2.10385	0.270303	0.0994402	0.460392	5.54378	45.954	24.3155	0.0591513	FALSE	-11.3178
HLY0102-057-061	GL	EVZ	86.5558	67.5433	-2786.5	823.399	25.1439	14.851	4.75683	0.668542	2.024	0.274651	0.1065	0.425493	5.28584	44.6653	22.2141	0.0577381	FALSE	-6.71084
HLY0102-057-064	GL	EVZ	86.5558	67.5433	-2786.5	823.399	25.4749	14.89	4.70675	0.61247	2.10281	0.284535	0.106234	0.446765	5.41242	44.3055	24.3113	0.0604526	FALSE	-10.0493
HLY0102-057-079	GL	EVZ	86.5558	67.5433	-2786.5	823.399	25.9974	15.1709	4.72007	0.594791	2.09872	0.27876	0.103092	0.444638	5.50785	45.7849	25.5063	0.0590584	FALSE	-13.8169
HLY0102-057-120	GL	EVZ	86.5558	67.5433	-2786.5	823.399	23.2345	15.7102	4.64068	0.676564	1.89948	0.249916	0.098766	0.40931	5.0067	46.9866	23.2206	0.0538534	FALSE	-11.6787
HLY0102-057-126	GL	EVZ	86.5558	67.5433	-2786.5	823.399	24.6664	16.249	4.89162	0.64543	1.90069	0.278148	0.100681	0.388561	5.04258	48.5856	25.1755	0.0568621	FALSE	-17.4485
HLY0102-057-HE1	GL	EVZ	86.5558	67.5433	-2786.5	823.399	44.5076	17.2781	6.85767	0.823565	3.99161	0.45218	0.180232	0.582065	6.49019	38.0492	20.9797	0.0659378	TRUE	6.40872
HLY0102-057-SG	GL	EVZ	86.5558	67.5433	-2786.5	823.399	23.8908	16.2507	4.77679	0.611643	1.91891	0.265716	0.104326	0.401716	5.00143	45.7869	26.569	0.0556265	FALSE	-17.2972
HLY0102-058-001	GL	EVZ	86.5275	70.0025	-3102.5	838.586	36.8316	14.9166	6.37944	0.543627	2.89083	0.379423	0.127614	0.453147	5.77349	49.9903	27.439	0.0594759	FALSE	-21.3883
HLY0102-058-002	GL	EVZ	86.5275	70.0025	-3102.5	838.586	36.7805	14.8904	6.36466	0.641707	2.97097	0.355664	0.12505	0.466792	5.77886	50.8968	23.2043	0.0558811	FALSE	-13.6131
HLY0102-058-007	GL	EVZ	86.5275	70.0025	-3102.5	838.586	37.5069	15.1441	6.45859	0.620525	3.07298	0.389891	0.131586	0.475797	5.80729	49.0827	24.4054	0.0603679	FALSE	-14.0264
HLY0102-058-010	GL	EVZ	86.5275	70.0025	-3102.5	838.586	39.7475	16.4634	6.97436	0.678393	3.34288	0.408482	0.135772	0.47931	5.69909	51.3683	24.2682	0.0585691	FALSE	-16.1364
HLY0102-058-017	GL	EVZ	86.5275	70.0025	-3102.5	838.586	38.9101	15.6358	6.76793	0.652063	3.16477	0.400873	0.13331	0.467613	5.74919	50.7685	23.9789	0.0592313	FALSE	-15.0633
HLY0102-058-018	GL	EVZ	86.5275	70.0025	-3102.5	838.586	40.4895	16.8098	7.10511	0.662083	3.2602	0.416426	0.146366	0.458852	5.69864	48.5436	25.3893	0.0586093	FALSE	-15.8612
HLY0102-058-023	GL	EVZ	86.5275	70.0025	-3102.5	838.586	38.6494	15.8778	6.70679	0.639119	3.10559	0.412527	0.152165	0.463051	5.76272	44.0757	24.8433	0.0615088	FALSE	-10.1487
HLY0102-058-031	GL	EVZ	86.5275	70.0025	-3102.5	838.586	19.3498	14.3122	3.72273	0.638421	1.48286	0.221816	0.0844249	0.398324	5.19773	44.0952	22.4182	0.0595841	FALSE	-7.07994
HLY0102-058-039	GL	EVZ	86.5275	70.0025	-3102.5	838.586	37.6093	15.2836	6.44763	0.652086	3.10579	0.368926	0.138168	0.481694	5.83304	46.6651	23.438	0.0572188	FALSE	-9.54934
HLY0102-058-044	GL	EVZ	86.5275	70.0025	-3102.5	838.586	19.2293	13.8797	3.72277	0.653516	1.45924	0.213633	0.0783028	0.391976	5.16532	47.5433	21.2385	0.0573855	FALSE	-8.30919
HLY0102-058-HE	GL	EVZ	86.5275	70.0025	-3102.5	838.586	36.4621	14.6502	6.27603	0.604667	2.99838	0.356594	0.128459	0.477751	5.80975	48.8564	24.2286	0.0568185	FALSE	-13.4137
HLY0102-059-011	GL	EVZ	86.4617	71.0083	-3448.5	847.66	44.3069	16.9668	6.81395	0.90658	3.85175	0.476708	0.16901	0.565275	6.50239	40.3169	18.7152	0.0699607	TRUE	8.43512
HLY0102-059-014	GL	EVZ	86.4617	71.0083	-3448.5	847.66	44.4592	17.4362	7.05517	0.897123	3.86586	0.480732	0.171417	0.547947	6.30164	41.1579	19.4357	0.0681389	TRUE	5.61215
HLY0102-059-021	GL	EVZ	86.4617	71.0083	-3448.5	847.66	44.9881	17.2158	7.12516	0.917323	4.02973	0.487543	0.166354	0.565563	6.31398	42.8314	18.7675	0.0684256	FALSE	5.55671
HLY0102-059-022	GL	EVZ	86.4617	71.0083	-3448.5	847.66	45.5008	17.5372	7.06816	0.880974	4.13953	0.499468	0.158181	0.585659	6.43743	44.6841	19.9066	0.0706645	FALSE	1.90013
HLY0102-059-025	GL	EVZ	86.4617	71.0083	-3448.5	847.66	45.6527	17.2307	7.06351	0.853527	4.04776	0.484388	0.154681	0.573051	6.46317	45.6651	20.1876	0.068576	FALSE	0.203801
HLY0102-059-038	GL	EVZ	86.4617	71.0083	-3448.5	847.66	45.0267	17.2549	7.05904	0.829084	4.15393	0.479047	0.151637	0.588456	6.37858	46.5522	20.812	0.0678629	FALSE	-1.81931
HLY0102-059-073	GL	EVZ	86.4617	71.0083	-3448.5	847.66	43.5586	17.1961	6.84743	0.864536	3.90971	0.466417	0.16911	0.570976	6.36131	40.4909	19.8906	0.0681157	TRUE	5.79838
HLY0102-059-076	GL	EVZ	86.4617	71.0083	-3448.5	847.66	46.7697	17.7325	7.12029	0.867901	4.13607	0.489289	0.160074	0.580885	6.56851	44.4811	20.4315	0.0687175	FALSE	1.16514
HLY0102-059-082	GL	EVZ	86.4617	71.0083	-3448.5	847.66	44.9526	17.3691	7.08344	0.84641	3.98798	0.475745	0.160173	0.563	6.34615	44.2235	20.5209	0.067163	FALSE	0.664327
HLY0102-059-090	GL	EVZ	86.4617	71.0083	-3448.5	847.66	45.5707	17.3191	6.97866	0.840773	4.16713	0.482357	0.153291	0.597125	6.53001	45.5256	20.5991	0.0691189	FALSE	-0.024808
HLY0102-059-099	GL	EVZ	86.4617	71.0083	-3448.5	847.66	44.4222	17.2316	7.00102	0.858321	4.06783	0.499332	0.169865	0.581034	6.3451	41.2152	20.0759	0.0713227	TRUE	4.83158
HLY0102-059-104	GL	EVZ	86.4617	71.0083	-3448.5	847.66	44.131	17.0089	6.96605	0.867838	3.99487	0.49012	0.173145	0.573477	6.33515	40.2325	19.5992	0.0703583	TRUE	6.64042
HLY0102-059-105	GL	EVZ	86.4617	71.0083	-3448.5	847.66	43.8815	17.0088	6.97843	0.891227	4.07399	0.492313	0.165261	0.583797	6.28816	42.2268	19.0847	0.0705478	FALSE	5.76423
HLY0102-059-106	GL	EVZ	86.4617	71.0083	-3448.5	847.66	43.7716	17.086	6.95916	0.869562	3.90148	0.477356	0.172582	0.560625	6.28978	40.3237	19.649	0.0685939	TRUE	6.19327
HLY0102-059-HE1	GL	EVZ	86.4617	71.0083	-3448.5	847.66	44.5485	17.4866	7.05349	0.857187	4.10822	0.498561	0.163457	0.582437	6.3158	43.1521	20.3999	0.0706828	FALSE	2.22671
HLY0102-059-HE2	GL	EVZ	86.4617	71.0083	-3448.5	847.66	43.6385	17.2148	6.92364	0.851887	3.86589	0.487386	0.17585	0.558361	6.30282	39.3724	20.2078	0.0703945	TRUE	6.01133
HLY0102-059-SG	GL	EVZ	86.4617	71.0083	-3448.5	847.66	43.5689	17.055	6.85694	0.874392	3.91953	0.49454	0.165121	0.571615	6.35398	41.5268	19.505	0.0721226	TRUE	5.53295
HLY0102-060-023	GL	EVZ	86.27	71.8325	-3515.5	866.18	21.4058	13.671	4.07907	0.673137	1.66903	0.23858	0.0902896	0.40917	5.24771	45.1776	20.3094	0.0584888	FALSE	-3.71216
HLY0102-060-025	GL	EVZ	86.27	71.8325	-3515.5	866.18	21.645	14.0034	4.19513	0.632797	1.71283	0.232031	0.092082	0.408289	5.15955	45.5586	22.1294	0.0553095	FALSE	-7.8697
HLY0102-060-026	GL	EVZ	86.27	71.8325	-3515.5	866.18	21.499	14.0233	4.15034	0.652603	1.64065	0.235649	0.0935011	0.395304	5.18005	44.3881	21.4882	0.0567783	FALSE	-5.58286
HLY0102-060-039	GL	EVZ	86.27	71.8325	-3515.5	866.18	21.7221	14.1411	4.13098	0.639438	1.6881	0.229427	0.0911938	0.408643	5.25834	45.2989	22.1148	0.055538	FALSE	-7.43728
HLY0102-060-045	GL	EVZ	86.27	71.8325	-3515.5	866.18	21.5026	13.7979	4.20279	0.653136	1.69531	0.243716	0.0936599	0.403376	5.11626	44.8729	21.1256	0.0579892	FALSE	-5.3106
HLY0102-061-003	GL	EVZ	85.635	85.05	-3869.5	991.931	13.1931	12.4909	2.81188	0.57467	0.90105	0.1515	0.0656026	0.320444	4.69192	42.8623	21.7358	0.0538786	FALSE	-6.35864
HLY0102-061-004	GL	EVZ	85.635	85.05	-3869.5	991.931	13.3624	12.5949	2.91771	0.578052	0.928169	0.162864	0.0643813	0.318115	4.57976	45.3193	21.7886	0.0558189	FALSE	-9.11307
HLY0102-061-005	GL	EVZ	85.635	85.05	-3869.5	991.931	12.813	12.4639	2.90689	0.578322	0.867196	0.146191	0.0679025	0.298325	4.40781	42.8097	21.5518	0.0502911	FALSE	-6.66758
HLY0102-061-009	GL	EVZ	85.635	85.05	-3869.5	991.931	13.5294	12.6372	2.88539	0.567989	0.886984	0.162268	0.0636099	0.307405	4.68893	45.3608	22.249	0.0562378	FALSE	-10.0831
HLY0102-061-010	GL	EVZ	85.635	85.05	-3869.5	991.931	13.2218	12.5041	2.84551	0.552719	0.94601	0.157693	0.0657629	0.332457	4.64654	43.2692	22.6229	0.0554181	FALSE	-8.42306
HLY0102-061-012	GL	EVZ	85.635	85.05	-3869.5	991.931	13.2645	12.48	2.88594	0.570087	0.86297	0.153477	0.0661175	0.299025	4.59624	43.6487	21.8914	0.053181	FALSE	-7.91135
HLY0102-061-016	GL	EVZ	85.635	85.05	-3869.5	991.931	13.2853	12.3194	2.85914	0.528784	0.929129	0.152554	0.0648226	0.324968	4.64661	44.1072	23.2976	0.0533565	FALSE	-10.7227
HLY0102-062-001	GL	EVZ	85.6183	85.0333	-4072	990.635	17.0695	11.3223	3.47329	0.494142	1.20517	0.185625	0.071629	0.346984	4.91452	48.49	22.913	0.0534436	FALSE	-13.6309
HLY0102-062-002	GL	EVZ	85.6183	85.0333	-4072	990.635	17.527	11.6606	3.58519	0.510265	1.26895	0.200795	0.0807933	0.353944	4.88871	44.3748	22.8521	0.0560069	FALSE	-9.32568
HLY0102-062-012	GL	EVZ	85.6183	85.0333	-4072	990.635	17.2018	11.4008	3.46027	0.489438	1.22467	0.182377	0.0701567	0.353923	4.97122	49.3221	23.2936	0.0527061	FALSE	-15.0407
HLY0102-062-013	GL	EVZ	85.6183	85.0333	-4072	990.635	17.3753	11.3216	3.4961	0.497825	1.24229	0.184794	0.0727422	0.355337	4.96992	48.0614	22.7421	0.0528574	FALSE	-12.6577
HLY0102-062-014	GL	EVZ	85.6183	85.0333	-4072	990.635	17.1811	11.3635	3.47507	0.526494	1.26335	0.177612	0.077651	0.363547	4.94411	44.7524	21.5833	0.0511104	FALSE	-6.94413
HLY0102-062-015	GL	EVZ	85.6183	85.0333	-4072	990.635	17.351	11.7042	3.62668	0.490938	1.28218	0.191844	0.0728212	0.353541	4.78427	49.8025	23.8405	0.0528979	FALSE	-16.8824
HLY0102-062-016	GL	EVZ	85.6183	85.0333	-4072	990.635	16.8979	11.2415	3.53299	0.465822	1.23894	0.184813	0.0776439	0.350677	4.7829	45.5025	24.1326	0.0523107	FALSE	-13.2114
HLY0102-062-017	GL	EVZ	85.6183	85.0333	-4072	990.635	17.1836	11.2405	3.44664	0.445242	1.19912	0.190553	0.0785577	0.347912	4.98562	43.8739	25.2459	0.0552866	FALSE	-13.5671
HLY0102-062-018	GL	EVZ	85.6183	85.0333	-4072	990.635	17.1465	11.3168	3.52866	0.488483	1.21285	0.19184	0.0803198	0.343716	4.8592	43.9326	23.1671	0.0543662	FALSE	-9.70826
HLY0102-062-019	GL	EVZ	85.6183	85.0333	-4072	990.635	17.3944	11.5381	3.50372	0.513681	1.2331	0.190632	0.0772768	0.351939	4.96456	45.3399	22.4615	0.0544083	FALSE	-9.43339
HLY0102-063-001	GL	EVZ	85.6342	84.5825	-3938.5	988.412	22.2522	13.2104	4.51917	0.588432	1.59929	0.251065	0.101571	0.35389	4.92395	44.4927	22.4503	0.0555554	FALSE	-8.59135
HLY0102-063-004	GL	EVZ	85.6342	84.5825	-3938.5	988.412	25.4772	15.0641	5.25966	0.695484	1.97649	0.291558	0.120195	0.375783	4.84388	43.7595	21.6599	0.0554329	FALSE	-6.06116
HLY0102-063-005	GL	EVZ	85.6342	84.5825	-3938.5	988.412	25.6967	14.9778	5.28366	0.622085	1.93649	0.30444	0.121506	0.366505	4.86343	43.4847	24.0768	0.0576191	FALSE	-10.7319
HLY0102-063-006	GL	EVZ	85.6342	84.5825	-3938.5	988.412	25.472	15.1117	5.15989	0.690564	2.01208	0.309858	0.118656	0.389946	4.93653	43.4863	21.8831	0.0600513	FALSE	-5.89222
HLY0102-063-026	GL	EVZ	85.6342	84.5825	-3938.5	988.412	25.0853	14.7549	5.18986	0.666074	1.94674	0.28492	0.111766	0.375105	4.83353	46.4348	22.152	0.0548994	FALSE	-9.74539
HLY0102-063-027	GL	EVZ	85.6342	84.5825	-3938.5	988.412	24.9277	12.87	4.31834	0.608936	1.76423	0.245783	0.095105	0.408543	5.77252	45.406	21.1353	0.056916	FALSE	-4.86683
HLY0102-063-029	GL	EVZ	85.6342	84.5825	-3938.5	988.412	28.9038	15.2682	5.37075	0.617268	2.04863	0.302997	0.118493	0.381442	5.3817	45.3254	24.7351	0.0564161	FALSE	-12.9395
HLY0102-064-004	GL	EVZ	85.6542	84.2783	-4026.5	986.005	18.0793	10.9127	3.46417	0.470478	1.39397	0.20293	0.0751939	0.402398	5.21893	46.0698	23.1948	0.0585797	FALSE	-10.517
HLY0102-064-005	GL	EVZ	85.6542	84.2783	-4026.5	986.005	17.8477	10.9834	3.3772	0.499728	1.49538	0.194753	0.0760159	0.442788	5.28476	44.4275	21.9788	0.0576671	FALSE	-5.74462
HLY0102-064-006	GL	EVZ	85.6542	84.2783	-4026.5	986.005	17.9248	10.8504	3.44009	0.489848	1.42925	0.194575	0.0762458	0.415468	5.21056	45.1185	22.1506	0.0565611	FALSE	-7.29278
HLY0102-064-014	GL	EVZ	85.6542	84.2783	-4026.5	986.005	29.9864	15.6544	5.77622	0.672777	2.52628	0.349204	0.130968	0.437358	5.19136	44.1042	23.2684	0.0604554	FALSE	-8.2127
HLY0102-064-020	GL	EVZ	85.6542	84.2783	-4026.5	986.005	17.9481	10.6973	3.35728	0.474781	1.42186	0.184869	0.0770082	0.423517	5.34603	43.5963	22.5311	0.0550652	FALSE	-6.22132
HLY0102-064-028	GL	EVZ	85.6542	84.2783	-4026.5	986.005	30.7526	16.114	5.96806	0.675175	2.46223	0.350788	0.13137	0.412569	5.15287	45.4293	23.8663	0.0587777	FALSE	-11.1595
HLY0102-064-029	GL	EVZ	85.6542	84.2783	-4026.5	986.005	31.2869	16.2911	6.13136	0.704035	2.5661	0.362136	0.138918	0.418521	5.10278	44.1365	23.1396	0.0590629	FALSE	-8.39408
HLY0102-064-030	GL	EVZ	85.6542	84.2783	-4026.5	986.005	31.3232	16.3307	6.11618	0.703071	2.57126	0.367542	0.139953	0.420403	5.12136	43.7016	23.2277	0.0600934	FALSE	-8.08103
HLY0102-064-031	GL	EVZ	85.6542	84.2783	-4026.5	986.005	30.5271	15.7534	5.8915	0.668358	2.47658	0.341078	0.129264	0.420366	5.18155	45.5772	23.5704	0.0578932	FALSE	-10.5583
HLY0102-064-032	GL	EVZ	85.6542	84.2783	-4026.5	986.005	30.3084	15.6238	5.82346	0.697755	2.43935	0.361192	0.132803	0.418883	5.20453	43.8505	22.3915	0.0620235	FALSE	-6.46401
HLY0102-064-033	GL	EVZ	85.6542	84.2783	-4026.5	986.005	17.9969	11.0234	3.51394	0.48802	1.41611	0.203442	0.0825418	0.402998	5.12158	42.5717	22.5881	0.0578955	FALSE	-5.9327
HLY0102-064-034	GL	EVZ	85.6542	84.2783	-4026.5	986.005	18.2422	10.9631	3.49474	0.493183	1.38009	0.19348	0.0757397	0.394905	5.21988	46.1415	22.2292	0.0553631	FALSE	-8.76855
HLY0102-064-035	GL	EVZ	85.6542	84.2783	-4026.5	986.005	17.8519	10.8657	3.44662	0.480009	1.42553	0.181685	0.0756239	0.413602	5.17954	45.5759	22.6365	0.0527139	FALSE	-8.79357
HLY0102-065-001	GL	EVZ	85.6567	84.7992	-3921.5	988.598	14.9638	9.12951	2.91185	0.413801	1.1013	0.15112	0.0584558	0.378213	5.13892	49.8129	22.0625	0.0518981	FALSE	-12.4703
HLY0102-065-003	GL	EVZ	85.6567	84.7992	-3921.5	988.598	15.1171	9.44741	2.85965	0.441317	1.07174	0.170263	0.0603255	0.374779	5.28636	47.4036	21.4073	0.0595398	FALSE	-8.59561
HLY0102-065-021	GL	EVZ	85.6567	84.7992	-3921.5	988.598	15.1755	9.41851	2.95877	0.45082	1.10104	0.158145	0.0627627	0.372128	5.12897	47.1422	20.892	0.0534497	FALSE	-7.56368
HLY0102-065-025	GL	EVZ	85.6567	84.7992	-3921.5	988.598	15.5345	9.58469	3.01824	0.456846	1.06352	0.159522	0.0584438	0.352363	5.14689	51.6434	20.9801	0.0528528	FALSE	-12.5125
HLY0102-066-032	GL	EVZ	85.5292	84.6758	-3041	994.339	89.1202	30.6445	16.6288	1.18023	7.42524	0.932775	0.354962	0.446527	5.35937	46.8468	25.965	0.0560938	FALSE	-15.9758
HLY0102-066-036	GL	EVZ	85.5292	84.6758	-3041	994.339	90.1252	30.7999	16.9315	1.24771	7.36275	1.00145	0.366375	0.434856	5.32294	46.2136	24.6851	0.0591474	FALSE	-13.0088
HLY0102-066-041	GL	EVZ	85.5292	84.6758	-3041	994.339	22.0872	15.0999	3.89612	0.64374	1.53475	0.21253	0.0816188	0.393918	5.66902	47.7356	23.4566	0.054549	FALSE	-12.2033
HLY0102-067-001	GL	EVZ	86.4	72.68	-3954	860.81	11.7191	10.6689	1.92898	0.507239	0.936623	0.132926	0.0487291	0.485555	6.07531	39.5857	21.0333	0.06891	TRUE	2.73651
HLY0102-067-004	GL	EVZ	86.4	72.68	-3954	860.81	25.4495	16.4722	3.95067	0.924179	2.22255	0.30845	0.112016	0.562575	6.44182	35.2688	17.8236	0.0780754	TRUE	15.1411
HLY0102-067-011	GL	EVZ	86.4	72.68	-3954	860.81	24.9308	15.9774	3.93536	0.896307	2.12526	0.31439	0.109336	0.540041	6.33508	35.9932	17.8258	0.0798886	TRUE	13.9249
HLY0102-067-013	GL	EVZ	86.4	72.68	-3954	860.81	12.4027	11.2859	2.09121	0.541418	0.955765	0.146797	0.0545257	0.457038	5.93084	38.3528	20.8451	0.0701968	FALSE	3.71581
HLY0102-067-014	GL	EVZ	86.4	72.68	-3954	860.81	12.0872	11.2128	2.03939	0.546565	0.962706	0.139116	0.0503545	0.472057	5.92688	40.5006	20.515	0.0682148	FALSE	2.44782
HLY0102-067-018	GL	EVZ	86.4	72.68	-3954	860.81	24.6759	16.2467	3.98737	0.890305	2.45344	0.290259	0.113936	0.615303	6.18853	34.9965	18.2484	0.0727946	TRUE	15.0001
HLY0102-067-021	GL	EVZ	86.4	72.68	-3954	860.81	24.7568	16.0536	3.95832	0.868006	2.3496	0.309929	0.111381	0.593584	6.25437	35.5385	18.4948	0.0782981	TRUE	13.7318
HLY0102-067-022	GL	EVZ	86.4	72.68	-3954	860.81	11.9376	11.0138	2.0217	0.53283	0.907134	0.135502	0.048995	0.448698	5.90473	41.2634	20.6704	0.0670238	FALSE	0.992848
HLY0102-067-023	GL	EVZ	86.4	72.68	-3954	860.81	11.8052	10.844	2.04172	0.547704	0.886983	0.13967	0.0506802	0.434428	5.78197	40.2864	19.799	0.068408	FALSE	3.32682
HLY0102-068-003	GL	EVZ	86.5825	71.6417	-3963.5	847.475	40.1822	17.1152	6.43765	0.823858	3.39099	0.406016	0.145346	0.526744	6.24174	44.292	20.7744	0.0630689	FALSE	-0.601241
HLY0102-068-008	GL	EVZ	86.5825	71.6417	-3963.5	847.475	40.6739	17.3236	6.50919	0.687191	3.2133	0.435439	0.151888	0.493656	6.24868	42.8553	25.2094	0.066896	FALSE	-8.52104
HLY0102-068-009	GL	EVZ	86.5825	71.6417	-3963.5	847.475	40.7345	17.521	6.70382	0.842188	3.2428	0.425382	0.153355	0.483725	6.07632	43.7145	20.8042	0.0634538	FALSE	-0.960081
HLY0102-068-010	GL	EVZ	86.5825	71.6417	-3963.5	847.475	39.3991	16.8503	6.30028	0.697924	3.09956	0.402127	0.144191	0.491972	6.25355	43.6941	24.1434	0.0638269	FALSE	-7.24635
HLY0102-068-015	GL	EVZ	86.5825	71.6417	-3963.5	847.475	39.9745	17.246	6.45571	0.806722	3.4641	0.392804	0.157869	0.536595	6.19212	40.8929	21.3778	0.060846	TRUE	1.66931
HLY0102-068-SG	GL	EVZ	86.5825	71.6417	-3963.5	847.475	39.0353	16.9008	6.29261	0.653376	3.05911	0.412944	0.146923	0.486143	6.20336	42.8294	25.8669	0.0656236	FALSE	-9.98641
HLY0102-070-009	GL	EVZ	86.75	64.7242	-4128.5	795.619	17.8452	13.7806	3.65869	0.568369	1.46298	0.210907	0.0835643	0.399863	4.87749	43.7829	24.2459	0.0576456	FALSE	-10.8484
HLY0102-070-009A	GL	EVZ	86.75	64.7242	-4128.5	795.619	18.5672	14.6868	3.92668	0.682576	1.71806	0.221	0.0891521	0.437536	4.72847	44.0447	21.5167	0.0562816	FALSE	-5.29515
HLY0102-073-001	GL	EVZ	86.96	57.3642	-4037	737.466	18.602	12.6944	3.63602	0.526897	1.3939	0.202231	0.0804783	0.383357	5.11604	45.1802	24.0928	0.0556188	FALSE	-11.8529
HLY0102-073-005	GL	EVZ	86.96	57.3642	-4037	737.466	17.8567	11.9162	3.38973	0.557039	1.45119	0.194894	0.077196	0.428113	5.26788	43.9107	21.3921	0.0574954	FALSE	-4.29817
HLY0102-073-012	GL	EVZ	86.96	57.3642	-4037	737.466	18.2883	12.1677	3.497	0.512933	1.40548	0.200499	0.0784768	0.401912	5.22971	44.5609	23.7219	0.0573345	FALSE	-10.0545
HLY0102-073-017	GL	EVZ	86.96	57.3642	-4037	737.466	28.6841	13.7947	4.96381	0.618837	2.25363	0.27167	0.107336	0.454012	5.77863	46.2458	22.2913	0.0547302	FALSE	-7.32814
HLY0102-073-018	GL	EVZ	86.96	57.3642	-4037	737.466	29.0727	13.9835	5.08465	0.559196	2.11846	0.300096	0.108421	0.416638	5.71774	46.8971	25.0064	0.0590201	FALSE	-14.0555
HLY0102-074-001	GL	EVZ	86.9792	55.32	-3885.5	725.984	15.1903	12.5678	3.14472	0.583121	1.23563	0.167114	0.109028	0.392921	4.83042	28.8431	21.5527	0.0531413	FALSE	9.30797
HLY0102-074-005	GL	EVZ	86.9792	55.32	-3885.5	725.984	14.4037	11.8109	2.88752	0.499493	1.07339	0.172547	0.0647856	0.371733	4.98825	44.5704	23.6457	0.059756	FALSE	-10.7023
HLY0102-074-009	GL	EVZ	86.9792	55.32	-3885.5	725.984	15.7415	10.7595	3.18604	0.47428	1.17141	0.170445	0.0653121	0.36767	4.94078	48.7818	22.6859	0.0534976	FALSE	-13.1214
HLY0102-074-015	GL	EVZ	86.9792	55.32	-3885.5	725.984	41.7944	15.8214	7.763	0.637812	3.60657	0.457271	0.165162	0.464584	5.38379	47.0024	24.8057	0.0589039	FALSE	-13.5077
HLY0102-075-001	GL	EVZ	86.9675	53.8975	-4172.5	718.206	39.7824	15.4645	5.7148	0.686333	3.25266	0.339693	0.118053	0.569164	6.9613	48.4089	22.5321	0.0594409	FALSE	-6.58986
HLY0102-075-003	GL	EVZ	86.9675	53.8975	-4172.5	718.206	40.6845	15.6137	5.75249	0.643468	3.13412	0.355494	0.118019	0.544829	7.07251	48.742	24.2649	0.0617983	FALSE	-10.5979
HLY0102-075-004	GL	EVZ	86.9675	53.8975	-4172.5	718.206	41.7277	16.1879	5.98196	0.648795	3.17999	0.348091	0.126839	0.531598	6.97559	47.1616	24.9507	0.0581901	FALSE	-10.7233
HLY0102-075-005	GL	EVZ	86.9675	53.8975	-4172.5	718.206	40.5598	15.6105	5.7394	0.69696	3.09996	0.373383	0.116904	0.540119	7.06691	49.0951	22.3979	0.0650561	FALSE	-7.29553
HLY0102-075-006	GL	EVZ	86.9675	53.8975	-4172.5	718.206	40.1101	15.4704	5.88302	0.672954	3.20498	0.344827	0.119169	0.544785	6.81795	49.367	22.9888	0.0586139	FALSE	-9.02768
HLY0102-075-007	GL	EVZ	86.9675	53.8975	-4172.5	718.206	41.5134	16.0669	5.92382	0.687845	3.27414	0.347979	0.119413	0.552708	7.00789	49.6077	23.3583	0.0587424	FALSE	-9.62262
HLY0102-075-008	GL	EVZ	86.9675	53.8975	-4172.5	718.206	40.5707	15.8162	5.79246	0.660674	3.35546	0.344414	0.119546	0.579281	7.00406	48.4538	23.9394	0.0594591	FALSE	-9.2378
HLY0102-075-009	GL	EVZ	86.9675	53.8975	-4172.5	718.206	40.5438	15.7871	5.80132	0.679118	3.17918	0.368938	0.11747	0.54801	6.98872	49.3856	23.2464	0.0635956	FALSE	-9.27409
HLY0102-076-003	GL	EVZ	86.9017	54.095	-4469.5	718.02	4.27958	6.35696	0.993488	0.310295	0.277084	0.0530846	0.0228534	0.2789	4.30763	43.4721	20.4868	0.0534325	FALSE	-5.63164
HLY0102-076-005	GL	EVZ	86.9017	54.095	-4469.5	718.02	4.40999	6.23674	1.00165	0.3464	0.277224	0.0556885	0.0208738	0.276768	4.40275	47.9858	18.0044	0.055597	FALSE	-5.07934
HLY0102-076-013	GL	EVZ	86.9017	54.095	-4469.5	718.02	4.56013	6.37243	1.07388	0.325657	0.298397	0.064558	0.0267231	0.277869	4.24642	40.1852	19.5679	0.0601168	FALSE	-0.60798
HLY0102-076-014	GL	EVZ	86.9017	54.095	-4469.5	718.02	4.27407	6.22337	1.00547	0.294829	0.280751	0.0566562	0.0220045	0.279223	4.2508	45.694	21.1084	0.0563477	FALSE	-9.17139
HLY0102-076-017	GL	EVZ	86.9017	54.095	-4469.5	718.02	4.42814	6.33744	0.993126	0.319738	0.281783	0.0548646	0.0195273	0.283733	4.45878	50.8584	19.8207	0.0552444	FALSE	-11.4016
HLY0102-076-019	GL	EVZ	86.9017	54.095	-4469.5	718.02	4.39216	6.34904	0.999413	0.30297	0.30085	0.0514037	0.0257635	0.301026	4.39474	38.7918	20.956	0.0514339	FALSE	-1.43575
HLY0102-076-020	GL	EVZ	86.9017	54.095	-4469.5	718.02	4.4299	6.38595	1.01256	0.313335	0.296159	0.0471456	0.0245496	0.292484	4.37493	41.2457	20.3806	0.0465606	FALSE	-2.89469
HLY0102-076-021	GL	EVZ	86.9017	54.095	-4469.5	718.02	4.40511	6.32267	0.974991	0.320597	0.288455	0.0593001	0.0209047	0.295854	4.5181	46.6397	19.7215	0.0608212	FALSE	-6.71962
HLY0102-076-022	GL	EVZ	86.9017	54.095	-4469.5	718.02	4.51162	6.44521	1.00151	0.328138	0.294411	0.0554484	0.0228294	0.293966	4.5048	43.8695	19.6417	0.0553646	FALSE	-3.8368
HLY0102-077-001	GL	EVZ	86.88	51.2117	-4845	699.13	38.118	15.9662	6.54333	0.765862	3.23015	0.382224	0.13947	0.493655	5.82548	46.9157	20.8473	0.0584144	FALSE	-4.44988
HLY0102-078-001	GL	EVZ	86.8292	51.72	-5069.5	699.871	21.4395	11.9442	3.66712	0.539017	1.70809	0.21107	0.0829041	0.465786	5.84642	44.2333	22.1592	0.0575575	FALSE	-4.77998
HLY0102-078-002	GL	EVZ	86.8292	51.72	-5069.5	699.871	21.4987	12.1098	3.63753	0.548637	1.65688	0.210107	0.086824	0.455496	5.91025	41.8955	22.0725	0.0577609	FALSE	-2.33376
HLY0102-078-004	GL	EVZ	86.8292	51.72	-5069.5	699.871	21.1163	12.0471	3.66992	0.559525	1.57729	0.20942	0.0781861	0.429789	5.75389	46.9383	21.531	0.0570639	FALSE	-6.89794
HLY0102-078-005	GL	EVZ	86.8292	51.72	-5069.5	699.871	21.2239	11.8808	3.59101	0.557889	1.69767	0.218945	0.0831797	0.472757	5.91029	43.1717	21.296	0.0609703	FALSE	-1.79797
HLY0102-079-002	GL	EVZ	86.8317	49.6558	-4663	688.203	20.35	12.796	3.65507	0.591745	1.59107	0.211653	0.0821122	0.435304	5.56762	44.513	21.6241	0.0579066	FALSE	-4.83711
HLY0102-079-028	GL	EVZ	86.8317	49.6558	-4663	688.203	32.328	13.9094	5.56491	0.588889	2.66874	0.325233	0.113151	0.479566	5.80926	49.1812	23.6198	0.0584436	FALSE	-12.4943
HLY0102-079-035	GL	EVZ	86.8317	49.6558	-4663	688.203	31.4451	13.7175	5.38172	0.594102	2.57918	0.320959	0.120217	0.479248	5.84295	44.7668	23.0895	0.0596388	FALSE	-6.97686
HLY0102-079-039	GL	EVZ	86.8317	49.6558	-4663	688.203	17.0854	7.61845	2.56728	0.381771	1.45025	0.157522	0.0579689	0.564897	6.65505	44.2872	19.9556	0.0613576	FALSE	2.19219
HLY0102-079-044	GL	EVZ	86.8317	49.6558	-4663	688.203	21.79	13.8505	3.92141	0.630783	1.59564	0.233938	0.091139	0.406905	5.55669	43.0267	21.9576	0.0596567	FALSE	-4.45901
HLY0102-079-SG1	GL	EVZ	86.8317	49.6558	-4663	688.203	15.3483	12.7145	2.90813	0.560409	1.29408	0.192317	0.06849	0.444989	5.27772	42.4606	22.6879	0.0661307	FALSE	-5.17278
HLY0102-080-004	GL	EVZ	86.6958	48.355	-4709	673.572	31.9279	17.237	5.62143	0.714748	2.69522	0.336974	0.125862	0.479456	5.67968	44.6634	24.1161	0.0599446	FALSE	-9.15234
HLY0102-080-009	GL	EVZ	86.6958	48.355	-4709	673.572	33.6453	13.9235	5.3534	0.603519	2.80992	0.340715	0.118362	0.524886	6.28484	45.2292	23.0705	0.0636446	FALSE	-6.09824
HLY0102-080-038	GL	EVZ	86.6958	48.355	-4709	673.572	27.529	15.6288	4.72946	0.645455	2.2838	0.283181	0.100532	0.482888	5.82075	47.0444	24.2137	0.0598759	FALSE	-11.4794
HLY0102-081-127	GL	EVZ	86.6475	46.6117	-4892.5	660.238	14.6858	7.31825	2.44016	0.363952	1.27131	0.15878	0.0500401	0.520997	6.01839	48.764	20.1077	0.0650696	FALSE	-4.13875
HLY0102-081-128	GL	EVZ	86.6475	46.6117	-4892.5	660.238	38.663	13.0588	6.11956	0.512381	3.33945	0.379183	0.136543	0.545701	6.31793	44.8177	25.4866	0.0619625	FALSE	-10.1603
HLY0102-081-129	GL	EVZ	86.6475	46.6117	-4892.5	660.238	39.4103	13.477	6.24013	0.549927	3.43341	0.395803	0.128201	0.550214	6.31562	48.6747	24.507	0.0634286	FALSE	-11.9935
HLY0102-081-131	GL	EVZ	86.6475	46.6117	-4892.5	660.238	4.05093	3.10355	0.783497	0.150324	0.33277	0.0492048	0.0193615	0.424724	5.17033	40.4667	20.6458	0.0628016	FALSE	0.451034
HLY0102-082-005	GL	EVZ	86.6142	44.7483	-4890	649.311	36.5642	14.2464	5.68096	0.596545	2.85518	0.343161	0.115045	0.502587	6.43627	49.3803	23.8816	0.0604054	FALSE	-11.9938
HLY0102-083-001	GL	EVZ	86.5008	42.4383	-3406	628.754	44.0714	16.3382	7.09487	0.656662	3.50458	0.416288	0.145721	0.493959	6.21173	48.6881	24.8808	0.0586745	FALSE	-13.7438
HLY0102-083-002	GL	EVZ	86.5008	42.4383	-3406	628.754	44.5068	16.287	7.21127	0.670364	3.46433	0.44066	0.150638	0.480405	6.17184	47.8715	24.2957	0.0611071	FALSE	-12.0163
HLY0102-083-010	GL	EVZ	86.5008	42.4383	-3406	628.754	44.4386	16.4898	7.16187	0.659681	3.52675	0.426093	0.141362	0.492434	6.20488	50.6633	24.9967	0.0594946	FALSE	-15.9833
HLY0102-083-011	GL	EVZ	86.5008	42.4383	-3406	628.754	44.2818	16.26	7.05315	0.687559	3.55701	0.467339	0.143595	0.504314	6.2783	49.1184	23.6489	0.0662595	FALSE	-11.4618
HLY0102-084-002	GL	EVZ	86.4367	39.87	-5169	610.049	69.0531	21.37	10.9518	0.816061	6.29333	0.756886	0.226432	0.574637	6.30516	48.367	26.1867	0.0691104	FALSE	-14.6936
HLY0102-084-006	GL	EVZ	86.4367	39.87	-5169	610.049	69.8737	21.1695	10.8364	0.761059	6.37817	0.722656	0.219996	0.588588	6.44806	49.2573	27.8158	0.0666879	FALSE	-18.4329
HLY0102-084-007	GL	EVZ	86.4367	39.87	-5169	610.049	69.1988	20.7479	10.9695	0.817108	6.28873	0.764501	0.220118	0.57329	6.30826	49.8348	25.3919	0.0696931	FALSE	-14.5877
HLY0102-084-015	GL	EVZ	86.4367	39.87	-5169	610.049	70.0535	21.0376	10.8427	0.786382	6.3955	0.716069	0.223533	0.589847	6.46092	48.5059	26.7524	0.0660418	FALSE	-15.5176
HLY0102-085-090	GL	EVZ	86.3717	40.1692	-4120.5	608.752	88.6639	24.4117	12.714	0.991407	7.79707	0.861365	0.259026	0.613267	6.97372	49.0839	24.6233	0.0677494	FALSE	-10.7682
HLY0102-085-094	GL	EVZ	86.3717	40.1692	-4120.5	608.752	88.916	24.4697	12.4998	0.95187	7.80014	0.834065	0.265226	0.624021	7.11339	47.129	25.707	0.0667263	FALSE	-10.6238
HLY0102-085-125	GL	EVZ	86.3717	40.1692	-4120.5	608.752	87.7304	24.4118	12.555	1.00666	7.79641	0.864921	0.266783	0.620981	6.98769	47.0607	24.2502	0.0688906	FALSE	-7.86359
HLY0102-086-005	GL	EVZ	86.3458	39.07	-4912.5	600.974	72.0675	17.9005	9.7416	0.716906	6.19079	0.639538	0.193554	0.6355	7.39791	50.3303	24.9691	0.0656502	FALSE	-11.7788
HLY0102-086-024	GL	EVZ	86.3458	39.07	-4912.5	600.974	72.1403	18.1264	9.85122	0.714255	6.20901	0.633538	0.189078	0.630278	7.32298	52.1012	25.3781	0.0643106	FALSE	-14.551
HLY0102-086-029	GL	EVZ	86.3458	39.07	-4912.5	600.974	71.5533	17.8608	9.69974	0.743317	6.21843	0.665993	0.198049	0.641092	7.37682	48.9765	24.0285	0.0686609	FALSE	-8.48961
HLY0102-088-002	GL	EVZ	86.3867	39.1758	-4866	603.382	49.9832	17.2444	7.35284	0.70765	4.2437	0.471922	0.147507	0.577151	6.7978	49.8473	24.3686	0.0641822	FALSE	-11.8103
HLY0102-088-004	GL	EVZ	86.3867	39.1758	-4866	603.382	50.1016	17.1303	7.30116	0.695523	4.28237	0.473574	0.150221	0.586534	6.86214	48.6028	24.6294	0.0648628	FALSE	-10.8566
HLY0102-088-006	GL	EVZ	86.3867	39.1758	-4866	603.382	67.7568	20.8028	10.6755	0.789154	6.26763	0.701225	0.218286	0.587105	6.34695	48.9059	26.3609	0.0656855	FALSE	-15.3353
HLY0102-088-007	GL	EVZ	86.3867	39.1758	-4866	603.382	47.2988	15.9789	6.80133	0.698738	3.97045	0.441576	0.135846	0.583775	6.95435	50.0663	22.8682	0.0649249	FALSE	-8.71
HLY0102-089-004	GL	EVZ	86.3075	38.4008	-4734	597.27	76.8793	20.8406	10.7887	0.855682	6.94945	0.7161	0.214775	0.644142	7.12592	50.2324	24.3556	0.066375	FALSE	-10.7052
HLY0102-089-008	GL	EVZ	86.3075	38.4008	-4734	597.27	83.975	23.9663	12.2422	0.968267	7.50137	0.802934	0.251482	0.612748	6.85948	48.6802	24.7518	0.0655875	FALSE	-10.7892
HLY0102-089-009	GL	EVZ	86.3075	38.4008	-4734	597.27	90.4634	24.0329	11.4002	0.989889	8.191	0.776798	0.226111	0.718497	7.93525	50.4186	24.2784	0.0681391	FALSE	-8.48854
HLY0102-090-004	GL	EVZ	86.2867	35.4983	-5021.5	574.12	59.6452	16.7575	7.81339	0.721415	4.82905	0.488463	0.161732	0.618047	7.63371	48.3107	23.2286	0.0625161	FALSE	-6.21003
HLY0102-090-008	GL	EVZ	86.2867	35.4983	-5021.5	574.12	58.8759	16.8354	7.86173	0.620666	4.64599	0.513359	0.152631	0.590963	7.48893	51.5081	27.1248	0.0652986	FALSE	-17.8087
HLY0102-090-015	GL	EVZ	86.2867	35.4983	-5021.5	574.12	49.0188	15.9419	7.35691	0.663824	3.87658	0.46576	0.15813	0.52693	6.66296	46.5244	24.0153	0.0633092	FALSE	-8.72281
HLY0102-090-018	GL	EVZ	86.2867	35.4983	-5021.5	574.12	90.3756	29.0441	14.485	1.11342	8.33756	0.934945	0.291736	0.5756	6.23925	49.651	26.0855	0.0645457	FALSE	-15.8531
HLY0102-090-SG1	GL	EVZ	86.2867	35.4983	-5021.5	574.12	22.4427	11.7052	3.16108	0.557639	1.72945	0.214267	0.0664971	0.547107	7.0997	47.5371	20.9907	0.0677829	FALSE	-2.77226
HLY0102-090-SG2	GL	EVZ	86.2867	35.4983	-5021.5	574.12	52.4853	17.1084	7.93038	0.717882	4.21816	0.502293	0.168715	0.531899	6.61825	47.0046	23.8318	0.0633378	FALSE	-8.8242
HLY0102-090-SG3	GL	EVZ	86.2867	35.4983	-5021.5	574.12	51.2478	16.7683	7.88457	0.627303	4.16902	0.506384	0.172787	0.528757	6.49975	45.6317	26.7308	0.0642246	FALSE	-13.4622
HLY0102-090-sg4	GL	EVZ	86.2867	35.4983	-5021.5	574.12	52.1112	17.0506	7.85937	0.720938	4.29676	0.489553	0.158038	0.546705	6.63046	49.7308	23.6505	0.0622891	FALSE	-10.9486
HLY0102-091-001	GL	EVZ	86.3292	35.6275	-4575	578.38	37.3399	16.2611	6.43642	0.650702	3.75692	0.430149	0.137717	0.583696	5.80134	46.7364	24.9901	0.0668304	FALSE	-11.2393
HLY0102-091-004	GL	EVZ	86.3292	35.6275	-4575	578.38	73.8842	19.5084	10.511	0.718107	6.18178	0.661498	0.214729	0.588127	7.02926	48.9497	27.1665	0.0629342	FALSE	-16.0198
HLY0102-091-006	GL	EVZ	86.3292	35.6275	-4575	578.38	107.587	22.6077	14.2171	0.879657	8.87395	0.916622	0.282276	0.624174	7.56745	50.366	25.7005	0.0644732	FALSE	-13.21
HLY0102-091-009	GL	EVZ	86.3292	35.6275	-4575	578.38	107.013	22.3284	14.1022	0.84284	8.64623	0.892769	0.271027	0.613111	7.58837	52.0325	26.4919	0.063307	FALSE	-16.5959
HLY0102-091-010	GL	EVZ	86.3292	35.6275	-4575	578.38	106.519	22.1837	14.025	0.785345	8.51337	0.912368	0.277241	0.607012	7.5949	50.5878	28.2471	0.0650528	FALSE	-18.744
HLY0102-091-012	GL	EVZ	86.3292	35.6275	-4575	578.38	106.395	22.3696	14.1987	0.846416	8.9457	0.933618	0.282843	0.630039	7.49328	50.1997	26.4286	0.065754	FALSE	-14.5158
HLY0102-091-014	GL	EVZ	86.3292	35.6275	-4575	578.38	107.88	22.6554	14.0925	0.862744	8.86904	0.902869	0.277339	0.629346	7.65514	50.8131	26.2597	0.0640674	FALSE	-14.5751
HLY0102-091-021	GL	EVZ	86.3292	35.6275	-4575	578.38	107.658	22.3894	13.8728	0.840702	8.8341	0.90648	0.278447	0.636792	7.76036	49.8222	26.6318	0.0653421	FALSE	-14.0695
HLY0102-091-044	GL	EVZ	86.3292	35.6275	-4575	578.38	37.754	16.4358	6.41013	0.67887	3.8803	0.415241	0.144595	0.605339	5.88975	44.3317	24.2105	0.064779	FALSE	-6.82691
HLY0102-094-003	GL	EVZ	86.0767	33.16	-4397.5	546.803	115.522	25.8853	13.9785	1.05376	9.71464	0.906033	0.275227	0.69497	8.26424	50.789	24.5646	0.0648161	FALSE	-9.32383
HLY0102-094-004	GL	EVZ	86.0767	33.16	-4397.5	546.803	120.037	27.1273	14.5489	1.06508	10.0114	0.986391	0.297901	0.688124	8.25061	48.8378	25.4697	0.0677985	FALSE	-9.30451
HLY0102-095-003	GL	EVZ	86.12	32.2	-4335	541.154	22.452	8.2348	2.91323	0.38634	1.60635	0.174178	0.0598716	0.551398	7.7069	48.658	21.3149	0.0597887	FALSE	-3.62717
HLY0102-095-015	GL	EVZ	86.12	32.2	-4335	541.154	88.1019	18.4562	10.7354	0.691724	7.33859	0.711814	0.217467	0.683589	8.20668	49.3656	26.6814	0.0663054	FALSE	-12.3852
HLY0102-095-019	GL	EVZ	86.12	32.2	-4335	541.154	88.9875	18.4899	10.6195	0.715392	7.25985	0.722629	0.204152	0.683631	8.3796	52.0178	25.8458	0.0680471	FALSE	-13.1236
HLY0102-095-037	GL	EVZ	86.12	32.2	-4335	541.154	67.4846	13.861	7.62071	0.589652	4.9791	0.494746	0.143229	0.653365	8.85542	53.2064	23.5072	0.0649212	FALSE	-9.42261
HLY0102-095-038	GL	EVZ	86.12	32.2	-4335	541.154	114.59	30.1093	16.3833	1.15942	9.90554	1.01978	0.324398	0.604614	6.99433	50.5036	25.9693	0.0622453	FALSE	-14.981
HLY0102-095-040	GL	EVZ	86.12	32.2	-4335	541.154	73.6881	15.4695	9.50048	0.619648	6.18418	0.62427	0.184304	0.650933	7.75625	51.5479	24.9649	0.0657093	FALSE	-12.255
HLY0102-096-002	GL	EVZ	86.1383	31.7825	-3955.5	537.821	84.6546	23.1683	11.9043	0.945977	6.92828	0.763759	0.234247	0.581998	7.11126	50.8195	24.4914	0.0641583	FALSE	-12.5166
HLY0102-096-009	GL	EVZ	86.1383	31.7825	-3955.5	537.821	91.3841	26.8794	13.7542	1.03443	8.3831	0.896057	0.271272	0.609494	6.64409	50.7026	25.9848	0.0651479	FALSE	-15.6281
HLY0102-096-018	GL	EVZ	86.1383	31.7825	-3955.5	537.821	83.4089	23.8023	12.2818	0.880878	7.46972	0.81559	0.251352	0.608194	6.79126	48.8628	27.0211	0.0664064	FALSE	-15.6743
HLY0102-096-022	GL	EVZ	86.1383	31.7825	-3955.5	537.821	76.6431	20.4378	10.2424	0.859225	6.66078	0.657582	0.208209	0.650313	7.4829	49.193	23.7863	0.0642018	FALSE	-7.9348
HLY0102-096-024	GL	EVZ	86.1383	31.7825	-3955.5	537.821	76.556	20.8401	10.1203	0.897821	6.71519	0.64823	0.213548	0.663539	7.56463	47.3911	23.2119	0.0640526	FALSE	-4.67124
HLY0102-R001	GL	SMZ	85.5633	15.9783	-4794	410.403	11.6389	9.68838	2.11167	0.470121	0.999892	0.157011	0.0504803	0.473508	5.5117	41.8316	20.6083	0.0743542	FALSE	0.370853
HLY0102-R002	GL	WVZ	84.1167	0.568333	-3480	170.754	23.5032	11.2618	2.18474	0.482974	1.89379	0.180387	0.0555222	0.866825	10.7579	39.349	23.3175	0.0825664	TRUE	10.6793
HLY0102-R003	GL	WVZ	84.1583	0.641667	-3728	175.107	24.1742	11.6075	2.41821	0.508017	2.00837	0.190719	0.0595095	0.830516	9.99671	40.6358	22.8487	0.0788677	TRUE	8.72007
HLY0102-R005	GL	WVZ	83.5033	-4.05	-3776	83.803	74.8317	14.8668	5.0111	0.682574	5.70193	0.462512	0.124993	1.13786	14.9332	40.0912	21.7805	0.0922975	TRUE	22.9221
HLY0102-R006	GL	WVZ	83.765	-2.34	-3098	119.454	32.726	11.9015	3.26383	0.504632	2.92366	0.247503	0.0775621	0.895774	10.0269	42.0802	23.5846	0.0758321	FALSE	6.82483
HLY0102-R007	GL	WVZ	83.875	-1.765	-2864	133.066	31.504	11.2688	2.63941	0.472009	2.5322	0.203418	0.0611725	0.95938	11.936	43.147	23.8741	0.0770697	FALSE	8.8058
HLY0102-R012	GL	EVZ	86.0633	32.6117	-4092	542.08	101.125	25.1758	13.1336	0.907236	8.31285	0.842938	0.259369	0.632948	7.6997	50.6365	27.75	0.064182	FALSE	-17.2627
HLY0102-R015	GL	EVZ	85.6417	84.8633	-3940	990.635	17.1968	11.3308	3.47986	0.480043	1.2387	0.19656	0.0795565	0.355962	4.94182	43.7407	23.6038	0.056485	FALSE	-10.0903
HLY0102-R016	GL	EVZ	85.6367	84.7517	-3781	990.079	15.6251	10.801	3.12714	0.443752	1.11994	0.173127	0.0706092	0.358135	4.9966	44.288	24.3401	0.0553628	FALSE	-12.0009
HLY0102-R017	GL	EVZ	86.6617	67.475	-4126	815.991	18.0712	13.0457	3.36252	0.59501	1.5758	0.27432	0.0922674	0.468638	5.37429	36.4432	21.9252	0.0815815	FALSE	2.85998
HLY0102-R018	GL	EVZ	86.535	43.255	-2853	636.532	23.1304	12.8053	4.14254	0.52335	1.7032	0.236312	0.0899328	0.411148	5.58363	46.0627	24.468	0.0570453	FALSE	-12.4144
HLY0102-R019	GL	EVZ	86.5467	43.195	-3320	636.532	23.279	13.2534	4.27917	0.543864	1.74447	0.241002	0.0893818	0.407665	5.44007	47.8752	24.3689	0.0563198	FALSE	-14.282
HLY0102-R020	GL	EVZ	86.2767	35.045	-5134	571.898	41.2485	13.4915	4.8057	0.580822	3.21174	0.317189	0.0951527	0.668319	8.58323	50.5052	23.2282	0.0660026	FALSE	-6.32037
PS59-199-001	GL	SMZ	85.5625	16.2308	-4714	395.772	8.36881	6.30201	1.28686	0.319757	0.684875	0.082911	0.0293507	0.532206	6.50328	43.8443	19.7088	0.0644289	FALSE	2.42588
PS59-199-002	GL	SMZ	85.5625	16.2308	-4714	395.772	11.1377	6.82386	1.66844	0.330184	1.02767	0.125544	0.0381659	0.61595	6.67552	43.7154	20.6668	0.0752468	TRUE	2.13595
PS59-199-003	GL	SMZ	85.5625	16.2308	-4714	395.772	7.76964	6.19016	1.20634	0.282651	0.655326	0.0771302	0.0273356	0.543235	6.44067	44.1306	21.9004	0.0639374	FALSE	-2.16599
PS59-199-004	GL	SMZ	85.5625	16.2308	-4714	395.772	8.31092	6.53381	1.26816	0.308122	0.724888	0.0827329	0.0284269	0.571607	6.55354	44.6112	21.2053	0.0652386	FALSE	-0.672739
PS59-199-007-004	GL	SMZ	85.5625	16.2308	-4714	395.772	31.2673	9.17936	3.5308	0.415397	2.84978	0.243154	0.0717751	0.807121	8.85558	49.1926	22.0978	0.0688666	FALSE	-0.28354
PS59-199-007-005	GL	SMZ	85.5625	16.2308	-4714	395.772	11.2197	7.03679	1.61317	0.312727	1.04032	0.112193	0.031186	0.644893	6.95505	51.7274	22.5014	0.0695482	FALSE	-8.71966
PS59-199-008	GL	SMZ	85.5625	16.2308	-4714	395.772	71.1313	10.7481	5.14704	0.504066	7.32782	0.376391	0.108096	1.4237	13.8198	47.6155	21.3228	0.0731277	TRUE	19.0421
PS59-204-031	GL	SMZ	85.0133	9.71	-3956	310.21	122.796	16.548	8.54975	0.716888	10.4438	0.713358	0.179919	1.22153	14.3625	47.5201	23.0831	0.0834362	FALSE	13.3441
PS59-211-001	GL	WVZ	84.1317	0.373333	-3887	171.125	26.003	10.7172	2.18254	0.485936	2.16532	0.177041	0.053679	0.992109	11.9141	40.659	22.0547	0.0811169	TRUE	15.3928
PS59-212-001	GL	WVZ	84.1317	0.456667	-3839	171.68	24.1745	11.6277	2.42397	0.530764	1.96631	0.194513	0.0638656	0.811192	9.97307	37.9543	21.9076	0.0802453	TRUE	12.9607
PS59-212-002	GL	WVZ	84.1317	0.456667	-3839	171.68	24.0639	11.6803	2.40335	0.535276	1.95274	0.190603	0.0603744	0.812509	10.0127	39.8074	21.8211	0.0793071	TRUE	11.3558
PS59-212-004	GL	WVZ	84.1317	0.456667	-3839	171.68	24.2292	11.5863	2.40753	0.50999	1.90578	0.207446	0.0623955	0.791594	10.0639	38.585	22.7186	0.0861657	TRUE	10.5412
PS59-212-006	GL	WVZ	84.1317	0.456667	-3839	171.68	260.873	25.3136	17.6444	1.02231	23.927	1.50295	0.380352	1.35607	14.785	46.3896	24.7612	0.0851802	FALSE	13.728
PS59-212-010	GL	WVZ	84.1317	0.456667	-3839	171.68	23.8836	11.604	2.30844	0.522937	1.90503	0.188284	0.0562676	0.825246	10.3462	41.026	22.1901	0.0815633	TRUE	10.0572
PS59-212-014	GL	WVZ	84.1317	0.456667	-3839	171.68	24.1476	11.5528	2.44664	0.495581	1.92813	0.198119	0.058568	0.788075	9.8697	41.7743	23.3115	0.0809762	TRUE	5.84135
PS59-216-001	GL	WVZ	83.085	-6.07167	-3605	30.6506	31.0473	11.6759	2.88837	0.553171	2.558	0.223578	0.0714124	0.88562	10.7491	40.4463	21.1073	0.0774065	TRUE	14.2723
PS59-216-002A	GL	WVZ	83.085	-6.07167	-3605	30.6506	32.5503	12.241	3.02103	0.595621	2.71156	0.236132	0.0719637	0.897561	10.7746	41.98	20.5517	0.0781627	TRUE	14.0644
PS59-216-002B	GL	WVZ	83.085	-6.07167	-3605	30.6506	30.8213	11.6021	2.95357	0.538907	2.50876	0.230268	0.0682359	0.849398	10.4353	43.2847	21.5288	0.0779627	TRUE	9.60792
PS59-216-008	GL	WVZ	83.085	-6.07167	-3605	30.6506	31.0384	11.4101	2.84858	0.533629	2.60738	0.233074	0.0686687	0.915323	10.8961	41.483	21.3821	0.081821	TRUE	13.3372
PS59-216-010	GL	WVZ	83.085	-6.07167	-3605	30.6506	30.7192	11.3326	2.78526	0.517651	2.59967	0.226154	0.064324	0.933368	11.0292	43.3004	21.8924	0.0811967	TRUE	10.9562
PS59-218-001	GL	WVZ	83.0867	-5.78167	-3866	32.2248	53.3444	14.0125	4.53366	0.63209	4.66479	0.332246	0.0972459	1.02892	11.7663	46.6206	22.1685	0.0732843	FALSE	9.54916
PS59-218-003	GL	WVZ	83.0867	-5.78167	-3866	32.2248	52.8666	13.8214	4.2888	0.710391	4.73559	0.323281	0.0876843	1.10418	12.3267	48.9118	19.456	0.0753779	TRUE	14.5961
PS59-218-004	GL	WVZ	83.0867	-5.78167	-3866	32.2248	53.9797	13.7778	4.16102	0.630637	4.59436	0.336471	0.0925062	1.10414	12.9727	44.981	21.8474	0.0808625	TRUE	14.6482
PS59-218-033	GL	WVZ	83.0867	-5.78167	-3866	32.2248	52.9478	13.7298	4.21596	0.67653	4.77356	0.32213	0.0879426	1.13226	12.5589	47.9399	20.2944	0.0764073	TRUE	14.6376
PS59-218-039	GL	WVZ	83.0867	-5.78167	-3866	32.2248	53.2726	13.8742	4.26437	0.686998	4.83069	0.332946	0.100127	1.1328	12.4925	42.5897	20.1954	0.0780764	TRUE	20.1012
PS59-218-046	GL	WVZ	83.0867	-5.78167	-3866	32.2248	52.894	13.8133	4.2889	0.656653	4.74439	0.33505	0.0934874	1.1062	12.3328	45.8768	21.036	0.0781202	TRUE	14.5102
PS59-218-050	GL	WVZ	83.0867	-5.78167	-3866	32.2248	53.2113	14.0546	4.29574	0.876772	4.65925	0.325459	0.0934451	1.08462	12.387	45.9707	16.03	0.0757632	TRUE	24.1805
PS59-218-052	GL	WVZ	83.0867	-5.78167	-3866	32.2248	52.8873	13.8069	4.33431	0.671026	4.67783	0.332179	0.089316	1.07926	12.202	48.5278	20.5758	0.0766395	TRUE	12.1923
PS59-218-068	GL	WVZ	83.0867	-5.78167	-3866	32.2248	52.8233	13.9719	4.27661	0.684684	4.69274	0.321319	0.0894204	1.0973	12.3517	47.8258	20.4063	0.0751342	TRUE	13.7134
PS59-221-001	GL	WVZ	83.2667	-5.57	-4166.5	50.93	52.8456	13.733	4.17324	0.65133	4.69821	0.328716	0.091586	1.12579	12.6629	45.5664	21.0845	0.0787675	TRUE	15.4796
PS59-221-H	GL	WVZ	83.2667	-5.57	-4166.5	50.93	42.8496	14.3306	3.75574	0.62693	3.44108	0.305394	0.0905195	0.916219	11.4091	41.4909	22.8583	0.0813141	TRUE	11.1085
PS59-222-001	GL	WVZ	83.275	-5.7875	-3838	51.4856	77.0398	16.5101	5.74639	0.77056	6.33948	0.47124	0.125189	1.10321	13.4066	45.9016	21.4261	0.0820063	TRUE	15.1637
PS59-222-002	GL	WVZ	83.275	-5.7875	-3838	51.4856	79.6236	19.1989	6.1262	0.868922	6.82203	0.55336	0.143688	1.11358	12.9972	42.6354	22.0951	0.0903269	FALSE	16.6742
PS59-222-004	GL	WVZ	83.275	-5.7875	-3838	51.4856	48.1007	13.4713	3.73965	0.602735	4.08844	0.30438	0.0844699	1.09327	12.8623	44.272	22.3504	0.0813927	FALSE	14.0335
PS59-223-003	GL	WVZ	83.2933	-4.34333	-2841.5	60.653	62.951	12.6912	4.31492	0.658705	4.50543	0.425274	0.103652	1.04415	14.5892	41.629	19.267	0.0985591	TRUE	24.5242
PS59-223-010	GL	WVZ	83.2933	-4.34333	-2841.5	60.653	50.1591	12.2974	4.09362	0.466203	3.7343	0.351995	0.084366	0.912224	12.253	48.5221	26.3778	0.0859862	FALSE	-1.84008
PS59-223-027	GL	WVZ	83.2933	-4.34333	-2841.5	60.653	61.5209	12.943	4.34908	0.612923	4.59809	0.425576	0.103635	1.05726	14.1457	41.9654	21.1169	0.0978542	TRUE	20.0637
PS59-223-029	GL	WVZ	83.2933	-4.34333	-2841.5	60.653	50.9658	13.4903	4.06977	0.580225	4.07216	0.346801	0.0952707	1.00059	12.523	42.718	23.2501	0.0852138	FALSE	11.9229
PS59-224-007	GL	WVZ	83.3683	-3.63167	-3131	76.858	70.4974	18.6531	5.86	0.848221	6.04042	0.445636	0.119025	1.03079	12.0303	49.2333	21.9908	0.076047	TRUE	7.68926
PS59-225-017	GL	WVZ	83.5575	-2.65167	-2903	99.082	27.4117	12.5039	2.80464	0.587772	2.45007	0.213262	0.0633488	0.873576	9.77368	44.273	21.2734	0.0760391	TRUE	8.56697
PS59-225-018	GL	WVZ	83.5575	-2.65167	-2903	99.082	27.0773	12.3958	2.74879	0.62348	2.4765	0.213508	0.0600647	0.900939	9.85061	45.7639	19.8817	0.0776731	TRUE	10.3777
PS59-226-002	GL	WVZ	83.6933	-2.22	-4046	114.268	30.8783	15.8737	3.52837	0.625013	2.58295	0.26287	0.0782084	0.732051	8.75145	45.115	25.3974	0.0745018	FALSE	-4.07702
PS59-226-012	GL	WVZ	83.6933	-2.22	-4046	114.268	29.9973	15.5985	3.36748	0.737578	2.5634	0.252829	0.0779747	0.761222	8.90793	43.1868	21.1483	0.0750795	TRUE	7.00599
PS59-226-016	GL	WVZ	83.6933	-2.22	-4046	114.268	32.8622	15.4738	3.50974	0.717241	2.84053	0.263956	0.0789348	0.809327	9.36313	44.4638	21.5741	0.0752066	TRUE	6.23622
PS59-226-018	GL	WVZ	83.6933	-2.22	-4046	114.268	30.4067	15.7925	3.484	0.608784	2.51495	0.248995	0.0821122	0.721856	8.72752	42.4297	25.941	0.071468	FALSE	-2.6654
PS59-226-021	GL	WVZ	83.6933	-2.22	-4046	114.268	32.1613	12.5216	2.93152	0.524483	2.7293	0.238227	0.0685285	0.931019	10.9709	42.7781	23.8741	0.081264	FALSE	7.3981
PS59-226-023	GL	WVZ	83.6933	-2.22	-4046	114.268	44.8398	17.3134	4.40636	0.79014	3.8999	0.352119	0.106487	0.885061	10.1762	41.3794	21.9119	0.0799114	TRUE	10.9194
PS59-226-024	GL	WVZ	83.6933	-2.22	-4046	114.268	31.0555	12.2428	2.87714	0.551188	2.6024	0.228361	0.0599431	0.904511	10.7939	47.9977	22.2117	0.0793711	FALSE	4.858
PS59-226-026	GL	WVZ	83.6933	-2.22	-4046	114.268	31.2323	12.533	2.78513	0.6261	2.64427	0.237292	0.0660467	0.949425	11.2139	42.1691	20.0176	0.0851996	TRUE	16.3366
PS59-226-031	GL	WVZ	83.6933	-2.22	-4046	114.268	65.6566	17.4864	8.75761	0.661333	5.84795	0.578793	0.161917	0.667756	7.49709	54.0871	26.4412	0.0660903	FALSE	-17.8572
PS59-227-001	GL	WVZ	83.8033	-2.08667	-2967	124.732	42.8455	13.1124	3.3613	0.607728	3.34614	0.310029	0.0812268	0.995491	12.7467	41.3816	21.5761	0.0922348	TRUE	16.844
PS59-227-002	GL	WVZ	83.785	-2.14333	-2965	122.602	43.3261	13.5119	3.77073	0.590515	3.6463	0.32517	0.0863152	0.967001	11.4901	43.6856	22.8816	0.0862354	FALSE	9.74244
PS59-228-003	GL	WVZ	83.885	-1.06667	-3320	138.9	29.2829	12.253	2.62927	0.518249	2.28322	0.212117	0.0661783	0.868385	11.1373	39.7301	23.6432	0.0806754	TRUE	10.2016
PS59-228-006	GL	WVZ	83.885	-1.06667	-3320	138.9	28.6885	11.9832	2.65036	0.603945	2.31885	0.210901	0.0565098	0.874919	10.8244	46.9009	19.8415	0.0795743	TRUE	10.294
PS59-228-011	GL	WVZ	83.885	-1.06667	-3320	138.9	29.3473	12.4308	2.60786	0.570809	2.28134	0.207187	0.0640402	0.874794	11.2534	40.7222	21.7775	0.0794472	TRUE	13.1994
PS59-228-021	GL	WVZ	83.885	-1.06667	-3320	138.9	29.1457	12.2451	2.56366	0.519771	2.18866	0.215731	0.063422	0.853725	11.3688	40.4222	23.5586	0.0841495	TRUE	9.78269
PS59-229-002	GL	WVZ	83.9542	-0.3525	-3427	150.382	43.0472	14.3532	3.86106	0.618054	3.51979	0.324188	0.0955254	0.911612	11.1491	40.4192	23.2232	0.0839635	TRUE	11.0173
PS59-229-004	GL	WVZ	83.9542	-0.3525	-3427	150.382	41.9622	14.0176	3.70371	0.618158	3.48319	0.311236	0.0854234	0.94046	11.3298	43.3571	22.6764	0.0840335	FALSE	9.8587
PS59-229-013	GL	WVZ	83.9542	-0.3525	-3427	150.382	42.6508	14.2463	3.73453	0.601597	3.47275	0.306911	0.085516	0.929903	11.4207	43.6705	23.6809	0.0821821	FALSE	7.50524
PS59-229-SG	GL	WVZ	83.9542	-0.3525	-3427	150.382	35.2986	13.7854	3.1439	0.786592	2.89092	0.258607	0.0725958	0.919531	11.2276	43.3069	17.5254	0.0822565	TRUE	19.7538
PS59-230-002	GL	WVZ	83.96	-0.373333	-3596	150.568	53.6993	15.0375	4.21084	0.732877	4.33981	0.374668	0.101631	1.03063	12.7526	41.4325	20.5185	0.088977	TRUE	19.4435
PS59-231-001	GL	WVZ	83.95	-0.3525	-3176.5	150.012	77.5843	19.8612	11.1633	0.797846	6.80551	0.698968	0.197974	0.60963	6.94991	56.3878	24.8935	0.0626128	FALSE	-18.7005
PS59-231-012	GL	WVZ	83.95	-0.3525	-3176.5	150.012	26.0498	14.4875	2.74669	0.606445	2.11368	0.235379	0.0703223	0.769537	9.48407	39.0586	23.8891	0.0856957	TRUE	6.58391
PS59-231-018	GL	WVZ	83.95	-0.3525	-3176.5	150.012	25.5799	13.9211	2.72934	0.657392	2.06065	0.219329	0.0660713	0.754999	9.37221	41.3089	21.1762	0.0803598	TRUE	9.38472
PS59-231-020	GL	WVZ	83.95	-0.3525	-3176.5	150.012	55.3683	14.1247	4.71523	0.632753	4.48689	0.397635	0.106391	0.951574	11.7424	44.3197	22.3227	0.08433	FALSE	10.348
PS59-232-001	GL	WVZ	84.1658	1.00667	-3577	178.162	40.8123	11.0586	3.23804	0.494387	3.67751	0.245997	0.0693518	1.13572	12.604	46.69	22.3683	0.075971	FALSE	11.8547
PS59-232-002	GL	WVZ	84.1658	1.00667	-3577	178.162	46.3972	12.4185	3.50422	0.577402	4.1363	0.274223	0.0743839	1.18038	13.2404	47.1099	21.5076	0.078255	TRUE	14.7171
PS59-232-003	GL	WVZ	84.1658	1.00667	-3577	178.162	40.8648	10.8666	3.35345	0.499385	3.46724	0.246769	0.0716043	1.03393	12.1859	46.833	21.76	0.0735867	TRUE	10.8163
PS59-232-004	GL	WVZ	84.1658	1.00667	-3577	178.162	45.366	12.1127	3.58355	0.493305	3.96579	0.277272	0.0771605	1.10666	12.6595	46.4428	24.5542	0.0773736	FALSE	7.37197
PS59-232-006	GL	WVZ	84.1658	1.00667	-3577	178.162	50.0891	12.057	3.75785	0.53296	4.43594	0.291855	0.0805038	1.18045	13.3292	46.6791	22.6227	0.0776654	FALSE	13.043
PS59-232-009	GL	WVZ	84.1658	1.00667	-3577	178.162	41.7926	11.1308	3.43196	0.482235	3.57899	0.250237	0.0779364	1.04284	12.1775	44.0355	23.0817	0.0729135	FALSE	11.0921
PS59-232-030	GL	WVZ	84.1658	1.00667	-3577	178.162	42.4538	11.1634	3.46233	0.482177	3.80263	0.264247	0.070934	1.09829	12.2616	48.8106	23.1521	0.0763206	FALSE	7.1259
PS59-232-044	GL	WVZ	84.1658	1.00667	-3577	178.162	50.8776	12.2162	3.74107	0.491465	4.53584	0.28447	0.0763419	1.21244	13.5997	49.0042	24.8567	0.0760396	FALSE	7.1087
PS59-232-054	GL	WVZ	84.1658	1.00667	-3577	178.162	41.9469	11.4334	3.37956	0.502376	3.76887	0.256758	0.0690819	1.1152	12.4119	48.9211	22.7586	0.0759739	FALSE	8.26637
PS59-232-056	GL	WVZ	84.1658	1.00667	-3577	178.162	50.8967	13.6209	3.93342	0.659786	4.52795	0.307111	0.086461	1.15115	12.9395	45.4936	20.6444	0.0780774	TRUE	17.2001
PS59-232-082	GL	WVZ	84.1658	1.00667	-3577	178.162	46.1387	12.3647	3.57645	0.506785	4.05821	0.26465	0.0754258	1.1347	12.9007	47.4168	24.3983	0.073998	FALSE	7.46803
PS59-232-105	GL	WVZ	84.1658	1.00667	-3577	178.162	47.6398	12.4925	3.63267	0.566961	4.01467	0.284836	0.0791361	1.10516	13.1143	45.9041	22.0342	0.0784094	FALSE	13.5649
PS59-232-105B1	GL	WVZ	84.1658	1.00667	-3577	178.162	42.6176	11.4789	3.45801	0.52153	3.65972	0.254322	0.0739457	1.05833	12.3243	46.7642	22.01	0.0735457	FALSE	10.9448
PS59-232-105C	GL	WVZ	84.1658	1.00667	-3577	178.162	50.3368	12.0926	3.72005	0.565661	4.48847	0.283722	0.0770326	1.20656	13.5312	48.2918	21.3777	0.0762683	TRUE	14.5948
PS59-243-028	GL	SMZ	84.9783	10.0442	-4106.5	310.21	53.0761	12.3143	4.18458	0.53164	6.16414	0.305537	0.0856084	1.47306	12.6837	48.8805	23.1629	0.0730148	FALSE	13.2468
PS59-243-046	GL	SMZ	84.9783	10.0442	-4106.5	310.21	52.4803	11.9979	4.22603	0.530559	6.09225	0.314169	0.0847737	1.4416	12.4183	49.8507	22.6136	0.0743413	FALSE	12.5317
PS59-244-002	GL	SMZ	85.0417	11.0783	-3922	320.396	84.265	18.1177	6.53107	0.806871	9.81105	0.521023	0.144093	1.50221	12.9022	45.3254	22.4543	0.0797761	FALSE	18.9622
PS59-244-018	GL	SMZ	85.0417	11.0783	-3922	320.396	160.457	28.111	12.6263	1.20094	21.0029	1.03679	0.265797	1.66343	12.7081	47.5036	23.4075	0.0821134	FALSE	17.0241
PS59-248-059	GL	SMZ	85.2208	13.4183	-3502	351.324	108.787	16.6097	7.29926	0.708752	12.284	0.577779	0.148508	1.68291	14.9038	49.1504	23.4351	0.0791558	FALSE	18.6883
PS59-251-033	GL	SMZ	85.7	20.24		433.5	90.7114	18.9767	9.03011	0.891671	8.23557	0.607277	0.186468	0.912011	10.0454	48.4271	21.2822	0.0672503	TRUE	5.35235
PS59-252-001	GL	SMZ	85.62	18.2217	-4028	413.089	200.273	22.3368	15.3998	0.953585	19.1646	1.15424	0.29109	1.24447	13.0049	52.9039	23.424	0.0749513	FALSE	5.72193
PS59-252-SG1	GL	SMZ	85.62	18.2217	-4028	413.089	200.269	22.6741	15.657	0.952907	18.5647	1.18538	0.294528	1.18571	12.791	53.1597	23.7946	0.0757091	FALSE	3.54416
PS59-252-SG2	GL	SMZ	85.62	18.2217	-4028	413.089	199.71	22.6199	15.436	0.982165	18.4663	1.17759	0.304685	1.19631	12.938	50.6621	23.0307	0.0762886	FALSE	7.93428
PS59-255-004	GL	SMZ	85.785	20.2767	-4378	437.442	99.3398	15.4681	8.58706	0.642033	9.07835	0.597599	0.165836	1.05721	11.5685	51.7803	24.0923	0.0695929	FALSE	0.689121
PS59-255-006	GL	SMZ	85.785	20.2767	-4378	437.442	103.446	16.3148	8.89875	0.691593	9.0812	0.619625	0.172074	1.0205	11.6248	51.7145	23.5902	0.0696306	FALSE	1.28733
PS59-260	GL	SMZ	85.9667	29.135	-4477	512.263	100.867	24.6926	12.5172	0.935893	7.82988	0.795679	0.2345	0.625528	8.05823	53.3783	26.384	0.0635666	FALSE	-16.8818
PS59-263-069	GL	EVZ	86.0483	30.6467	-4199	528.005	75.9571	19.3869	10.4411	0.702554	6.23991	0.634633	0.195729	0.597631	7.27483	53.3446	27.5949	0.0607822	FALSE	-20.7852
PS59-263-075	GL	EVZ	86.0483	30.6467	-4199	528.005	89.111	23.1067	13.745	0.80206	7.71741	0.863563	0.257057	0.56147	6.48315	53.4706	28.8092	0.0628274	FALSE	-24.9906
PS59-266-030	GL	EVZ	86.32	38.655	-4838.5	598.381	83.7913	20.6787	11.4871	0.749358	7.0162	0.725273	0.219583	0.610787	7.29436	52.3135	27.5953	0.0631378	FALSE	-19.5301
PS59-270-010	GL	EVZ	86.7425	49.8425	-4766	682.277	60.125	18.3	9.46824	0.713509	4.60011	0.540719	0.187662	0.485847	6.35017	50.4537	25.6479	0.0571087	FALSE	-16.9717
PS59-270-014	GL	EVZ	86.7425	49.8425	-4766	682.277	60.196	18.1171	9.44992	0.741321	4.83186	0.528546	0.186758	0.511312	6.37	50.5997	24.439	0.0559312	FALSE	-14.29
PS59-270-016	GL	EVZ	86.7425	49.8425	-4766	682.277	64.752	19.5264	10.3008	0.744024	4.97584	0.59554	0.198185	0.483053	6.28611	51.9757	26.2443	0.0578149	FALSE	-19.818
PS59-270-036	GL	EVZ	86.7425	49.8425	-4766	682.277	60.5169	18.2858	9.41981	0.698578	4.7764	0.554974	0.204505	0.507059	6.42443	46.0614	26.1758	0.0589156	FALSE	-13.2129
PS59-271-002	GL	EVZ	86.8292	47.8083	-4364.5	678.573	27.7826	15.2469	5.27794	0.626609	2.32166	0.286578	0.111829	0.43988	5.26391	47.1965	24.3324	0.0542972	FALSE	-13.2937
PS59-271-005	GL	EVZ	86.8292	47.8083	-4364.5	678.573	58.2824	16.3941	8.94287	0.642492	5.07474	0.538975	0.174806	0.567463	6.5172	51.1587	25.5164	0.0602687	FALSE	-15.9554
PS59-271-005A	GL	EVZ	86.8292	47.8083	-4364.5	678.573	28.1327	15.8453	5.37057	0.619247	2.31169	0.302352	0.11431	0.430437	5.23831	46.9826	25.588	0.0562978	FALSE	-15.7684
PS59-271-007	GL	EVZ	86.8292	47.8083	-4364.5	678.573	58.9145	16.8003	9.2887	0.65043	5.11977	0.529455	0.177915	0.551183	6.3426	52.2087	25.8295	0.0569999	FALSE	-18.1203
PS59-271-014	GL	EVZ	86.8292	47.8083	-4364.5	678.573	59.7356	17.2564	9.39272	0.611454	4.9882	0.559747	0.182129	0.531071	6.35978	51.5718	28.2218	0.0595937	FALSE	-22.5457
PS59-271-018	GL	EVZ	86.8292	47.8083	-4364.5	678.573	52.1279	14.8763	6.87945	0.584297	4.32871	0.451757	0.140362	0.629224	7.57733	49.0124	25.4602	0.0656675	FALSE	-11.2861
PS59-271-058	GL	EVZ	86.8292	47.8083	-4364.5	678.573	58.4185	16.5097	9.10706	0.641795	5.23423	0.551049	0.175074	0.574744	6.41463	52.0185	25.7242	0.0605079	FALSE	-17.2653
PS59-274-008	GL	EVZ	86.7258	66.8667	-4567	807.472	22.3989	7.74638	0.899278	0.988833	3.53806	0.317988	0.08655	3.93433	24.9076	10.3903	7.83387	0.353604	TRUE	136.428
PS59-274-014	GL	EVZ	86.7258	66.8667	-4567	807.472	38.4896	9.17795	1.10895	1.28412	5.77303	0.519501	0.138556	5.20587	34.7083	8.00357	7.14727	0.468464	TRUE	172.982
PS59-274-028	GL	EVZ	86.7258	66.8667	-4567	807.472	36.9571	8.74382	1.05549	1.29182	5.46388	0.502191	0.133506	5.17663	35.0142	7.90592	6.7686	0.47579	TRUE	173.826
PS59-274-060	GL	EVZ	86.7258	66.8667	-4567	807.472	38.7445	9.22555	1.09568	1.36804	5.7062	0.509576	0.141288	5.20791	35.3612	7.75493	6.74364	0.465078	TRUE	174.982
PS59-274-072	GL	EVZ	86.7258	66.8667	-4567	807.472	37.242	9.00735	1.06691	1.27616	5.59681	0.490067	0.131297	5.24579	34.9063	8.12595	7.05819	0.459331	TRUE	173.913
PS59-275-004	GL	EVZ	86.5867	69.0233	-3076	831.178	68.0647	18.3246	9.67915	0.764985	5.49272	0.573706	0.215109	0.56748	7.0321	44.9965	23.9542	0.0592724	FALSE	-5.94783
PS59-276-005	GL	EVZ	86.5967	70.365	-4142	839.326	43.7868	26.5903	10.3691	1.04157	3.7449	0.550413	0.224075	0.36116	4.22283	46.2751	25.529	0.0530822	FALSE	-17.4037
PS59-289-005	GL	EVZ	86.4708	69.9658	-3616	839.326	32.3826	15.3235	5.17035	0.72121	2.89575	0.358435	0.123744	0.560069	6.26314	41.7827	21.2469	0.0693251	TRUE	1.49294
PS59-289-069	GL	EVZ	86.4708	69.9658	-3616	839.326	31.3359	14.6866	5.02103	0.706923	2.89276	0.334859	0.116889	0.576128	6.24092	42.9557	20.7754	0.0666913	FALSE	1.47266
PS59-289-072	GL	EVZ	86.4708	69.9658	-3616	839.326	32.433	15.3173	5.15483	0.763591	2.7851	0.349881	0.126961	0.540291	6.29178	40.6015	20.0596	0.0678744	TRUE	4.7922
PS59-290-042	GL	EVZ	86.5483	69.3583	-3025	834.326	16.6698	14.1285	3.68033	0.589842	1.3137	0.214244	0.0823517	0.356952	4.52942	44.6904	23.9529	0.0582132	FALSE	-12.3008
PS59-290-044	GL	EVZ	86.5483	69.3583	-3025	834.326	15.3111	13.3519	3.41143	0.594604	1.15564	0.193287	0.0686744	0.338755	4.48817	49.6754	22.4551	0.0566588	FALSE	-14.6208
PS59-290-056	GL	EVZ	86.5483	69.3583	-3025	834.326	16.971	14.1697	3.83576	0.597917	1.3118	0.209298	0.0800875	0.341993	4.42441	47.8946	23.6985	0.0545648	FALSE	-15.3675
PS59-290-058	GL	EVZ	86.5483	69.3583	-3025	834.326	14.9164	13.0335	3.50098	0.553753	1.11215	0.186813	0.0737164	0.317669	4.26064	47.4926	23.5367	0.0533601	FALSE	-15.236
PS59-290-104	GL	EVZ	86.5483	69.3583	-3025	834.326	22.4049	14.9633	4.47071	0.585675	1.77189	0.257337	0.0931531	0.396334	5.0115	47.9931	25.5488	0.0575607	FALSE	-17.5296
PS59-293-005	GL	EVZ	86.9108	58.555	-3932	744.782	37.0482	16.9448	6.40761	0.65549	2.94885	0.362917	0.139075	0.460211	5.7819	46.0731	25.8505	0.0566384	FALSE	-14.1764
PS59-293-007	GL	EVZ	86.9108	58.555	-3932	744.782	37.0718	16.8508	6.38588	0.68647	3.07033	0.371144	0.136604	0.480801	5.80528	46.7472	24.547	0.0581196	FALSE	-11.9018
PS59-293-015	GL	EVZ	86.9108	58.555	-3932	744.782	24.1957	14.6446	4.49693	0.602006	1.80295	0.255482	0.101655	0.400929	5.38049	44.2373	24.3264	0.0568125	FALSE	-10.7435
PS59-293-017	GL	EVZ	86.9108	58.555	-3932	744.782	37.3853	16.855	6.56481	0.635498	2.92339	0.364957	0.138462	0.445312	5.6948	47.4124	26.5225	0.0555929	FALSE	-17.2051
PS59-293-037	GL	EVZ	86.9108	58.555	-3932	744.782	19.9786	12.5697	3.70067	0.494562	1.4912	0.212222	0.070499	0.402955	5.39865	52.4925	25.4159	0.057347	FALSE	-21.1219
PS59-293-043	GL	EVZ	86.9108	58.555	-3932	744.782	25.0657	13.4058	4.63224	0.590013	2.06579	0.26314	0.0917765	0.445959	5.41113	50.4731	22.7211	0.0568061	FALSE	-13.0503
PS59-294-018	GL	EVZ	86.8967	56.2333	-4068	732.466	11.1896	10.6266	2.42968	0.510302	1.17354	0.157218	0.0574726	0.483003	4.60536	42.2754	20.8242	0.0647075	FALSE	-1.63119
PS59-294-050	GL	EVZ	86.8967	56.2333	-4068	732.466	15.1282	11.0964	3.17034	0.48194	1.25035	0.18237	0.0627825	0.394392	4.7718	50.4972	23.0245	0.0575238	FALSE	-15.3497
PS59-295-001	GL	EVZ	86.8108	52.195	-4608	700.982	68.5771	18.3715	9.81316	0.781805	5.5534	0.574015	0.201731	0.565913	6.98828	48.6449	23.4988	0.0584944	FALSE	-8.7702
PS59-295-002	GL	EVZ	86.8108	52.195	-4608	700.982	56.7059	16.6413	8.26691	0.700563	4.65976	0.500982	0.168513	0.563663	6.85938	49.0579	23.7541	0.0606009	FALSE	-9.90809
PS59-295-009	GL	EVZ	86.8108	52.195	-4608	700.982	67.6215	18.3454	9.75079	0.774289	5.30482	0.59979	0.20541	0.54404	6.93498	47.4699	23.6932	0.0615119	FALSE	-8.38686
PS59-295-015	GL	EVZ	86.8108	52.195	-4608	700.982	67.9593	18.1707	9.84819	0.707399	5.36871	0.584391	0.21652	0.545146	6.90069	45.4839	25.6866	0.0593399	FALSE	-10.4189
PS59-295-SG	GL	EVZ	86.8108	52.195	-4608	700.982	67.2088	18.1249	9.83523	0.710912	5.15185	0.594755	0.202451	0.523816	6.83348	48.5808	25.4953	0.0604718	FALSE	-13.5472
PS59-297-001	GL	EVZ	86.6767	46.9825	-4742.5	663.942	16.2122	7.68028	2.94472	0.301969	1.31688	0.162541	0.060159	0.447199	5.50551	48.949	25.434	0.0551974	FALSE	-16.8013
PS59-297-004	GL	EVZ	86.6767	46.9825	-4742.5	663.942	16.4801	7.78813	2.9601	0.316471	1.30304	0.162824	0.0607722	0.440203	5.56742	48.7081	24.6093	0.0550062	FALSE	-14.9292
PS59-297-009	GL	EVZ	86.6767	46.9825	-4742.5	663.942	22.6705	9.23169	3.72663	0.390063	1.75988	0.21809	0.0781545	0.472244	6.08337	47.6829	23.6672	0.058522	FALSE	-10.8169
PS59-297-037	GL	EVZ	86.6767	46.9825	-4742.5	663.942	23.1482	9.59432	3.84651	0.379115	1.79227	0.227716	0.0802309	0.465948	6.01797	47.943	25.3072	0.0592007	FALSE	-14.5429
PS59-297-044	GL	EVZ	86.6767	46.9825	-4742.5	663.942	2.1618	4.46424	0.700087	0.21336	0.185907	0.0448801	0.0172047	0.265548	3.0879	40.6917	20.9235	0.0641065	FALSE	-5.63246
PS59-297-065	GL	EVZ	86.6767	46.9825	-4742.5	663.942	2.27923	4.59509	0.707485	0.248697	0.173044	0.0453737	0.0201786	0.244591	3.2216	35.0612	18.4767	0.0641338	FALSE	4.7645
PS59-297-081	GL	EVZ	86.6767	46.9825	-4742.5	663.942	22.8034	9.35332	3.796	0.38771	1.84097	0.211979	0.0813173	0.484975	6.00721	46.6814	24.1245	0.0558427	FALSE	-10.6457
PS59-299-001	GL	EVZ	86.7475	46.2933	-4589.5	664.868	3.81907	5.3859	0.924939	0.248574	0.198003	0.0569796	0.0260693	0.214071	4.129	35.4799	21.6671	0.0616036	FALSE	-1.22256
PS59-301-030	GL	EVZ	86.6292	41.2367	-2560.5	627.272	71.4559	18.6745	10.5558	0.722547	5.53113	0.653113	0.219119	0.523988	6.76933	48.1741	25.8454	0.0618723	FALSE	-13.9279
PS59-301-SG	GL	EVZ	86.6292	41.2367	-2560.5	627.272	5.0835	4.0069	0.971067	0.177418	0.367554	0.0650992	0.0219268	0.378505	5.23497	44.2868	22.5845	0.0670389	FALSE	-7.84923
PS59-305-040	GL	EVZ	86.4192	41.0817	-4456	619.309	36.1068	13.3208	5.47618	0.551044	2.63999	0.315692	0.112716	0.482086	6.59343	48.5837	24.1737	0.0576482	FALSE	-11.8691
PS59-305-SG1	GL	EVZ	86.4192	41.0817	-4456	619.309	82.236	24.0925	12.3217	0.915646	6.91435	0.820797	0.256319	0.561152	6.67408	48.0717	26.312	0.066614	FALSE	-14.3347
PS59-305-SG2	GL	EVZ	86.4192	41.0817	-4456	619.309	93.4837	20.1263	12.5022	0.768623	7.1133	0.758541	0.257669	0.568966	7.4774	48.5203	26.1848	0.0606728	FALSE	-13.2871
PS59-305-SG3	GL	EVZ	86.4192	41.0817	-4456	619.309	52.8109	16.6073	8.28316	0.655696	4.15763	0.50671	0.175611	0.501938	6.37569	47.1676	25.3277	0.0611735	FALSE	-12.7681
PS59-306-026	GL	EVZ	86.4117	40.6883	-4567.5	615.234	63.9285	18.8823	9.96273	0.669194	5.25969	0.624592	0.207769	0.527936	6.41676	47.9511	28.2165	0.0626928	FALSE	-18.8815
PS59-307-012	GL	EVZ	86.3533	38.145	-4707	596.159	49.0652	16.3504	7.13356	0.631959	3.96445	0.452796	0.144656	0.555746	6.87807	49.3139	25.8726	0.063474	FALSE	-14.4936
PS59-307-020	GL	EVZ	86.3533	38.145	-4707	596.159	68.2526	18.6776	9.90279	0.68929	5.58644	0.610832	0.187814	0.564127	6.89226	52.7266	27.0969	0.0616828	FALSE	-20.2094
PS59-307-SG1	GL	EVZ	86.3533	38.145	-4707	596.159	48.2008	15.9016	6.91512	0.638394	3.84701	0.437008	0.141231	0.556319	6.97035	48.9631	24.9087	0.0631961	FALSE	-12.0773
PS59-309-001	GL	EVZ	86.2375	35.8942	-4631	574.676	95.3339	21.6808	13.1092	0.756444	8.00664	0.830769	0.251681	0.610766	7.27231	52.0864	28.6615	0.0633731	FALSE	-21.4667
PS59-309-037	GL	EVZ	86.2375	35.8942	-4631	574.676	57.3946	17.0733	7.46932	0.695916	4.46309	0.471958	0.153982	0.597523	7.68405	48.5077	24.5335	0.0631863	FALSE	-9.2543
PS59-309-039	GL	EVZ	86.2375	35.8942	-4631	574.676	57.7108	17.1004	7.32965	0.684658	4.48211	0.460828	0.15036	0.611504	7.87361	48.7475	24.9765	0.0628717	FALSE	-9.90488
PS59-310-001	GL	EVZ	86.0092	32.51	-4059	541.71	102.57	25.5419	15.8024	0.878413	9.90668	0.979851	0.305689	0.626912	6.4908	51.6943	29.0773	0.0620066	FALSE	-22.7581
PS59-311-002	GL	EVZ	85.96	31.1625	-3464	528.376	61.8227	15.1287	8.02341	0.592814	5.31167	0.506287	0.159801	0.662022	7.7053	50.2087	25.5201	0.0631013	FALSE	-11.9313
PS59-312-011	GL	SMZ	85.905	27.2992	-4105.5	498.558	92.6264	20.7838	11.8579	0.782333	8.46686	0.772756	0.238345	0.714026	7.81136	49.751	26.5664	0.065168	FALSE	-12.6376
PS59-313-026	GL	SMZ	85.9	25.7		483.9	19.5086	8.60528	2.28075	0.353566	1.60037	0.146913	0.0398798	0.701687	8.55358	57.1908	24.3385	0.0644143	FALSE	-14.7675
PS59-315-001	GL	SMZ	85.8083	20.45	-4762	440.22	83.0644	16.4602	8.38841	0.698883	8.28905	0.573279	0.166919	0.988155	9.90228	50.2544	23.5522	0.0683418	FALSE	-0.0731535
PS59-315-002A	GL	SMZ	85.8083	20.45	-4762	440.22	83.8727	16.4513	8.069	0.675328	8.00342	0.565795	0.167497	0.991873	10.3944	48.174	24.3605	0.0701196	FALSE	1.13531
PS59-318-098A	GL	SMZ	85.8567	22.2933	-4802	457.259	120.155	29.1213	16.3225	1.1356	11.2739	1.11942	0.326952	0.690695	7.36128	49.9232	25.644	0.0685815	FALSE	-11.945
#TRUE means this sample passes the BABB filter, and FALSE not.
