# Supplementary material for: The subduction influence on ocean ridge basalts and its significance
Source: Research Square preprint supplement (doi:10.21203/rs.3.rs-132754/v1), 2021-01-08
Supplement: Supplementary file 7 [file 45eec7d352fc14f12b7163eb.xlsx]

## Sheet: table 1
Table 1 Chemical and isotopic compositions of MORB from Dredge 274 and 55, Gakkel Ridge
Sample	PS59-274-008	PS59-274-014	PS59-274-028	PS59-274-060	PS59-274-072	HLY0102-055-003	HLY0102-055-009	HLY0102-055-017	HLY0102-055-019	HLY0102-055-HE	HLY0102-055-SG
Dredge No.	274	274	274	274	274	55	55	55	55	55	55
Latitude (°N)	86.7258	86.7258	86.7258	86.7258	86.7258	87.0308	87.0308	87.0308	87.0308	87.0308	87.0308
Longitude (°E)	66.8667	66.8667	66.8667	66.8667	66.8667	59.4708	59.4708	59.4708	59.4708	59.4708	59.4708
Depth	-4567	-4567	-4567	-4567	-4567	-4173.5	-4173.5	-4173.5	-4173.5	-4173.5	-4173.5
Along-axis distance (km)	807.472	807.472	807.472	807.472	807.472	753.208	753.208	753.208	753.208	753.208	753.208
SiO2	49.3911	50.3337	50.3738	50.3647	50.1644	49.2744	48.8242	49.0937	48.3315	48.3294	48.6593
TiO2	1.01832	1.06055	1.03189	1.05122	1.03513	1.01884	1.0379	1.03075	1.04012	1.04518	1.02259
Al2O3	17.2508	17.1107	17.1937	17.0509	17.1725	17.2194	17.7276	17.2948	17.8452	17.8143	17.6628
FeO	9.46245	8.85682	8.71156	8.8712	8.79716	9.65646	9.47551	9.54831	9.58762	9.63851	9.55681
MnO	0.16795	0.165671	0.162499	0.164486	0.162847	0.174859	0.17362	0.174924	0.175362	0.174726	0.173693
MgO	8.79838	8.28468	8.44786	8.33327	8.39627	8.54068	8.58361	8.967	8.74111	8.79002	8.86539
CaO	10.2792	10.6239	10.5551	10.5921	10.7104	10.6032	10.7216	10.4939	10.8338	10.811	10.6883
Na2O	3.12043	2.97648	2.96196	3.01156	3.01332	3.05573	3.00263	2.9568	2.99506	2.97968	2.94994
K2O	0.135038	0.191476	0.186692	0.190271	0.184121	0.0657601	0.0631425	0.0635342	0.0639518	0.0611689	0.0638879
P2O5	0.0658396	0.0655136	0.0635749	0.066654	0.0650618	0.0754952	0.076812	0.0746865	0.0762436	0.0789533	0.0773341
total	99.6895	99.6696	99.6887	99.6963	99.7013	99.6848	99.6867	99.6984	99.69	99.7229	99.72
H2O	0.247		0.234	0.241					0.288
Li	6.27305	6.68039	6.45754	6.82296	6.52152	5.48257	4.31382	4.46988	4.83711	3.50973	4.21974
B	1.68497	1.91403	1.90477	2.37782	2.26443	0.661542	0.41026	0.919681	0.976822	0.670231	0.907421
Be	0.440816	0.470172	0.464932	0.424553	0.431624	0.296217	0.500917	0.44709	0.445474	0.484463	0.367859
Sc	34.6842	35.6005	34.8103	34.8755	35.3764	39.1781	40.5116	38.0737	39.9167	40.0604	40.8695
V	169.615	188.497	181.062	189.917	187.175	168.039	169.558	164.699	168.145	169.873	168.845
Cr	312.026	299.547	290.962	303.277	301.899	280.712	266.742	279.541	290.911	290.375	285.96
Co	46.3169	43.4554	42.8119	43.9651	44.4252	46.5468	45.8654	46.8492	45.8883	49.0834	47.4626
Ni	155.646	120.013	127.61	124.855	131.848	144.096	141.012	156.643	145.939	170.699	156.63
Cu	92.8826	87.0191	86.7376	91.3177	92.3625	96.5509	92.0965	97.1679	95.9789	108.023	94.9167
Zn	66.559	61.2524	60.8939	63.0352	62.4034	58.7948	61.0638	60.2429	61.2535	63.3925	67.7325
Ga	15.6089	15.1273	14.9251	15.4143	15.575	15.243	14.9722	14.3198	14.6315	15.19	14.6966
Ge	1.32816	1.30992	1.21309	1.2704	1.2694	1.38339	1.39855	1.33332	1.41664	1.30086	1.34102
Rb	3.53806	5.77303	5.46388	5.7062	5.59681	0.826346	0.788743	0.82156	0.791646	0.844014	0.825324
Sr	130.199	111.255	110.037	111.144	112.411	138.911	144.407	140.937	146.101	149.161	143.77
Y	24.7677	25.265	24.1777	24.6308	24.7742	26.6145	28.1862	26.7304	27.5581	28.0626	28.3685
Zr	65.1425	76.7623	73.7259	75.2517	74.8684	67.8879	71.2083	68.3465	70.163	70.9217	71.6536
Nb	0.899278	1.10895	1.05549	1.09568	1.06691	1.01177	1.03518	1.01946	1.01261	1.0607	1.00964
Mo	0.159873	0.135045	0.148452	0.172926	0.146849	0.145831	0.170469		0.162449	0.166279	0.202092
Ag	0.0317624	0.0372903	0.0337343	0.0467807	0.0347747	0.069543	0.0238411	0.0302083	0.0498291	0.0189439	0.0242637
Cd	0.128466	0.12936	0.115101	0.12106	0.141259	0.0619065	0.150471	0.0956162	0.13638	0.150501	0.147898
In	0.0604705	0.0554362	0.056261	0.0670548	0.0675156	0.0614587	0.0658834	0.062989	0.0685906	0.0616316	0.0642502
Sn	0.708589	0.713993	0.686475	0.742223	0.773395	0.746792	0.680696	0.724695	0.68062	0.740791	0.684143
Sb	0.0181381	0.0270098	0.0253813	0.028215	0.0212378	0.00436261	0.0123153	0.0131668	0.000561419	0.00390871	0.00782869
Cs	0.157929	0.237465	0.219704	0.249299	0.23922	0.0308227	0.0263912	0.0333957	0.0286651	0.0295744	0.0297342
Ba	22.3989	38.4896	36.9571	38.7445	37.242	5.69881	5.66754	5.82222	5.92542	5.77827	5.88247
La	2.51422	3.25975	3.1024	3.21664	3.15325	2.11413	2.16112	2.10775	2.08103	2.1611	2.14661
Ce	7.74638	9.17795	8.74382	9.22555	9.00735	6.70818	7.0081	6.71612	6.94038	7.02692	6.78185
Pr	1.29075	1.46861	1.41524	1.49554	1.43741	1.13731	1.17026	1.13474	1.1829	1.1531	1.17355
Nd	6.92784	7.79092	7.48448	7.69403	7.62979	6.39605	6.56856	6.18575	6.37176	6.45327	6.27815
Sm	2.38927	2.64959	2.48537	2.55703	2.46937	2.27541	2.32955	2.2303	2.25823	2.27629	2.21644
Eu	0.942299	0.99158	0.960063	0.971233	0.984808	0.925998	0.932846	0.89449	0.900506	0.962706	0.933516
Gd	3.16883	3.378	3.2748	3.32791	3.37389	3.15261	3.19506	3.07236	3.24229	3.22868	3.17447
Tb	0.596862	0.622986	0.596308	0.610117	0.609579	0.575047	0.615947	0.589214	0.617069	0.628295	0.626368
Dy	4.01378	4.15083	3.97934	4.02964	4.12699	4.13816	4.41823	4.23591	4.31967	4.42626	4.36077
Ho	0.878214	0.901064	0.87697	0.881564	0.889451	0.96188	1.00798	0.949062	0.987829	0.994978	1.00343
Er	2.55749	2.57932	2.48138	2.49074	2.48044	2.81622	3.0644	2.83224	2.85369	2.95072	2.96113
Tm	0.375741	0.402893	0.376092	0.368276	0.37803	0.439654	0.462907	0.429132	0.458752	0.453888	0.436515
Yb	2.47344	2.50427	2.39068	2.44224	2.49499	2.97089	3.01815	2.88969	3.05206	3.12241	2.9843
Lu	0.396578	0.385061	0.375897	0.370359	0.375085	0.449839	0.489856	0.445976	0.452198	0.451696	0.468688
Hf	1.7157	2.02205	1.95326	1.94141	1.9496	1.72353	1.72398	1.65322	1.61549	1.68286	1.68577
Ta	0.0629407	0.0808937	0.0762154	0.0735214	0.0756059	0.0768258	0.0743782	0.0723108	0.0734137	0.0681483	0.0728558
W	0.0391101	0.086463	0.0737109	0.0886401	0.0816946	0.0194912	0.0182756	0.0187739	0.0153526	0.0140573	0.0184935
Tl	0.0260225	0.0383374	0.0323617	0.0373237	0.0325713	0.00930877	0.0176053	0.0126628	0.014957	0.0127969	0.0176419
Pb	0.988833	1.28412	1.29182	1.36804	1.27616	0.417203	0.446141	0.426305	0.464376	0.425938	0.429902
Th	0.317988	0.519501	0.502191	0.509576	0.490067	0.0966325	0.0986854	0.100491	0.102182	0.11227	0.103653
U	0.08655	0.138556	0.133506	0.141288	0.131297	0.0388206	0.0417746	0.0426108	0.0452501	0.0409217	0.037574
Nb/U	10.3903	8.00357	7.90592	7.75493	8.12595	26.0626	24.7802	23.9248	22.3781	25.9203	26.8708
Ce/Pb	7.83387	7.14727	6.7686	6.74364	7.05819	16.0789	15.7083	15.7543	14.9456	16.4975	15.7753
H2O/Ce	318.858		267.617	261.231					414.963
87Sr/86Sr	0.703577	0.70374	0.703782	0.703728	0.703705	0.702894	0.702889		0.702874
2SE combined error	2.06155e-05	2.24722e-05	2.10238e-05	1.78314e-05	2.03214e-05	8.94427e-06	8.94427e-06		9.1236e-06
143Nd/144Nd	0.512887	0.51287	0.512883	0.512885	0.512874	0.513099	0.513078		0.513101
2SE combined error	1.62718e-05	1.9252e-05	1.9252e-05	1.46779e-05	1.76477e-05	2.0025e-05	1.30246e-05		1.30384e-05
206Pb/204Pb	18.267	18.48	18.471	18.469	18.47	18.327	18.312		18.3207
2SE combined error	0.0011	0.0009	0.0009	0.0011	0.0009	0.0012	0.0028		0.0028
207Pb/204Pb	15.529	15.55	15.5391	15.538	15.54	15.474	15.465		15.4646
2SE combined error	0.0012	0.0009	0.0009	0.0012	0.0009	0.0011	0.0035		0.0035
208Pb/204Pb	38.109	38.41	38.3876	38.384	38.41	37.986	37.952		37.9593
2SE combined error	0.0029	0.0023	0.0023	0.0029	0.0023	0.0031	0.0074		0.0074
Note: 2SE error reported for isotope ratios are calculated as the square roots of the sum of the squares of 2SE internal error and the 2SD external error.
