# Supplementary material for: The subduction influence on ocean ridge basalts and its significance
Source: Research Square preprint supplement (doi:10.21203/rs.3.rs-132754/v1), 2021-01-08
Supplement: Supplementary file 8 [file 47626625e93c1c77c8ceaff6.xlsx]

## Sheet: Table 5
Table 5. Average Pacific, BABB-like MORB and arc volcanics compositions used in the model
	melt volume	MgO	Cs	Rb	Ba	U	Th	Nb	K		XCs	XRb	XBa	XU	XTh	XK
	km3/yr	wt.%	ppm								km3/yr*ppm
Pacific MORB		7.64272	0.0335527	2.66874	27.269	0.114971	0.346759	5.58275	1472.74
BABB-like MORB	2.94a	7.50829	0.10231	5.89094	65.1701	0.190302	0.672691	7.5414	2504.4		0.167538	6.72055	83.3021	0.102883	0.60057	1513.99
Arc volcanics	3b		0.541232	12.573	231.667	0.479313	1.2377	1.81259	5905.08		1.59101	35.1196	668.439	1.32595	3.37535	16280.7
	MgO	K2O	TiO2	P2O5	Cs	Rb	Ba	Th	U	Nb	Ta	La	Ce	Pb	Pr	Sr	Nd	Zr	Hf	Sm	Eu	Gd	Dy	Lu
	wt.%	wt.%	wt.%	wt.%	ppm	ppm	ppm	ppm	ppm	ppm	ppm	ppm	ppm	ppm	ppm	ppm	ppm	ppm	ppm	ppm	ppm	ppm	ppm	ppm
Pacific MORB	7.64272	0.177389	1.6106	0.1692	0.0335527	2.66874	27.269	0.346759	0.114971	5.58275	0.357014	5.03651	13.6312	0.527842	2.15832	133.567	11.0791	104.958	2.65317	3.61168	1.30072	4.70888	5.56093	0.4874
BABB-like MORB	7.50829	0.301651	1.52649	0.188055	0.10231	5.89094	65.1701	0.672691	0.190302	7.5414	0.456901	6.88286	16.9036	0.849308	2.41809	161.647	12.255	110.479	2.67674	3.69255	1.31405	4.66132	5.29171	0.461372
enrichment facotrsc		1.7005	0.947775	1.11143	3.04924	2.20739	2.3899	1.93994	1.65521	1.35084	1.27978	1.36659	1.24007	1.60902	1.12036	1.21023	1.10613	1.0526	1.00888	1.02239	1.01025	0.9899	0.951588	0.946599
note: Compositions for Pacific MORB were averaged for samples with MgO higher than 6 wt%, in order to minimize the effect of different degrees of magma differentiation for Pacific MORB with BABB-like MORB.
Compositions for arc volcanics are averages for global arc averages at MgO of 6 wt% in Turner and Langmuir 2015.
Calculation on subduction flux X for Rb, Ba, U, Th, and K can be found in the main context.
aMelt production at global ocean ridges has been estimated to be 21 km3/yr (Crisp, 1984), and the volume of BABB-influenced ocean crust, which makes up 12% of global ocean ridge production is 2.5 km3/yr.
bMelt production at arcs can be estimated to be 3km3 per year, calculated with the average arc magmatic addition rate of 60km3/Ma/km (average from Dimalanta et al., 2002), along with the ~50,000km length of global arcs (Bird, 2003).
cEnrichment factors of BABB-like MORB relative to Pacific MORB, calculated by dividing BABB-like MORB averages by Pacific MORB averages.
