# Supplementary material for: The subduction influence on ocean ridge basalts and its significance
Source: Research Square preprint supplement (doi:10.21203/rs.3.rs-132754/v1), 2021-01-08
Supplement: Supplementary file 9 [file a28f34bc7b87c9fddc7d286c.xlsx]

## Sheet: table 2
Table 2 Major and trace element compositions of in-house quality control VE32 and BHVO-2G for standardization
	Na2O	MgO	Al2O3	SiO2	P2O5	K2O	CaO	TiO2	MnO	FeO	Li	Be	B	Sc	V	Cr	Co	Ni	Cu	Zn	Ga	Ge	Rb	Sr	Y	Zr	Nb	Mo	Ag	Cd	In	Sn	Sb	Cs	Ba	La	Ce	Pr	Nd	Sm	Eu	Gd	Tb	Dy	Ho	Er	Tm	Yb	Lu
Isotope Measured	23Na	26Mg	27Al	29Si	31P	39K	42Ca	47Ti	55Mn	57Fe	7Li	9Be	11B	45Sc	51V	52Cr	59Co	60Ni	63Cu	66Zn	69Ga	72Ge	85Rb	86Sr	89Y	90Zr	93Nb	95Mo	107Ag	111Cd	115In	118Sn	125Sb	133Cs	138Ba	139La	140Ce	141Pr	146Nd	147Sm	153Eu	157Gd	159Tb	163Dy	165Ho	166Er	169Tm	172Yb	175Lu
	(%)	(%)	(%)	(%)	(%)	(%)	(%)	(%)	(%)	(%)	(ppm)	(ppm)	(ppm)	(ppm)	(ppm)	(ppm)	(ppm)	(ppm)	(ppm)	(ppm)	(ppm)	(ppm)	(ppm)	(ppm)	(ppm)	(ppm)	(ppm)	(ppm)	(ppm)	(ppm)	(ppm)	(ppm)	(ppm)	(ppm)	(ppm)	(ppm)	(ppm)	(ppm)	(ppm)	(ppm)	(ppm)	(ppm)	(ppm)	(ppm)	(ppm)	(ppm)	(ppm)	(ppm)	(ppm)
VE32	3.03378	6.74251	13.8266	51.0736	0.20291	0.298488	10.7172	1.82958	0.209701	11.7584	7.87212	0.690585	1.1266	42.2724	330.659	131.941	43.8656	50.432	67.9093	101.972	18.7748	1.6074	3.1796	168.993	36.327	125.316	6.28538	0.492863	0.0611293	0.163642	0.0968173	1.13709	0.0150476	0.032061	54.3706	6.32665	16.8334	2.65844	13.4202	4.26201	1.52226	5.41104	0.930881	6.32206	1.29798	3.75644	0.519678	3.47632	0.522644
VE32	3.00873	6.61489	13.8528	51.1993	0.20058	0.294839	10.7486	1.82733	0.207662	11.6994	5.87834	0.795615	0.935691	43.0973	328	130.612	43.3416	48.6311	68.1695	99.2452	18.2783	1.60797	3.17425	168.428	36.3994	125.219	6.21829	0.482585	0.051723	0.173843	0.0989901	1.12824	0.00715207	0.0346742	53.7504	6.20501	16.9611	2.61485	13.4302	4.2888	1.51062	5.30982	0.928033	6.09244	1.28477	3.80144	0.541945	3.63475	0.508653
VE32	3.13372	6.5821	13.6036	51.3991	0.205122	0.305715	10.6384	1.79438	0.211459	11.8143	5.77332	0.749174	0.97471	42.4297	332.868	132.021	44.971	50.1897	66.3791	101.235	19.0917	1.6909	3.31939	168.802	35.3368	122.804	6.38181	0.525602	0.0603536	0.18585	0.0886819	1.11578	0.0109674	0.0324829	54.5724	6.237	17.1111	2.70171	13.4816	4.3614	1.52879	5.30155	0.917968	6.00184	1.27977	3.55229	0.535188	3.45399	0.512688
VE32	2.9848	6.6543	13.9742	51.0548	0.204411	0.291216	10.8111	1.82909	0.209374	11.6987	6.086	0.632923	0.903782	42.9649	328.489	131.367	43.8786	49.3921	67.7662	107.132	18.4856	1.71966	3.21949	169.219	36.2572	124.93	6.14189	0.466511	0.0582403	0.144819	0.0876619	1.15367	0.0103101	0.0310447	54.1015	6.14218	16.7257	2.64127	13.2546	4.11043	1.51197	5.45467	0.925278	6.17024	1.30701	3.75042	0.544125	3.49739	0.523099
VE32	2.99754	6.59411	14.1077	51.008	0.199362	0.292331	10.9366	1.84371	0.206209	11.6127	5.95124	0.702382	0.899814	43.6525	327.549	128.741	42.8333	48.4563	63.8094	96.4071	18.0497	1.67793	3.13589	168.969	36.786	127.332	6.18292	0.453863	0.0602749	0.160768	0.0823577	1.07532	0.018511	0.0308913	52.7507	6.2129	16.6095	2.64254	13.1202	4.23279	1.51953	5.29107	0.946048	6.16585	1.32639	3.71652	0.535162	3.53166	0.547687
VE32	3.01059	6.63095	14.1941	51.0177	0.203012	0.290278	11.1053	1.85491	0.206487	11.6001	6.83861	0.79853	1.02913	43.6042	326.437	130.266	43.6104	49.9445	69.5756	100.279	19.0763	1.64599	3.29766	168.029	35.8828	125.156	6.31496	0.527306	0.0921423	0.14308	0.0967347	1.09234	0.0150228	0.0316381	53.4493	6.17336	16.7542	2.64503	13.5353	4.25367	1.45955	5.2415	0.931855	6.20976	1.30096	3.68115	0.56273	3.47207	0.537372
VE32	3.00761	6.57592	14.0791	51.0942	0.204397	0.290232	10.7917	1.81848	0.205271	11.4859	7.15569	0.836217	0.893036	43.6139	328.111	128.328	43.36	49.4819	66.568	100.011	18.3881	1.63972	3.16909	167.78	36.577	126.354	6.24139	0.459702	0.0679337	0.123507	0.0923012	1.03334	0.0168656	0.0324051	53.5182	6.20147	16.7394	2.64384	13.2387	4.2298	1.52907	5.35772	0.961479	6.16676	1.30565	3.68539	0.552049	3.6185	0.516796
VE32	2.99091	6.58454	14.0632	50.8778	0.202947	0.287175	10.8848	1.84857	0.208661	11.7163	7.32613	0.95132	0.94767	43.3264	330.508	128.449	43.2084	50.1127	76.22	99.9021	18.3846	1.70789	3.20544	166.645	37.7511	130.021	6.19806	0.499777	0.0310639	0.189184	0.0938933	1.20518	9.38553e-05	0.0290904	52.9076	6.3597	16.8935	2.67039	13.4707	4.34936	1.49315	5.38967	0.955231	6.44191	1.33181	3.90801	0.592212	3.54815	0.553699
VE32	3.02547	6.62816	13.8646	51.2571	0.208792	0.293721	10.7334	1.82462	0.207578	11.7001	7.65857	0.873231	0.996664	43.5066	325.409	130.79	43.6027	50.5618	76.8535	101.791	18.9461	1.69137	3.31556	169.104	38.1192	130.088	6.1928	0.459135	0.0229392	0.291506	0.0983456	1.16846	0.0179828	0.0323286	52.7658	6.25529	16.6495	2.61639	13.3267	4.31488	1.49576	5.49827	0.949625	6.30573	1.36638	3.93141	0.539943	3.64166	0.555395
VE32	3.00376	6.66413	13.6375	51.6172	0.210996	0.294276	10.5274	1.79718	0.207628	11.7303	6.93937	0.556543	0.917514	42.3936	331.19	132.785	45.4017	52.7334	76.2537	103.884	19.5251	1.74298	3.33593	168.746	36.0387	123.957	6.21542	0.519985	0.0221204	0.206191	0.0971232	1.2113	0.0100293	0.0319957	54.4639	6.15716	16.6775	2.59332	12.9997	4.14368	1.43659	5.13439	0.899218	6.05666	1.25394	3.63347	0.550239	3.43469	0.51804
VE32	2.98711	6.55377	13.8223	51.4944	0.209768	0.288888	10.7319	1.81868	0.206727	11.6112	7.1111	0.653201	0.921493	42.8869	329.977	131.346	43.9083	51.7156	68.4852	98.2974	18.6989	1.71797	3.3475	166.878	37.1855	126.429	6.18687	0.499921	0.0381727	0.1067	0.0950572	1.19935	0.0143987	0.0300973	52.6124	6.09628	16.5089	2.55823	13.4629	4.27716	1.50054	5.5166	0.97251	6.2216	1.28137	3.76995	0.545476	3.69283	0.559593
VE32	2.96469	6.61887	13.9713	51.1995	0.203934	0.288912	10.7548	1.83354	0.207376	11.6689	7.32825	0.677424	0.705465	42.4124	333.903	130.391	43.5546	49.7015	70.0275	97.8632	18.4046	1.64726	3.22487	168.658	36.4785	125.282	6.19192	0.471212	0.0224897	0.207711	0.104106	1.15125	0.00866325	0.0326109	52.9039	6.00036	16.3826	2.58942	13.2729	4.1705	1.48226	5.31925	0.950467	6.05237	1.29762	3.78515	0.546614	3.55266	0.529154
VE32	2.97205	6.57746	13.8481	51.3556	0.212231	0.291632	10.8038	1.83306	0.205518	11.6263	8.04921	0.738568	0.861121	42.6158	330.044	131.215	44.7603	52.7531	73.0168	99.7333	19.0756	1.62643	3.32892	167.513	36.6196	126.331	6.17955	0.48961	0.0297229	0.116925	0.0997067	1.13749	0.0159205	0.0295171	52.2902	5.99128	16.5125	2.58229	13.1979	4.03685	1.51439	5.25389	0.947795	6.33465	1.29492	3.74297	0.552031	3.55137	0.526894
VE32	2.93496	6.65173	14.0445	50.7574	0.199312	0.284435	10.9737	1.85443	0.209084	11.7522	8.85694	0.761724	0.923711	42.9807	329.451	131.459	42.7181	48.6092	64.4853	95.6263	17.9842	1.60131	3.18304	167.49	35.934	124.294	6.12493	0.428574	0.0517505	0.173891	0.0949503	1.12696	0.00851955	0.0313056	53.3071	6.10759	16.5358	2.61122	13.2854	4.05395	1.42494	5.4297	0.892223	6.1771	1.31836	3.69881	0.560793	3.4068	0.528341
VE32	3.05437	6.57517	13.6842	51.2731	0.210585	0.295195	10.7835	1.81015	0.208679	11.8111	8.73001	0.810482	1.26264	42.2542	336.031	135.316	45.764	51.1091	71.2236	100.498	19.4599	1.75701	3.35312	171.991	35.8696	124.736	6.43811	0.510733	0.0632919	0.148617	0.0996558	1.1732	0.0124743	0.035901	55.4583	6.33578	17.2924	2.69289	13.7719	4.28454	1.52854	5.31346	0.934446	6.15658	1.26815	3.59038	0.503154	3.47368	0.510842
VE32	2.99485	6.66141	14.1352	50.6079	0.196451	0.290874	10.9535	1.86682	0.209044	11.7009	6.82561	0.760475	1.16035	42.82	327.804	128.631	42.9264	49.2846	66.3209	96.0378	18.2149	1.66178	3.15071	167.394	37.3395	127.573	6.14764	0.499508	0.040687	0.124605	0.0976514	1.13191	0.0135106	0.0281172	53.3455	6.14358	16.5105	2.58872	13.4377	4.25853	1.49653	5.21701	0.92657	6.00722	1.29973	3.67856	0.550662	3.52694	0.527666
VE32	3.00874	6.69167	13.9543	51.1457	0.204593	0.294088	10.6761	1.82646	0.208762	11.6829	7.85711	0.737759	1.10505	43.1066	329.303	130.639	44.1394	50.5632	68.7044	102.021	19.0044	1.76124	3.29282	170.634	37.4787	127.874	6.25776	0.473383	0.0490201	0.140845	0.102762	1.213	0.0130491	0.026798	53.0979	6.16681	16.6597	2.62018	13.4653	4.14206	1.45947	5.19388	0.945599	6.23047	1.29303	3.76959	0.548085	3.60008	0.542417
VE32	2.94014	6.73241	14.1754	50.6456	0.204172	0.28558	10.9318	1.86524	0.209631	11.7483	7.55376	0.703053	0.543066	43.486	329.351	129.808	43.0122	48.9383	65.2991	96.8375	18.4008	1.64502	3.12146	167.579	37.636	129.707	6.21528	0.523392	0.0290505	0.165761	0.0962169	1.16638	0.0139309	0.0277146	52.7731	6.1458	16.6223	2.62516	13.7303	4.30084	1.51966	5.48673	0.928208	6.24154	1.33987	3.91022	0.577647	3.67884	0.531333
VE32	2.9177	6.6257	14.0572	51.3762	0.200074	0.288532	10.7942	1.85187	0.206667	11.441	7.84223	0.8605	0.591806	42.9827	328.678	129.392	43.8098	49.1463	65.5892	98.3302	18.9429	1.66044	3.28752	169.309	36.4654	127.116	6.19322	0.468467	0.0315641	0.170785	0.0844679	1.11233	0.00923769	0.029264	53.6594	6.14878	16.5626	2.61877	13.2535	4.31797	1.50478	5.19097	0.930351	6.11727	1.2925	3.7354	0.525843	3.64076	0.502398
VE32	2.985	6.63617	14.0322	51.1014	0.202043	0.289869	10.796	1.84032	0.207086	11.6142	6.85009	0.686845	1.10952	42.9793	330.727	128.467	43.2488	47.7413	69.1047	95.093	18.4532	1.6926	3.2149	166.209	35.5079	124.004	6.11904	0.492669	0.087097	0.185347	0.0923967	1.03554	0.00503851	0.0321108	52.5039	6.08729	16.6509	2.61423	13.2183	4.18397	1.45661	5.33986	0.912398	6.34788	1.26736	3.68446	0.54265	3.68227	0.532489
VE32	2.9231	6.58554	13.8986	51.4158	0.211993	0.288427	10.8446	1.81917	0.205607	11.5117	8.41305	0.622411	1.14225	43.2308	330.143	131.17	44.263	49.8443	69.4218	102.209	19.098	1.71838	3.2904	169.658	36.3379	126.412	6.21859	0.506899	0.0557976	0.169179	0.0992636	1.21371	0.0165966	0.0369645	52.9099	6.01212	16.4182	2.59965	13.0779	4.1394	1.44029	5.30794	0.902093	6.00374	1.30918	3.65565	0.554116	3.43901	0.538318
VE32	2.95829	6.56345	14.3476	50.8124	0.201918	0.291539	10.9339	1.86436	0.206299	11.4762	7.49267	0.833724	0.771078	42.5382	328.379	129.808	43.0018	49.0617	65.29	98.8685	17.8934	1.73764	3.20215	167.38	36.6748	126.296	6.02896	0.493228	0.0573328	0.113512	0.107479	1.05016	0.00646966	0.0297243	52.476	6.06973	16.1721	2.54659	13.3737	4.14884	1.49796	5.32292	0.89025	6.16525	1.29754	3.81821	0.524158	3.44631	0.553058
VE32	2.91489	6.59152	14.1622	51.3123	0.199906	0.289468	10.841	1.83057	0.205271	11.3896	6.76412	0.997711	0.672612	43.174	325.931	129.117	43.0577	48.7515	66.8081	100.577	18.3464	1.65748	3.17085	168.857	37.482	129.545	6.12762	0.495591	0.0555663	0.182934	0.101982	1.18853	0.0122813	0.0275543	52.8895	6.17948	16.4678	2.61162	13.5598	4.27932	1.52853	5.71805	0.98584	6.55978	1.37445	3.81846	0.563725	3.67274	0.54307
VE32	2.93937	6.58053	14.2133	51.2089	0.202063	0.28943	10.8702	1.84427	0.204192	11.3309	6.40583	0.938835	0.867308	42.7366	325.25	128.42	43.2285	48.4071	65.4425	97.502	18.1321	1.58455	3.2216	168.674	37.678	129.44	6.17143	0.444571	0.038675	0.177745	0.0989498	1.20005	0.0196511	0.0242115	53.4203	6.30081	16.7138	2.66171	13.5098	4.26498	1.51232	5.55958	1.00357	6.35843	1.35963	3.7737	0.569987	3.72073	0.588473
VE32	2.91863	6.59172	14.5009	50.7005	0.199633	0.292023	11.0711	1.86746	0.20471	11.3775	7.81993	0.932209	1.14531	43.9459	328.554	129.616	43.6321	48.8331	66.9339	98.6251	18.562	1.68163	3.2015	168.557	38.2641	131.481	6.25007	0.457073	0.0565715	0.16197	0.0979434	1.10009	0.0100275	0.0275864	53.4567	6.38512	16.8188	2.64484	13.8213	4.3507	1.53733	5.58031	0.999398	6.35035	1.37748	3.95458	0.582657	3.74554	0.59609
VE32	2.97206	6.59466	14.05	51.1165	0.203403	0.286478	10.8118	1.84534	0.205282	11.5764	9.22297	0.663394	1.01373	43.8742	330.493	130.487	43.4407	49.7751	65.8039	97.0075	18.4226	1.55996	3.2345	168.113	37.1922	127.933	6.2465	0.55732	0.0715591	0.177134	0.101163	1.20453	0.0157478	0.0308215	53.5793	6.31297	16.8616	2.66276	13.8071	4.20913	1.52624	5.65797	0.952869	6.35061	1.40483	3.81731	0.575968	3.63528	0.581003
VE32	2.96639	6.58416	14.1798	50.8034	0.198005	0.287097	11.0139	1.82766	0.20539	11.6244	7.59562	0.788668	0.878736	43.1738	328.089	127.977	42.4196	49.0996	64.7833	96.0572	18.1633	1.64102	3.12116	169.088	37.6224	127.978	6.1605	0.519433	0.0457659	0.0981214	0.090994	1.07832	0.0179423	0.0289938	52.4697	6.25204	16.5432	2.63514	13.6521	4.32872	1.50506	5.62552	0.961811	6.30281	1.3267	3.88173	0.579337	3.54358	0.555804
VE32	2.95754	6.66388	14.2988	50.8214	0.202535	0.288185	10.8191	1.85342	0.206889	11.6358	8.75807	0.787097	0.998445	44.2836	326.232	129.019	43.5398	48.1484	65.1351	97.9264	18.2856	1.71247	3.1736	169.42	38.2786	132.421	6.29942	0.429888	0.0792709	0.16353	0.0884605	1.1791	0.0100452	0.0361243	53.8617	6.33757	16.6437	2.6572	13.6214	4.38189	1.48178	5.5058	1.00148	6.44894	1.35345	3.84225	0.568423	3.685	0.565878
VE32	2.95142	6.67028	14.1814	50.5818	0.206369	0.287154	11.0259	1.85199	0.208626	11.7388	7.13305	0.852858	1.23045	43.2972	329.711	130.192	42.7972	47.6916	68.264	99.5147	18.7907	1.74208	3.26183	169.254	37.4397	130.019	6.3903	0.508933	0.0786368	0.164628	0.0947945	1.22083	0.00569778	0.0304826	54.3407	6.44453	17.1256	2.68119	13.8015	4.26025	1.58914	5.58628	0.996374	6.56903	1.36656	3.90309	0.56507	3.8308	0.541814
VE32	2.95212	6.54659	14.1563	50.8804	0.200594	0.288923	11.0122	1.8585	0.206175	11.5821	6.34979	0.7065	0.878351	43.3465	330.447	131.403	43.7403	47.9255	66.1524	98.4832	18.2526	1.63092	3.16715	168.764	37.3165	129.177	6.11683	0.478116	0.0890394	0.201648	0.107747	1.09319	0.00804647	0.0332157	53.6884	6.22686	16.6971	2.62182	13.4564	4.16873	1.49589	5.42647	0.948772	6.21063	1.33621	3.85433	0.567952	3.6203	0.529228
VE32	2.9787	6.63184	14.1739	50.9087	0.20907	0.29091	10.8686	1.84658	0.20688	11.632	5.90134	0.646704	1.06765	43.6686	327.5	132.974	46.3857	60.8526	73.5749	101.295	18.3379	1.71414	3.24962	168.008	37.7439	128.778	6.1525	0.497816	0.0706046	0.16769	0.0982963	1.15201	0.00790072	0.0274247	53.1491	6.30902	16.7747	2.65103	13.543	4.33499	1.47929	5.46452	0.95306	6.47198	1.36407	3.82671	0.556809	3.82076	0.55013
VE32	2.95019	6.58534	14.2238	50.9211	0.206456	0.28752	10.8947	1.8672	0.204297	11.5011	8.64839	0.869796	0.83898	42.7526	329.843	127.304	43.9287	53.9081	80.6606	99.2591	18.3183	1.70023	3.14824	166.009	37.0815	128.189	6.15713	0.511566	0.0170764	0.23734	0.0792786	1.36294	0.00835243	0.0318957	52.4426	6.18068	16.4391	2.60318	13.6668	4.37764	1.51584	5.36914	0.95702	6.2343	1.35405	3.83369	0.577108	3.61753	0.544229
VE32	3.01444	6.53449	14.4617	50.9287	0.205421	0.284953	10.9662	1.8336	0.20228	11.2951	7.40894	0.830211	0.593977	42.2519	328.823	127.404	43.4311	50.6399	72.582	98.6914	18.7439	1.65685	3.25068	167.503	36.5653	127.706	6.13224	0.493761	0.0220051	0.14328	0.0890383	1.17476	0.0110973	0.0250092	52.5089	6.16554	16.4711	2.59528	13.3396	4.13178	1.47353	5.2726	0.923649	6.16955	1.27469	3.64395	0.554357	3.50373	0.518735
VE32	2.99739	6.62107	14.1412	50.7748	0.210555	0.292556	10.9513	1.85286	0.208023	11.6514	7.96048	0.966277	0.814519	43.1421	328.566	128.249	43.9959	51.2981	70.5356	100.456	19.0432	1.61575	3.27523	167.672	37.0317	127.294	6.15612	0.488755	0.0238508	0.18776	0.0775232	1.13393	0.0185617	0.0326446	52.0582	6.05321	16.2774	2.59679	13.3668	4.23776	1.51478	5.19713	0.928755	6.26619	1.3357	3.83603	0.55887	3.47176	0.536407
VE32	2.96149	6.66803	14.2984	50.7999	0.209304	0.287683	10.9169	1.85697	0.207033	11.5323	7.23889	0.798301	1.14441	42.633	327.923	126.459	44.4794	52.2556	74.9296	99.7042	18.664	1.62614	3.20759	167.025	36.8255	128.415	6.11492	0.423356	0.0186301	0.207133	0.0812975	1.25769	0.010184	0.0236954	53.5978	6.13914	16.495	2.58409	13.6033	4.36127	1.54441	5.4458	0.934189	6.27489	1.31658	3.70332	0.543714	3.67958	0.554248
VE32	2.9273	6.69393	14.0762	50.963	0.202399	0.286344	10.829	1.85964	0.208077	11.68	6.92026	0.672737	1.02186	43.4836	336.828	132.688	45.2541	50.8285	77.7322	103.022	19.185	1.81804	3.13006	172.113	37.5828	130.142	6.34005	0.522258	0.0215815	0.223065	0.0785134	1.25955	0.010997	0.0277192	54.8231	6.24455	16.8714	2.72281	13.6742	4.29887	1.56306	5.33407	0.974381	6.36228	1.30327	3.86945	0.565518	3.67082	0.52654
VE32	2.93608	6.63704	14.1437	51.2114	0.206241	0.285762	10.6967	1.85022	0.206359	11.5342	7.08763	0.534758	0.687104	43.5052	329.642	130.987	43.754	50.3204	77.1412	99.7791	18.6166	1.60484	3.19994	168.416	37.2955	127.144	6.16012	0.445482	0.0306911	0.208773	0.0993131	1.10601	0.0102049	0.0333809	52.8935	6.08048	16.6295	2.58208	13.2359	4.19667	1.47135	5.38968	0.967037	6.30174	1.3115	3.82494	0.586934	3.45607	0.523722
VE32	2.93355	6.64331	14.1094	51.1217	0.203131	0.283409	10.7363	1.84707	0.207956	11.5543	7.32314	0.743088	0.87999	43.4224	329.296	130.153	43.5283	50.1754	75.9544	97.0986	18.2721	1.70475	3.08773	167.836	37.5684	127.338	6.19162	0.461493	0.0176754	0.183118	0.0834203	1.08167	0.00926068	0.0325288	53.3823	6.24592	16.608	2.6092	13.1989	4.22578	1.4959	5.44172	0.994457	6.20639	1.31662	3.8516	0.577482	3.67461	0.564254
VE32	2.98509	6.65899	14.0241	51.338	0.205731	0.292117	10.6129	1.84171	0.206943	11.5264	7.14611	0.727221	1.16362	42.8797	332.324	131.227	44.0829	50.8016	69.4982	102.734	19.1107	1.69373	3.26321	166.54	37.0684	127.729	6.1779	0.473875	0.0322071	0.201341	0.0951123	1.1579	0.00349526	0.0348249	52.9725	6.21932	16.4413	2.62256	13.3176	4.22169	1.52345	5.34419	0.942412	6.34479	1.31698	3.85779	0.567569	3.57864	0.526536
VE32	2.94364	6.64272	14.0823	51.1315	0.202047	0.287642	10.7172	1.84222	0.207416	11.7097	7.33481	0.752197	0.991608	42.6855	332.887	132.527	43.1036	48.8775	65.9013	103.522	18.5538	1.52245	3.18474	167.507	36.3334	126.463	6.17649	0.495774	0.0702071	0.125419	0.104741	1.18836	0.0102236	0.034132	53.08	6.09832	16.8081	2.69033	13.5756	4.22788	1.48708	5.22359	0.942247	6.00747	1.34156	3.83274	0.556872	3.35691	0.534662
VE32	2.90291	6.95535	14.1426	50.4703	0.192902	0.278796	10.9317	1.87171	0.209153	11.7686	8.18627	0.676383	1.34653	42.2764	331.462	130.45	42.9378	49.1214	64.0098	96.2334	17.9634	1.70449	3.04778	167.653	36.8627	127.364	6.29156	0.558363	0.0631973	0.182606	0.0874673	1.11032	0.0104945	0.0267252	53.6626	6.22584	17.1444	2.71428	13.8158	4.30897	1.56682	5.52286	0.924329	6.32493	1.32855	3.74242	0.54864	3.71958	0.547156
VE32	2.92204	6.64456	14.313	50.7112	0.195364	0.285792	11.0678	1.87014	0.205804	11.5621	6.8008	0.670674	1.16133	43.282	326.172	128.678	42.396	48.2563	63.1992	97.1644	18.5094	1.74281	3.20455	169.677	37.0684	130.166	6.22012	0.528034	0.0811621	0.285107	0.096493	1.10683	0.0119234	0.0260706	53.7154	6.29282	16.6955	2.61176	13.8675	4.43195	1.49685	5.47276	0.977249	6.31779	1.35783	3.90606	0.554185	3.65993	0.543587
VE32	2.9707	6.68545	14.3253	50.4972	0.198716	0.28665	10.9694	1.87412	0.208095	11.6703	6.81829	0.708497	1.08824	42.8755	327.636	130.457	42.4659	48.1667	65.8142	97.3275	18.5665	1.59579	3.15033	169.033	37.7566	129.59	6.32133	0.525609	0.0816621	0.233701	0.0811629	1.05665	0.00765885	0.0317345	52.8586	6.22367	16.5706	2.66106	13.5765	4.34972	1.51307	5.30858	0.943227	6.13823	1.33626	3.76502	0.572768	3.6188	0.553221
VE32	2.93785	6.7101	14.2555	50.3431	0.202242	0.280509	11.1637	1.89529	0.207731	11.7365	6.7761	0.694496	0.816144	43.3302	326.238	129.072	42.7367	48.6106	66.4242	101.113	18.5733	1.80719	3.25048	169.452	37.0577	128.348	6.30482	0.498811	0.0606941	0.100584	0.10088	1.13136	0.0194085	0.0279927	53.9282	6.21501	16.6192	2.61806	13.5812	4.3111	1.50845	5.3237	0.925952	6.27967	1.34037	3.79996	0.561219	3.5081	0.545482
VE32	3.01195	6.65016	13.8992	51.2534	0.210018	0.293453	10.688	1.82599	0.207399	11.7042	6.48824	0.8704	0.77412	43.3947	331.835	130.961	44.3195	48.7685	68.8554	102.531	19.3996	1.61575	3.30412	165.579	36.7184	126.187	6.21646	0.472113	0.0581967	0.147961	0.0881765	1.15841	0.0108836	0.0290014	52.5987	6.09599	16.5739	2.62375	13.394	4.08133	1.54135	5.21461	0.94284	6.09868	1.27382	3.77003	0.563332	3.4468	0.543075
VE32	2.97997	6.57603	13.9495	51.5156	0.209192	0.290136	10.6048	1.81646	0.206714	11.5447	7.34894	0.670749	0.981567	42.9633	329.18	130.172	44.554	48.4285	66.4852	99.0448	18.7702	1.74971	3.2388	167.845	36.5256	126.085	6.04745	0.440871	0.0662759	0.189547	0.0900161	1.18477	0.0230556	0.0315411	52.8544	6.10098	16.3442	2.59718	13.464	4.12429	1.49318	5.27333	0.940394	6.11547	1.31815	3.79565	0.560302	3.54486	0.553365
VE32	2.99239	6.63146	14.0131	51.1864	0.20729	0.293065	10.6986	1.83269	0.207531	11.6424	6.77332	0.840636	1.22069	44.0378	332.681	132.84	44.9495	50.2329	68.395	103.919	19.2112	1.76473	3.30354	168.376	37.1946	128.448	6.13342	0.487828	0.0536664	0.159844	0.103514	1.18366	0.0185403	0.025997	53.5333	6.22136	16.5098	2.6207	13.4118	4.32184	1.53851	5.3692	0.921642	6.23673	1.31151	3.72042	0.558321	3.53661	0.548944
VE32	2.99335	6.66231	13.9956	51.0318	0.207272	0.289611	10.852	1.82859	0.207251	11.645	8.12421	0.725282	1.0361	43.7503	332.698	131.548	44.1923	50.7186	67.1453	101.466	18.8707	1.64858	3.28548	168.414	37.0692	126.447	6.29693	0.430002	0.0397373	0.196184	0.0894186	1.24137	0.0143528	0.0321499	54.2651	6.18895	16.6738	2.67716	13.7041	4.10016	1.49557	5.50807	0.929465	6.11656	1.2812	3.74222	0.556197	3.54023	0.553191
VE32	2.95825	6.63574	14.1577	50.9056	0.202591	0.28915	10.8507	1.85049	0.206909	11.614	7.65833	0.711625	0.578823	43.6257	332.666	130.548	43.9914	48.3751	69.9743	97.5763	18.6432	1.64362	3.1968	167.112	37.1299	127.689	6.28603	0.469038	0.0255032	0.142964	0.0989629	1.20352	0.011013	0.0325511	52.7879	6.10141	16.4117	2.53434	13.2594	4.13907	1.46516	5.24112	0.946979	6.34444	1.28697	3.75104	0.544382	3.55897	0.526111
VE32	2.89888	6.63905	14.1046	51.1241	0.208658	0.288349	10.7608	1.84442	0.208751	11.6109	7.25784	0.77787	0.781502	43.5628	330.527	130.073	44.4004	50.5557	71.3287	102.879	19.0065	1.6633	3.25483	166.731	36.3275	126.251	6.26044	0.486169	0.022736	0.141706	0.0802046	1.14476	0.0179045	0.0322698	53.175	6.09704	16.4703	2.64155	13.2774	4.33214	1.49431	5.48601	0.942498	6.22949	1.30814	3.71671	0.541094	3.59604	0.53896
VE32	2.9677	6.73192	14.251	50.5304	0.207926	0.28786	10.9162	1.87509	0.210547	11.7498	7.16963	0.718886	0.956863	43.1886	327.403	132.327	44.3029	49.7906	71.3007	106.28	19.495	1.7046	3.25311	167.916	36.8294	127.016	6.20254	0.518945	0.0316736	0.147218	0.0975702	1.16976	0.00866405	0.0309191	54.2259	6.30639	16.7611	2.6501	13.543	4.38314	1.49961	5.30912	0.963157	6.34318	1.32108	3.76435	0.555355	3.658	0.541658
VE32	2.92319	6.68478	14.1302	50.7196	0.206489	0.287484	10.9734	1.85956	0.208759	11.7387	6.76311	0.699183	0.841786	43.6994	326.106	128.774	42.8899	48.987	69.2557	101.562	18.4495	1.64263	3.16082	169.047	37.0557	127.486	6.25291	0.5348	0.0406609	0.203629	0.0926972	1.12063	0.00974951	0.0323869	52.8502	6.23796	16.6766	2.64701	13.7698	4.30035	1.53671	5.501	0.959333	6.18757	1.33281	3.80133	0.547065	3.618	0.54475
VE32	2.94097	6.64161	13.9901	51.0685	0.206512	0.285808	10.8516	1.85169	0.20864	11.6653	7.14551	0.767021	1.05615	40.3308	337.208	133.698	44.239	49.8327	68.5392	99.9004	18.6377	1.62001	3.26636	169.571	36.2203	126.101	6.40212	0.514525	0.0406803	0.160684	0.0998139	1.14733	0.0135581	0.0332516	53.5511	6.1237	16.9853	2.64406	13.1704	4.22098	1.51497	5.25217	0.930766	5.95905	1.27897	3.64998	0.524906	3.54279	0.511505
VE32	2.96565	6.63456	13.8392	51.4978	0.203992	0.290124	10.6968	1.84429	0.207146	11.5655	7.1821	0.753727	1.21456	41.0964	329.822	130.413	43.4541	49.0944	69.4528	98.0744	18.0762	1.60136	3.19405	167.607	36.5044	125.988	6.31479	0.530463	0.0297146	0.179112	0.0941793	1.14075	0.00880495	0.0295668	53.4916	6.16378	16.5382	2.63722	13.4308	4.30359	1.53563	5.29655	0.945764	6.31975	1.31118	3.74853	0.551745	3.639	0.536794
Average	2.97045	6.63645	14.0744	51.0215	0.204289	0.289457	10.8436	1.84388	0.207273	11.6213	7.29447	0.757901	0.953059	43.0523	329.685	130.355	43.7557	49.9247	69.1571	99.8074	18.6408	1.67279	3.22241	168.311	36.9202	127.363	6.21754	0.489733	0.0485013	0.172032	0.0939953	1.15318	0.0119541	0.0306137	53.3352	6.1916	16.6564	2.62939	13.46	4.24867	1.50516	5.37969	0.945175	6.23686	1.31732	3.7751	0.554859	3.58283	0.539763
RSD	0.0141001	0.0098157	0.0133103	0.00580868	0.0212302	0.0145952	0.01252	0.0108848	0.00814537	0.0100907	0.106814	0.13074	0.195288	0.0157538	0.00820776	0.0133123	0.0193825	0.0404316	0.0588139	0.0265647	0.0223123	0.0366023	0.0213531	0.00758583	0.0180723	0.0155661	0.0138614	0.0660699	0.437317	0.23071	0.0813853	0.0528475	0.38123	0.0978116	0.0131637	0.0160478	0.0132942	0.0149947	0.0157676	0.0219965	0.0212295	0.0245203	0.0280286	0.0220961	0.0245253	0.023212	0.0315282	0.0289675	0.0354182
VE32 solution data average	2.97	6.7	14.13	50.82	0.2	0.283	10.86	1.86	0.21	11.6	7.36	0.75		45.625	337.04	129.05	43.8	49.43	69.73	98.32	18.6	1.66	3.2	168.36	37.1	128	6.41	0.48				1.143		0.0306	53.94	6.24	16.82	2.64	13.74	4.24	1.497	5.35	0.95	6.341	1.32	3.739	0.555	3.618	0.55
Difference with solution data	0.000149863	-0.00948558	-0.0039338	0.00396568	0.0214469	0.0228166	-0.00151242	-0.00866418	-0.0129861	0.00183699	-0.00890337	0.0105352		-0.0563874	-0.0218226	0.0101104	-0.00101108	0.0100075	-0.00821532	0.0151283	0.00219417	0.00770274	0.00700225	-0.000292989	-0.00484535	-0.00497799	-0.0300242	0.0202762				0.00890417		0.000448126	-0.0112126	-0.00775577	-0.0097265	-0.00401961	-0.0203754	0.00204454	0.00544825	0.00555003	-0.00507914	-0.0164227	-0.00202778	0.00965448	-0.000254827	-0.0097208	-0.0186129
BHVO-2G for standardization	2.22	7.28	13.6	49.3	0.28	0.515	11.41	2.79	0.173225	11.3	4.664	1.20512	2.95	33	318.2	300.59	45.329	116	131	106	21.37	1.623	9.2	400	26.75	180	19.7	4.2	0.42	0.1054	0.1	1.70496	0.125	0.099072	133	15.428	38.0929	5.39239	24.634	6.13	2.05	6.16	0.93	5.33	0.99	2.52	0.34	2.02572	0.283662
[truncated: 7 more columns]
